# Supplementary material
Source: publisher figshare collection journal article supplement (https://wiley.figshare.com/ndownloader/files/14991164)
Supplement: Supplementary file 1 [file 14991164]

## Sheet: DATASET S1.1 (LD)
TITLE	JOURNAL	DATE	CATEGORY	AUTHORS	WEB_LINK	REFNB	REF	N	OBS_R	OBS_ID	STUDY_ID	BIOME	HABITAT_TYPE	FECOREGION	COUNTRY	LATITUDE	LONGITUDE	LAT	LONG	NAME	DAM	STATION	PURPOSE	UP_D	DIST_DAM	FILLING_TIME	DD(mean)	DD(MAX)	AREA(KM2)	AREA_BEFORE(KM2)	AREA_FL(KM2)	B_A(%)	ARCHETYPE	PERIM/AREA	CATCHMENT	DEPTH	IMPOUNDED	DATE	YEARS	DURATION	BA	RICHNESS	INVASIVE_INTRO	SH_DIV	SHE_DIV	COMMU	TROPHIC_LEVEL	MACROH	BARRIER
Fish Assemblage Changes in an Ozark River after Impoundment: A Long-Term Perspective	Transactions of the American Fisheries Society	2003	JOURNAL	Quinn, J. W., and T. J. Kwak.	https://www.tandfonline.com/doi/abs/10.1577/1548-8659(2003)132%3C0110%3AFACIAO%3E2.0.CO%3B2#.U0vPzrSurpc	1	Q&K2003	4	1	1	1	T	Temperate_upland_rivers	Ozark_Highlands	USA	36°21'15.6"N	93°55'25.9"W	36.3543	-93.9239	BEAVERL	BEAVER	1	MULTI	D	3.03	4	4.55	6.4	71.3	3.54	67.76	0.95	D	3.51669	3087	33.8	1963	1962	-1	33	B	33.9	0	2.38	0.675	Y	2.968	0.167	0
Fish Assemblage Changes in an Ozark River after Impoundment: A Long-Term Perspective	Transactions of the American Fisheries Society	2003	JOURNAL	Quinn, J. W., and T. J. Kwak.	https://www.tandfonline.com/doi/abs/10.1577/1548-8659(2003)132%3C0110%3AFACIAO%3E2.0.CO%3B2#.U0vPzrSurpc	1	Q&K2003	4	2	2	1	T	Temperate_upland_rivers	Ozark_Highlands	USA	36°21'15.6"N	93°55'25.9"W	36.3543	-93.9239	BEAVERL	BEAVER	1	MULTI	D	3.03	4	4.55	6.4	71.3	3.54	67.76	0.95	D	3.51669	3087	33.8	1963	1966	3	33	A	13.9	0	1.31	0.498	Y	2.658	0.114	0
Fish Assemblage Changes in an Ozark River after Impoundment: A Long-Term Perspective	Transactions of the American Fisheries Society	2003	JOURNAL	Quinn, J. W., and T. J. Kwak.	https://www.tandfonline.com/doi/abs/10.1577/1548-8659(2003)132%3C0110%3AFACIAO%3E2.0.CO%3B2#.U0vPzrSurpc	1	Q&K2003	4	3	3	1	T	Temperate_upland_rivers	Ozark_Highlands	USA	36°21'15.6"N	93°55'25.9"W	36.3543	-93.9239	BEAVERL	BEAVER	1	MULTI	D	3.03	4	4.55	6.4	71.3	3.54	67.76	0.95	D	3.51669	3087	33.8	1963	1968	5	33	A	20.6	2	1.76	0.582	Y	2.759	0.208	0
Fish Assemblage Changes in an Ozark River after Impoundment: A Long-Term Perspective	Transactions of the American Fisheries Society	2003	JOURNAL	Quinn, J. W., and T. J. Kwak.	https://www.tandfonline.com/doi/abs/10.1577/1548-8659(2003)132%3C0110%3AFACIAO%3E2.0.CO%3B2#.U0vPzrSurpc	1	Q&K2003	4	4	4	1	T	Temperate_upland_rivers	Ozark_Highlands	USA	36°21'15.6"N	93°55'25.9"W	36.3543	-93.9239	BEAVERL	BEAVER	1	MULTI	D	3.03	4	4.55	6.4	71.3	3.54	67.76	0.95	D	3.51669	3087	33.8	1963	1996	33	33	A	10.2	4	1.52	0.654	Y	3.619	0.386	0
Species Composition and Biomass of Fish in Selected Coves in Beaver Lake, Arkansas, during the First 18 Years of Impoundment (1963-1980)	North American Journal of Fisheries Management	1982	JOURNAL	William C. Rainwater, Alfred Houser	https://onlinelibrary.wiley.com/doi/abs/10.1577/1548-8659%281982%292%3C316%3ASCABOF%3E2.0.CO%3B2	2	R&H1982	18	1	1	2	T	Temperate_upland_rivers	Ozark_Highlands	USA	36°21'15.6"N	93°55'25.9"W	36.3543	-93.9239	BEAVERL	BEAVER	1	MULTI	UD	.	4	4.55	6.4	71.3	3.54	67.76	0.95	D	3.51669	3087	33.8	1963	1963	0	17	A	17	0	1.757	0.634	Y	3.792	0.98	0
Species Composition and Biomass of Fish in Selected Coves in Beaver Lake, Arkansas, during the First 18 Years of Impoundment (1963-1980)	North American Journal of Fisheries Management	1982	JOURNAL	William C. Rainwater, Alfred Houser	https://onlinelibrary.wiley.com/doi/abs/10.1577/1548-8659%281982%292%3C316%3ASCABOF%3E2.0.CO%3B2	2	R&H1982	18	2	2	2	T	Temperate_upland_rivers	Ozark_Highlands	USA	36°21'15.6"N	93°55'25.9"W	36.3543	-93.9239	BEAVERL	BEAVER	1	MULTI	UD	.	4	4.55	6.4	71.3	3.54	67.76	0.95	D	3.51669	3087	33.8	1963	1964	1	17	A	15	0	1.38	0.523	Y	3.653	0.995	0
Species Composition and Biomass of Fish in Selected Coves in Beaver Lake, Arkansas, during the First 18 Years of Impoundment (1963-1980)	North American Journal of Fisheries Management	1982	JOURNAL	William C. Rainwater, Alfred Houser	https://onlinelibrary.wiley.com/doi/abs/10.1577/1548-8659%281982%292%3C316%3ASCABOF%3E2.0.CO%3B2	2	R&H1982	18	3	3	2	T	Temperate_upland_rivers	Ozark_Highlands	USA	36°21'15.6"N	93°55'25.9"W	36.3543	-93.9239	BEAVERL	BEAVER	1	MULTI	UD	.	4	4.55	6.4	71.3	3.54	67.76	0.95	D	3.51669	3087	33.8	1963	1965	2	17	A	17	0	1.652	0.596	Y	3.491	0.982	0
Species Composition and Biomass of Fish in Selected Coves in Beaver Lake, Arkansas, during the First 18 Years of Impoundment (1963-1980)	North American Journal of Fisheries Management	1982	JOURNAL	William C. Rainwater, Alfred Houser	https://onlinelibrary.wiley.com/doi/abs/10.1577/1548-8659%281982%292%3C316%3ASCABOF%3E2.0.CO%3B2	2	R&H1982	18	4	4	2	T	Temperate_upland_rivers	Ozark_Highlands	USA	36°21'15.6"N	93°55'25.9"W	36.3543	-93.9239	BEAVERL	BEAVER	1	MULTI	UD	.	4	4.55	6.4	71.3	3.54	67.76	0.95	D	3.51669	3087	33.8	1963	1966	3	17	A	18	1	1.948	0.674	Y	3.821	0.976	0
Species Composition and Biomass of Fish in Selected Coves in Beaver Lake, Arkansas, during the First 18 Years of Impoundment (1963-1980)	North American Journal of Fisheries Management	1982	JOURNAL	William C. Rainwater, Alfred Houser	https://onlinelibrary.wiley.com/doi/abs/10.1577/1548-8659%281982%292%3C316%3ASCABOF%3E2.0.CO%3B2	2	R&H1982	18	5	5	2	T	Temperate_upland_rivers	Ozark_Highlands	USA	36°21'15.6"N	93°55'25.9"W	36.3543	-93.9239	BEAVERL	BEAVER	1	MULTI	UD	.	4	4.55	6.4	71.3	3.54	67.76	0.95	D	3.51669	3087	33.8	1963	1967	4	17	A	22	1	2.318	0.761	Y	4.447	1.096	0
Species Composition and Biomass of Fish in Selected Coves in Beaver Lake, Arkansas, during the First 18 Years of Impoundment (1963-1980)	North American Journal of Fisheries Management	1982	JOURNAL	William C. Rainwater, Alfred Houser	https://onlinelibrary.wiley.com/doi/abs/10.1577/1548-8659%281982%292%3C316%3ASCABOF%3E2.0.CO%3B2	2	R&H1982	18	6	6	2	T	Temperate_upland_rivers	Ozark_Highlands	USA	36°21'15.6"N	93°55'25.9"W	36.3543	-93.9239	BEAVERL	BEAVER	1	MULTI	UD	.	4	4.55	6.4	71.3	3.54	67.76	0.95	D	3.51669	3087	33.8	1963	1968	5	17	A	20	2	1.455	0.503	Y	3.957	1.03	0
Species Composition and Biomass of Fish in Selected Coves in Beaver Lake, Arkansas, during the First 18 Years of Impoundment (1963-1980)	North American Journal of Fisheries Management	1982	JOURNAL	William C. Rainwater, Alfred Houser	https://onlinelibrary.wiley.com/doi/abs/10.1577/1548-8659%281982%292%3C316%3ASCABOF%3E2.0.CO%3B2	2	R&H1982	18	7	7	2	T	Temperate_upland_rivers	Ozark_Highlands	USA	36°21'15.6"N	93°55'25.9"W	36.3543	-93.9239	BEAVERL	BEAVER	1	MULTI	UD	.	4	4.55	6.4	71.3	3.54	67.76	0.95	D	3.51669	3087	33.8	1963	1969	6	17	A	20	2	1.171	0.398	Y	3.44	0.879	0
Species Composition and Biomass of Fish in Selected Coves in Beaver Lake, Arkansas, during the First 18 Years of Impoundment (1963-1980)	North American Journal of Fisheries Management	1982	JOURNAL	William C. Rainwater, Alfred Houser	https://onlinelibrary.wiley.com/doi/abs/10.1577/1548-8659%281982%292%3C316%3ASCABOF%3E2.0.CO%3B2	2	R&H1982	18	8	8	2	T	Temperate_upland_rivers	Ozark_Highlands	USA	36°21'15.6"N	93°55'25.9"W	36.3543	-93.9239	BEAVERL	BEAVER	1	MULTI	UD	.	4	4.55	6.4	71.3	3.54	67.76	0.95	D	3.51669	3087	33.8	1963	1970	7	17	A	21	2	1.888	0.63	Y	3.989	1.021	0
Species Composition and Biomass of Fish in Selected Coves in Beaver Lake, Arkansas, during the First 18 Years of Impoundment (1963-1980)	North American Journal of Fisheries Management	1982	JOURNAL	William C. Rainwater, Alfred Houser	https://onlinelibrary.wiley.com/doi/abs/10.1577/1548-8659%281982%292%3C316%3ASCABOF%3E2.0.CO%3B2	2	R&H1982	18	9	9	2	T	Temperate_upland_rivers	Ozark_Highlands	USA	36°21'15.6"N	93°55'25.9"W	36.3543	-93.9239	BEAVERL	BEAVER	1	MULTI	UD	.	4	4.55	6.4	71.3	3.54	67.76	0.95	D	3.51669	3087	33.8	1963	1971	8	17	A	21	2	1.66	0.554	Y	4.002	1.014	0
Species Composition and Biomass of Fish in Selected Coves in Beaver Lake, Arkansas, during the First 18 Years of Impoundment (1963-1980)	North American Journal of Fisheries Management	1982	JOURNAL	William C. Rainwater, Alfred Houser	https://onlinelibrary.wiley.com/doi/abs/10.1577/1548-8659%281982%292%3C316%3ASCABOF%3E2.0.CO%3B2	2	R&H1982	18	10	10	2	T	Temperate_upland_rivers	Ozark_Highlands	USA	36°21'15.6"N	93°55'25.9"W	36.3543	-93.9239	BEAVERL	BEAVER	1	MULTI	UD	.	4	4.55	6.4	71.3	3.54	67.76	0.95	D	3.51669	3087	33.8	1963	1972	9	17	A	22	2	1.449	0.476	Y	3.501	0.893	0
Species Composition and Biomass of Fish in Selected Coves in Beaver Lake, Arkansas, during the First 18 Years of Impoundment (1963-1980)	North American Journal of Fisheries Management	1982	JOURNAL	William C. Rainwater, Alfred Houser	https://onlinelibrary.wiley.com/doi/abs/10.1577/1548-8659%281982%292%3C316%3ASCABOF%3E2.0.CO%3B2	2	R&H1982	18	11	11	2	T	Temperate_upland_rivers	Ozark_Highlands	USA	36°21'15.6"N	93°55'25.9"W	36.3543	-93.9239	BEAVERL	BEAVER	1	MULTI	UD	.	4	4.55	6.4	71.3	3.54	67.76	0.95	D	3.51669	3087	33.8	1963	1973	10	17	A	23	2	2.016	0.652	Y	4.664	1.193	0
Species Composition and Biomass of Fish in Selected Coves in Beaver Lake, Arkansas, during the First 18 Years of Impoundment (1963-1980)	North American Journal of Fisheries Management	1982	JOURNAL	William C. Rainwater, Alfred Houser	https://onlinelibrary.wiley.com/doi/abs/10.1577/1548-8659%281982%292%3C316%3ASCABOF%3E2.0.CO%3B2	2	R&H1982	18	12	12	2	T	Temperate_upland_rivers	Ozark_Highlands	USA	36°21'15.6"N	93°55'25.9"W	36.3543	-93.9239	BEAVERL	BEAVER	1	MULTI	UD	.	4	4.55	6.4	71.3	3.54	67.76	0.95	D	3.51669	3087	33.8	1963	1974	11	17	A	21	2	1.543	0.515	Y	3.567	0.917	0
Species Composition and Biomass of Fish in Selected Coves in Beaver Lake, Arkansas, during the First 18 Years of Impoundment (1963-1980)	North American Journal of Fisheries Management	1982	JOURNAL	William C. Rainwater, Alfred Houser	https://onlinelibrary.wiley.com/doi/abs/10.1577/1548-8659%281982%292%3C316%3ASCABOF%3E2.0.CO%3B2	2	R&H1982	18	13	13	2	T	Temperate_upland_rivers	Ozark_Highlands	USA	36°21'15.6"N	93°55'25.9"W	36.3543	-93.9239	BEAVERL	BEAVER	1	MULTI	UD	.	4	4.55	6.4	71.3	3.54	67.76	0.95	D	3.51669	3087	33.8	1963	1975	12	17	A	23	2	1.615	0.523	Y	3.273	0.84	0
Species Composition and Biomass of Fish in Selected Coves in Beaver Lake, Arkansas, during the First 18 Years of Impoundment (1963-1980)	North American Journal of Fisheries Management	1982	JOURNAL	William C. Rainwater, Alfred Houser	https://onlinelibrary.wiley.com/doi/abs/10.1577/1548-8659%281982%292%3C316%3ASCABOF%3E2.0.CO%3B2	2	R&H1982	18	14	14	2	T	Temperate_upland_rivers	Ozark_Highlands	USA	36°21'15.6"N	93°55'25.9"W	36.3543	-93.9239	BEAVERL	BEAVER	1	MULTI	UD	.	4	4.55	6.4	71.3	3.54	67.76	0.95	D	3.51669	3087	33.8	1963	1976	13	17	A	23	3	1.514	0.49	Y	3.541	0.916	0
Species Composition and Biomass of Fish in Selected Coves in Beaver Lake, Arkansas, during the First 18 Years of Impoundment (1963-1980)	North American Journal of Fisheries Management	1982	JOURNAL	William C. Rainwater, Alfred Houser	https://onlinelibrary.wiley.com/doi/abs/10.1577/1548-8659%281982%292%3C316%3ASCABOF%3E2.0.CO%3B2	2	R&H1982	18	15	15	2	T	Temperate_upland_rivers	Ozark_Highlands	USA	36°21'15.6"N	93°55'25.9"W	36.3543	-93.9239	BEAVERL	BEAVER	1	MULTI	UD	.	4	4.55	6.4	71.3	3.54	67.76	0.95	D	3.51669	3087	33.8	1963	1977	14	17	A	22	3	1.604	0.519	Y	3.633	0.913	0
Species Composition and Biomass of Fish in Selected Coves in Beaver Lake, Arkansas, during the First 18 Years of Impoundment (1963-1980)	North American Journal of Fisheries Management	1982	JOURNAL	William C. Rainwater, Alfred Houser	https://onlinelibrary.wiley.com/doi/abs/10.1577/1548-8659%281982%292%3C316%3ASCABOF%3E2.0.CO%3B2	2	R&H1982	18	16	16	2	T	Temperate_upland_rivers	Ozark_Highlands	USA	36°21'15.6"N	93°55'25.9"W	36.3543	-93.9239	BEAVERL	BEAVER	1	MULTI	UD	.	4	4.55	6.4	71.3	3.54	67.76	0.95	D	3.51669	3087	33.8	1963	1978	15	17	A	22	3	1.741	0.572	Y	3.882	0.967	0
Species Composition and Biomass of Fish in Selected Coves in Beaver Lake, Arkansas, during the First 18 Years of Impoundment (1963-1980)	North American Journal of Fisheries Management	1982	JOURNAL	William C. Rainwater, Alfred Houser	https://onlinelibrary.wiley.com/doi/abs/10.1577/1548-8659%281982%292%3C316%3ASCABOF%3E2.0.CO%3B2	2	R&H1982	18	17	17	2	T	Temperate_upland_rivers	Ozark_Highlands	USA	36°21'15.6"N	93°55'25.9"W	36.3543	-93.9239	BEAVERL	BEAVER	1	MULTI	UD	.	4	4.55	6.4	71.3	3.54	67.76	0.95	D	3.51669	3087	33.8	1963	1979	16	17	A	23	3	1.823	0.599	Y	3.72	0.944	0
Species Composition and Biomass of Fish in Selected Coves in Beaver Lake, Arkansas, during the First 18 Years of Impoundment (1963-1980)	North American Journal of Fisheries Management	1982	JOURNAL	William C. Rainwater, Alfred Houser	https://onlinelibrary.wiley.com/doi/abs/10.1577/1548-8659%281982%292%3C316%3ASCABOF%3E2.0.CO%3B2	2	R&H1982	18	18	18	2	T	Temperate_upland_rivers	Ozark_Highlands	USA	36°21'15.6"N	93°55'25.9"W	36.3543	-93.9239	BEAVERL	BEAVER	1	MULTI	UD	.	4	4.55	6.4	71.3	3.54	67.76	0.95	D	3.51669	3087	33.8	1963	1980	17	17	A	21	3	0.935	0.318	Y	3.823	0.982	0
Changes in the Canadian River Fish Assemblage Associated with Reservoir Construction	Journal of Freshwater Ecology	2000	JOURNAL	Bonner, T. H., and G. R. Wilde	https://www.tandfonline.com/doi/abs/10.1080/02705060.2000.9663736#.U0Ku9rSurpc	3	B&W2000	4	1	1	3	T	Temperate_upland_rivers	US_Southern_Plains	USA	35°21'04.2"N	103°30'42.5"W	35.3512	-103.512	UTE	UTE	1	RECREATION	D	.	.	.	.	22.7	5.36	17.34	0.76	C	3.67509	28853	21.9	1963	1955	-8	33	B	10	.	0.996	0.433	Y	3.18	0.088	0
Changes in the Canadian River Fish Assemblage Associated with Reservoir Construction	Journal of Freshwater Ecology	2000	JOURNAL	Bonner, T. H., and G. R. Wilde	https://www.tandfonline.com/doi/abs/10.1080/02705060.2000.9663736#.U0Ku9rSurpc	3	B&W2000	4	2	2	3	T	Temperate_upland_rivers	US_Southern_Plains	USA	35°21'04.2"N	103°30'42.5"W	35.3512	-103.512	UTE	UTE	1	RECREATION	D	.	.	.	.	22.7	5.36	17.34	0.76	C	3.67509	28853	21.9	1963	1983	20	33	A	15	.	1.779	0.657	Y	3.06	0.233	0
Changes in the Canadian River Fish Assemblage Associated with Reservoir Construction	Journal of Freshwater Ecology	2000	JOURNAL	Bonner, T. H., and G. R. Wilde	https://www.tandfonline.com/doi/abs/10.1080/02705060.2000.9663736#.U0Ku9rSurpc	3	B&W2000	4	3	3	3	T	Temperate_upland_rivers	US_Southern_Plains	USA	35°21'04.2"N	103°30'42.5"W	35.3512	-103.512	UTE	UTE	1	RECREATION	D	.	.	.	.	22.7	5.36	17.34	0.76	C	3.67509	28853	21.9	1963	1990	27	33	A	10	.	1.463	0.635	Y	3.136	0.036	0
Changes in the Canadian River Fish Assemblage Associated with Reservoir Construction	Journal of Freshwater Ecology	2000	JOURNAL	Bonner, T. H., and G. R. Wilde	https://www.tandfonline.com/doi/abs/10.1080/02705060.2000.9663736#.U0Ku9rSurpc	3	B&W2000	4	4	4	3	T	Temperate_upland_rivers	US_Southern_Plains	USA	35°21'04.2"N	103°30'42.5"W	35.3512	-103.512	UTE	UTE	1	RECREATION	D	.	.	.	.	22.7	5.36	17.34	0.76	C	3.67509	28853	21.9	1963	1996	33	33	A	16	.	1.64	0.592	Y	3.117	0.098	0
Changes in the Canadian River Fish Assemblage Associated with Reservoir Construction	Journal of Freshwater Ecology	2000	JOURNAL	Bonner, T. H., and G. R. Wilde	https://www.tandfonline.com/doi/abs/10.1080/02705060.2000.9663736#.U0Ku9rSurpc	3	B&W2000_1	4	1	1	4	T	Temperate_upland_rivers	US_Southern_Plains	USA	35°41'27.2"N	101°35'55.4	35.6909	-101.599	MERIDITH	SANFORD	1	RECREATION	D	.	.	.	.	35	1.64	33.37	0.95	C	2.94518	52370	85.8	1965	1955	-10	31	B	15	.	0.749	0.277	Y	3.194	0.023	0
Changes in the Canadian River Fish Assemblage Associated with Reservoir Construction	Journal of Freshwater Ecology	2000	JOURNAL	Bonner, T. H., and G. R. Wilde	https://www.tandfonline.com/doi/abs/10.1080/02705060.2000.9663736#.U0Ku9rSurpc	3	B&W2000_1	4	2	2	4	T	Temperate_upland_rivers	US_Southern_Plains	USA	35°41'27.2"N	101°35'55.4	35.6909	-101.599	MERIDITH	SANFORD	1	RECREATION	D	.	.	.	.	35	1.64	33.37	0.95	C	2.94518	52370	85.8	1965	1972	7	31	A	9	.	1.473	0.671	Y	3	0.141	0
Changes in the Canadian River Fish Assemblage Associated with Reservoir Construction	Journal of Freshwater Ecology	2000	JOURNAL	Bonner, T. H., and G. R. Wilde	https://www.tandfonline.com/doi/abs/10.1080/02705060.2000.9663736#.U0Ku9rSurpc	3	B&W2000_1	4	3	3	4	T	Temperate_upland_rivers	US_Southern_Plains	USA	35°41'27.2"N	101°35'55.4	35.6909	-101.599	MERIDITH	SANFORD	1	RECREATION	D	.	.	.	.	35	1.64	33.37	0.95	C	2.94518	52370	85.8	1965	1990	25	31	A	12	.	1.879	0.756	Y	3.145	0.421	0
Changes in the Canadian River Fish Assemblage Associated with Reservoir Construction	Journal of Freshwater Ecology	2000	JOURNAL	Bonner, T. H., and G. R. Wilde	https://www.tandfonline.com/doi/abs/10.1080/02705060.2000.9663736#.U0Ku9rSurpc	3	B&W2000_1	4	4	4	4	T	Temperate_upland_rivers	US_Southern_Plains	USA	35°41'27.2"N	101°35'55.4	35.6909	-101.599	MERIDITH	SANFORD	1	RECREATION	D	.	.	.	.	35	1.64	33.37	0.95	C	2.94518	52370	85.8	1965	1996	31	31	A	12	.	1.129	0.454	Y	2.648	0.097	0
Upstream effects of a reservoir on fish assemblages 45 years following impoundment	Journal of Fish Biology	2013	JOURNAL	N. R. Franssen, M. Tobler	https://onlinelibrary.wiley.com/doi/abs/10.1111/jfb.12108	4	F&T2013	2	1	1	5	T	Temperate_upland_rivers	US_Southern_Plains	USA	35°13'12.4"N	97°15'28.2"W	35.2201	-97.2578	THUNDER	NORMAN	1	WATER_SUP	D	.	.	.	.	20.5	1.16	19.34	0.94	L	3.00402	663	22.1	1965	1962	-3	42	B	20	0	2.006	0.67	Y	2.822	0.685	0
Upstream effects of a reservoir on fish assemblages 45 years following impoundment	Journal of Fish Biology	2013	JOURNAL	N. R. Franssen, M. Tobler	https://onlinelibrary.wiley.com/doi/abs/10.1111/jfb.12108	4	F&T2013	2	2	2	5	T	Temperate_upland_rivers	US_Southern_Plains	USA	35°13'12.4"N	97°15'28.2"W	35.2201	-97.2578	THUNDER	NORMAN	1	WATER_SUP	D	.	.	.	.	20.5	1.16	19.34	0.94	L	3.00402	663	22.1	1965	2007	42	42	A	19	1	2.023	0.687	Y	3.13	0.983	0
Upstream effects of a reservoir on fish assemblages 45 years following impoundment	Journal of Fish Biology	2013	JOURNAL	N. R. Franssen, M. Tobler	https://onlinelibrary.wiley.com/doi/abs/10.1111/jfb.12108	4	F&T2013	2	3	1	6	T	Temperate_upland_rivers	US_Southern_Plains	USA	35°13'12.4"N	97°15'28.2"W	35.2201	-97.2578	THUNDER	NORMAN	2	WATER_SUP	UD	.	.	.	.	20.5	1.16	19.34	0.94	L	3.00402	663	22.1	1965	1962	-3	42	B	20	0	2.006	0.67	Y	2.822	0.685	0
Upstream effects of a reservoir on fish assemblages 45 years following impoundment	Journal of Fish Biology	2013	JOURNAL	N. R. Franssen, M. Tobler	https://onlinelibrary.wiley.com/doi/abs/10.1111/jfb.12108	4	F&T2013	2	4	2	6	T	Temperate_upland_rivers	US_Southern_Plains	USA	35°13'12.4"N	97°15'28.2"W	35.2201	-97.2578	THUNDER	NORMAN	2	WATER_SUP	UD	.	.	.	.	20.5	1.16	19.34	0.94	L	3.00402	663	22.1	1965	2007	42	42	A	15	1	1.91	0.705	Y	3.139	0.96	0
Long-term changes in a reservoir fish assemblage: stability in an unpredictable environment	Ecological Applications	2000	JOURNAL	Keith B. Gido, William J. Matthews, William C. Wolfinbarger	https://esajournals.onlinelibrary.wiley.com/doi/abs/10.1890/1051-0761%282000%29010%5B1517%3ALTCIAR%5D2.0.CO%3B2	5	GIDO2000	5	1	1	7	T	Temperate_upland_rivers	US_Southern_Plains	USA	33°53'39.3"N	96°40'30.7"W	33.8942	-96.6752	TEXOMA	DENISON	1	MULTI	UD	38.8	.	2	.	263.1	12.42	250.68	0.95	L	1.38244	102872	24.4	1943	1954	11	54	A	18	1	2.231	0.772	Y	3.243	0.91	0
Long-term changes in a reservoir fish assemblage: stability in an unpredictable environment	Ecological Applications	2000	JOURNAL	Keith B. Gido, William J. Matthews, William C. Wolfinbarger	https://esajournals.onlinelibrary.wiley.com/doi/abs/10.1890/1051-0761%282000%29010%5B1517%3ALTCIAR%5D2.0.CO%3B2	5	GIDO2000	5	2	2	7	T	Temperate_upland_rivers	US_Southern_Plains	USA	33°53'39.3"N	96°40'30.7"W	33.8942	-96.6752	TEXOMA	DENISON	1	MULTI	UD	38.8	.	2	.	263.1	12.42	250.68	0.95	L	1.38244	102872	24.4	1943	1982	39	54	A	20	3	2.189	0.731	Y	4.265	1.182	0
Long-term changes in a reservoir fish assemblage: stability in an unpredictable environment	Ecological Applications	2000	JOURNAL	Keith B. Gido, William J. Matthews, William C. Wolfinbarger	https://esajournals.onlinelibrary.wiley.com/doi/abs/10.1890/1051-0761%282000%29010%5B1517%3ALTCIAR%5D2.0.CO%3B2	5	GIDO2000	5	3	3	7	T	Temperate_upland_rivers	US_Southern_Plains	USA	33°53'39.3"N	96°40'30.7"W	33.8942	-96.6752	TEXOMA	DENISON	1	MULTI	UD	38.8	.	2	.	263.1	12.42	250.68	0.95	L	1.38244	102872	24.4	1943	1983	40	54	A	20	3	2.159	0.721	Y	4.078	1.154	0
Long-term changes in a reservoir fish assemblage: stability in an unpredictable environment	Ecological Applications	2000	JOURNAL	Keith B. Gido, William J. Matthews, William C. Wolfinbarger	https://esajournals.onlinelibrary.wiley.com/doi/abs/10.1890/1051-0761%282000%29010%5B1517%3ALTCIAR%5D2.0.CO%3B2	5	GIDO2000	5	4	4	7	T	Temperate_upland_rivers	US_Southern_Plains	USA	33°53'39.3"N	96°40'30.7"W	33.8942	-96.6752	TEXOMA	DENISON	1	MULTI	UD	38.8	.	2	.	263.1	12.42	250.68	0.95	L	1.38244	102872	24.4	1943	1996	53	54	A	20	3	1.825	0.609	Y	3.283	0.977	0
Long-term changes in a reservoir fish assemblage: stability in an unpredictable environment	Ecological Applications	2000	JOURNAL	Keith B. Gido, William J. Matthews, William C. Wolfinbarger	https://esajournals.onlinelibrary.wiley.com/doi/abs/10.1890/1051-0761%282000%29010%5B1517%3ALTCIAR%5D2.0.CO%3B2	5	GIDO2000	5	5	5	7	T	Temperate_upland_rivers	US_Southern_Plains	USA	33°53'39.3"N	96°40'30.7"W	33.8942	-96.6752	TEXOMA	DENISON	1	MULTI	UD	38.8	.	2	.	263.1	12.42	250.68	0.95	L	1.38244	102872	24.4	1943	1997	54	54	A	20	3	1.885	0.629	Y	3.241	0.964	0
Consequences of stream impoundment on fish communities in a small North American drainage	Regulated Rivers: Research & Management	2001	JOURNAL	Christopher A. Taylor, Jason H. Knouft, Tim M. Hiland	https://onlinelibrary.wiley.com/doi/abs/10.1002/rrr.629	6	TAYL2001	2	1	1	8	T	Temperate_floodplain_rivers_and_wetlands	Upper_Mississippi	USA	37°47'52.9"N	89°26'15.1"W	37.798	-89.4375	KINKAID	KINKAID	1	WATER_SUP	D	4.82	.	.	.	8.2	0.37	7.83	0.96	D	5.54382	161	23	1970	1959	-11	28	B	12	2	1.728	0.695	Y	3.782	1	0
Consequences of stream impoundment on fish communities in a small North American drainage	Regulated Rivers: Research & Management	2001	JOURNAL	Christopher A. Taylor, Jason H. Knouft, Tim M. Hiland	https://onlinelibrary.wiley.com/doi/abs/10.1002/rrr.629	6	TAYL2001	2	2	2	8	T	Temperate_floodplain_rivers_and_wetlands	Upper_Mississippi	USA	37°47'52.9"N	89°26'15.1"W	37.798	-89.4375	KINKAID	KINKAID	1	WATER_SUP	D	4.82	.	.	.	8.2	0.37	7.83	0.96	D	5.54382	161	23	1970	1998	28	28	A	16	6	2.451	0.884	Y	3.233	0.889	0
Consequences of stream impoundment on fish communities in a small North American drainage	Regulated Rivers: Research & Management	2001	JOURNAL	Christopher A. Taylor, Jason H. Knouft, Tim M. Hiland	https://onlinelibrary.wiley.com/doi/abs/10.1002/rrr.629	6	TAYL2001	2	3	1	9	T	Temperate_floodplain_rivers_and_wetlands	Upper_Mississippi	USA	37°47'52.9"N	89°26'15.1"W	37.798	-89.4375	KINKAID	KINKAID	2	WATER_SUP	UD	5.99	.	.	.	8.2	0.37	7.83	0.96	D	5.54382	161	23	1970	1959	-11	28	B	29	2	2.429	0.737	Y	2.921	0.753	0
Consequences of stream impoundment on fish communities in a small North American drainage	Regulated Rivers: Research & Management	2001	JOURNAL	Christopher A. Taylor, Jason H. Knouft, Tim M. Hiland	https://onlinelibrary.wiley.com/doi/abs/10.1002/rrr.629	6	TAYL2001	2	4	2	9	T	Temperate_floodplain_rivers_and_wetlands	Upper_Mississippi	USA	37°47'52.9"N	89°26'15.1"W	37.798	-89.4375	KINKAID	KINKAID	2	WATER_SUP	UD	5.99	.	.	.	8.2	0.37	7.83	0.96	D	5.54382	161	23	1970	1998	28	28	A	18	6	1.683	0.582	Y	3.23	1	0
Consequences of stream impoundment on fish communities in a small North American drainage	Regulated Rivers: Research & Management	2001	JOURNAL	Christopher A. Taylor, Jason H. Knouft, Tim M. Hiland	https://onlinelibrary.wiley.com/doi/abs/10.1002/rrr.629	6	TAYL2001	2	5	1	10	T	Temperate_floodplain_rivers_and_wetlands	Upper_Mississippi	USA	37°47'52.9"N	89°26'15.1"W	37.798	-89.4375	KINKAID	KINKAID	3	WATER_SUP	UR	18.38	.	.	.	8.2	0.37	7.83	0.96	D	5.54382	161	23	1970	1959	-11	28	B	19	2	2.124	0.766	Y	2.776	0.763	0
Consequences of stream impoundment on fish communities in a small North American drainage	Regulated Rivers: Research & Management	2001	JOURNAL	Christopher A. Taylor, Jason H. Knouft, Tim M. Hiland	https://onlinelibrary.wiley.com/doi/abs/10.1002/rrr.629	6	TAYL2001	2	6	2	10	T	Temperate_floodplain_rivers_and_wetlands	Upper_Mississippi	USA	37°47'52.9"N	89°26'15.1"W	37.798	-89.4375	KINKAID	KINKAID	3	WATER_SUP	UR	18.38	.	.	.	8.2	0.37	7.83	0.96	D	5.54382	161	23	1970	1998	28	28	A	21	6	2.187	0.718	Y	2.944	0.824	0
Consequences of stream impoundment on fish communities in a small North American drainage	Regulated Rivers: Research & Management	2001	JOURNAL	Christopher A. Taylor, Jason H. Knouft, Tim M. Hiland	https://onlinelibrary.wiley.com/doi/abs/10.1002/rrr.629	6	TAYL2001	2	7	1	11	T	Temperate_floodplain_rivers_and_wetlands	Upper_Mississippi	USA	37°47'52.9"N	89°26'15.1"W	37.798	-89.4375	KINKAID	KINKAID	3	WATER_SUP	.	.	.	.	.	8.2	0.37	7.83	0.96	D	5.54382	161	23	1970	1959	-11	28	B	49	2	.	.	N	.	.	0
Consequences of stream impoundment on fish communities in a small North American drainage	Regulated Rivers: Research & Management	2001	JOURNAL	Christopher A. Taylor, Jason H. Knouft, Tim M. Hiland	https://onlinelibrary.wiley.com/doi/abs/10.1002/rrr.629	6	TAYL2001	2	8	2	11	T	Temperate_floodplain_rivers_and_wetlands	Upper_Mississippi	USA	37°47'52.9"N	89°26'15.1"W	37.798	-89.4375	KINKAID	KINKAID	3	WATER_SUP	.	.	.	.	.	8.2	0.37	7.83	0.96	D	5.54382	161	23	1970	1998	28	28	A	74	6	.	.	N	.	.	0
Fish species composition before and after construction of a main stem reservoir on the White River, Colorado	Environmental Biology of Fishes	1994	JOURNAL	Patrick J. Martinez, Thomas E. Chart, Melissa A. Trammell, John G. Wullschleger, Eric P. Bergersen	https://rd.springer.com/article/10.1007/BF00002509	7	MART1994	3	1	1	12	T	Xeric_freshwaters_and_endorheic_(closed)_basins	Colorado	USA	40°06'53.5"N	108°42'36.4"W	40.1149	-108.71	KENNEY	TAYLOR	1	MULTI	UR	2	.	.	.	1.5	0.35	1.15	0.77	L	4.68892	7221	18.3	1984	1983	-1	6	B	11	4	1.391	0.58	Y	2.847	0.067	1
Fish species composition before and after construction of a main stem reservoir on the White River, Colorado	Environmental Biology of Fishes	1994	JOURNAL	Patrick J. Martinez, Thomas E. Chart, Melissa A. Trammell, John G. Wullschleger, Eric P. Bergersen	https://rd.springer.com/article/10.1007/BF00002509	7	MART1994	3	2	2	12	T	Xeric_freshwaters_and_endorheic_(closed)_basins	Colorado	USA	40°06'53.5"N	108°42'36.4"W	40.1149	-108.71	KENNEY	TAYLOR	1	MULTI	UR	2	.	.	.	1.5	0.35	1.15	0.77	L	4.68892	7221	18.3	1984	1984	0	6	A	10	4	1.372	0.596	Y	2.781	0.141	1
Fish species composition before and after construction of a main stem reservoir on the White River, Colorado	Environmental Biology of Fishes	1994	JOURNAL	Patrick J. Martinez, Thomas E. Chart, Melissa A. Trammell, John G. Wullschleger, Eric P. Bergersen	https://rd.springer.com/article/10.1007/BF00002509	7	MART1994	3	3	3	12	T	Xeric_freshwaters_and_endorheic_(closed)_basins	Colorado	USA	40°06'53.5"N	108°42'36.4"W	40.1149	-108.71	KENNEY	TAYLOR	1	MULTI	UR	2	.	.	.	1.5	0.35	1.15	0.77	L	4.68892	7221	18.3	1984	1985	1	6	A	12	5	1.503	0.605	Y	2.759	0.238	1
Fish species composition before and after construction of a main stem reservoir on the White River, Colorado	Environmental Biology of Fishes	1994	JOURNAL	Patrick J. Martinez, Thomas E. Chart, Melissa A. Trammell, John G. Wullschleger, Eric P. Bergersen	https://rd.springer.com/article/10.1007/BF00002509	7	MART1994	5	4	1	13	T	Xeric_freshwaters_and_endorheic_(closed)_basins	Colorado	USA	40°06'53.5"N	108°42'36.4"W	40.1149	-108.71	KENNEY	TAYLOR	2	MULTI	D	15.2	.	.	.	1.5	0.35	1.15	0.77	L	4.68892	7221	18.3	1984	1983	-1	6	B	12	5	1.486	0.598	Y	2.88	0.228	1
Fish species composition before and after construction of a main stem reservoir on the White River, Colorado	Environmental Biology of Fishes	1994	JOURNAL	Patrick J. Martinez, Thomas E. Chart, Melissa A. Trammell, John G. Wullschleger, Eric P. Bergersen	https://rd.springer.com/article/10.1007/BF00002509	7	MART1994	5	5	2	13	T	Xeric_freshwaters_and_endorheic_(closed)_basins	Colorado	USA	40°06'53.5"N	108°42'36.4"W	40.1149	-108.71	KENNEY	TAYLOR	2	MULTI	D	15.2	.	.	.	1.5	0.35	1.15	0.77	L	4.68892	7221	18.3	1984	1984	0	6	A	11	5	1.713	0.714	Y	2.74	0.338	1
Fish species composition before and after construction of a main stem reservoir on the White River, Colorado	Environmental Biology of Fishes	1994	JOURNAL	Patrick J. Martinez, Thomas E. Chart, Melissa A. Trammell, John G. Wullschleger, Eric P. Bergersen	https://rd.springer.com/article/10.1007/BF00002509	7	MART1994	5	6	3	13	T	Xeric_freshwaters_and_endorheic_(closed)_basins	Colorado	USA	40°06'53.5"N	108°42'36.4"W	40.1149	-108.71	KENNEY	TAYLOR	2	MULTI	D	15.2	.	.	.	1.5	0.35	1.15	0.77	L	4.68892	7221	18.3	1984	1985	1	6	A	14	7	1.533	0.598	Y	2.753	0.271	1
Fish species composition before and after construction of a main stem reservoir on the White River, Colorado	Environmental Biology of Fishes	1994	JOURNAL	Patrick J. Martinez, Thomas E. Chart, Melissa A. Trammell, John G. Wullschleger, Eric P. Bergersen	https://rd.springer.com/article/10.1007/BF00002509	7	MART1994	5	7	4	13	T	Xeric_freshwaters_and_endorheic_(closed)_basins	Colorado	USA	40°06'53.5"N	108°42'36.4"W	40.1149	-108.71	KENNEY	TAYLOR	2	MULTI	D	15.2	.	.	.	1.5	0.35	1.15	0.77	L	4.68892	7221	18.3	1984	1989	5	6	A	17	10	1.44	0.508	Y	2.684	0.37	1
Fish species composition before and after construction of a main stem reservoir on the White River, Colorado	Environmental Biology of Fishes	1994	JOURNAL	Patrick J. Martinez, Thomas E. Chart, Melissa A. Trammell, John G. Wullschleger, Eric P. Bergersen	https://rd.springer.com/article/10.1007/BF00002509	7	MART1994	5	8	5	13	T	Xeric_freshwaters_and_endorheic_(closed)_basins	Colorado	USA	40°06'53.5"N	108°42'36.4"W	40.1149	-108.71	KENNEY	TAYLOR	2	MULTI	D	15.2	.	.	.	1.5	0.35	1.15	0.77	L	4.68892	7221	18.3	1984	1990	6	6	A	14	8	1.587	0.601	Y	2.732	0.396	1
Fish species composition before and after construction of a main stem reservoir on the White River, Colorado	Environmental Biology of Fishes	1994	JOURNAL	Patrick J. Martinez, Thomas E. Chart, Melissa A. Trammell, John G. Wullschleger, Eric P. Bergersen	https://rd.springer.com/article/10.1007/BF00002509	7	MART1994	7	9	1	14	T	Xeric_freshwaters_and_endorheic_(closed)_basins	Colorado	USA	40°06'53.5"N	108°42'36.4"W	40.1149	-108.71	KENNEY	TAYLOR	2	MULTI	UD	0.25	.	.	.	1.5	0.35	1.15	0.77	L	4.68892	7221	18.3	1984	1983	-1	6	B	6	2	1.383	0.577	Y	2.847	0.125	1
Fish species composition before and after construction of a main stem reservoir on the White River, Colorado	Environmental Biology of Fishes	1994	JOURNAL	Patrick J. Martinez, Thomas E. Chart, Melissa A. Trammell, John G. Wullschleger, Eric P. Bergersen	https://rd.springer.com/article/10.1007/BF00002509	7	MART1994	7	10	2	14	T	Xeric_freshwaters_and_endorheic_(closed)_basins	Colorado	USA	40°06'53.5"N	108°42'36.4"W	40.1149	-108.71	KENNEY	TAYLOR	2	MULTI	UD	0.25	.	.	.	1.5	0.35	1.15	0.77	L	4.68892	7221	18.3	1984	1984	0	6	A	6	2	1.618	0.703	Y	2.801	0.177	1
Fish species composition before and after construction of a main stem reservoir on the White River, Colorado	Environmental Biology of Fishes	1994	JOURNAL	Patrick J. Martinez, Thomas E. Chart, Melissa A. Trammell, John G. Wullschleger, Eric P. Bergersen	https://rd.springer.com/article/10.1007/BF00002509	7	MART1994	7	11	3	14	T	Xeric_freshwaters_and_endorheic_(closed)_basins	Colorado	USA	40°06'53.5"N	108°42'36.4"W	40.1149	-108.71	KENNEY	TAYLOR	2	MULTI	UD	0.25	.	.	.	1.5	0.35	1.15	0.77	L	4.68892	7221	18.3	1984	1985	1	6	A	9	4	1.272	0.512	Y	2.568	0.632	1
Fish species composition before and after construction of a main stem reservoir on the White River, Colorado	Environmental Biology of Fishes	1994	JOURNAL	Patrick J. Martinez, Thomas E. Chart, Melissa A. Trammell, John G. Wullschleger, Eric P. Bergersen	https://rd.springer.com/article/10.1007/BF00002509	7	MART1994	7	12	4	14	T	Xeric_freshwaters_and_endorheic_(closed)_basins	Colorado	USA	40°06'53.5"N	108°42'36.4"W	40.1149	-108.71	KENNEY	TAYLOR	2	MULTI	UD	0.25	.	.	.	1.5	0.35	1.15	0.77	L	4.68892	7221	18.3	1984	1987	3	6	A	11	7	2.109	0.849	Y	2.857	0.638	1
Fish species composition before and after construction of a main stem reservoir on the White River, Colorado	Environmental Biology of Fishes	1994	JOURNAL	Patrick J. Martinez, Thomas E. Chart, Melissa A. Trammell, John G. Wullschleger, Eric P. Bergersen	https://rd.springer.com/article/10.1007/BF00002509	7	MART1994	7	13	5	14	T	Xeric_freshwaters_and_endorheic_(closed)_basins	Colorado	USA	40°06'53.5"N	108°42'36.4"W	40.1149	-108.71	KENNEY	TAYLOR	2	MULTI	UD	0.25	.	.	.	1.5	0.35	1.15	0.77	L	4.68892	7221	18.3	1984	1988	4	6	A	16	10	1.906	0.795	Y	2.85	0.725	1
Fish species composition before and after construction of a main stem reservoir on the White River, Colorado	Environmental Biology of Fishes	1994	JOURNAL	Patrick J. Martinez, Thomas E. Chart, Melissa A. Trammell, John G. Wullschleger, Eric P. Bergersen	https://rd.springer.com/article/10.1007/BF00002509	7	MART1994	7	14	6	14	T	Xeric_freshwaters_and_endorheic_(closed)_basins	Colorado	USA	40°06'53.5"N	108°42'36.4"W	40.1149	-108.71	KENNEY	TAYLOR	2	MULTI	UD	0.25	.	.	.	1.5	0.35	1.15	0.77	L	4.68892	7221	18.3	1984	1989	5	6	A	15	9	0.959	0.364	Y	2.517	0.884	1
Fish species composition before and after construction of a main stem reservoir on the White River, Colorado	Environmental Biology of Fishes	1994	JOURNAL	Patrick J. Martinez, Thomas E. Chart, Melissa A. Trammell, John G. Wullschleger, Eric P. Bergersen	https://rd.springer.com/article/10.1007/BF00002509	7	MART1994	7	15	7	14	T	Xeric_freshwaters_and_endorheic_(closed)_basins	Colorado	USA	40°06'53.5"N	108°42'36.4"W	40.1149	-108.71	KENNEY	TAYLOR	2	MULTI	UD	0.25	.	.	.	1.5	0.35	1.15	0.77	L	4.68892	7221	18.3	1984	1990	6	6	A	15	9	1.189	0.42	Y	2.682	0.932	1
Species changes in reservoir fisheries following impoundment: the case of Lake Itezhi-tezhi, Zambia	Book: The Impact of Species Changes in African Lakes	1995	BOOK	Ian G. Cowx, Cyprian K. Kapasa	https://rd.springer.com/chapter/10.1007%2F978-94-011-0563-7_15	8	C&K1995	6	1	1	15	TR	Tropical_and_subtropical_floodplain_rivers_and_wetland_complexes	Kafue	ZAMBIA	15°47'46.5"S	25°55'20.9"E	-15.7962	25.9225	ITEZHI-TEZHI	ITEZHI-TEZHI	1	HYDRO	UD	.	.	4	13	328.5	9.59	318.92	0.97	L	0.796683	106966	17.4	1977	1971	-6	8	B	56	.	.	.	N	.	.	0
Species changes in reservoir fisheries following impoundment: the case of Lake Itezhi-tezhi, Zambia	Book: The Impact of Species Changes in African Lakes	1995	BOOK	Ian G. Cowx, Cyprian K. Kapasa	https://rd.springer.com/chapter/10.1007%2F978-94-011-0563-7_15	8	C&K1995	6	2	2	15	TR	Tropical_and_subtropical_floodplain_rivers_and_wetland_complexes	Kafue	ZAMBIA	15°47'46.5"S	25°55'20.9"E	-15.7962	25.9225	ITEZHI-TEZHI	ITEZHI-TEZHI	1	HYDRO	UD	.	.	4	13	328.5	9.59	318.92	0.97	L	0.796683	106966	17.4	1977	1981	4	8	A	24	.	1.922	0.613	Y	3.288	0.983	0
Species changes in reservoir fisheries following impoundment: the case of Lake Itezhi-tezhi, Zambia	Book: The Impact of Species Changes in African Lakes	1995	BOOK	Ian G. Cowx, Cyprian K. Kapasa	https://rd.springer.com/chapter/10.1007%2F978-94-011-0563-7_15	8	C&K1995	6	3	3	15	TR	Tropical_and_subtropical_floodplain_rivers_and_wetland_complexes	Kafue	ZAMBIA	15°47'46.5"S	25°55'20.9"E	-15.7962	25.9225	ITEZHI-TEZHI	ITEZHI-TEZHI	1	HYDRO	UD	.	.	4	13	328.5	9.59	318.92	0.97	L	0.796683	106966	17.4	1977	1982	5	8	A	19	.	2.164	0.735	Y	3.255	0.962	0
Species changes in reservoir fisheries following impoundment: the case of Lake Itezhi-tezhi, Zambia	Book: The Impact of Species Changes in African Lakes	1995	BOOK	Ian G. Cowx, Cyprian K. Kapasa	https://rd.springer.com/chapter/10.1007%2F978-94-011-0563-7_15	8	C&K1995	6	4	4	15	TR	Tropical_and_subtropical_floodplain_rivers_and_wetland_complexes	Kafue	ZAMBIA	15°47'46.5"S	25°55'20.9"E	-15.7962	25.9225	ITEZHI-TEZHI	ITEZHI-TEZHI	1	HYDRO	UD	.	.	4	13	328.5	9.59	318.92	0.97	L	0.796683	106966	17.4	1977	1983	6	8	A	18	.	2.269	0.785	Y	3.261	0.952	0
Species changes in reservoir fisheries following impoundment: the case of Lake Itezhi-tezhi, Zambia	Book: The Impact of Species Changes in African Lakes	1995	BOOK	Ian G. Cowx, Cyprian K. Kapasa	https://rd.springer.com/chapter/10.1007%2F978-94-011-0563-7_15	8	C&K1995	6	5	5	15	TR	Tropical_and_subtropical_floodplain_rivers_and_wetland_complexes	Kafue	ZAMBIA	15°47'46.5"S	25°55'20.9"E	-15.7962	25.9225	ITEZHI-TEZHI	ITEZHI-TEZHI	1	HYDRO	UD	.	.	4	13	328.5	9.59	318.92	0.97	L	0.796683	106966	17.4	1977	1984	7	8	A	16	.	1.874	0.692	Y	3.211	0.992	0
Species changes in reservoir fisheries following impoundment: the case of Lake Itezhi-tezhi, Zambia	Book: The Impact of Species Changes in African Lakes	1995	BOOK	Ian G. Cowx, Cyprian K. Kapasa	https://rd.springer.com/chapter/10.1007%2F978-94-011-0563-7_15	8	C&K1995	6	6	6	15	TR	Tropical_and_subtropical_floodplain_rivers_and_wetland_complexes	Kafue	ZAMBIA	15°47'46.5"S	25°55'20.9"E	-15.7962	25.9225	ITEZHI-TEZHI	ITEZHI-TEZHI	1	HYDRO	UD	.	.	4	13	328.5	9.59	318.92	0.97	L	0.796683	106966	17.4	1977	1985	8	8	A	23	.	2.024	0.665	Y	3.122	0.628	0
An analysis of fish distribution in Kainji lake Nigeria	Hydrobiologia	1978	JOURNAL	E. O. Ita	https://rd.springer.com/article/10.1007/BF02346958	9	ITA1978	2	1	1	16	TR	Tropical_and_subtropical_floodplain_rivers_and_wetland_complexes	Lower_Niger-Benue	NIGERIA	10°21'38.0"N	4°36'17.1"E	10.3606	4.60474	KAINJI	KAINJI	1	HYDRO	UD	.	.	.	.	1034.8	119.9	914.9	0.88	L	0.549838	1571130	14.5	1968	1966	-2	8	B	120	.	.	.	N	.	.	0
An analysis of fish distribution in Kainji lake Nigeria	Hydrobiologia	1978	JOURNAL	E. O. Ita	https://rd.springer.com/article/10.1007/BF02346958	9	ITA1978	2	2	2	16	TR	Tropical_and_subtropical_floodplain_rivers_and_wetland_complexes	Lower_Niger-Benue	NIGERIA	10°21'38.0"N	4°36'17.1"E	10.3606	4.60474	KAINJI	KAINJI	1	HYDRO	UD	.	.	.	.	1034.8	119.9	914.9	0.88	L	0.549838	1571130	14.5	1968	1976	8	8	A	97	.	.	.	Y	.	.	0
Long-term development of fish populations in the Římov Reservoir	Fisheries Management and Ecology	2009	JOURNAL	M. ŘÍHA, J. KUBEČKA, M. VAŠEK, J. SE?A, T. MRKVIČKA, M. PRCHALOVÁ, J. MATĒNA, M. HLADÍK, M. ČECH, V. DRAŠTÍK, J. FROUZOVÁ, E. HOHAUSOVÁ , O. JAROLÍM, T. JŮZA, M. KRATOCHVÍL, J. PETERKA, M. TUŠER	https://onlinelibrary.wiley.com/doi/full/10.1111/j.1365-2400.2008.00650.x	10	RIHA2009	21	1	1	17	T	Temperate_floodplain_rivers_and_wetlands	Central_and_western_Europe	CZECH_R.	48°50'03.9"N	14°28'59.1"E	48.8344	14.4831	RIMOV	RIMOV	1	WATER_SUP	UD	.	.	.	.	1.3	0.33	0.97	0.74	L	8.97308	482	25.8	1978	1978	0	28	F	15	.	1.8	0.665	N	.	.	0
Long-term development of fish populations in the Římov Reservoir	Fisheries Management and Ecology	2009	JOURNAL	M. ŘÍHA, J. KUBEČKA, M. VAŠEK, J. SE?A, T. MRKVIČKA, M. PRCHALOVÁ, J. MATĒNA, M. HLADÍK, M. ČECH, V. DRAŠTÍK, J. FROUZOVÁ, E. HOHAUSOVÁ , O. JAROLÍM, T. JŮZA, M. KRATOCHVÍL, J. PETERKA, M. TUŠER	https://onlinelibrary.wiley.com/doi/full/10.1111/j.1365-2400.2008.00650.x	10	RIHA2009	21	2	2	17	T	Temperate_floodplain_rivers_and_wetlands	Central_and_western_Europe	CZECH_R.	48°50'03.9"N	14°28'59.1"E	48.8344	14.4831	RIMOV	RIMOV	1	WATER_SUP	UD	.	.	.	.	1.3	0.33	0.97	0.74	L	8.97308	482	25.8	1978	1985	7	28	A	15	.	0.783	0.29	N	.	.	0
Long-term development of fish populations in the Římov Reservoir	Fisheries Management and Ecology	2009	JOURNAL	M. ŘÍHA, J. KUBEČKA, M. VAŠEK, J. SE?A, T. MRKVIČKA, M. PRCHALOVÁ, J. MATĒNA, M. HLADÍK, M. ČECH, V. DRAŠTÍK, J. FROUZOVÁ, E. HOHAUSOVÁ , O. JAROLÍM, T. JŮZA, M. KRATOCHVÍL, J. PETERKA, M. TUŠER	https://onlinelibrary.wiley.com/doi/full/10.1111/j.1365-2400.2008.00650.x	10	RIHA2009	21	3	3	17	T	Temperate_floodplain_rivers_and_wetlands	Central_and_western_Europe	CZECH_R.	48°50'03.9"N	14°28'59.1"E	48.8344	14.4831	RIMOV	RIMOV	1	WATER_SUP	UD	.	.	.	.	1.3	0.33	0.97	0.74	L	8.97308	482	25.8	1978	1986	8	28	A	12	.	0.722	0.291	N	.	.	0
Long-term development of fish populations in the Římov Reservoir	Fisheries Management and Ecology	2009	JOURNAL	M. ŘÍHA, J. KUBEČKA, M. VAŠEK, J. SE?A, T. MRKVIČKA, M. PRCHALOVÁ, J. MATĒNA, M. HLADÍK, M. ČECH, V. DRAŠTÍK, J. FROUZOVÁ, E. HOHAUSOVÁ , O. JAROLÍM, T. JŮZA, M. KRATOCHVÍL, J. PETERKA, M. TUŠER	https://onlinelibrary.wiley.com/doi/full/10.1111/j.1365-2400.2008.00650.x	10	RIHA2009	21	4	4	17	T	Temperate_floodplain_rivers_and_wetlands	Central_and_western_Europe	CZECH_R.	48°50'03.9"N	14°28'59.1"E	48.8344	14.4831	RIMOV	RIMOV	1	WATER_SUP	UD	.	.	.	.	1.3	0.33	0.97	0.74	L	8.97308	482	25.8	1978	1987	9	28	A	11	.	0.919	0.384	N	.	.	0
Long-term development of fish populations in the Římov Reservoir	Fisheries Management and Ecology	2009	JOURNAL	M. ŘÍHA, J. KUBEČKA, M. VAŠEK, J. SE?A, T. MRKVIČKA, M. PRCHALOVÁ, J. MATĒNA, M. HLADÍK, M. ČECH, V. DRAŠTÍK, J. FROUZOVÁ, E. HOHAUSOVÁ , O. JAROLÍM, T. JŮZA, M. KRATOCHVÍL, J. PETERKA, M. TUŠER	https://onlinelibrary.wiley.com/doi/full/10.1111/j.1365-2400.2008.00650.x	10	RIHA2009	21	5	5	17	T	Temperate_floodplain_rivers_and_wetlands	Central_and_western_Europe	CZECH_R.	48°50'03.9"N	14°28'59.1"E	48.8344	14.4831	RIMOV	RIMOV	1	WATER_SUP	UD	.	.	.	.	1.3	0.33	0.97	0.74	L	8.97308	482	25.8	1978	1988	10	28	A	15	.	1.445	0.533	N	.	.	0
Long-term development of fish populations in the Římov Reservoir	Fisheries Management and Ecology	2009	JOURNAL	M. ŘÍHA, J. KUBEČKA, M. VAŠEK, J. SE?A, T. MRKVIČKA, M. PRCHALOVÁ, J. MATĒNA, M. HLADÍK, M. ČECH, V. DRAŠTÍK, J. FROUZOVÁ, E. HOHAUSOVÁ , O. JAROLÍM, T. JŮZA, M. KRATOCHVÍL, J. PETERKA, M. TUŠER	https://onlinelibrary.wiley.com/doi/full/10.1111/j.1365-2400.2008.00650.x	10	RIHA2009	21	6	6	17	T	Temperate_floodplain_rivers_and_wetlands	Central_and_western_Europe	CZECH_R.	48°50'03.9"N	14°28'59.1"E	48.8344	14.4831	RIMOV	RIMOV	1	WATER_SUP	UD	.	.	.	.	1.3	0.33	0.97	0.74	L	8.97308	482	25.8	1978	1989	11	28	A	14	.	1.365	0.519	N	.	.	0
Long-term development of fish populations in the Římov Reservoir	Fisheries Management and Ecology	2009	JOURNAL	M. ŘÍHA, J. KUBEČKA, M. VAŠEK, J. SE?A, T. MRKVIČKA, M. PRCHALOVÁ, J. MATĒNA, M. HLADÍK, M. ČECH, V. DRAŠTÍK, J. FROUZOVÁ, E. HOHAUSOVÁ , O. JAROLÍM, T. JŮZA, M. KRATOCHVÍL, J. PETERKA, M. TUŠER	https://onlinelibrary.wiley.com/doi/full/10.1111/j.1365-2400.2008.00650.x	10	RIHA2009	21	7	7	17	T	Temperate_floodplain_rivers_and_wetlands	Central_and_western_Europe	CZECH_R.	48°50'03.9"N	14°28'59.1"E	48.8344	14.4831	RIMOV	RIMOV	1	WATER_SUP	UD	.	.	.	.	1.3	0.33	0.97	0.74	L	8.97308	482	25.8	1978	1991	13	28	A	13	.	0.864	0.338	N	.	.	0
Long-term development of fish populations in the Římov Reservoir	Fisheries Management and Ecology	2009	JOURNAL	M. ŘÍHA, J. KUBEČKA, M. VAŠEK, J. SE?A, T. MRKVIČKA, M. PRCHALOVÁ, J. MATĒNA, M. HLADÍK, M. ČECH, V. DRAŠTÍK, J. FROUZOVÁ, E. HOHAUSOVÁ , O. JAROLÍM, T. JŮZA, M. KRATOCHVÍL, J. PETERKA, M. TUŠER	https://onlinelibrary.wiley.com/doi/full/10.1111/j.1365-2400.2008.00650.x	10	RIHA2009	21	8	8	17	T	Temperate_floodplain_rivers_and_wetlands	Central_and_western_Europe	CZECH_R.	48°50'03.9"N	14°28'59.1"E	48.8344	14.4831	RIMOV	RIMOV	1	WATER_SUP	UD	.	.	.	.	1.3	0.33	0.97	0.74	L	8.97308	482	25.8	1978	1992	14	28	A	12	.	0.851	0.343	N	.	.	0
Long-term development of fish populations in the Římov Reservoir	Fisheries Management and Ecology	2009	JOURNAL	M. ŘÍHA, J. KUBEČKA, M. VAŠEK, J. SE?A, T. MRKVIČKA, M. PRCHALOVÁ, J. MATĒNA, M. HLADÍK, M. ČECH, V. DRAŠTÍK, J. FROUZOVÁ, E. HOHAUSOVÁ , O. JAROLÍM, T. JŮZA, M. KRATOCHVÍL, J. PETERKA, M. TUŠER	https://onlinelibrary.wiley.com/doi/full/10.1111/j.1365-2400.2008.00650.x	10	RIHA2009	21	9	9	17	T	Temperate_floodplain_rivers_and_wetlands	Central_and_western_Europe	CZECH_R.	48°50'03.9"N	14°28'59.1"E	48.8344	14.4831	RIMOV	RIMOV	1	WATER_SUP	UD	.	.	.	.	1.3	0.33	0.97	0.74	L	8.97308	482	25.8	1978	1993	15	28	A	9	.	0.923	0.421	N	.	.	0
Long-term development of fish populations in the Římov Reservoir	Fisheries Management and Ecology	2009	JOURNAL	M. ŘÍHA, J. KUBEČKA, M. VAŠEK, J. SE?A, T. MRKVIČKA, M. PRCHALOVÁ, J. MATĒNA, M. HLADÍK, M. ČECH, V. DRAŠTÍK, J. FROUZOVÁ, E. HOHAUSOVÁ , O. JAROLÍM, T. JŮZA, M. KRATOCHVÍL, J. PETERKA, M. TUŠER	https://onlinelibrary.wiley.com/doi/full/10.1111/j.1365-2400.2008.00650.x	10	RIHA2009	21	10	10	17	T	Temperate_floodplain_rivers_and_wetlands	Central_and_western_Europe	CZECH_R.	48°50'03.9"N	14°28'59.1"E	48.8344	14.4831	RIMOV	RIMOV	1	WATER_SUP	UD	.	.	.	.	1.3	0.33	0.97	0.74	L	8.97308	482	25.8	1978	1994	16	28	A	12	.	0.968	0.39	N	.	.	0
Long-term development of fish populations in the Římov Reservoir	Fisheries Management and Ecology	2009	JOURNAL	M. ŘÍHA, J. KUBEČKA, M. VAŠEK, J. SE?A, T. MRKVIČKA, M. PRCHALOVÁ, J. MATĒNA, M. HLADÍK, M. ČECH, V. DRAŠTÍK, J. FROUZOVÁ, E. HOHAUSOVÁ , O. JAROLÍM, T. JŮZA, M. KRATOCHVÍL, J. PETERKA, M. TUŠER	https://onlinelibrary.wiley.com/doi/full/10.1111/j.1365-2400.2008.00650.x	10	RIHA2009	21	11	11	17	T	Temperate_floodplain_rivers_and_wetlands	Central_and_western_Europe	CZECH_R.	48°50'03.9"N	14°28'59.1"E	48.8344	14.4831	RIMOV	RIMOV	1	WATER_SUP	UD	.	.	.	.	1.3	0.33	0.97	0.74	L	8.97308	482	25.8	1978	1995	17	28	A	12	.	1.143	0.461	N	.	.	0
Long-term development of fish populations in the Římov Reservoir	Fisheries Management and Ecology	2009	JOURNAL	M. ŘÍHA, J. KUBEČKA, M. VAŠEK, J. SE?A, T. MRKVIČKA, M. PRCHALOVÁ, J. MATĒNA, M. HLADÍK, M. ČECH, V. DRAŠTÍK, J. FROUZOVÁ, E. HOHAUSOVÁ , O. JAROLÍM, T. JŮZA, M. KRATOCHVÍL, J. PETERKA, M. TUŠER	https://onlinelibrary.wiley.com/doi/full/10.1111/j.1365-2400.2008.00650.x	10	RIHA2009	21	12	12	17	T	Temperate_floodplain_rivers_and_wetlands	Central_and_western_Europe	CZECH_R.	48°50'03.9"N	14°28'59.1"E	48.8344	14.4831	RIMOV	RIMOV	1	WATER_SUP	UD	.	.	.	.	1.3	0.33	0.97	0.74	L	8.97308	482	25.8	1978	1996	18	28	A	12	.	1.308	0.527	N	.	.	0
Long-term development of fish populations in the Římov Reservoir	Fisheries Management and Ecology	2009	JOURNAL	M. ŘÍHA, J. KUBEČKA, M. VAŠEK, J. SE?A, T. MRKVIČKA, M. PRCHALOVÁ, J. MATĒNA, M. HLADÍK, M. ČECH, V. DRAŠTÍK, J. FROUZOVÁ, E. HOHAUSOVÁ , O. JAROLÍM, T. JŮZA, M. KRATOCHVÍL, J. PETERKA, M. TUŠER	https://onlinelibrary.wiley.com/doi/full/10.1111/j.1365-2400.2008.00650.x	10	RIHA2009	21	13	13	17	T	Temperate_floodplain_rivers_and_wetlands	Central_and_western_Europe	CZECH_R.	48°50'03.9"N	14°28'59.1"E	48.8344	14.4831	RIMOV	RIMOV	1	WATER_SUP	UD	.	.	.	.	1.3	0.33	0.97	0.74	L	8.97308	482	25.8	1978	1997	19	28	A	14	.	1.614	0.611	N	.	.	0
Long-term development of fish populations in the Římov Reservoir	Fisheries Management and Ecology	2009	JOURNAL	M. ŘÍHA, J. KUBEČKA, M. VAŠEK, J. SE?A, T. MRKVIČKA, M. PRCHALOVÁ, J. MATĒNA, M. HLADÍK, M. ČECH, V. DRAŠTÍK, J. FROUZOVÁ, E. HOHAUSOVÁ , O. JAROLÍM, T. JŮZA, M. KRATOCHVÍL, J. PETERKA, M. TUŠER	https://onlinelibrary.wiley.com/doi/full/10.1111/j.1365-2400.2008.00650.x	10	RIHA2009	21	14	14	17	T	Temperate_floodplain_rivers_and_wetlands	Central_and_western_Europe	CZECH_R.	48°50'03.9"N	14°28'59.1"E	48.8344	14.4831	RIMOV	RIMOV	1	WATER_SUP	UD	.	.	.	.	1.3	0.33	0.97	0.74	L	8.97308	482	25.8	1978	1998	20	28	A	12	.	1.301	0.523	N	.	.	0
Long-term development of fish populations in the Římov Reservoir	Fisheries Management and Ecology	2009	JOURNAL	M. ŘÍHA, J. KUBEČKA, M. VAŠEK, J. SE?A, T. MRKVIČKA, M. PRCHALOVÁ, J. MATĒNA, M. HLADÍK, M. ČECH, V. DRAŠTÍK, J. FROUZOVÁ, E. HOHAUSOVÁ , O. JAROLÍM, T. JŮZA, M. KRATOCHVÍL, J. PETERKA, M. TUŠER	https://onlinelibrary.wiley.com/doi/full/10.1111/j.1365-2400.2008.00650.x	10	RIHA2009	21	15	15	17	T	Temperate_floodplain_rivers_and_wetlands	Central_and_western_Europe	CZECH_R.	48°50'03.9"N	14°28'59.1"E	48.8344	14.4831	RIMOV	RIMOV	1	WATER_SUP	UD	.	.	.	.	1.3	0.33	0.97	0.74	L	8.97308	482	25.8	1978	1999	21	28	A	10	.	1.559	0.67	N	.	.	0
Long-term development of fish populations in the Římov Reservoir	Fisheries Management and Ecology	2009	JOURNAL	M. ŘÍHA, J. KUBEČKA, M. VAŠEK, J. SE?A, T. MRKVIČKA, M. PRCHALOVÁ, J. MATĒNA, M. HLADÍK, M. ČECH, V. DRAŠTÍK, J. FROUZOVÁ, E. HOHAUSOVÁ , O. JAROLÍM, T. JŮZA, M. KRATOCHVÍL, J. PETERKA, M. TUŠER	https://onlinelibrary.wiley.com/doi/full/10.1111/j.1365-2400.2008.00650.x	10	RIHA2009	21	16	16	17	T	Temperate_floodplain_rivers_and_wetlands	Central_and_western_Europe	CZECH_R.	48°50'03.9"N	14°28'59.1"E	48.8344	14.4831	RIMOV	RIMOV	1	WATER_SUP	UD	.	.	.	.	1.3	0.33	0.97	0.74	L	8.97308	482	25.8	1978	2000	22	28	A	11	.	1.4	0.584	N	.	.	0
Long-term development of fish populations in the Římov Reservoir	Fisheries Management and Ecology	2009	JOURNAL	M. ŘÍHA, J. KUBEČKA, M. VAŠEK, J. SE?A, T. MRKVIČKA, M. PRCHALOVÁ, J. MATĒNA, M. HLADÍK, M. ČECH, V. DRAŠTÍK, J. FROUZOVÁ, E. HOHAUSOVÁ , O. JAROLÍM, T. JŮZA, M. KRATOCHVÍL, J. PETERKA, M. TUŠER	https://onlinelibrary.wiley.com/doi/full/10.1111/j.1365-2400.2008.00650.x	10	RIHA2009	21	17	17	17	T	Temperate_floodplain_rivers_and_wetlands	Central_and_western_Europe	CZECH_R.	48°50'03.9"N	14°28'59.1"E	48.8344	14.4831	RIMOV	RIMOV	1	WATER_SUP	UD	.	.	.	.	1.3	0.33	0.97	0.74	L	8.97308	482	25.8	1978	2001	23	28	A	12	.	1.28	0.516	N	.	.	0
Long-term development of fish populations in the Římov Reservoir	Fisheries Management and Ecology	2009	JOURNAL	M. ŘÍHA, J. KUBEČKA, M. VAŠEK, J. SE?A, T. MRKVIČKA, M. PRCHALOVÁ, J. MATĒNA, M. HLADÍK, M. ČECH, V. DRAŠTÍK, J. FROUZOVÁ, E. HOHAUSOVÁ , O. JAROLÍM, T. JŮZA, M. KRATOCHVÍL, J. PETERKA, M. TUŠER	https://onlinelibrary.wiley.com/doi/full/10.1111/j.1365-2400.2008.00650.x	10	RIHA2009	21	18	18	17	T	Temperate_floodplain_rivers_and_wetlands	Central_and_western_Europe	CZECH_R.	48°50'03.9"N	14°28'59.1"E	48.8344	14.4831	RIMOV	RIMOV	1	WATER_SUP	UD	.	.	.	.	1.3	0.33	0.97	0.74	L	8.97308	482	25.8	1978	2002	24	28	A	10	.	1.151	0.503	N	.	.	0
Long-term development of fish populations in the Římov Reservoir	Fisheries Management and Ecology	2009	JOURNAL	M. ŘÍHA, J. KUBEČKA, M. VAŠEK, J. SE?A, T. MRKVIČKA, M. PRCHALOVÁ, J. MATĒNA, M. HLADÍK, M. ČECH, V. DRAŠTÍK, J. FROUZOVÁ, E. HOHAUSOVÁ , O. JAROLÍM, T. JŮZA, M. KRATOCHVÍL, J. PETERKA, M. TUŠER	https://onlinelibrary.wiley.com/doi/full/10.1111/j.1365-2400.2008.00650.x	10	RIHA2009	21	19	19	17	T	Temperate_floodplain_rivers_and_wetlands	Central_and_western_Europe	CZECH_R.	48°50'03.9"N	14°28'59.1"E	48.8344	14.4831	RIMOV	RIMOV	1	WATER_SUP	UD	.	.	.	.	1.3	0.33	0.97	0.74	L	8.97308	482	25.8	1978	2004	26	28	A	12	.	1.445	0.582	N	.	.	0
Long-term development of fish populations in the Římov Reservoir	Fisheries Management and Ecology	2009	JOURNAL	M. ŘÍHA, J. KUBEČKA, M. VAŠEK, J. SE?A, T. MRKVIČKA, M. PRCHALOVÁ, J. MATĒNA, M. HLADÍK, M. ČECH, V. DRAŠTÍK, J. FROUZOVÁ, E. HOHAUSOVÁ , O. JAROLÍM, T. JŮZA, M. KRATOCHVÍL, J. PETERKA, M. TUŠER	https://onlinelibrary.wiley.com/doi/full/10.1111/j.1365-2400.2008.00650.x	10	RIHA2009	21	20	20	17	T	Temperate_floodplain_rivers_and_wetlands	Central_and_western_Europe	CZECH_R.	48°50'03.9"N	14°28'59.1"E	48.8344	14.4831	RIMOV	RIMOV	1	WATER_SUP	UD	.	.	.	.	1.3	0.33	0.97	0.74	L	8.97308	482	25.8	1978	2005	27	28	A	16	.	1.823	0.658	N	.	.	0
Long-term development of fish populations in the Římov Reservoir	Fisheries Management and Ecology	2009	JOURNAL	M. ŘÍHA, J. KUBEČKA, M. VAŠEK, J. SE?A, T. MRKVIČKA, M. PRCHALOVÁ, J. MATĒNA, M. HLADÍK, M. ČECH, V. DRAŠTÍK, J. FROUZOVÁ, E. HOHAUSOVÁ , O. JAROLÍM, T. JŮZA, M. KRATOCHVÍL, J. PETERKA, M. TUŠER	https://onlinelibrary.wiley.com/doi/full/10.1111/j.1365-2400.2008.00650.x	10	RIHA2009	21	21	21	17	T	Temperate_floodplain_rivers_and_wetlands	Central_and_western_Europe	CZECH_R.	48°50'03.9"N	14°28'59.1"E	48.8344	14.4831	RIMOV	RIMOV	1	WATER_SUP	UD	.	.	.	.	1.3	0.33	0.97	0.74	L	8.97308	482	25.8	1978	2006	28	28	A	14	.	1.708	0.647	N	.	.	0
Fisheries problems associated with development of the Peace River and its upper tributaries for hydroelectric purposes	Province of BC Fisheries Management, Fisheries Technical Circular No. 68	1959	REPORT	I.L. Withler	https://www.google.com/url?sa=t&rct=j&q=&esrc=s&source=web&cd=3&cad=rja&uact=8&ved=0ahUKEwiH1az73-zaAhUDpFkKHeKkBd4QFgg3MAI&url=http%3A%2F%2Fa100.gov.bc.ca%2Fpub%2Facat%2Fpublic%2FviewReport.do%3FreportId%3D40780&usg=AOvVaw3SsPOqOoINfP0R6Xyve_sC	11	WITH1959	3	1	1	18	T	Temperate_floodplain_rivers_and_wetlands	Upper_Mackensie	CANADA	56°02'24.6"N	123°59'02.0"W	56.0402	-123.984	WILLISTON	WAC_BENNETT	R	HYDRO	UD	334	4	16.8	.	1623.9	460.75	1163.15	0.72	C	0.612602	71707	45.8	1968	1959	-9	20	B	19	.	.	.	N	.	.	0
Fisheries Resources and Fisheries Potential of Williston Reservoir and Its Tributary Streams - Volume I: Fisheries Resources and Fisheries Potential of Williston Reservoir		1985	REPORT	D.T. Barrett, T.G. Halsey	http://www.env.gov.bc.ca/wld/documents/fisheriesrpts/FTC68.pdf	11	B&H1985	3	2	2	18	T	Temperate_floodplain_rivers_and_wetlands	Upper_Mackensie	CANADA	56°02'24.6"N	123°59'02.0"W	56.0402	-123.984	WILLISTON	WAC_BENNETT	1	HYDRO	UD	334	4	16.8	.	1623.9	460.75	1163.15	0.72	C	0.612602	71707	45.8	1968	1975	7	20	A	12	.	.	.	Y	.	.	0
Fisheries resources of Williston reservoir twenty years after impoundment	Report B.C. Environment Fisheries Branch & B.C. Hydro Environmental resources	1992	REPORT	B.G. Blackman	https://www.for.gov.bc.ca/hfd/library/documents/bib109349.pdf	11	BLACK92	3	3	3	18	T	Temperate_floodplain_rivers_and_wetlands	Upper_Mackensie	CANADA	56°02'24.6"N	123°59'02.0"W	56.0402	-123.984	WILLISTON	WAC_BENNETT	1	HYDRO	UD	334	4	16.8	.	1623.9	460.75	1163.15	0.72	C	0.612602	71707	45.8	1968	1988	20	20	A	13	.	.	.	Y	.	.	0
Fisheries problems associated with development of the Peace River and its upper tributaries for hydroelectric purposes	Province of BC Fisheries Management, Report, no. 31	1959	REPORT	I.L. Withler	https://www.google.com/url?sa=t&rct=j&q=&esrc=s&source=web&cd=3&cad=rja&uact=8&ved=0ahUKEwiH1az73-zaAhUDpFkKHeKkBd4QFgg3MAI&url=http%3A%2F%2Fa100.gov.bc.ca%2Fpub%2Facat%2Fpublic%2FviewReport.do%3FreportId%3D40780&usg=AOvVaw3SsPOqOoINfP0R6Xyve_sC	11	WITH1959	2	4	1	19	T	Temperate_floodplain_rivers_and_wetlands	Upper_Mackensie	CANADA	56°02'24.6"N	123°59'02.0"W	56.0402	-123.984	WILLISTON	WAC_BENNETT	R	HYDRO	UD	335	4	16.8	.	1623.9	460.75	1163.15	0.72	C	0.612602	71707	45.8	1968	1959	-9	20	B	19	.	.	.	N	.	.	0
Fisheries Resources and Fisheries Potential of Williston Reservoir and Its Tributary Streams - Volume I: Fisheries Resources and Fisheries Potential of Williston Reservoir		1985	REPORT	D.T. Barrett, T.G. Halsey	http://www.env.gov.bc.ca/wld/documents/fisheriesrpts/FTC68.pdf	11	B&H1985	2	5	2	19	T	Temperate_floodplain_rivers_and_wetlands	Upper_Mackensie	CANADA	56°02'24.6"N	123°59'02.0"W	56.0402	-123.984	WILLISTON	WAC_BENNETT	2	HYDRO	UD	335	4	16.8	.	1623.9	460.75	1163.15	0.72	C	0.612602	71707	45.8	1968	1975	7	20	A	11	.	.	.	Y	.	.	0
Fisheries problems associated with development of the Peace River and its upper tributaries for hydroelectric purposes	Province of BC Fisheries Management, Report, no. 31	1959	REPORT	I.L. Withler	https://www.google.com/url?sa=t&rct=j&q=&esrc=s&source=web&cd=3&cad=rja&uact=8&ved=0ahUKEwiH1az73-zaAhUDpFkKHeKkBd4QFgg3MAI&url=http%3A%2F%2Fa100.gov.bc.ca%2Fpub%2Facat%2Fpublic%2FviewReport.do%3FreportId%3D40780&usg=AOvVaw3SsPOqOoINfP0R6Xyve_sC	11	WITH1959	3	6	1	20	T	Temperate_floodplain_rivers_and_wetlands	Upper_Mackensie	CANADA	56°02'24.6"N	123°59'02.0"W	56.0402	-123.984	WILLISTON	WAC_BENNETT	R	HYDRO	UD	262	4	16.8	.	1623.9	460.75	1163.15	0.72	C	0.612602	71707	45.8	1968	1959	-9	20	B	19	.	.	.	N	.	.	0
Fisheries Resources and Fisheries Potential of Williston Reservoir and Its Tributary Streams - Volume I: Fisheries Resources and Fisheries Potential of Williston Reservoir		1985	REPORT	D.T. Barrett, T.G. Halsey	http://www.env.gov.bc.ca/wld/documents/fisheriesrpts/FTC68.pdf	11	B&H1985	3	7	2	20	T	Temperate_floodplain_rivers_and_wetlands	Upper_Mackensie	CANADA	56°02'24.6"N	123°59'02.0"W	56.0402	-123.984	WILLISTON	WAC_BENNETT	3	HYDRO	UD	262	4	16.8	.	1623.9	460.75	1163.15	0.72	C	0.612602	71707	45.8	1968	1975	7	20	A	12	.	.	.	Y	.	.	0
Fisheries resources of Williston reservoir twenty years after impoundment	Report B.C. Environment Fisheries Branch & B.C. Hydro Environmental resources	1992	REPORT	B.G. Blackman	https://www.for.gov.bc.ca/hfd/library/documents/bib109349.pdf	11	BLACK92	3	8	3	20	T	Temperate_floodplain_rivers_and_wetlands	Upper_Mackensie	CANADA	56°02'24.6"N	123°59'02.0"W	56.0402	-123.984	WILLISTON	WAC_BENNETT	3	HYDRO	UD	262	4	16.8	.	1623.9	460.75	1163.15	0.72	C	0.612602	71707	45.8	1968	1988	20	20	A	13	.	.	.	Y	.	.	0
Fisheries problems associated with development of the Peace River and its upper tributaries for hydroelectric purposes	Province of BC Fisheries Management, Report, no. 31	1959	REPORT	I.L. Withler	https://www.google.com/url?sa=t&rct=j&q=&esrc=s&source=web&cd=3&cad=rja&uact=8&ved=0ahUKEwiH1az73-zaAhUDpFkKHeKkBd4QFgg3MAI&url=http%3A%2F%2Fa100.gov.bc.ca%2Fpub%2Facat%2Fpublic%2FviewReport.do%3FreportId%3D40780&usg=AOvVaw3SsPOqOoINfP0R6Xyve_sC	11	WITH1959	3	9	1	21	T	Temperate_floodplain_rivers_and_wetlands	Upper_Mackensie	CANADA	56°02'24.6"N	123°59'02.0"W	56.0402	-123.984	WILLISTON	WAC_BENNETT	R	HYDRO	UD	291	4	16.8	.	1623.9	460.75	1163.15	0.72	C	0.612602	71707	45.8	1968	1959	-9	20	B	19	.	.	.	N	.	.	0
Fisheries Resources and Fisheries Potential of Williston Reservoir and Its Tributary Streams - Volume I: Fisheries Resources and Fisheries Potential of Williston Reservoir		1985	REPORT	D.T. Barrett, T.G. Halsey	http://www.env.gov.bc.ca/wld/documents/fisheriesrpts/FTC68.pdf	11	B&H1985	3	10	2	21	T	Temperate_floodplain_rivers_and_wetlands	Upper_Mackensie	CANADA	56°02'24.6"N	123°59'02.0"W	56.0402	-123.984	WILLISTON	WAC_BENNETT	4	HYDRO	UD	291	4	16.8	.	1623.9	460.75	1163.15	0.72	C	0.612602	71707	45.8	1968	1975	7	20	A	11	.	.	.	Y	.	.	0
Fisheries resources of Williston reservoir twenty years after impoundment	Report B.C. Environment Fisheries Branch & B.C. Hydro Environmental resources	1992	REPORT	B.G. Blackman	https://www.for.gov.bc.ca/hfd/library/documents/bib109349.pdf	11	BLACK92	3	11	3	21	T	Temperate_floodplain_rivers_and_wetlands	Upper_Mackensie	CANADA	56°02'24.6"N	123°59'02.0"W	56.0402	-123.984	WILLISTON	WAC_BENNETT	4	HYDRO	UD	291	4	16.8	.	1623.9	460.75	1163.15	0.72	C	0.612602	71707	45.8	1968	1988	20	20	A	10	.	.	.	Y	.	.	0
Fisheries problems associated with development of the Peace River and its upper tributaries for hydroelectric purposes	Province of BC Fisheries Management, Report, no. 31	1959	REPORT	I.L. Withler	https://www.google.com/url?sa=t&rct=j&q=&esrc=s&source=web&cd=3&cad=rja&uact=8&ved=0ahUKEwiH1az73-zaAhUDpFkKHeKkBd4QFgg3MAI&url=http%3A%2F%2Fa100.gov.bc.ca%2Fpub%2Facat%2Fpublic%2FviewReport.do%3FreportId%3D40780&usg=AOvVaw3SsPOqOoINfP0R6Xyve_sC	11	WITH1959	3	12	1	22	T	Temperate_floodplain_rivers_and_wetlands	Upper_Mackensie	CANADA	56°02'24.6"N	123°59'02.0"W	56.0402	-123.984	WILLISTON	WAC_BENNETT	R	HYDRO	UD	352	4	16.8	.	1623.9	460.75	1163.15	0.72	C	0.612602	71707	45.8	1968	1959	-9	20	B	19	.	.	.	N	.	.	0
Fisheries Resources and Fisheries Potential of Williston Reservoir and Its Tributary Streams - Volume I: Fisheries Resources and Fisheries Potential of Williston Reservoir		1985	REPORT	D.T. Barrett, T.G. Halsey	http://www.env.gov.bc.ca/wld/documents/fisheriesrpts/FTC68.pdf	11	B&H1985	3	13	2	22	T	Temperate_floodplain_rivers_and_wetlands	Upper_Mackensie	CANADA	56°02'24.6"N	123°59'02.0"W	56.0402	-123.984	WILLISTON	WAC_BENNETT	5	HYDRO	UD	352	4	16.8	.	1623.9	460.75	1163.15	0.72	C	0.612602	71707	45.8	1968	1975	7	20	A	12	.	.	.	Y	.	.	0
Fisheries resources of Williston reservoir twenty years after impoundment	Report B.C. Environment Fisheries Branch & B.C. Hydro Environmental resources	1992	REPORT	B.G. Blackman	https://www.for.gov.bc.ca/hfd/library/documents/bib109349.pdf	11	BLACK92	3	14	3	22	T	Temperate_floodplain_rivers_and_wetlands	Upper_Mackensie	CANADA	56°02'24.6"N	123°59'02.0"W	56.0402	-123.984	WILLISTON	WAC_BENNETT	5	HYDRO	UD	352	4	16.8	.	1623.9	460.75	1163.15	0.72	C	0.612602	71707	45.8	1968	1988	20	20	A	11	.	.	.	Y	.	.	0
Fisheries problems associated with development of the Peace River and its upper tributaries for hydroelectric purposes	Province of BC Fisheries Management, Report, no. 31	1959	REPORT	I.L. Withler	https://www.google.com/url?sa=t&rct=j&q=&esrc=s&source=web&cd=3&cad=rja&uact=8&ved=0ahUKEwiH1az73-zaAhUDpFkKHeKkBd4QFgg3MAI&url=http%3A%2F%2Fa100.gov.bc.ca%2Fpub%2Facat%2Fpublic%2FviewReport.do%3FreportId%3D40780&usg=AOvVaw3SsPOqOoINfP0R6Xyve_sC	11	WITH1959	2	15	1	23	T	Temperate_floodplain_rivers_and_wetlands	Upper_Mackensie	CANADA	56°02'24.6"N	123°59'02.0"W	56.0402	-123.984	WILLISTON	WAC_BENNETT	R	HYDRO	UD	408	4	16.8	.	1623.9	460.75	1163.15	0.72	C	0.612602	71707	45.8	1968	1959	-9	20	B	19	.	.	.	N	.	.	0
Fisheries Resources and Fisheries Potential of Williston Reservoir and Its Tributary Streams - Volume I: Fisheries Resources and Fisheries Potential of Williston Reservoir		1985	REPORT	D.T. Barrett, T.G. Halsey	http://www.env.gov.bc.ca/wld/documents/fisheriesrpts/FTC68.pdf	11	B&H1985	2	16	2	23	T	Temperate_floodplain_rivers_and_wetlands	Upper_Mackensie	CANADA	56°02'24.6"N	123°59'02.0"W	56.0402	-123.984	WILLISTON	WAC_BENNETT	6	HYDRO	UD	408	4	16.8	.	1623.9	460.75	1163.15	0.72	C	0.612602	71707	45.8	1968	1975	7	20	A	10	.	.	.	Y	.	.	0
Fisheries problems associated with development of the Peace River and its upper tributaries for hydroelectric purposes	Province of BC Fisheries Management, Report, no. 31	1959	REPORT	I.L. Withler	https://www.google.com/url?sa=t&rct=j&q=&esrc=s&source=web&cd=3&cad=rja&uact=8&ved=0ahUKEwiH1az73-zaAhUDpFkKHeKkBd4QFgg3MAI&url=http%3A%2F%2Fa100.gov.bc.ca%2Fpub%2Facat%2Fpublic%2FviewReport.do%3FreportId%3D40780&usg=AOvVaw3SsPOqOoINfP0R6Xyve_sC	11	WITH1959	3	17	1	24	T	Temperate_floodplain_rivers_and_wetlands	Upper_Mackensie	CANADA	56°02'24.6"N	123°59'02.0"W	56.0402	-123.984	WILLISTON	WAC_BENNETT	R	HYDRO	UD	143	4	16.8	.	1623.9	460.75	1163.15	0.72	C	0.612602	71707	45.8	1968	1959	-9	20	B	19	.	.	.	N	.	.	0
Fisheries Resources and Fisheries Potential of Williston Reservoir and Its Tributary Streams - Volume I: Fisheries Resources and Fisheries Potential of Williston Reservoir		1985	REPORT	D.T. Barrett, T.G. Halsey	http://www.env.gov.bc.ca/wld/documents/fisheriesrpts/FTC68.pdf	11	B&H1985	3	18	2	24	T	Temperate_floodplain_rivers_and_wetlands	Upper_Mackensie	CANADA	56°02'24.6"N	123°59'02.0"W	56.0402	-123.984	WILLISTON	WAC_BENNETT	7	HYDRO	UD	143	4	16.8	.	1623.9	460.75	1163.15	0.72	C	0.612602	71707	45.8	1968	1975	7	20	A	11	.	.	.	Y	.	.	0
Fisheries resources of Williston reservoir twenty years after impoundment	Report B.C. Environment Fisheries Branch & B.C. Hydro Environmental resources	1992	REPORT	B.G. Blackman	https://www.for.gov.bc.ca/hfd/library/documents/bib109349.pdf	11	BLACK92	3	19	3	24	T	Temperate_floodplain_rivers_and_wetlands	Upper_Mackensie	CANADA	56°02'24.6"N	123°59'02.0"W	56.0402	-123.984	WILLISTON	WAC_BENNETT	7	HYDRO	UD	143	4	16.8	.	1623.9	460.75	1163.15	0.72	C	0.612602	71707	45.8	1968	1988	20	20	A	13	.	.	.	Y	.	.	0
Fisheries problems associated with development of the Peace River and its upper tributaries for hydroelectric purposes	Province of BC Fisheries Management, Report, no. 31	1959	REPORT	I.L. Withler	https://www.google.com/url?sa=t&rct=j&q=&esrc=s&source=web&cd=3&cad=rja&uact=8&ved=0ahUKEwiH1az73-zaAhUDpFkKHeKkBd4QFgg3MAI&url=http%3A%2F%2Fa100.gov.bc.ca%2Fpub%2Facat%2Fpublic%2FviewReport.do%3FreportId%3D40780&usg=AOvVaw3SsPOqOoINfP0R6Xyve_sC	11	WITH1959	2	20	1	25	T	Temperate_floodplain_rivers_and_wetlands	Upper_Mackensie	CANADA	56°02'24.6"N	123°59'02.0"W	56.0402	-123.984	WILLISTON	WAC_BENNETT	R	HYDRO	UD	142	4	16.8	.	1623.9	460.75	1163.15	0.72	C	0.612602	71707	45.8	1968	1959	-9	20	B	19	.	.	.	N	.	.	0
Fisheries Resources and Fisheries Potential of Williston Reservoir and Its Tributary Streams - Volume I: Fisheries Resources and Fisheries Potential of Williston Reservoir		1985	REPORT	D.T. Barrett, T.G. Halsey	http://www.env.gov.bc.ca/wld/documents/fisheriesrpts/FTC68.pdf	11	B&H1985	2	21	2	25	T	Temperate_floodplain_rivers_and_wetlands	Upper_Mackensie	CANADA	56°02'24.6"N	123°59'02.0"W	56.0402	-123.984	WILLISTON	WAC_BENNETT	8	HYDRO	UD	142	4	16.8	.	1623.9	460.75	1163.15	0.72	C	0.612602	71707	45.8	1968	1975	7	20	A	12	.	.	.	Y	.	.	0
Fisheries problems associated with development of the Peace River and its upper tributaries for hydroelectric purposes	Province of BC Fisheries Management, Report, no. 31	1959	REPORT	I.L. Withler	https://www.google.com/url?sa=t&rct=j&q=&esrc=s&source=web&cd=3&cad=rja&uact=8&ved=0ahUKEwiH1az73-zaAhUDpFkKHeKkBd4QFgg3MAI&url=http%3A%2F%2Fa100.gov.bc.ca%2Fpub%2Facat%2Fpublic%2FviewReport.do%3FreportId%3D40780&usg=AOvVaw3SsPOqOoINfP0R6Xyve_sC	11	WITH1959	2	22	1	26	T	Temperate_floodplain_rivers_and_wetlands	Upper_Mackensie	CANADA	56°02'24.6"N	123°59'02.0"W	56.0402	-123.984	WILLISTON	WAC_BENNETT	R	HYDRO	UD	25	4	16.8	.	1623.9	460.75	1163.15	0.72	C	0.612602	71707	45.8	1968	1959	-9	20	B	19	.	.	.	N	.	.	0
Fisheries Resources and Fisheries Potential of Williston Reservoir and Its Tributary Streams - Volume I: Fisheries Resources and Fisheries Potential of Williston Reservoir		1985	REPORT	D.T. Barrett, T.G. Halsey	http://www.env.gov.bc.ca/wld/documents/fisheriesrpts/FTC68.pdf	11	B&H1985	2	23	2	26	T	Temperate_floodplain_rivers_and_wetlands	Upper_Mackensie	CANADA	56°02'24.6"N	123°59'02.0"W	56.0402	-123.984	WILLISTON	WAC_BENNETT	9	HYDRO	UD	25	4	16.8	.	1623.9	460.75	1163.15	0.72	C	0.612602	71707	45.8	1968	1975	7	20	A	14	.	.	.	Y	.	.	0
Fisheries problems associated with development of the Peace River and its upper tributaries for hydroelectric purposes	Province of BC Fisheries Management, Report, no. 31	1959	REPORT	I.L. Withler	https://www.google.com/url?sa=t&rct=j&q=&esrc=s&source=web&cd=3&cad=rja&uact=8&ved=0ahUKEwiH1az73-zaAhUDpFkKHeKkBd4QFgg3MAI&url=http%3A%2F%2Fa100.gov.bc.ca%2Fpub%2Facat%2Fpublic%2FviewReport.do%3FreportId%3D40780&usg=AOvVaw3SsPOqOoINfP0R6Xyve_sC	11	WITH1959	3	24	1	27	T	Temperate_floodplain_rivers_and_wetlands	Upper_Mackensie	CANADA	56°02'24.6"N	123°59'02.0"W	56.0402	-123.984	WILLISTON	WAC_BENNETT	R	HYDRO	UD	0.2	4	16.8	.	1623.9	460.75	1163.15	0.72	C	0.612602	71707	45.8	1968	1959	-9	20	B	19	.	.	.	N	.	.	0
Fisheries Resources and Fisheries Potential of Williston Reservoir and Its Tributary Streams - Volume I: Fisheries Resources and Fisheries Potential of Williston Reservoir		1985	REPORT	D.T. Barrett, T.G. Halsey	http://www.env.gov.bc.ca/wld/documents/fisheriesrpts/FTC68.pdf	11	B&H1985	3	25	2	27	T	Temperate_floodplain_rivers_and_wetlands	Upper_Mackensie	CANADA	56°02'24.6"N	123°59'02.0"W	56.0402	-123.984	WILLISTON	WAC_BENNETT	10	HYDRO	UD	0.2	4	16.8	.	1623.9	460.75	1163.15	0.72	C	0.612602	71707	45.8	1968	1975	7	20	A	12	.	.	.	Y	.	.	0
Fisheries resources of Williston reservoir twenty years after impoundment	Report B.C. Environment Fisheries Branch & B.C. Hydro Environmental resources	1992	REPORT	B.G. Blackman	https://www.for.gov.bc.ca/hfd/library/documents/bib109349.pdf	11	BLACK92	3	26	3	27	T	Temperate_floodplain_rivers_and_wetlands	Upper_Mackensie	CANADA	56°02'24.6"N	123°59'02.0"W	56.0402	-123.984	WILLISTON	WAC_BENNETT	10	HYDRO	UD	0.2	4	16.8	.	1623.9	460.75	1163.15	0.72	C	0.612602	71707	45.8	1968	1988	20	20	A	11	.	.	.	Y	.	.	0
Large dam reservoirs are probably long-period oscillators of fish diversity	Journal of Fish Biology	2012	JOURNAL	Ł. Głowacki, T. Penczak	https://onlinelibrary.wiley.com/doi/abs/10.1111/j.1095-8649.2012.03274.x	12	G&P2000	8	1	1	28	T	Temperate_floodplain_rivers_and_wetlands	Central_and_western_Europe	POLAND	51°48'20.4"N	18°40'24.1"E	51.8057	18.6734	JEZIORSKO	JEZIORSKO	AB_P	HYDRO	UR	25.9	.	5	.	35.8	2.88	32.93	0.92	L	0.886642	9014	5.7	1986	1985	-1	9	B	9	.	.	.	N	.	.	1
Large dam reservoirs are probably long-period oscillators of fish diversity	Journal of Fish Biology	2012	JOURNAL	Ł. Głowacki, T. Penczak	https://onlinelibrary.wiley.com/doi/abs/10.1111/j.1095-8649.2012.03274.x	12	G&P2000	8	2	2	28	T	Temperate_floodplain_rivers_and_wetlands	Central_and_western_Europe	POLAND	51°48'20.4"N	18°40'24.1"E	51.8057	18.6734	JEZIORSKO	JEZIORSKO	AB_P	HYDRO	UR	25.9	.	5	.	35.8	2.88	32.92	0.92	L	0.886642	9014	5.7	1986	1986	0	9	A	9	.	.	.	N	.	.	1
Large dam reservoirs are probably long-period oscillators of fish diversity	Journal of Fish Biology	2012	JOURNAL	Ł. Głowacki, T. Penczak	https://onlinelibrary.wiley.com/doi/abs/10.1111/j.1095-8649.2012.03274.x	12	G&P2000	8	3	3	28	T	Temperate_floodplain_rivers_and_wetlands	Central_and_western_Europe	POLAND	51°48'20.4"N	18°40'24.1"E	51.8057	18.6734	JEZIORSKO	JEZIORSKO	AB_P	HYDRO	UR	25.9	.	5	.	35.8	2.88	32.92	0.92	L	0.886642	9014	5.7	1986	1987	1	9	A	12	.	.	.	N	.	.	1
Large dam reservoirs are probably long-period oscillators of fish diversity	Journal of Fish Biology	2012	JOURNAL	Ł. Głowacki, T. Penczak	https://onlinelibrary.wiley.com/doi/abs/10.1111/j.1095-8649.2012.03274.x	12	G&P2000	8	4	4	28	T	Temperate_floodplain_rivers_and_wetlands	Central_and_western_Europe	POLAND	51°48'20.4"N	18°40'24.1"E	51.8057	18.6734	JEZIORSKO	JEZIORSKO	AB_P	HYDRO	UR	25.9	.	5	.	35.8	2.88	32.92	0.92	L	0.886642	9014	5.7	1986	1989	3	9	A	9	.	.	.	N	.	.	1
Large dam reservoirs are probably long-period oscillators of fish diversity	Journal of Fish Biology	2012	JOURNAL	Ł. Głowacki, T. Penczak	https://onlinelibrary.wiley.com/doi/abs/10.1111/j.1095-8649.2012.03274.x	12	G&P2000	8	5	5	28	T	Temperate_floodplain_rivers_and_wetlands	Central_and_western_Europe	POLAND	51°48'20.4"N	18°40'24.1"E	51.8057	18.6734	JEZIORSKO	JEZIORSKO	AB_P	HYDRO	UR	25.9	.	5	.	35.8	2.88	32.92	0.92	L	0.886642	9014	5.7	1986	1992	6	9	A	8	.	.	.	N	.	.	1
Large dam reservoirs are probably long-period oscillators of fish diversity	Journal of Fish Biology	2012	JOURNAL	Ł. Głowacki, T. Penczak	https://onlinelibrary.wiley.com/doi/abs/10.1111/j.1095-8649.2012.03274.x	12	G&P2000	8	6	6	28	T	Temperate_floodplain_rivers_and_wetlands	Central_and_western_Europe	POLAND	51°48'20.4"N	18°40'24.1"E	51.8057	18.6734	JEZIORSKO	JEZIORSKO	AB_P	HYDRO	UR	25.9	.	5	.	35.8	2.88	32.92	0.92	L	0.886642	9014	5.7	1986	1993	7	9	A	12	.	.	.	N	.	.	1
Large dam reservoirs are probably long-period oscillators of fish diversity	Journal of Fish Biology	2012	JOURNAL	Ł. Głowacki, T. Penczak	https://onlinelibrary.wiley.com/doi/abs/10.1111/j.1095-8649.2012.03274.x	12	G&P2000	8	7	7	28	T	Temperate_floodplain_rivers_and_wetlands	Central_and_western_Europe	POLAND	51°48'20.4"N	18°40'24.1"E	51.8057	18.6734	JEZIORSKO	JEZIORSKO	AB_P	HYDRO	UR	25.9	.	5	.	35.8	2.88	32.92	0.92	L	0.886642	9014	5.7	1986	1994	8	9	A	9	.	.	.	N	.	.	1
Large dam reservoirs are probably long-period oscillators of fish diversity	Journal of Fish Biology	2012	JOURNAL	Ł. Głowacki, T. Penczak	https://onlinelibrary.wiley.com/doi/abs/10.1111/j.1095-8649.2012.03274.x	12	G&P2000	8	8	8	28	T	Temperate_floodplain_rivers_and_wetlands	Central_and_western_Europe	POLAND	51°48'20.4"N	18°40'24.1"E	51.8057	18.6734	JEZIORSKO	JEZIORSKO	AB_P	HYDRO	UR	25.9	.	5	.	35.8	2.88	32.92	0.92	L	0.886642	9014	5.7	1986	1995	9	9	A	8	.	.	.	N	.	.	1
Large dam reservoirs are probably long-period oscillators of fish diversity	Journal of Fish Biology	2012	JOURNAL	Ł. Głowacki, T. Penczak	https://onlinelibrary.wiley.com/doi/abs/10.1111/j.1095-8649.2012.03274.x	12	G&P2000	7	9	1	29	T	Temperate_floodplain_rivers_and_wetlands	Central_and_western_Europe	POLAND	51°48'20.4"N	18°40'24.1"E	51.8057	18.6734	JEZIORSKO	JEZIORSKO	AB_S	HYDRO	UR	25.9	.	5	.	35.8	2.88	32.92	0.92	L	0.886642	9014	5.7	1986	1985	-1	9	B	12	.	.	.	N	.	.	1
Large dam reservoirs are probably long-period oscillators of fish diversity	Journal of Fish Biology	2012	JOURNAL	Ł. Głowacki, T. Penczak	https://onlinelibrary.wiley.com/doi/abs/10.1111/j.1095-8649.2012.03274.x	12	G&P2000	7	10	2	29	T	Temperate_floodplain_rivers_and_wetlands	Central_and_western_Europe	POLAND	51°48'20.4"N	18°40'24.1"E	51.8057	18.6734	JEZIORSKO	JEZIORSKO	AB_S	HYDRO	UR	25.9	.	5	.	35.8	2.88	32.92	0.92	L	0.886642	9014	5.7	1986	1987	1	9	A	12	.	.	.	N	.	.	1
Large dam reservoirs are probably long-period oscillators of fish diversity	Journal of Fish Biology	2012	JOURNAL	Ł. Głowacki, T. Penczak	https://onlinelibrary.wiley.com/doi/abs/10.1111/j.1095-8649.2012.03274.x	12	G&P2000	7	11	3	29	T	Temperate_floodplain_rivers_and_wetlands	Central_and_western_Europe	POLAND	51°48'20.4"N	18°40'24.1"E	51.8057	18.6734	JEZIORSKO	JEZIORSKO	AB_S	HYDRO	UR	25.9	.	5	.	35.8	2.88	32.92	0.92	L	0.886642	9014	5.7	1986	1988	2	9	A	13	.	.	.	N	.	.	1
Large dam reservoirs are probably long-period oscillators of fish diversity	Journal of Fish Biology	2012	JOURNAL	Ł. Głowacki, T. Penczak	https://onlinelibrary.wiley.com/doi/abs/10.1111/j.1095-8649.2012.03274.x	12	G&P2000	7	12	4	29	T	Temperate_floodplain_rivers_and_wetlands	Central_and_western_Europe	POLAND	51°48'20.4"N	18°40'24.1"E	51.8057	18.6734	JEZIORSKO	JEZIORSKO	AB_S	HYDRO	UR	25.9	.	5	.	35.8	2.88	32.92	0.92	L	0.886642	9014	5.7	1986	1989	3	9	A	12	.	.	.	N	.	.	1
Large dam reservoirs are probably long-period oscillators of fish diversity	Journal of Fish Biology	2012	JOURNAL	Ł. Głowacki, T. Penczak	https://onlinelibrary.wiley.com/doi/abs/10.1111/j.1095-8649.2012.03274.x	12	G&P2000	7	13	5	29	T	Temperate_floodplain_rivers_and_wetlands	Central_and_western_Europe	POLAND	51°48'20.4"N	18°40'24.1"E	51.8057	18.6734	JEZIORSKO	JEZIORSKO	AB_S	HYDRO	UR	25.9	.	5	.	35.8	2.88	32.92	0.92	L	0.886642	9014	5.7	1986	1990	4	9	A	12	.	.	.	N	.	.	1
Large dam reservoirs are probably long-period oscillators of fish diversity	Journal of Fish Biology	2012	JOURNAL	Ł. Głowacki, T. Penczak	https://onlinelibrary.wiley.com/doi/abs/10.1111/j.1095-8649.2012.03274.x	12	G&P2000	7	14	6	29	T	Temperate_floodplain_rivers_and_wetlands	Central_and_western_Europe	POLAND	51°48'20.4"N	18°40'24.1"E	51.8057	18.6734	JEZIORSKO	JEZIORSKO	AB_S	HYDRO	UR	25.9	.	5	.	35.8	2.88	32.92	0.92	L	0.886642	9014	5.7	1986	1991	5	9	A	11	.	.	.	N	.	.	1
Large dam reservoirs are probably long-period oscillators of fish diversity	Journal of Fish Biology	2012	JOURNAL	Ł. Głowacki, T. Penczak	https://onlinelibrary.wiley.com/doi/abs/10.1111/j.1095-8649.2012.03274.x	12	G&P2000	7	15	7	29	T	Temperate_floodplain_rivers_and_wetlands	Central_and_western_Europe	POLAND	51°48'20.4"N	18°40'24.1"E	51.8057	18.6734	JEZIORSKO	JEZIORSKO	AB_S	HYDRO	UR	25.9	.	5	.	35.8	2.88	32.92	0.92	L	0.886642	9014	5.7	1986	1993	7	9	A	13	.	.	.	N	.	.	1
Large dam reservoirs are probably long-period oscillators of fish diversity	Journal of Fish Biology	2012	JOURNAL	Ł. Głowacki, T. Penczak	https://onlinelibrary.wiley.com/doi/abs/10.1111/j.1095-8649.2012.03274.x	12	G&P2000	9	16	1	30	T	Temperate_floodplain_rivers_and_wetlands	Central_and_western_Europe	POLAND	51°48'20.4"N	18°40'24.1"E	51.8057	18.6734	JEZIORSKO	JEZIORSKO	C_P	HYDRO	D	2.09	.	5	.	35.8	2.88	32.92	0.92	L	0.886642	9014	5.7	1986	1994	8	9	A	11	.	.	.	N	.	.	1
Large dam reservoirs are probably long-period oscillators of fish diversity	Journal of Fish Biology	2012	JOURNAL	Ł. Głowacki, T. Penczak	https://onlinelibrary.wiley.com/doi/abs/10.1111/j.1095-8649.2012.03274.x	12	G&P2000	9	17	2	30	T	Temperate_floodplain_rivers_and_wetlands	Central_and_western_Europe	POLAND	51°48'20.4"N	18°40'24.1"E	51.8057	18.6734	JEZIORSKO	JEZIORSKO	C_P	HYDRO	D	2.09	.	5	.	35.8	2.88	32.92	0.92	L	0.886642	9014	5.7	1986	1985	-1	9	B	9	.	.	.	N	.	.	1
Large dam reservoirs are probably long-period oscillators of fish diversity	Journal of Fish Biology	2012	JOURNAL	Ł. Głowacki, T. Penczak	https://onlinelibrary.wiley.com/doi/abs/10.1111/j.1095-8649.2012.03274.x	12	G&P2000	9	18	3	30	T	Temperate_floodplain_rivers_and_wetlands	Central_and_western_Europe	POLAND	51°48'20.4"N	18°40'24.1"E	51.8057	18.6734	JEZIORSKO	JEZIORSKO	C_P	HYDRO	D	2.09	.	5	.	35.8	2.88	32.92	0.92	L	0.886642	9014	5.7	1986	1986	0	9	A	9	.	.	.	N	.	.	1
Large dam reservoirs are probably long-period oscillators of fish diversity	Journal of Fish Biology	2012	JOURNAL	Ł. Głowacki, T. Penczak	https://onlinelibrary.wiley.com/doi/abs/10.1111/j.1095-8649.2012.03274.x	12	G&P2000	9	19	4	30	T	Temperate_floodplain_rivers_and_wetlands	Central_and_western_Europe	POLAND	51°48'20.4"N	18°40'24.1"E	51.8057	18.6734	JEZIORSKO	JEZIORSKO	C_P	HYDRO	D	2.09	.	5	.	35.8	2.88	32.92	0.92	L	0.886642	9014	5.7	1986	1987	1	9	A	10	.	.	.	N	.	.	1
Large dam reservoirs are probably long-period oscillators of fish diversity	Journal of Fish Biology	2012	JOURNAL	Ł. Głowacki, T. Penczak	https://onlinelibrary.wiley.com/doi/abs/10.1111/j.1095-8649.2012.03274.x	12	G&P2000	9	20	5	30	T	Temperate_floodplain_rivers_and_wetlands	Central_and_western_Europe	POLAND	51°48'20.4"N	18°40'24.1"E	51.8057	18.6734	JEZIORSKO	JEZIORSKO	C_P	HYDRO	D	2.09	.	5	.	35.8	2.88	32.92	0.92	L	0.886642	9014	5.7	1986	1989	3	9	A	10	.	.	.	N	.	.	1
Large dam reservoirs are probably long-period oscillators of fish diversity	Journal of Fish Biology	2012	JOURNAL	Ł. Głowacki, T. Penczak	https://onlinelibrary.wiley.com/doi/abs/10.1111/j.1095-8649.2012.03274.x	12	G&P2000	9	21	6	30	T	Temperate_floodplain_rivers_and_wetlands	Central_and_western_Europe	POLAND	51°48'20.4"N	18°40'24.1"E	51.8057	18.6734	JEZIORSKO	JEZIORSKO	C_P	HYDRO	D	2.09	.	5	.	35.8	2.88	32.92	0.92	L	0.886642	9014	5.7	1986	1992	6	9	A	7	.	.	.	N	.	.	1
Large dam reservoirs are probably long-period oscillators of fish diversity	Journal of Fish Biology	2012	JOURNAL	Ł. Głowacki, T. Penczak	https://onlinelibrary.wiley.com/doi/abs/10.1111/j.1095-8649.2012.03274.x	12	G&P2000	9	22	7	30	T	Temperate_floodplain_rivers_and_wetlands	Central_and_western_Europe	POLAND	51°48'20.4"N	18°40'24.1"E	51.8057	18.6734	JEZIORSKO	JEZIORSKO	C_P	HYDRO	D	2.09	.	5	.	35.8	2.88	32.92	0.92	L	0.886642	9014	5.7	1986	1993	7	9	A	6	.	.	.	N	.	.	1
Large dam reservoirs are probably long-period oscillators of fish diversity	Journal of Fish Biology	2012	JOURNAL	Ł. Głowacki, T. Penczak	https://onlinelibrary.wiley.com/doi/abs/10.1111/j.1095-8649.2012.03274.x	12	G&P2000	9	23	8	30	T	Temperate_floodplain_rivers_and_wetlands	Central_and_western_Europe	POLAND	51°48'20.4"N	18°40'24.1"E	51.8057	18.6734	JEZIORSKO	JEZIORSKO	C_P	HYDRO	D	2.09	.	5	.	35.8	2.88	32.92	0.92	L	0.886642	9014	5.7	1986	1994	8	9	A	8	.	.	.	N	.	.	1
Large dam reservoirs are probably long-period oscillators of fish diversity	Journal of Fish Biology	2012	JOURNAL	Ł. Głowacki, T. Penczak	https://onlinelibrary.wiley.com/doi/abs/10.1111/j.1095-8649.2012.03274.x	12	G&P2000	9	24	9	30	T	Temperate_floodplain_rivers_and_wetlands	Central_and_western_Europe	POLAND	51°48'20.4"N	18°40'24.1"E	51.8057	18.6734	JEZIORSKO	JEZIORSKO	C_P	HYDRO	D	2.09	.	5	.	35.8	2.88	32.92	0.92	L	0.886642	9014	5.7	1986	1995	9	9	A	6	.	.	.	N	.	.	1
Large dam reservoirs are probably long-period oscillators of fish diversity	Journal of Fish Biology	2012	JOURNAL	Ł. Głowacki, T. Penczak	https://onlinelibrary.wiley.com/doi/abs/10.1111/j.1095-8649.2012.03274.x	12	G&P2000	11	25	1	31	T	Temperate_floodplain_rivers_and_wetlands	Central_and_western_Europe	POLAND	51°48'20.4"N	18°40'24.1"E	51.8057	18.6734	JEZIORSKO	JEZIORSKO	C_S	HYDRO	D	2.09	.	5	.	35.8	2.88	32.92	0.92	L	0.886642	9014	5.7	1986	1985	-1	9	B	11	.	.	.	N	.	.	1
Large dam reservoirs are probably long-period oscillators of fish diversity	Journal of Fish Biology	2012	JOURNAL	Ł. Głowacki, T. Penczak	https://onlinelibrary.wiley.com/doi/abs/10.1111/j.1095-8649.2012.03274.x	12	G&P2000	11	26	2	31	T	Temperate_floodplain_rivers_and_wetlands	Central_and_western_Europe	POLAND	51°48'20.4"N	18°40'24.1"E	51.8057	18.6734	JEZIORSKO	JEZIORSKO	C_S	HYDRO	D	2.09	.	5	.	35.8	2.88	32.92	0.92	L	0.886642	9014	5.7	1986	1986	0	9	A	10	.	.	.	N	.	.	1
Large dam reservoirs are probably long-period oscillators of fish diversity	Journal of Fish Biology	2012	JOURNAL	Ł. Głowacki, T. Penczak	https://onlinelibrary.wiley.com/doi/abs/10.1111/j.1095-8649.2012.03274.x	12	G&P2000	11	27	3	31	T	Temperate_floodplain_rivers_and_wetlands	Central_and_western_Europe	POLAND	51°48'20.4"N	18°40'24.1"E	51.8057	18.6734	JEZIORSKO	JEZIORSKO	C_S	HYDRO	D	2.09	.	5	.	35.8	2.88	32.92	0.92	L	0.886642	9014	5.7	1986	1987	1	9	A	10	.	.	.	N	.	.	1
Large dam reservoirs are probably long-period oscillators of fish diversity	Journal of Fish Biology	2012	JOURNAL	Ł. Głowacki, T. Penczak	https://onlinelibrary.wiley.com/doi/abs/10.1111/j.1095-8649.2012.03274.x	12	G&P2000	11	28	4	31	T	Temperate_floodplain_rivers_and_wetlands	Central_and_western_Europe	POLAND	51°48'20.4"N	18°40'24.1"E	51.8057	18.6734	JEZIORSKO	JEZIORSKO	C_S	HYDRO	D	2.09	.	5	.	35.8	2.88	32.92	0.92	L	0.886642	9014	5.7	1986	1988	2	9	A	10	.	.	.	N	.	.	1
Large dam reservoirs are probably long-period oscillators of fish diversity	Journal of Fish Biology	2012	JOURNAL	Ł. Głowacki, T. Penczak	https://onlinelibrary.wiley.com/doi/abs/10.1111/j.1095-8649.2012.03274.x	12	G&P2000	11	29	5	31	T	Temperate_floodplain_rivers_and_wetlands	Central_and_western_Europe	POLAND	51°48'20.4"N	18°40'24.1"E	51.8057	18.6734	JEZIORSKO	JEZIORSKO	C_S	HYDRO	D	2.09	.	5	.	35.8	2.88	32.92	0.92	L	0.886642	9014	5.7	1986	1989	3	9	A	9	.	.	.	N	.	.	1
Large dam reservoirs are probably long-period oscillators of fish diversity	Journal of Fish Biology	2012	JOURNAL	Ł. Głowacki, T. Penczak	https://onlinelibrary.wiley.com/doi/abs/10.1111/j.1095-8649.2012.03274.x	12	G&P2000	11	30	6	31	T	Temperate_floodplain_rivers_and_wetlands	Central_and_western_Europe	POLAND	51°48'20.4"N	18°40'24.1"E	51.8057	18.6734	JEZIORSKO	JEZIORSKO	C_S	HYDRO	D	2.09	.	5	.	35.8	2.88	32.92	0.92	L	0.886642	9014	5.7	1986	1990	4	9	A	7	.	.	.	N	.	.	1
Large dam reservoirs are probably long-period oscillators of fish diversity	Journal of Fish Biology	2012	JOURNAL	Ł. Głowacki, T. Penczak	https://onlinelibrary.wiley.com/doi/abs/10.1111/j.1095-8649.2012.03274.x	12	G&P2000	11	31	7	31	T	Temperate_floodplain_rivers_and_wetlands	Central_and_western_Europe	POLAND	51°48'20.4"N	18°40'24.1"E	51.8057	18.6734	JEZIORSKO	JEZIORSKO	C_S	HYDRO	D	2.09	.	5	.	35.8	2.88	32.92	0.92	L	0.886642	9014	5.7	1986	1991	5	9	A	10	.	.	.	N	.	.	1
Large dam reservoirs are probably long-period oscillators of fish diversity	Journal of Fish Biology	2012	JOURNAL	Ł. Głowacki, T. Penczak	https://onlinelibrary.wiley.com/doi/abs/10.1111/j.1095-8649.2012.03274.x	12	G&P2000	11	32	8	31	T	Temperate_floodplain_rivers_and_wetlands	Central_and_western_Europe	POLAND	51°48'20.4"N	18°40'24.1"E	51.8057	18.6734	JEZIORSKO	JEZIORSKO	C_S	HYDRO	D	2.09	.	5	.	35.8	2.88	32.92	0.92	L	0.886642	9014	5.7	1986	1992	6	9	A	7	.	.	.	N	.	.	1
Large dam reservoirs are probably long-period oscillators of fish diversity	Journal of Fish Biology	2012	JOURNAL	Ł. Głowacki, T. Penczak	https://onlinelibrary.wiley.com/doi/abs/10.1111/j.1095-8649.2012.03274.x	12	G&P2000	11	33	9	31	T	Temperate_floodplain_rivers_and_wetlands	Central_and_western_Europe	POLAND	51°48'20.4"N	18°40'24.1"E	51.8057	18.6734	JEZIORSKO	JEZIORSKO	C_S	HYDRO	D	2.09	.	5	.	35.8	2.88	32.92	0.92	L	0.886642	9014	5.7	1986	1993	7	9	A	6	.	.	.	N	.	.	1
Large dam reservoirs are probably long-period oscillators of fish diversity	Journal of Fish Biology	2012	JOURNAL	Ł. Głowacki, T. Penczak	https://onlinelibrary.wiley.com/doi/abs/10.1111/j.1095-8649.2012.03274.x	12	G&P2000	11	34	10	31	T	Temperate_floodplain_rivers_and_wetlands	Central_and_western_Europe	POLAND	51°48'20.4"N	18°40'24.1"E	51.8057	18.6734	JEZIORSKO	JEZIORSKO	C_S	HYDRO	D	2.09	.	5	.	35.8	2.88	32.92	0.92	L	0.886642	9014	5.7	1986	1994	8	9	A	8	.	.	.	N	.	.	1
Large dam reservoirs are probably long-period oscillators of fish diversity	Journal of Fish Biology	2012	JOURNAL	Ł. Głowacki, T. Penczak	https://onlinelibrary.wiley.com/doi/abs/10.1111/j.1095-8649.2012.03274.x	12	G&P2000	11	35	11	31	T	Temperate_floodplain_rivers_and_wetlands	Central_and_western_Europe	POLAND	51°48'20.4"N	18°40'24.1"E	51.8057	18.6734	JEZIORSKO	JEZIORSKO	C_S	HYDRO	D	2.09	.	5	.	35.8	2.88	32.92	0.92	L	0.886642	9014	5.7	1986	1995	9	9	A	5	.	.	.	N	.	.	1
Large dam reservoirs are probably long-period oscillators of fish diversity	Journal of Fish Biology	2012	JOURNAL	Ł. Głowacki, T. Penczak	https://onlinelibrary.wiley.com/doi/abs/10.1111/j.1095-8649.2012.03274.x	12	G&P2000	8	36	1	32	T	Temperate_floodplain_rivers_and_wetlands	Central_and_western_Europe	POLAND	51°48'20.4"N	18°40'24.1"E	51.8057	18.6734	JEZIORSKO	JEZIORSKO	D_P	HYDRO	D	2.5	.	5	.	35.8	2.88	32.92	0.92	L	0.886642	9014	5.7	1986	1985	-1	9	B	10	.	.	.	N	.	.	1
Large dam reservoirs are probably long-period oscillators of fish diversity	Journal of Fish Biology	2012	JOURNAL	Ł. Głowacki, T. Penczak	https://onlinelibrary.wiley.com/doi/abs/10.1111/j.1095-8649.2012.03274.x	12	G&P2000	8	37	2	32	T	Temperate_floodplain_rivers_and_wetlands	Central_and_western_Europe	POLAND	51°48'20.4"N	18°40'24.1"E	51.8057	18.6734	JEZIORSKO	JEZIORSKO	D_P	HYDRO	D	2.5	.	5	.	35.8	2.88	32.92	0.92	L	0.886642	9014	5.7	1986	1986	0	9	A	12	.	.	.	N	.	.	1
Large dam reservoirs are probably long-period oscillators of fish diversity	Journal of Fish Biology	2012	JOURNAL	Ł. Głowacki, T. Penczak	https://onlinelibrary.wiley.com/doi/abs/10.1111/j.1095-8649.2012.03274.x	12	G&P2000	8	38	3	32	T	Temperate_floodplain_rivers_and_wetlands	Central_and_western_Europe	POLAND	51°48'20.4"N	18°40'24.1"E	51.8057	18.6734	JEZIORSKO	JEZIORSKO	D_P	HYDRO	D	2.5	.	5	.	35.8	2.88	32.92	0.92	L	0.886642	9014	5.7	1986	1987	1	9	A	11	.	.	.	N	.	.	1
Large dam reservoirs are probably long-period oscillators of fish diversity	Journal of Fish Biology	2012	JOURNAL	Ł. Głowacki, T. Penczak	https://onlinelibrary.wiley.com/doi/abs/10.1111/j.1095-8649.2012.03274.x	12	G&P2000	8	39	4	32	T	Temperate_floodplain_rivers_and_wetlands	Central_and_western_Europe	POLAND	51°48'20.4"N	18°40'24.1"E	51.8057	18.6734	JEZIORSKO	JEZIORSKO	D_P	HYDRO	D	2.5	.	5	.	35.8	2.88	32.92	0.92	L	0.886642	9014	5.7	1986	1989	3	9	A	11	.	.	.	N	.	.	1
Large dam reservoirs are probably long-period oscillators of fish diversity	Journal of Fish Biology	2012	JOURNAL	Ł. Głowacki, T. Penczak	https://onlinelibrary.wiley.com/doi/abs/10.1111/j.1095-8649.2012.03274.x	12	G&P2000	8	40	5	32	T	Temperate_floodplain_rivers_and_wetlands	Central_and_western_Europe	POLAND	51°48'20.4"N	18°40'24.1"E	51.8057	18.6734	JEZIORSKO	JEZIORSKO	D_P	HYDRO	D	2.5	.	5	.	35.8	2.88	32.92	0.92	L	0.886642	9014	5.7	1986	1992	6	9	A	9	.	.	.	N	.	.	1
Large dam reservoirs are probably long-period oscillators of fish diversity	Journal of Fish Biology	2012	JOURNAL	Ł. Głowacki, T. Penczak	https://onlinelibrary.wiley.com/doi/abs/10.1111/j.1095-8649.2012.03274.x	12	G&P2000	8	41	6	32	T	Temperate_floodplain_rivers_and_wetlands	Central_and_western_Europe	POLAND	51°48'20.4"N	18°40'24.1"E	51.8057	18.6734	JEZIORSKO	JEZIORSKO	D_P	HYDRO	D	2.5	.	5	.	35.8	2.88	32.92	0.92	L	0.886642	9014	5.7	1986	1993	7	9	A	9	.	.	.	N	.	.	1
Large dam reservoirs are probably long-period oscillators of fish diversity	Journal of Fish Biology	2012	JOURNAL	Ł. Głowacki, T. Penczak	https://onlinelibrary.wiley.com/doi/abs/10.1111/j.1095-8649.2012.03274.x	12	G&P2000	8	42	7	32	T	Temperate_floodplain_rivers_and_wetlands	Central_and_western_Europe	POLAND	51°48'20.4"N	18°40'24.1"E	51.8057	18.6734	JEZIORSKO	JEZIORSKO	D_P	HYDRO	D	2.5	.	5	.	35.8	2.88	32.92	0.92	L	0.886642	9014	5.7	1986	1994	8	9	A	8	.	.	.	N	.	.	1
Large dam reservoirs are probably long-period oscillators of fish diversity	Journal of Fish Biology	2012	JOURNAL	Ł. Głowacki, T. Penczak	https://onlinelibrary.wiley.com/doi/abs/10.1111/j.1095-8649.2012.03274.x	12	G&P2000	8	43	8	32	T	Temperate_floodplain_rivers_and_wetlands	Central_and_western_Europe	POLAND	51°48'20.4"N	18°40'24.1"E	51.8057	18.6734	JEZIORSKO	JEZIORSKO	D_P	HYDRO	D	2.5	.	5	.	35.8	2.88	32.92	0.92	L	0.886642	9014	5.7	1986	1995	9	9	A	5	.	.	.	N	.	.	1
Large dam reservoirs are probably long-period oscillators of fish diversity	Journal of Fish Biology	2012	JOURNAL	Ł. Głowacki, T. Penczak	https://onlinelibrary.wiley.com/doi/abs/10.1111/j.1095-8649.2012.03274.x	12	G&P2000	10	44	1	33	T	Temperate_floodplain_rivers_and_wetlands	Central_and_western_Europe	POLAND	51°48'20.4"N	18°40'24.1"E	51.8057	18.6734	JEZIORSKO	JEZIORSKO	D_S	HYDRO	D	2.5	.	5	.	35.8	2.88	32.92	0.92	L	0.886642	9014	5.7	1986	1985	-1	9	B	12	.	.	.	N	.	.	1
Large dam reservoirs are probably long-period oscillators of fish diversity	Journal of Fish Biology	2012	JOURNAL	Ł. Głowacki, T. Penczak	https://onlinelibrary.wiley.com/doi/abs/10.1111/j.1095-8649.2012.03274.x	12	G&P2000	10	45	2	33	T	Temperate_floodplain_rivers_and_wetlands	Central_and_western_Europe	POLAND	51°48'20.4"N	18°40'24.1"E	51.8057	18.6734	JEZIORSKO	JEZIORSKO	D_S	HYDRO	D	2.5	.	5	.	35.8	2.88	32.92	0.92	L	0.886642	9014	5.7	1986	1986	0	9	A	11	.	.	.	N	.	.	1
Large dam reservoirs are probably long-period oscillators of fish diversity	Journal of Fish Biology	2012	JOURNAL	Ł. Głowacki, T. Penczak	https://onlinelibrary.wiley.com/doi/abs/10.1111/j.1095-8649.2012.03274.x	12	G&P2000	10	46	3	33	T	Temperate_floodplain_rivers_and_wetlands	Central_and_western_Europe	POLAND	51°48'20.4"N	18°40'24.1"E	51.8057	18.6734	JEZIORSKO	JEZIORSKO	D_S	HYDRO	D	2.5	.	5	.	35.8	2.88	32.92	0.92	L	0.886642	9014	5.7	1986	1987	1	9	A	12	.	.	.	N	.	.	1
Large dam reservoirs are probably long-period oscillators of fish diversity	Journal of Fish Biology	2012	JOURNAL	Ł. Głowacki, T. Penczak	https://onlinelibrary.wiley.com/doi/abs/10.1111/j.1095-8649.2012.03274.x	12	G&P2000	10	47	4	33	T	Temperate_floodplain_rivers_and_wetlands	Central_and_western_Europe	POLAND	51°48'20.4"N	18°40'24.1"E	51.8057	18.6734	JEZIORSKO	JEZIORSKO	D_S	HYDRO	D	2.5	.	5	.	35.8	2.88	32.92	0.92	L	0.886642	9014	5.7	1986	1988	2	9	A	10	.	.	.	N	.	.	1
Large dam reservoirs are probably long-period oscillators of fish diversity	Journal of Fish Biology	2012	JOURNAL	Ł. Głowacki, T. Penczak	https://onlinelibrary.wiley.com/doi/abs/10.1111/j.1095-8649.2012.03274.x	12	G&P2000	10	48	5	33	T	Temperate_floodplain_rivers_and_wetlands	Central_and_western_Europe	POLAND	51°48'20.4"N	18°40'24.1"E	51.8057	18.6734	JEZIORSKO	JEZIORSKO	D_S	HYDRO	D	2.5	.	5	.	35.8	2.88	32.92	0.92	L	0.886642	9014	5.7	1986	1989	3	9	A	9	.	.	.	N	.	.	1
Large dam reservoirs are probably long-period oscillators of fish diversity	Journal of Fish Biology	2012	JOURNAL	Ł. Głowacki, T. Penczak	https://onlinelibrary.wiley.com/doi/abs/10.1111/j.1095-8649.2012.03274.x	12	G&P2000	10	49	6	33	T	Temperate_floodplain_rivers_and_wetlands	Central_and_western_Europe	POLAND	51°48'20.4"N	18°40'24.1"E	51.8057	18.6734	JEZIORSKO	JEZIORSKO	D_S	HYDRO	D	2.5	.	5	.	35.8	2.88	32.92	0.92	L	0.886642	9014	5.7	1986	1990	4	9	A	8	.	.	.	N	.	.	1
Large dam reservoirs are probably long-period oscillators of fish diversity	Journal of Fish Biology	2012	JOURNAL	Ł. Głowacki, T. Penczak	https://onlinelibrary.wiley.com/doi/abs/10.1111/j.1095-8649.2012.03274.x	12	G&P2000	10	50	7	33	T	Temperate_floodplain_rivers_and_wetlands	Central_and_western_Europe	POLAND	51°48'20.4"N	18°40'24.1"E	51.8057	18.6734	JEZIORSKO	JEZIORSKO	D_S	HYDRO	D	2.5	.	5	.	35.8	2.88	32.92	0.92	L	0.886642	9014	5.7	1986	1991	5	9	A	8	.	.	.	N	.	.	1
Large dam reservoirs are probably long-period oscillators of fish diversity	Journal of Fish Biology	2012	JOURNAL	Ł. Głowacki, T. Penczak	https://onlinelibrary.wiley.com/doi/abs/10.1111/j.1095-8649.2012.03274.x	12	G&P2000	10	51	8	33	T	Temperate_floodplain_rivers_and_wetlands	Central_and_western_Europe	POLAND	51°48'20.4"N	18°40'24.1"E	51.8057	18.6734	JEZIORSKO	JEZIORSKO	D_S	HYDRO	D	2.5	.	5	.	35.8	2.88	32.92	0.92	L	0.886642	9014	5.7	1986	1993	7	9	A	5	.	.	.	N	.	.	1
Large dam reservoirs are probably long-period oscillators of fish diversity	Journal of Fish Biology	2012	JOURNAL	Ł. Głowacki, T. Penczak	https://onlinelibrary.wiley.com/doi/abs/10.1111/j.1095-8649.2012.03274.x	12	G&P2000	10	52	9	33	T	Temperate_floodplain_rivers_and_wetlands	Central_and_western_Europe	POLAND	51°48'20.4"N	18°40'24.1"E	51.8057	18.6734	JEZIORSKO	JEZIORSKO	D_S	HYDRO	D	2.5	.	5	.	35.8	2.88	32.92	0.92	L	0.886642	9014	5.7	1986	1994	8	9	A	5	.	.	.	N	.	.	1
Large dam reservoirs are probably long-period oscillators of fish diversity	Journal of Fish Biology	2012	JOURNAL	Ł. Głowacki, T. Penczak	https://onlinelibrary.wiley.com/doi/abs/10.1111/j.1095-8649.2012.03274.x	12	G&P2000	10	53	10	33	T	Temperate_floodplain_rivers_and_wetlands	Central_and_western_Europe	POLAND	51°48'20.4"N	18°40'24.1"E	51.8057	18.6734	JEZIORSKO	JEZIORSKO	D_S	HYDRO	D	2.5	.	5	.	35.8	2.88	32.92	0.92	L	0.886642	9014	5.7	1986	1995	9	9	A	5	.	.	.	N	.	.	1
Effects of the construction of a reservoir on the fish assemblage in an inflow river	Czech Journal of Animal Science - UZPI (Czech Republic)	2008	JOURNAL	Milan Hladík, Jan Kubečka, Tomáš Mrkvička, Martin Čech, Vladislav Draštík, Jaroslava Frouzová, Eva Hohausová, Josef Matěna, V Matěnová, Michal Kratochvíl, Jiří Peterka, Marie Prchalová, Mojmír Vašek	https://www.google.com/url?sa=t&rct=j&q=&esrc=s&source=web&cd=2&cad=rja&uact=8&ved=0ahUKEwiop82E5ezaAhXEjVkKHUVeCqMQFggvMAE&url=http%3A%2F%2Fciteseerx.ist.psu.edu%2Fviewdoc%2Fdownload%3Fdoi%3D10.1.1.627.694%26rep%3Drep1%26type%3Dpdf&usg=AOvVaw2P-kpnNHCwh7_eQNr1kLK6	13	HLAD2008	2	1	1	34	T	Temperate_floodplain_rivers_and_wetlands	Central_and_western_Europe	CZECH_R.	48°50'03.9"N	14°28'59.1"E	48.8344	14.4831	RIMOV	RIMOV	B	WATER_SUP	UR	19.19	.	.	.	1.3	0.33	0.97	0.74	L	8.97308	482	25.8	1978	1977	-1	23	B	15	.	1.8	0.665	Y	2.999	0.237	1
Effects of the construction of a reservoir on the fish assemblage in an inflow river	Czech Journal of Animal Science - UZPI (Czech Republic)	2008	JOURNAL	Milan Hladík, Jan Kubečka, Tomáš Mrkvička, Martin Čech, Vladislav Draštík, Jaroslava Frouzová, Eva Hohausová, Josef Matěna, V Matěnová, Michal Kratochvíl, Jiří Peterka, Marie Prchalová, Mojmír Vašek	https://www.google.com/url?sa=t&rct=j&q=&esrc=s&source=web&cd=2&cad=rja&uact=8&ved=0ahUKEwiop82E5ezaAhXEjVkKHUVeCqMQFggvMAE&url=http%3A%2F%2Fciteseerx.ist.psu.edu%2Fviewdoc%2Fdownload%3Fdoi%3D10.1.1.627.694%26rep%3Drep1%26type%3Dpdf&usg=AOvVaw2P-kpnNHCwh7_eQNr1kLK6	13	HLAD2008	2	2	2	34	T	Temperate_floodplain_rivers_and_wetlands	Central_and_western_Europe	CZECH_R.	48°50'03.9"N	14°28'59.1"E	48.8344	14.4831	RIMOV	RIMOV	B	WATER_SUP	UR	19.19	.	.	.	1.3	0.33	0.97	0.74	L	8.97308	482	25.8	1978	2001	23	23	A	12	.	1.7	0.684	Y	3.075	0.677	1
Effects of the construction of a reservoir on the fish assemblage in an inflow river	Czech Journal of Animal Science - UZPI (Czech Republic)	2008	JOURNAL	Milan Hladík, Jan Kubečka, Tomáš Mrkvička, Martin Čech, Vladislav Draštík, Jaroslava Frouzová, Eva Hohausová, Josef Matěna, V Matěnová, Michal Kratochvíl, Jiří Peterka, Marie Prchalová, Mojmír Vašek	https://www.google.com/url?sa=t&rct=j&q=&esrc=s&source=web&cd=2&cad=rja&uact=8&ved=0ahUKEwiop82E5ezaAhXEjVkKHUVeCqMQFggvMAE&url=http%3A%2F%2Fciteseerx.ist.psu.edu%2Fviewdoc%2Fdownload%3Fdoi%3D10.1.1.627.694%26rep%3Drep1%26type%3Dpdf&usg=AOvVaw2P-kpnNHCwh7_eQNr1kLK6	13	HLAD2008	3	3	1	35	T	Temperate_floodplain_rivers_and_wetlands	Central_and_western_Europe	CZECH_R.	48°50'03.9"N	14°28'59.1"E	48.8344	14.4831	RIMOV	RIMOV	C	WATER_SUP	UR	14.33	.	.	.	1.3	0.33	0.97	0.74	L	8.97308	482	25.8	1978	1977	-1	23	B	15	.	1.8	0.665	Y	3.527	0.527	1
Effects of the construction of a reservoir on the fish assemblage in an inflow river	Czech Journal of Animal Science - UZPI (Czech Republic)	2008	JOURNAL	Milan Hladík, Jan Kubečka, Tomáš Mrkvička, Martin Čech, Vladislav Draštík, Jaroslava Frouzová, Eva Hohausová, Josef Matěna, V Matěnová, Michal Kratochvíl, Jiří Peterka, Marie Prchalová, Mojmír Vašek	https://www.google.com/url?sa=t&rct=j&q=&esrc=s&source=web&cd=2&cad=rja&uact=8&ved=0ahUKEwiop82E5ezaAhXEjVkKHUVeCqMQFggvMAE&url=http%3A%2F%2Fciteseerx.ist.psu.edu%2Fviewdoc%2Fdownload%3Fdoi%3D10.1.1.627.694%26rep%3Drep1%26type%3Dpdf&usg=AOvVaw2P-kpnNHCwh7_eQNr1kLK6	13	HLAD2008	3	4	2	35	T	Temperate_floodplain_rivers_and_wetlands	Central_and_western_Europe	CZECH_R.	48°50'03.9"N	14°28'59.1"E	48.8344	14.4831	RIMOV	RIMOV	C	WATER_SUP	UR	14.33	.	.	.	1.3	0.33	0.97	0.74	L	8.97308	482	25.8	1978	1985	7	23	A	12	.	1.65	0.664	Y	3.282	0.399	1
Effects of the construction of a reservoir on the fish assemblage in an inflow river	Czech Journal of Animal Science - UZPI (Czech Republic)	2008	JOURNAL	Milan Hladík, Jan Kubečka, Tomáš Mrkvička, Martin Čech, Vladislav Draštík, Jaroslava Frouzová, Eva Hohausová, Josef Matěna, V Matěnová, Michal Kratochvíl, Jiří Peterka, Marie Prchalová, Mojmír Vašek	https://www.google.com/url?sa=t&rct=j&q=&esrc=s&source=web&cd=2&cad=rja&uact=8&ved=0ahUKEwiop82E5ezaAhXEjVkKHUVeCqMQFggvMAE&url=http%3A%2F%2Fciteseerx.ist.psu.edu%2Fviewdoc%2Fdownload%3Fdoi%3D10.1.1.627.694%26rep%3Drep1%26type%3Dpdf&usg=AOvVaw2P-kpnNHCwh7_eQNr1kLK6	13	HLAD2008	3	5	3	35	T	Temperate_floodplain_rivers_and_wetlands	Central_and_western_Europe	CZECH_R.	48°50'03.9"N	14°28'59.1"E	48.8344	14.4831	RIMOV	RIMOV	C	WATER_SUP	UR	14.33	.	.	.	1.3	0.33	0.97	0.74	L	8.97308	482	25.8	1978	2001	23	23	A	12	.	1.45	0.584	Y	3.208	0.867	1
Effects of the construction of a reservoir on the fish assemblage in an inflow river	Czech Journal of Animal Science - UZPI (Czech Republic)	2008	JOURNAL	Milan Hladík, Jan Kubečka, Tomáš Mrkvička, Martin Čech, Vladislav Draštík, Jaroslava Frouzová, Eva Hohausová, Josef Matěna, V Matěnová, Michal Kratochvíl, Jiří Peterka, Marie Prchalová, Mojmír Vašek	https://www.google.com/url?sa=t&rct=j&q=&esrc=s&source=web&cd=2&cad=rja&uact=8&ved=0ahUKEwiop82E5ezaAhXEjVkKHUVeCqMQFggvMAE&url=http%3A%2F%2Fciteseerx.ist.psu.edu%2Fviewdoc%2Fdownload%3Fdoi%3D10.1.1.627.694%26rep%3Drep1%26type%3Dpdf&usg=AOvVaw2P-kpnNHCwh7_eQNr1kLK6	13	HLAD2008	3	6	1	36	T	Temperate_floodplain_rivers_and_wetlands	Central_and_western_Europe	CZECH_R.	48°50'03.9"N	14°28'59.1"E	48.8344	14.4831	RIMOV	RIMOV	D	WATER_SUP	UD	12.27	.	.	.	1.3	0.33	0.97	0.74	L	8.97308	482	25.8	1978	1977	-1	23	B	15	.	1.8	0.665	Y	3.067	0.712	1
Effects of the construction of a reservoir on the fish assemblage in an inflow river	Czech Journal of Animal Science - UZPI (Czech Republic)	2008	JOURNAL	Milan Hladík, Jan Kubečka, Tomáš Mrkvička, Martin Čech, Vladislav Draštík, Jaroslava Frouzová, Eva Hohausová, Josef Matěna, V Matěnová, Michal Kratochvíl, Jiří Peterka, Marie Prchalová, Mojmír Vašek	https://www.google.com/url?sa=t&rct=j&q=&esrc=s&source=web&cd=2&cad=rja&uact=8&ved=0ahUKEwiop82E5ezaAhXEjVkKHUVeCqMQFggvMAE&url=http%3A%2F%2Fciteseerx.ist.psu.edu%2Fviewdoc%2Fdownload%3Fdoi%3D10.1.1.627.694%26rep%3Drep1%26type%3Dpdf&usg=AOvVaw2P-kpnNHCwh7_eQNr1kLK6	13	HLAD2008	3	7	2	36	T	Temperate_floodplain_rivers_and_wetlands	Central_and_western_Europe	CZECH_R.	48°50'03.9"N	14°28'59.1"E	48.8344	14.4831	RIMOV	RIMOV	D	WATER_SUP	UD	12.27	.	.	.	1.3	0.33	0.97	0.74	L	8.97308	482	25.8	1978	1986	8	23	A	8.5	.	1.35	0.631	Y	3.827	0.804	1
Effects of the construction of a reservoir on the fish assemblage in an inflow river	Czech Journal of Animal Science - UZPI (Czech Republic)	2008	JOURNAL	Milan Hladík, Jan Kubečka, Tomáš Mrkvička, Martin Čech, Vladislav Draštík, Jaroslava Frouzová, Eva Hohausová, Josef Matěna, V Matěnová, Michal Kratochvíl, Jiří Peterka, Marie Prchalová, Mojmír Vašek	https://www.google.com/url?sa=t&rct=j&q=&esrc=s&source=web&cd=2&cad=rja&uact=8&ved=0ahUKEwiop82E5ezaAhXEjVkKHUVeCqMQFggvMAE&url=http%3A%2F%2Fciteseerx.ist.psu.edu%2Fviewdoc%2Fdownload%3Fdoi%3D10.1.1.627.694%26rep%3Drep1%26type%3Dpdf&usg=AOvVaw2P-kpnNHCwh7_eQNr1kLK6	13	HLAD2008	3	8	3	36	T	Temperate_floodplain_rivers_and_wetlands	Central_and_western_Europe	CZECH_R.	48°50'03.9"N	14°28'59.1"E	48.8344	14.4831	RIMOV	RIMOV	D	WATER_SUP	UD	12.27	.	.	.	1.3	0.33	0.97	0.74	L	8.97308	482	25.8	1978	2001	23	23	A	17.5	.	1.45	0.507	Y	3.255	0.475	1
Effects of the construction of a reservoir on the fish assemblage in an inflow river	Czech Journal of Animal Science - UZPI (Czech Republic)	2008	JOURNAL	Milan Hladík, Jan Kubečka, Tomáš Mrkvička, Martin Čech, Vladislav Draštík, Jaroslava Frouzová, Eva Hohausová, Josef Matěna, V Matěnová, Michal Kratochvíl, Jiří Peterka, Marie Prchalová, Mojmír Vašek	https://www.google.com/url?sa=t&rct=j&q=&esrc=s&source=web&cd=2&cad=rja&uact=8&ved=0ahUKEwiop82E5ezaAhXEjVkKHUVeCqMQFggvMAE&url=http%3A%2F%2Fciteseerx.ist.psu.edu%2Fviewdoc%2Fdownload%3Fdoi%3D10.1.1.627.694%26rep%3Drep1%26type%3Dpdf&usg=AOvVaw2P-kpnNHCwh7_eQNr1kLK6	13	HLAD2008	2	9	1	37	T	Temperate_floodplain_rivers_and_wetlands	Central_and_western_Europe	CZECH_R.	48°50'03.9"N	14°28'59.1"E	48.8344	14.4831	RIMOV	RIMOV	E	WATER_SUP	UD	11.37	.	.	.	1.3	0.33	0.97	0.74	L	8.97308	482	25.8	1978	1977	-1	23	B	15	.	1.8	0.665	Y	3.152	0.897	1
Effects of the construction of a reservoir on the fish assemblage in an inflow river	Czech Journal of Animal Science - UZPI (Czech Republic)	2008	JOURNAL	Milan Hladík, Jan Kubečka, Tomáš Mrkvička, Martin Čech, Vladislav Draštík, Jaroslava Frouzová, Eva Hohausová, Josef Matěna, V Matěnová, Michal Kratochvíl, Jiří Peterka, Marie Prchalová, Mojmír Vašek	https://www.google.com/url?sa=t&rct=j&q=&esrc=s&source=web&cd=2&cad=rja&uact=8&ved=0ahUKEwiop82E5ezaAhXEjVkKHUVeCqMQFggvMAE&url=http%3A%2F%2Fciteseerx.ist.psu.edu%2Fviewdoc%2Fdownload%3Fdoi%3D10.1.1.627.694%26rep%3Drep1%26type%3Dpdf&usg=AOvVaw2P-kpnNHCwh7_eQNr1kLK6	13	HLAD2008	2	10	2	37	T	Temperate_floodplain_rivers_and_wetlands	Central_and_western_Europe	CZECH_R.	48°50'03.9"N	14°28'59.1"E	48.8344	14.4831	RIMOV	RIMOV	E	WATER_SUP	UD	11.37	.	.	.	1.3	0.33	0.97	0.74	L	8.97308	482	25.8	1978	2001	23	23	A	9	.	0.9	0.41	Y	3.099	0.885	1
Effects of the construction of a reservoir on the fish assemblage in an inflow river	Czech Journal of Animal Science - UZPI (Czech Republic)	2008	JOURNAL	Milan Hladík, Jan Kubečka, Tomáš Mrkvička, Martin Čech, Vladislav Draštík, Jaroslava Frouzová, Eva Hohausová, Josef Matěna, V Matěnová, Michal Kratochvíl, Jiří Peterka, Marie Prchalová, Mojmír Vašek	https://www.google.com/url?sa=t&rct=j&q=&esrc=s&source=web&cd=2&cad=rja&uact=8&ved=0ahUKEwiop82E5ezaAhXEjVkKHUVeCqMQFggvMAE&url=http%3A%2F%2Fciteseerx.ist.psu.edu%2Fviewdoc%2Fdownload%3Fdoi%3D10.1.1.627.694%26rep%3Drep1%26type%3Dpdf&usg=AOvVaw2P-kpnNHCwh7_eQNr1kLK6	13	HLAD2008	3	11	1	38	T	Temperate_floodplain_rivers_and_wetlands	Central_and_western_Europe	CZECH_R.	48°50'03.9"N	14°28'59.1"E	48.8344	14.4831	RIMOV	RIMOV	F	WATER_SUP	UD	6.45	.	.	.	1.3	0.33	0.97	0.74	L	8.97308	482	25.8	1978	1977	-1	23	B	15	.	1.8	0.665	Y	3.306	0.952	1
Effects of the construction of a reservoir on the fish assemblage in an inflow river	Czech Journal of Animal Science - UZPI (Czech Republic)	2008	JOURNAL	Milan Hladík, Jan Kubečka, Tomáš Mrkvička, Martin Čech, Vladislav Draštík, Jaroslava Frouzová, Eva Hohausová, Josef Matěna, V Matěnová, Michal Kratochvíl, Jiří Peterka, Marie Prchalová, Mojmír Vašek	https://www.google.com/url?sa=t&rct=j&q=&esrc=s&source=web&cd=2&cad=rja&uact=8&ved=0ahUKEwiop82E5ezaAhXEjVkKHUVeCqMQFggvMAE&url=http%3A%2F%2Fciteseerx.ist.psu.edu%2Fviewdoc%2Fdownload%3Fdoi%3D10.1.1.627.694%26rep%3Drep1%26type%3Dpdf&usg=AOvVaw2P-kpnNHCwh7_eQNr1kLK6	13	HLAD2008	3	12	2	38	T	Temperate_floodplain_rivers_and_wetlands	Central_and_western_Europe	CZECH_R.	48°50'03.9"N	14°28'59.1"E	48.8344	14.4831	RIMOV	RIMOV	F	WATER_SUP	UD	6.45	.	.	.	1.3	0.33	0.97	0.74	L	8.97308	482	25.8	1978	1985	7	23	A	13	.	0.9	0.351	Y	3.972	0.987	1
Effects of the construction of a reservoir on the fish assemblage in an inflow river	Czech Journal of Animal Science - UZPI (Czech Republic)	2008	JOURNAL	Milan Hladík, Jan Kubečka, Tomáš Mrkvička, Martin Čech, Vladislav Draštík, Jaroslava Frouzová, Eva Hohausová, Josef Matěna, V Matěnová, Michal Kratochvíl, Jiří Peterka, Marie Prchalová, Mojmír Vašek	https://www.google.com/url?sa=t&rct=j&q=&esrc=s&source=web&cd=2&cad=rja&uact=8&ved=0ahUKEwiop82E5ezaAhXEjVkKHUVeCqMQFggvMAE&url=http%3A%2F%2Fciteseerx.ist.psu.edu%2Fviewdoc%2Fdownload%3Fdoi%3D10.1.1.627.694%26rep%3Drep1%26type%3Dpdf&usg=AOvVaw2P-kpnNHCwh7_eQNr1kLK6	13	HLAD2008	3	13	3	38	T	Temperate_floodplain_rivers_and_wetlands	Central_and_western_Europe	CZECH_R.	48°50'03.9"N	14°28'59.1"E	48.8344	14.4831	RIMOV	RIMOV	F	WATER_SUP	UD	6.45	.	.	.	1.3	0.33	0.97	0.74	L	8.97308	482	25.8	1978	2001	23	23	A	15	.	1.6	0.591	Y	3.145	0.954	1
The Effect of Hypolimnion Reservoir Releases on Fish Distribution and Species Diversity	Transactions of the American Fisheries Society	1978	JOURNAL	Robert J. Edwards	https://www.tandfonline.com/doi/abs/10.1577/1548-8659(1978)107%3C71:TEOHRR%3E2.0.CO;2#.Uu__irTwDpc	14	EDW1978	4	1	1	39	T	Temperate_coastal_rivers	East_Texas_Gulf	USA	28°29'29.7"N	98°18'27.2"W	28.4916	-98.3076	CANYON	CANYON	1	MULTI	.	.	6	.	.	30.6	2.21	28.4	0.93	L	2.7454	3691	45.5	1958	1951	-7	18	B	22	1	.	.	N	.	.	1
The Effect of Hypolimnion Reservoir Releases on Fish Distribution and Species Diversity	Transactions of the American Fisheries Society	1978	JOURNAL	Robert J. Edwards	https://www.tandfonline.com/doi/abs/10.1577/1548-8659(1978)107%3C71:TEOHRR%3E2.0.CO;2#.Uu__irTwDpc	14	EDW1978	4	2	2	39	T	Temperate_coastal_rivers	East_Texas_Gulf	USA	28°29'29.7"N	98°18'27.2"W	28.4916	-98.3076	CANYON	CANYON	1	MULTI	UR	.	6	.	.	30.6	2.21	28.4	0.93	L	2.7454	3691	45.5	1958	1976	18	18	A	22	3	.	.	N	.	.	1
The Effect of Hypolimnion Reservoir Releases on Fish Distribution and Species Diversity	Transactions of the American Fisheries Society	1978	JOURNAL	Robert J. Edwards	https://www.tandfonline.com/doi/abs/10.1577/1548-8659(1978)107%3C71:TEOHRR%3E2.0.CO;2#.Uu__irTwDpc	14	EDW1978	4	3	3	39	T	Temperate_coastal_rivers	East_Texas_Gulf	USA	28°29'29.7"N	98°18'27.2"W	28.4916	-98.3076	CANYON	CANYON	2	MULTI	.	.	6	.	.	30.6	2.21	28.4	0.93	L	2.7454	3691	45.5	1958	1951	-7	18	B	24	2	.	.	N	.	.	1
The Effect of Hypolimnion Reservoir Releases on Fish Distribution and Species Diversity	Transactions of the American Fisheries Society	1978	JOURNAL	Robert J. Edwards	https://www.tandfonline.com/doi/abs/10.1577/1548-8659(1978)107%3C71:TEOHRR%3E2.0.CO;2#.Uu__irTwDpc	14	EDW1978	4	4	4	39	T	Temperate_coastal_rivers	East_Texas_Gulf	USA	28°29'29.7"N	98°18'27.2"W	28.4916	-98.3076	CANYON	CANYON	2	MULTI	D	.	6	.	.	30.6	2.21	28.4	0.93	L	2.7454	3691	45.5	1958	1976	18	18	A	18	5	.	.	N	.	.	1
Long-Term Changes in the Fish Assemblages of the Big Blue River Basin 40 Years after the Construction of Tuttle Creek Reservoir	Transactions of the Kansas Academy of Science	2002	JOURNAL	Keith B. Gido, Christopher S. Guy, Timothy R. Strakosh, Randal J. Bernot, Kristen J. Hase, and Mark A. Shaw	http://www.bioone.org/doi/abs/10.1660/0022-8443(2002)105%5B0193:LTCITF%5D2.0.CO%3B2	15	GIDO2002	3	1	1	40	T	Temperate_floodplain_rivers_and_wetlands	Middle_Missouri	USA	39°20'25.3"N	96°40'07.3"W	39.3404	-96.6687	TUTTLE	TUTTLE	S	FLOOD_CONT	UR	.	.	.	.	42.9	4.06	38.84	0.91	L	1.68097	24936	64.9	1962	1951	-11	39	B	20	0	1.295	0.432	Y	2.804	0.704	0
Long-Term Changes in the Fish Assemblages of the Big Blue River Basin 40 Years after the Construction of Tuttle Creek Reservoir	Transactions of the Kansas Academy of Science	2002	JOURNAL	Keith B. Gido, Christopher S. Guy, Timothy R. Strakosh, Randal J. Bernot, Kristen J. Hase, and Mark A. Shaw	http://www.bioone.org/doi/abs/10.1660/0022-8443(2002)105%5B0193:LTCITF%5D2.0.CO%3B2	15	GIDO2002	3	2	2	40	T	Temperate_floodplain_rivers_and_wetlands	Middle_Missouri	USA	39°20'25.3"N	96°40'07.3"W	39.3404	-96.6687	TUTTLE	TUTTLE	S	FLOOD_CONT	UR	.	.	.	.	42.9	4.06	38.84	0.91	L	1.68097	24936	64.9	1962	1997	35	39	A	22	1	1.264	0.409	Y	2.798	0.798	0
Long-Term Changes in the Fish Assemblages of the Big Blue River Basin 40 Years after the Construction of Tuttle Creek Reservoir	Transactions of the Kansas Academy of Science	2002	JOURNAL	Keith B. Gido, Christopher S. Guy, Timothy R. Strakosh, Randal J. Bernot, Kristen J. Hase, and Mark A. Shaw	http://www.bioone.org/doi/abs/10.1660/0022-8443(2002)105%5B0193:LTCITF%5D2.0.CO%3B2	15	GIDO2002	3	3	3	40	T	Temperate_floodplain_rivers_and_wetlands	Middle_Missouri	USA	39°20'25.3"N	96°40'07.3"W	39.3404	-96.6687	TUTTLE	TUTTLE	S	FLOOD_CONT	UR	.	.	.	.	42.9	4.06	38.84	0.91	L	1.68097	24936	64.9	1962	2001	39	39	A	14	2	0.878	0.333	Y	2.836	0.957	0
Long-Term Changes in the Fish Assemblages of the Big Blue River Basin 40 Years after the Construction of Tuttle Creek Reservoir	Transactions of the Kansas Academy of Science	2002	JOURNAL	Keith B. Gido, Christopher S. Guy, Timothy R. Strakosh, Randal J. Bernot, Kristen J. Hase, and Mark A. Shaw	http://www.bioone.org/doi/abs/10.1660/0022-8443(2002)105%5B0193:LTCITF%5D2.0.CO%3B2	15	GIDO2002	3	4	1	41	T	Temperate_floodplain_rivers_and_wetlands	Middle_Missouri	USA	39°20'25.3"N	96°40'07.3"W	39.3404	-96.6687	TUTTLE	TUTTLE	M	FLOOD_CONT	UR	.	.	.	.	42.9	4.06	38.84	0.91	L	1.68097	24936	64.9	1962	1951	-11	39	B	16	0	2.003	0.723	Y	2.902	0.923	0
Long-Term Changes in the Fish Assemblages of the Big Blue River Basin 40 Years after the Construction of Tuttle Creek Reservoir	Transactions of the Kansas Academy of Science	2002	JOURNAL	Keith B. Gido, Christopher S. Guy, Timothy R. Strakosh, Randal J. Bernot, Kristen J. Hase, and Mark A. Shaw	http://www.bioone.org/doi/abs/10.1660/0022-8443(2002)105%5B0193:LTCITF%5D2.0.CO%3B2	15	GIDO2002	3	5	2	41	T	Temperate_floodplain_rivers_and_wetlands	Middle_Missouri	USA	39°20'25.3"N	96°40'07.3"W	39.3404	-96.6687	TUTTLE	TUTTLE	M	FLOOD_CONT	UR	.	.	.	.	42.9	4.06	38.84	0.91	L	1.68097	24936	64.9	1962	1997	35	39	A	32	1	1.768	0.51	Y	2.793	0.702	0
Long-Term Changes in the Fish Assemblages of the Big Blue River Basin 40 Years after the Construction of Tuttle Creek Reservoir	Transactions of the Kansas Academy of Science	2002	JOURNAL	Keith B. Gido, Christopher S. Guy, Timothy R. Strakosh, Randal J. Bernot, Kristen J. Hase, and Mark A. Shaw	http://www.bioone.org/doi/abs/10.1660/0022-8443(2002)105%5B0193:LTCITF%5D2.0.CO%3B2	15	GIDO2002	3	6	3	41	T	Temperate_floodplain_rivers_and_wetlands	Middle_Missouri	USA	39°20'25.3"N	96°40'07.3"W	39.3404	-96.6687	TUTTLE	TUTTLE	M	FLOOD_CONT	UR	.	.	.	.	42.9	4.06	38.84	0.91	L	1.68097	24936	64.9	1962	2001	39	39	A	22	2	1.166	0.377	Y	2.795	0.924	0
Long-Term Changes in the Fish Assemblages of the Big Blue River Basin 40 Years after the Construction of Tuttle Creek Reservoir	Transactions of the Kansas Academy of Science	2002	JOURNAL	Keith B. Gido, Christopher S. Guy, Timothy R. Strakosh, Randal J. Bernot, Kristen J. Hase, and Mark A. Shaw	http://www.bioone.org/doi/abs/10.1660/0022-8443(2002)105%5B0193:LTCITF%5D2.0.CO%3B2	15	GIDO2002	3	7	1	42	T	Temperate_floodplain_rivers_and_wetlands	Middle_Missouri	USA	39°20'25.3"N	96°40'07.3"W	39.3404	-96.6687	TUTTLE	TUTTLE	G	FLOOD_CONT	UR	.	.	.	.	42.9	4.06	38.84	0.91	L	1.68097	24936	64.9	1962	1951	-11	39	B	24	0	1.737	0.546	Y	2.801	0.786	0
Long-Term Changes in the Fish Assemblages of the Big Blue River Basin 40 Years after the Construction of Tuttle Creek Reservoir	Transactions of the Kansas Academy of Science	2002	JOURNAL	Keith B. Gido, Christopher S. Guy, Timothy R. Strakosh, Randal J. Bernot, Kristen J. Hase, and Mark A. Shaw	http://www.bioone.org/doi/abs/10.1660/0022-8443(2002)105%5B0193:LTCITF%5D2.0.CO%3B2	15	GIDO2002	3	8	2	42	T	Temperate_floodplain_rivers_and_wetlands	Middle_Missouri	USA	39°20'25.3"N	96°40'07.3"W	39.3404	-96.6687	TUTTLE	TUTTLE	G	FLOOD_CONT	UR	.	.	.	.	42.9	4.06	38.84	0.91	L	1.68097	24936	64.9	1962	1997	35	39	A	31	1	2.01	0.585	Y	2.605	0.493	0
Long-Term Changes in the Fish Assemblages of the Big Blue River Basin 40 Years after the Construction of Tuttle Creek Reservoir	Transactions of the Kansas Academy of Science	2002	JOURNAL	Keith B. Gido, Christopher S. Guy, Timothy R. Strakosh, Randal J. Bernot, Kristen J. Hase, and Mark A. Shaw	http://www.bioone.org/doi/abs/10.1660/0022-8443(2002)105%5B0193:LTCITF%5D2.0.CO%3B2	15	GIDO2002	3	9	3	42	T	Temperate_floodplain_rivers_and_wetlands	Middle_Missouri	USA	39°20'25.3"N	96°40'07.3"W	39.3404	-96.6687	TUTTLE	TUTTLE	G	FLOOD_CONT	UR	.	.	.	.	42.9	4.06	38.84	0.91	L	1.68097	24936	64.9	1962	2001	39	39	A	21	2	0.597	0.196	Y	2.823	0.978	0
Long-Term Changes in the Fish Assemblages of the Big Blue River Basin 40 Years after the Construction of Tuttle Creek Reservoir	Transactions of the Kansas Academy of Science	2002	JOURNAL	Keith B. Gido, Christopher S. Guy, Timothy R. Strakosh, Randal J. Bernot, Kristen J. Hase, and Mark A. Shaw	http://www.bioone.org/doi/abs/10.1660/0022-8443(2002)105%5B0193:LTCITF%5D2.0.CO%3B2	16	MER2005	2	1	1	43	TR	Tropical_and_subtropical_upland_rivers	Guianas	FRENCH_GUIANA	5°03'46.1"N	53°02'51.2"W	5.06281	-53.0476	PETIT-SAUT	PETIT-SAUT	1	HYDRO	D	25.5	0.5	4	.	365	9.59	355.41	0.97	D	0.18477	5927	84.3	1994	1992	-2	7	B	42	.	3.254	0.7	Y	2.632	0.325	0
Long-Term Changes in the Fish Assemblages of the Big Blue River Basin 40 Years after the Construction of Tuttle Creek Reservoir	Transactions of the Kansas Academy of Science	2002	JOURNAL	Keith B. Gido, Christopher S. Guy, Timothy R. Strakosh, Randal J. Bernot, Kristen J. Hase, and Mark A. Shaw	http://www.bioone.org/doi/abs/10.1660/0022-8443(2002)105%5B0193:LTCITF%5D2.0.CO%3B2	16	MER2005	2	2	2	43	TR	Tropical_and_subtropical_upland_rivers	Guianas	FRENCH_GUIANA	5°03'46.1"N	53°02'51.2"W	5.06281	-53.0476	PETIT-SAUT	PETIT-SAUT	1	HYDRO	D	25.5	0.5	4	.	365	9.59	355.41	0.97	D	0.18477	5927	84.3	1994	2001	7	7	A	35	.	3.223	0.723	Y	2.569	0.487	0
Long-Term Changes in the Fish Assemblages of the Big Blue River Basin 40 Years after the Construction of Tuttle Creek Reservoir	Transactions of the Kansas Academy of Science	2002	JOURNAL	Keith B. Gido, Christopher S. Guy, Timothy R. Strakosh, Randal J. Bernot, Kristen J. Hase, and Mark A. Shaw	http://www.bioone.org/doi/abs/10.1660/0022-8443(2002)105%5B0193:LTCITF%5D2.0.CO%3B2	17	MER2012	2	1	1	44	TR	Tropical_and_subtropical_upland_rivers	Guianas	FRENCH_GUIANA	5°03'46.1"N	53°02'51.2"W	5.06281	-53.0476	PETIT-SAUT	PETIT-SAUT	1	HYDRO	UD	.	0.5	4	.	365	9.59	355.41	0.97	D	0.18477	5927	84.3	1994	1994	0	8	B	54	0	2.527	0.628	Y	3.444	0.333	0
Long-Term Changes in the Fish Assemblages of the Big Blue River Basin 40 Years after the Construction of Tuttle Creek Reservoir	Transactions of the Kansas Academy of Science	2002	JOURNAL	Keith B. Gido, Christopher S. Guy, Timothy R. Strakosh, Randal J. Bernot, Kristen J. Hase, and Mark A. Shaw	http://www.bioone.org/doi/abs/10.1660/0022-8443(2002)105%5B0193:LTCITF%5D2.0.CO%3B2	17	MER2012	2	2	2	44	TR	Tropical_and_subtropical_upland_rivers	Guianas	FRENCH_GUIANA	5°03'46.1"N	53°02'51.2"W	5.06281	-53.0476	PETIT-SAUT	PETIT-SAUT	1	HYDRO	UD	.	0.5	4	.	365	9.59	355.41	0.97	D	0.18477	5927	84.3	1994	2002	8	8	A	39	0	2.365	0.637	Y	2.882	0.621	0
The fish fauna of Brokopondo Reservoir, Suriname, during 40 years of impoundment	Neotropical Ichthyology	2007	JOURNAL	Jan H. Mol; Bernard de Mérona; Paul E. Ouboter ; Shamita Sahdew	http://www.scielo.br/scielo.php?pid=S1679-62252007000300015&script=sci_arttext	18	MOL2007	4	1	1	45	TR	Tropical_and_subtropical_upland_rivers	Guianas	SURINAME	4°45'48.6"N	55°01'32.2"W	4.76351	-55.0256	BROKOPONDO	BROKOPONDO	1	HYDRO	UD	.	4	3.35	5.3	1560	41.06	1518.94	0.97	D	2.24141	12200	21.3	1964	1963	-1	41	B	172	0	4.11	0.8	Y	3.378	0.47	0
The fish fauna of Brokopondo Reservoir, Suriname, during 40 years of impoundment	Neotropical Ichthyology	2007	JOURNAL	Jan H. Mol; Bernard de Mérona; Paul E. Ouboter ; Shamita Sahdew	http://www.scielo.br/scielo.php?pid=S1679-62252007000300015&script=sci_arttext	18	MOL2007	4	2	2	45	TR	Tropical_and_subtropical_upland_rivers	Guianas	SURINAME	4°45'48.6"N	55°01'32.2"W	4.76351	-55.0256	BROKOPONDO	BROKOPONDO	1	HYDRO	UD	.	4	3.35	5.3	1560	41.06	1518.94	0.97	D	2.24141	12200	21.3	1964	1968	4	41	A	62	0	.	.	N			0
The fish fauna of Brokopondo Reservoir, Suriname, during 40 years of impoundment	Neotropical Ichthyology	2007	JOURNAL	Jan H. Mol; Bernard de Mérona; Paul E. Ouboter ; Shamita Sahdew	http://www.scielo.br/scielo.php?pid=S1679-62252007000300015&script=sci_arttext	18	MOL2007	4	3	3	45	TR	Tropical_and_subtropical_upland_rivers	Guianas	SURINAME	4°45'48.6"N	55°01'32.2"W	4.76351	-55.0256	BROKOPONDO	BROKOPONDO	1	HYDRO	UD	.	4	3.35	5.3	1560	41.06	1518.94	0.97	D	2.24141	12200	21.3	1964	1978	14	41	A	35	0	1.82	0.75	Y	3.722	0.795	0
The fish fauna of Brokopondo Reservoir, Suriname, during 40 years of impoundment	Neotropical Ichthyology	2007	JOURNAL	Jan H. Mol; Bernard de Mérona; Paul E. Ouboter ; Shamita Sahdew	http://www.scielo.br/scielo.php?pid=S1679-62252007000300015&script=sci_arttext	18	MOL2007	4	4	4	45	TR	Tropical_and_subtropical_upland_rivers	Guianas	SURINAME	4°45'48.6"N	55°01'32.2"W	4.76351	-55.0256	BROKOPONDO	BROKOPONDO	1	HYDRO	UD	.	4	3.35	5.3	1560	41.06	1518.94	0.97	D	2.24141	12200	21.3	1964	2005	41	41	A	41	0	2.17	0.6	Y	3.699	0.836	0
Alternative ways to measure impacts of dam closure to the structure of fish communities of a neotropical river	Ecohydrology	2016	JOURNAL	Ana Carolina Lima, Carlos Sérgio Agostinho, Amadeu M.V.M. Soares, Kieran A. Monaghan	https://onlinelibrary.wiley.com/doi/abs/10.1002/eco.1688	19	LIMA2016	3	1	1	46	TR	Tropical_and_subtropical_upland_rivers	Tocatins-Araguaia	BRAZIL	12°14'49.5"S	48°21'35.7"W	-12.2471	-48.3599	TOCANTINS	PEIXE_ANGICAL	1	HYDRO	D	1	.	.	.	294	51.62	242.39	0.82	D	2.20637	767000	9.3	2006	2004	-2	5	B	109.32	.	.	.	N	.	.	1
Alternative ways to measure impacts of dam closure to the structure of fish communities of a neotropical river	Ecohydrology	2016	JOURNAL	Ana Carolina Lima, Carlos Sérgio Agostinho, Amadeu M.V.M. Soares, Kieran A. Monaghan	https://onlinelibrary.wiley.com/doi/abs/10.1002/eco.1688	19	LIMA2016	3	2	2	46	TR	Tropical_and_subtropical_upland_rivers	Tocatins-Araguaia	BRAZIL	12°14'49.5"S	48°21'35.7"W	-12.2471	-48.3599	TOCANTINS	PEIXE_ANGICAL	1	HYDRO	D	1	.	.	.	294	51.62	242.39	0.82	D	2.20637	767000	9.3	2006	2007	1	5	A	125.2	.	.	.	N	.	.	1
Alternative ways to measure impacts of dam closure to the structure of fish communities of a neotropical river	Ecohydrology	2016	JOURNAL	Ana Carolina Lima, Carlos Sérgio Agostinho, Amadeu M.V.M. Soares, Kieran A. Monaghan	https://onlinelibrary.wiley.com/doi/abs/10.1002/eco.1688	19	LIMA2016	3	3	3	46	TR	Tropical_and_subtropical_upland_rivers	Tocatins-Araguaia	BRAZIL	12°14'49.5"S	48°21'35.7"W	-12.2471	-48.3599	TOCANTINS	PEIXE_ANGICAL	1	HYDRO	D	1	.	.	.	294	51.62	242.39	0.82	D	2.20637	767000	9.3	2006	2011	5	5	A	60.72	.	.	.	N	.	.	1
Alternative ways to measure impacts of dam closure to the structure of fish communities of a neotropical river	Ecohydrology	2016	JOURNAL	Ana Carolina Lima, Carlos Sérgio Agostinho, Amadeu M.V.M. Soares, Kieran A. Monaghan	https://onlinelibrary.wiley.com/doi/abs/10.1002/eco.1688	19	LIMA2016	3	4	1	47	TR	Tropical_and_subtropical_upland_rivers	Tocatins-Araguaia	BRAZIL	12°14'49.5"S	48°21'35.7"W	-12.2471	-48.3599	TOCANTINS	PEIXE_ANGICAL	2	HYDRO	D	1.2	.	.	.	294	51.62	242.39	0.82	D	2.20637	767000	9.3	2006	2004	-2	5	B	80.64	.	.	.	N	.	.	1
Alternative ways to measure impacts of dam closure to the structure of fish communities of a neotropical river	Ecohydrology	2016	JOURNAL	Ana Carolina Lima, Carlos Sérgio Agostinho, Amadeu M.V.M. Soares, Kieran A. Monaghan	https://onlinelibrary.wiley.com/doi/abs/10.1002/eco.1688	19	LIMA2016	3	5	2	47	TR	Tropical_and_subtropical_upland_rivers	Tocatins-Araguaia	BRAZIL	12°14'49.5"S	48°21'35.7"W	-12.2471	-48.3599	TOCANTINS	PEIXE_ANGICAL	2	HYDRO	D	1.2	.	.	.	294	51.62	242.39	0.82	D	2.20637	767000	9.3	2006	2007	1	5	A	87.74	.	.	.	N	.	.	1
Alternative ways to measure impacts of dam closure to the structure of fish communities of a neotropical river	Ecohydrology	2016	JOURNAL	Ana Carolina Lima, Carlos Sérgio Agostinho, Amadeu M.V.M. Soares, Kieran A. Monaghan	https://onlinelibrary.wiley.com/doi/abs/10.1002/eco.1688	19	LIMA2016	3	6	3	47	TR	Tropical_and_subtropical_upland_rivers	Tocatins-Araguaia	BRAZIL	12°14'49.5"S	48°21'35.7"W	-12.2471	-48.3599	TOCANTINS	PEIXE_ANGICAL	2	HYDRO	D	1.2	.	.	.	294	51.62	242.39	0.82	D	2.20637	767000	9.3	2006	2011	5	5	A	78.38	.	.	.	N	.	.	1
Alternative ways to measure impacts of dam closure to the structure of fish communities of a neotropical river	Ecohydrology	2016	JOURNAL	Ana Carolina Lima, Carlos Sérgio Agostinho, Amadeu M.V.M. Soares, Kieran A. Monaghan	https://onlinelibrary.wiley.com/doi/abs/10.1002/eco.1688	19	LIMA2016	3	7	1	48	TR	Tropical_and_subtropical_upland_rivers	Tocatins-Araguaia	BRAZIL	12°14'49.5"S	48°21'35.7"W	-12.2471	-48.3599	TOCANTINS	PEIXE_ANGICAL	3	HYDRO	UD	3.7	.	.	.	294	51.62	242.39	0.82	D	2.20637	767000	9.3	2006	2004	-2	5	B	94.2	.	.	.	N	.	.	1
Alternative ways to measure impacts of dam closure to the structure of fish communities of a neotropical river	Ecohydrology	2016	JOURNAL	Ana Carolina Lima, Carlos Sérgio Agostinho, Amadeu M.V.M. Soares, Kieran A. Monaghan	https://onlinelibrary.wiley.com/doi/abs/10.1002/eco.1688	19	LIMA2016	3	8	2	48	TR	Tropical_and_subtropical_upland_rivers	Tocatins-Araguaia	BRAZIL	12°14'49.5"S	48°21'35.7"W	-12.2471	-48.3599	TOCANTINS	PEIXE_ANGICAL	3	HYDRO	UD	3.7	.	.	.	294	51.62	242.39	0.82	D	2.20637	767000	9.3	2006	2007	1	5	A	98.188	.	.	.	N	.	.	1
Alternative ways to measure impacts of dam closure to the structure of fish communities of a neotropical river	Ecohydrology	2016	JOURNAL	Ana Carolina Lima, Carlos Sérgio Agostinho, Amadeu M.V.M. Soares, Kieran A. Monaghan	https://onlinelibrary.wiley.com/doi/abs/10.1002/eco.1688	19	LIMA2016	3	9	3	48	TR	Tropical_and_subtropical_upland_rivers	Tocatins-Araguaia	BRAZIL	12°14'49.5"S	48°21'35.7"W	-12.2471	-48.3599	TOCANTINS	PEIXE_ANGICAL	3	HYDRO	UD	3.7	.	.	.	294	51.62	242.39	0.82	D	2.20637	767000	9.3	2006	2011	5	5	A	79.71	.	.	.	N	.	.	1
Alternative ways to measure impacts of dam closure to the structure of fish communities of a neotropical river	Ecohydrology	2016	JOURNAL	Ana Carolina Lima, Carlos Sérgio Agostinho, Amadeu M.V.M. Soares, Kieran A. Monaghan	https://onlinelibrary.wiley.com/doi/abs/10.1002/eco.1688	19	LIMA2016	3	10	1	49	TR	Tropical_and_subtropical_upland_rivers	Tocatins-Araguaia	BRAZIL	12°14'49.5"S	48°21'35.7"W	-12.2471	-48.3599	TOCANTINS	PEIXE_ANGICAL	4	HYDRO	UD	16.2	.	.	.	294	51.62	242.39	0.82	D	2.20637	767000	9.3	2006	2004	-2	5	B	91.407	.	.	.	N	.	.	1
Alternative ways to measure impacts of dam closure to the structure of fish communities of a neotropical river	Ecohydrology	2016	JOURNAL	Ana Carolina Lima, Carlos Sérgio Agostinho, Amadeu M.V.M. Soares, Kieran A. Monaghan	https://onlinelibrary.wiley.com/doi/abs/10.1002/eco.1688	19	LIMA2016	3	11	2	49	TR	Tropical_and_subtropical_upland_rivers	Tocatins-Araguaia	BRAZIL	12°14'49.5"S	48°21'35.7"W	-12.2471	-48.3599	TOCANTINS	PEIXE_ANGICAL	4	HYDRO	UD	16.2	.	.	.	294	51.62	242.39	0.82	D	2.20637	767000	9.3	2006	2007	1	5	A	105.85	.	.	.	N	.	.	1
Alternative ways to measure impacts of dam closure to the structure of fish communities of a neotropical river	Ecohydrology	2016	JOURNAL	Ana Carolina Lima, Carlos Sérgio Agostinho, Amadeu M.V.M. Soares, Kieran A. Monaghan	https://onlinelibrary.wiley.com/doi/abs/10.1002/eco.1688	19	LIMA2016	3	12	3	49	TR	Tropical_and_subtropical_upland_rivers	Tocatins-Araguaia	BRAZIL	12°14'49.5"S	48°21'35.7"W	-12.2471	-48.3599	TOCANTINS	PEIXE_ANGICAL	4	HYDRO	UD	16.2	.	.	.	294	51.62	242.39	0.82	D	2.20637	767000	9.3	2006	2011	5	5	A	75.39	.	.	.	N	.	.	1
Alternative ways to measure impacts of dam closure to the structure of fish communities of a neotropical river	Ecohydrology	2016	JOURNAL	Ana Carolina Lima, Carlos Sérgio Agostinho, Amadeu M.V.M. Soares, Kieran A. Monaghan	https://onlinelibrary.wiley.com/doi/abs/10.1002/eco.1688	19	LIMA2016	3	13	1	50	TR	Tropical_and_subtropical_upland_rivers	Tocatins-Araguaia	BRAZIL	12°14'49.5"S	48°21'35.7"W	-12.2471	-48.3599	TOCANTINS	PEIXE_ANGICAL	5	HYDRO	UD	41.2	.	.	.	294	51.62	242.39	0.82	D	2.20637	767000	9.3	2006	2004	-2	5	B	99.6	.	.	.	N	.	.	1
Alternative ways to measure impacts of dam closure to the structure of fish communities of a neotropical river	Ecohydrology	2016	JOURNAL	Ana Carolina Lima, Carlos Sérgio Agostinho, Amadeu M.V.M. Soares, Kieran A. Monaghan	https://onlinelibrary.wiley.com/doi/abs/10.1002/eco.1688	19	LIMA2016	3	14	2	50	TR	Tropical_and_subtropical_upland_rivers	Tocatins-Araguaia	BRAZIL	12°14'49.5"S	48°21'35.7"W	-12.2471	-48.3599	TOCANTINS	PEIXE_ANGICAL	5	HYDRO	UD	41.2	.	.	.	294	51.62	242.39	0.82	D	2.20637	767000	9.3	2006	2007	1	5	A	105.5	.	.	.	N	.	.	1
Alternative ways to measure impacts of dam closure to the structure of fish communities of a neotropical river	Ecohydrology	2016	JOURNAL	Ana Carolina Lima, Carlos Sérgio Agostinho, Amadeu M.V.M. Soares, Kieran A. Monaghan	https://onlinelibrary.wiley.com/doi/abs/10.1002/eco.1688	19	LIMA2016	3	15	3	50	TR	Tropical_and_subtropical_upland_rivers	Tocatins-Araguaia	BRAZIL	12°14'49.5"S	48°21'35.7"W	-12.2471	-48.3599	TOCANTINS	PEIXE_ANGICAL	5	HYDRO	UD	41.2	.	.	.	294	51.62	242.39	0.82	D	2.20637	767000	9.3	2006	2011	5	5	A	89.76	.	.	.	N	.	.	1
Alternative ways to measure impacts of dam closure to the structure of fish communities of a neotropical river	Ecohydrology	2016	JOURNAL	Ana Carolina Lima, Carlos Sérgio Agostinho, Amadeu M.V.M. Soares, Kieran A. Monaghan	https://onlinelibrary.wiley.com/doi/abs/10.1002/eco.1688	19	LIMA2016	3	16	1	51	TR	Tropical_and_subtropical_upland_rivers	Tocatins-Araguaia	BRAZIL	12°14'49.5"S	48°21'35.7"W	-12.2471	-48.3599	TOCANTINS	PEIXE_ANGICAL	6	HYDRO	UD	67.8	.	.	.	294	51.62	242.39	0.82	D	2.20637	767000	9.3	2006	2004	-2	5	B	92.274	.	.	.	N	.	.	1
Alternative ways to measure impacts of dam closure to the structure of fish communities of a neotropical river	Ecohydrology	2016	JOURNAL	Ana Carolina Lima, Carlos Sérgio Agostinho, Amadeu M.V.M. Soares, Kieran A. Monaghan	https://onlinelibrary.wiley.com/doi/abs/10.1002/eco.1688	19	LIMA2016	3	17	2	51	TR	Tropical_and_subtropical_upland_rivers	Tocatins-Araguaia	BRAZIL	12°14'49.5"S	48°21'35.7"W	-12.2471	-48.3599	TOCANTINS	PEIXE_ANGICAL	6	HYDRO	UD	67.8	.	.	.	294	51.62	242.39	0.82	D	2.20637	767000	9.3	2006	2007	1	5	A	117.4	.	.	.	N	.	.	1
Alternative ways to measure impacts of dam closure to the structure of fish communities of a neotropical river	Ecohydrology	2016	JOURNAL	Ana Carolina Lima, Carlos Sérgio Agostinho, Amadeu M.V.M. Soares, Kieran A. Monaghan	https://onlinelibrary.wiley.com/doi/abs/10.1002/eco.1688	19	LIMA2016	3	18	3	51	TR	Tropical_and_subtropical_upland_rivers	Tocatins-Araguaia	BRAZIL	12°14'49.5"S	48°21'35.7"W	-12.2471	-48.3599	TOCANTINS	PEIXE_ANGICAL	6	HYDRO	UD	67.8	.	.	.	294	51.62	242.39	0.82	D	2.20637	767000	9.3	2006	2011	5	5	A	79.711	.	.	.	N	.	.	1
Alternative ways to measure impacts of dam closure to the structure of fish communities of a neotropical river	Ecohydrology	2016	JOURNAL	Ana Carolina Lima, Carlos Sérgio Agostinho, Amadeu M.V.M. Soares, Kieran A. Monaghan	https://onlinelibrary.wiley.com/doi/abs/10.1002/eco.1688	19	LIMA2016	3	19	1	52	TR	Tropical_and_subtropical_upland_rivers	Tocatins-Araguaia	BRAZIL	12°14'49.5"S	48°21'35.7"W	-12.2471	-48.3599	TOCANTINS	PEIXE_ANGICAL	7	HYDRO	UR	96.2	.	.	.	294	51.62	242.39	0.82	D	2.20637	767000	9.3	2006	2004	-2	5	B	97.472	.	.	.	N	.	.	1
Alternative ways to measure impacts of dam closure to the structure of fish communities of a neotropical river	Ecohydrology	2016	JOURNAL	Ana Carolina Lima, Carlos Sérgio Agostinho, Amadeu M.V.M. Soares, Kieran A. Monaghan	https://onlinelibrary.wiley.com/doi/abs/10.1002/eco.1688	19	LIMA2016	3	20	2	52	TR	Tropical_and_subtropical_upland_rivers	Tocatins-Araguaia	BRAZIL	12°14'49.5"S	48°21'35.7"W	-12.2471	-48.3599	TOCANTINS	PEIXE_ANGICAL	7	HYDRO	UR	96.2	.	.	.	294	51.62	242.39	0.82	D	2.20637	767000	9.3	2006	2007	1	5	A	97.112	.	.	.	N	.	.	1
Alternative ways to measure impacts of dam closure to the structure of fish communities of a neotropical river	Ecohydrology	2016	JOURNAL	Ana Carolina Lima, Carlos Sérgio Agostinho, Amadeu M.V.M. Soares, Kieran A. Monaghan	https://onlinelibrary.wiley.com/doi/abs/10.1002/eco.1688	19	LIMA2016	3	21	3	52	TR	Tropical_and_subtropical_upland_rivers	Tocatins-Araguaia	BRAZIL	12°14'49.5"S	48°21'35.7"W	-12.2471	-48.3599	TOCANTINS	PEIXE_ANGICAL	7	HYDRO	UR	96.2	.	.	.	294	51.62	242.39	0.82	D	2.20637	767000	9.3	2006	2011	5	5	A	54.872	.	.	.	N	.	.	1
Alternative ways to measure impacts of dam closure to the structure of fish communities of a neotropical river	Ecohydrology	2016	JOURNAL	Ana Carolina Lima, Carlos Sérgio Agostinho, Amadeu M.V.M. Soares, Kieran A. Monaghan	https://onlinelibrary.wiley.com/doi/abs/10.1002/eco.1688	19	LIMA2016	3	22	1	53	TR	Tropical_and_subtropical_upland_rivers	Tocatins-Araguaia	BRAZIL	12°14'49.5"S	48°21'35.7"W	-12.2471	-48.3599	TOCANTINS	PEIXE_ANGICAL	8	HYDRO	UR	97.5	.	.	.	294	51.62	242.39	0.82	D	2.20637	767000	9.3	2006	2004	-2	5	B	87.075	.	.	.	N	.	.	1
Alternative ways to measure impacts of dam closure to the structure of fish communities of a neotropical river	Ecohydrology	2016	JOURNAL	Ana Carolina Lima, Carlos Sérgio Agostinho, Amadeu M.V.M. Soares, Kieran A. Monaghan	https://onlinelibrary.wiley.com/doi/abs/10.1002/eco.1688	19	LIMA2016	3	23	2	53	TR	Tropical_and_subtropical_upland_rivers	Tocatins-Araguaia	BRAZIL	12°14'49.5"S	48°21'35.7"W	-12.2471	-48.3599	TOCANTINS	PEIXE_ANGICAL	8	HYDRO	UR	97.5	.	.	.	294	51.62	242.39	0.82	D	2.20637	767000	9.3	2006	2007	1	5	A	117.833	.	.	.	N	.	.	1
Alternative ways to measure impacts of dam closure to the structure of fish communities of a neotropical river	Ecohydrology	2016	JOURNAL	Ana Carolina Lima, Carlos Sérgio Agostinho, Amadeu M.V.M. Soares, Kieran A. Monaghan	https://onlinelibrary.wiley.com/doi/abs/10.1002/eco.1688	19	LIMA2016	3	24	3	53	TR	Tropical_and_subtropical_upland_rivers	Tocatins-Araguaia	BRAZIL	12°14'49.5"S	48°21'35.7"W	-12.2471	-48.3599	TOCANTINS	PEIXE_ANGICAL	8	HYDRO	UR	97.5	.	.	.	294	51.62	242.39	0.82	D	2.20637	767000	9.3	2006	2011	5	5	A	47.653	.	.	.	N	.	.	1
Changes in fish communities of the Shoalhaven River 20 years after construction of Tallowa Dam, Australia	River Research and Applications	2002	JOURNAL	P. C. Gehrke, D. M. Gilligan, M. Barwick	https://onlinelibrary.wiley.com/doi/abs/10.1002/rra.669	20	GEHR2002	2	1	1	54	T	Temperate_coastal_rivers	Eastern_Coastal_Australia	AUSTRALIA	34°46'20.2"S	150°18'44.1"E	-34.7723	150.312	YARRUNGA	TALLOWA	1	WATER_SUP	UR	100.3	.	.	.	9.3	0.94	8.36	0.9	C	9.60317	5750	.	1976	1972	-4	22	B	6	0	.	.	N	.	.	1
Changes in fish communities of the Shoalhaven River 20 years after construction of Tallowa Dam, Australia	River Research and Applications	2002	JOURNAL	P. C. Gehrke, D. M. Gilligan, M. Barwick	https://onlinelibrary.wiley.com/doi/abs/10.1002/rra.669	20	GEHR2002	2	2	2	54	T	Temperate_coastal_rivers	Eastern_Coastal_Australia	AUSTRALIA	34°46'20.2"S	150°18'44.1"E	-34.7723	150.312	YARRUNGA	TALLOWA	1	WATER_SUP	UR	100.3	.	.	.	9.3	0.94	8.36	0.9	C	9.60317	5750	.	1976	1998	22	22	A	8	3	.	.	Y	.	.	1
Changes in fish communities of the Shoalhaven River 20 years after construction of Tallowa Dam, Australia	River Research and Applications	2002	JOURNAL	P. C. Gehrke, D. M. Gilligan, M. Barwick	https://onlinelibrary.wiley.com/doi/abs/10.1002/rra.669	20	GEHR2002	2	3	1	55	T	Temperate_coastal_rivers	Eastern_Coastal_Australia	AUSTRALIA	34°46'20.2"S	150°18'44.1"E	-34.7723	150.312	YARRUNGA	TALLOWA	2	WATER_SUP	UR	24.7	.	.	.	9.3	0.94	8.36	0.9	C	9.60317	5750	.	1976	1972	-4	22	B	18	0	.	.	N	.	.	1
Changes in fish communities of the Shoalhaven River 20 years after construction of Tallowa Dam, Australia	River Research and Applications	2002	JOURNAL	P. C. Gehrke, D. M. Gilligan, M. Barwick	https://onlinelibrary.wiley.com/doi/abs/10.1002/rra.669	20	GEHR2002	2	4	2	55	T	Temperate_coastal_rivers	Eastern_Coastal_Australia	AUSTRALIA	34°46'20.2"S	150°18'44.1"E	-34.7723	150.312	YARRUNGA	TALLOWA	2	WATER_SUP	UR	24.7	.	.	.	9.3	0.94	8.36	0.9	C	9.60317	5750	.	1976	1998	22	22	A	7	1	.	.	Y	.	.	1
Changes in fish communities of the Shoalhaven River 20 years after construction of Tallowa Dam, Australia	River Research and Applications	2002	JOURNAL	P. C. Gehrke, D. M. Gilligan, M. Barwick	https://onlinelibrary.wiley.com/doi/abs/10.1002/rra.669	20	GEHR2002	2	5	1	56	T	Temperate_coastal_rivers	Eastern_Coastal_Australia	AUSTRALIA	34°46'20.2"S	150°18'44.1"E	-34.7723	150.312	YARRUNGA	TALLOWA	3	WATER_SUP	UR	45.7	.	.	.	9.3	0.94	8.36	0.9	C	9.60317	5750	.	1976	1972	-4	22	B	17	0	.	.	N	.	.	1
Changes in fish communities of the Shoalhaven River 20 years after construction of Tallowa Dam, Australia	River Research and Applications	2002	JOURNAL	P. C. Gehrke, D. M. Gilligan, M. Barwick	https://onlinelibrary.wiley.com/doi/abs/10.1002/rra.669	20	GEHR2002	2	6	2	56	T	Temperate_coastal_rivers	Eastern_Coastal_Australia	AUSTRALIA	34°46'20.2"S	150°18'44.1"E	-34.7723	150.312	YARRUNGA	TALLOWA	3	WATER_SUP	UR	45.7	.	.	.	9.3	0.94	8.36	0.9	C	9.60317	5750	.	1976	1998	22	22	A	8	2	.	.	Y	.	.	1
Changes in fish communities of the Shoalhaven River 20 years after construction of Tallowa Dam, Australia	River Research and Applications	2002	JOURNAL	P. C. Gehrke, D. M. Gilligan, M. Barwick	https://onlinelibrary.wiley.com/doi/abs/10.1002/rra.669	20	GEHR2002	2	7	1	57	T	Temperate_coastal_rivers	Eastern_Coastal_Australia	AUSTRALIA	34°46'20.2"S	150°18'44.1"E	-34.7723	150.312	YARRUNGA	TALLOWA	4	WATER_SUP	UR	42.1	.	.	.	9.3	0.94	8.36	0.9	C	9.60317	5750	.	1976	1972	-4	22	B	17	0	.	.	N	.	.	1
Changes in fish communities of the Shoalhaven River 20 years after construction of Tallowa Dam, Australia	River Research and Applications	2002	JOURNAL	P. C. Gehrke, D. M. Gilligan, M. Barwick	https://onlinelibrary.wiley.com/doi/abs/10.1002/rra.669	20	GEHR2002	2	8	2	57	T	Temperate_coastal_rivers	Eastern_Coastal_Australia	AUSTRALIA	34°46'20.2"S	150°18'44.1"E	-34.7723	150.312	YARRUNGA	TALLOWA	4	WATER_SUP	UR	42.1	.	.	.	9.3	0.94	8.36	0.9	C	9.60317	5750	.	1976	1998	22	22	A	3	0	.	.	Y	.	.	1
Changes in fish communities of the Shoalhaven River 20 years after construction of Tallowa Dam, Australia	River Research and Applications	2002	JOURNAL	P. C. Gehrke, D. M. Gilligan, M. Barwick	https://onlinelibrary.wiley.com/doi/abs/10.1002/rra.669	20	GEHR2002	2	9	1	58	T	Temperate_coastal_rivers	Eastern_Coastal_Australia	AUSTRALIA	34°46'20.2"S	150°18'44.1"E	-34.7723	150.312	YARRUNGA	TALLOWA	5	WATER_SUP	UR	33.3	.	.	.	9.3	0.94	8.36	0.9	C	9.60317	5750	.	1976	1972	-4	22	B	19	1	.	.	N	.	.	1
Changes in fish communities of the Shoalhaven River 20 years after construction of Tallowa Dam, Australia	River Research and Applications	2002	JOURNAL	P. C. Gehrke, D. M. Gilligan, M. Barwick	https://onlinelibrary.wiley.com/doi/abs/10.1002/rra.669	20	GEHR2002	2	10	2	58	T	Temperate_coastal_rivers	Eastern_Coastal_Australia	AUSTRALIA	34°46'20.2"S	150°18'44.1"E	-34.7723	150.312	YARRUNGA	TALLOWA	5	WATER_SUP	UR	33.3	.	.	.	9.3	0.94	8.36	0.9	C	9.60317	5750	.	1976	1998	22	22	A	8	2	.	.	Y	.	.	1
Changes in fish communities of the Shoalhaven River 20 years after construction of Tallowa Dam, Australia	River Research and Applications	2002	JOURNAL	P. C. Gehrke, D. M. Gilligan, M. Barwick	https://onlinelibrary.wiley.com/doi/abs/10.1002/rra.669	20	GEHR2002	2	11	1	59	T	Temperate_coastal_rivers	Eastern_Coastal_Australia	AUSTRALIA	34°46'20.2"S	150°18'44.1"E	-34.7723	150.312	YARRUNGA	TALLOWA	6	WATER_SUP	UD	3.9	.	.	.	9.3	0.94	8.36	0.9	C	9.60317	5750	.	1976	1972	-4	22	B	18	1	.	.	N	.	.	1
Changes in fish communities of the Shoalhaven River 20 years after construction of Tallowa Dam, Australia	River Research and Applications	2002	JOURNAL	P. C. Gehrke, D. M. Gilligan, M. Barwick	https://onlinelibrary.wiley.com/doi/abs/10.1002/rra.669	20	GEHR2002	2	12	2	59	T	Temperate_coastal_rivers	Eastern_Coastal_Australia	AUSTRALIA	34°46'20.2"S	150°18'44.1"E	-34.7723	150.312	YARRUNGA	TALLOWA	6	WATER_SUP	UD	3.9	.	.	.	9.3	0.94	8.36	0.9	C	9.60317	5750	.	1976	1998	22	22	A	9	3	.	.	Y	.	.	1
Changes in fish communities of the Shoalhaven River 20 years after construction of Tallowa Dam, Australia	River Research and Applications	2002	JOURNAL	P. C. Gehrke, D. M. Gilligan, M. Barwick	https://onlinelibrary.wiley.com/doi/abs/10.1002/rra.669	20	GEHR2002	2	13	1	60	T	Temperate_coastal_rivers	Eastern_Coastal_Australia	AUSTRALIA	34°46'20.2"S	150°18'44.1"E	-34.7723	150.312	YARRUNGA	TALLOWA	7	WATER_SUP	UD	2.8	.	.	.	9.3	0.94	8.36	0.9	C	9.60317	5750	.	1976	1972	-4	22	B	18	1	.	.	N	.	.	1
Changes in fish communities of the Shoalhaven River 20 years after construction of Tallowa Dam, Australia	River Research and Applications	2002	JOURNAL	P. C. Gehrke, D. M. Gilligan, M. Barwick	https://onlinelibrary.wiley.com/doi/abs/10.1002/rra.669	20	GEHR2002	2	14	2	60	T	Temperate_coastal_rivers	Eastern_Coastal_Australia	AUSTRALIA	34°46'20.2"S	150°18'44.1"E	-34.7723	150.312	YARRUNGA	TALLOWA	7	WATER_SUP	UD	2.8	.	.	.	9.3	0.94	8.36	0.9	C	9.60317	5750	.	1976	1998	22	22	A	12	4	.	.	Y	.	.	1
Changes in fish communities of the Shoalhaven River 20 years after construction of Tallowa Dam, Australia	River Research and Applications	2002	JOURNAL	P. C. Gehrke, D. M. Gilligan, M. Barwick	https://onlinelibrary.wiley.com/doi/abs/10.1002/rra.669	20	GEHR2002	2	15	1	61	T	Temperate_coastal_rivers	Eastern_Coastal_Australia	AUSTRALIA	34°46'20.2"S	150°18'44.1"E	-34.7723	150.312	YARRUNGA	TALLOWA	11	WATER_SUP	UD	7.5	.	.	.	9.3	0.94	8.36	0.9	C	9.60317	5750	.	1976	1972	-4	22	B	18	1	.	.	N	.	.	1
Changes in fish communities of the Shoalhaven River 20 years after construction of Tallowa Dam, Australia	River Research and Applications	2002	JOURNAL	P. C. Gehrke, D. M. Gilligan, M. Barwick	https://onlinelibrary.wiley.com/doi/abs/10.1002/rra.669	20	GEHR2002	2	16	2	61	T	Temperate_coastal_rivers	Eastern_Coastal_Australia	AUSTRALIA	34°46'20.2"S	150°18'44.1"E	-34.7723	150.312	YARRUNGA	TALLOWA	11	WATER_SUP	UD	7.5	.	.	.	9.3	0.94	8.36	0.9	C	9.60317	5750	.	1976	1998	22	22	A	9	3	.	.	Y	.	.	1
Changes in fish communities of the Shoalhaven River 20 years after construction of Tallowa Dam, Australia	River Research and Applications	2002	JOURNAL	P. C. Gehrke, D. M. Gilligan, M. Barwick	https://onlinelibrary.wiley.com/doi/abs/10.1002/rra.669	20	GEHR2002	2	17	1	62	T	Temperate_coastal_rivers	Eastern_Coastal_Australia	AUSTRALIA	34°46'20.2"S	150°18'44.1"E	-34.7723	150.312	YARRUNGA	TALLOWA	12	WATER_SUP	UD	9.3	.	.	.	9.3	0.94	8.36	0.9	C	9.60317	5750	.	1976	1972	-4	22	B	18	1	.	.	N	.	.	1
Changes in fish communities of the Shoalhaven River 20 years after construction of Tallowa Dam, Australia	River Research and Applications	2002	JOURNAL	P. C. Gehrke, D. M. Gilligan, M. Barwick	https://onlinelibrary.wiley.com/doi/abs/10.1002/rra.669	20	GEHR2002	2	18	2	62	T	Temperate_coastal_rivers	Eastern_Coastal_Australia	AUSTRALIA	34°46'20.2"S	150°18'44.1"E	-34.7723	150.312	YARRUNGA	TALLOWA	12	WATER_SUP	UD	9.3	.	.	.	9.3	0.94	8.36	0.9	C	9.60317	5750	.	1976	1998	22	22	A	9	3	.	.	Y	.	.	1
Changes in fish communities of the Shoalhaven River 20 years after construction of Tallowa Dam, Australia	River Research and Applications	2002	JOURNAL	P. C. Gehrke, D. M. Gilligan, M. Barwick	https://onlinelibrary.wiley.com/doi/abs/10.1002/rra.669	20	GEHR2002	2	19	1	63	T	Temperate_coastal_rivers	Eastern_Coastal_Australia	AUSTRALIA	34°46'20.2"S	150°18'44.1"E	-34.7723	150.312	YARRUNGA	TALLOWA	8	WATER_SUP	D	0.1	.	.	.	9.3	0.94	8.36	0.9	C	9.60317	5750	.	1976	1972	-4	22	B	18	1	.	.	N	.	.	1
Changes in fish communities of the Shoalhaven River 20 years after construction of Tallowa Dam, Australia	River Research and Applications	2002	JOURNAL	P. C. Gehrke, D. M. Gilligan, M. Barwick	https://onlinelibrary.wiley.com/doi/abs/10.1002/rra.669	20	GEHR2002	2	20	2	63	T	Temperate_coastal_rivers	Eastern_Coastal_Australia	AUSTRALIA	34°46'20.2"S	150°18'44.1"E	-34.7723	150.312	YARRUNGA	TALLOWA	8	WATER_SUP	D	0.1	.	.	.	9.3	0.94	8.36	0.9	C	9.60317	5750	.	1976	1998	22	22	A	17	4	.	.	Y	.	.	1
Changes in fish communities of the Shoalhaven River 20 years after construction of Tallowa Dam, Australia	River Research and Applications	2002	JOURNAL	P. C. Gehrke, D. M. Gilligan, M. Barwick	https://onlinelibrary.wiley.com/doi/abs/10.1002/rra.669	20	GEHR2002	2	21	1	64	T	Temperate_coastal_rivers	Eastern_Coastal_Australia	AUSTRALIA	34°46'20.2"S	150°18'44.1"E	-34.7723	150.312	YARRUNGA	TALLOWA	9	WATER_SUP	D	0.5	.	.	.	9.3	0.94	8.36	0.9	C	9.60317	5750	.	1976	1972	-4	22	B	18	1	.	.	N	.	.	1
Changes in fish communities of the Shoalhaven River 20 years after construction of Tallowa Dam, Australia	River Research and Applications	2002	JOURNAL	P. C. Gehrke, D. M. Gilligan, M. Barwick	https://onlinelibrary.wiley.com/doi/abs/10.1002/rra.669	20	GEHR2002	2	22	2	64	T	Temperate_coastal_rivers	Eastern_Coastal_Australia	AUSTRALIA	34°46'20.2"S	150°18'44.1"E	-34.7723	150.312	YARRUNGA	TALLOWA	9	WATER_SUP	D	0.5	.	.	.	9.3	0.94	8.36	0.9	C	9.60317	5750	.	1976	1998	22	22	A	16	2	.	.	Y	.	.	1
Changes in fish communities of the Shoalhaven River 20 years after construction of Tallowa Dam, Australia	River Research and Applications	2002	JOURNAL	P. C. Gehrke, D. M. Gilligan, M. Barwick	https://onlinelibrary.wiley.com/doi/abs/10.1002/rra.669	20	GEHR2002	2	23	1	65	T	Temperate_coastal_rivers	Eastern_Coastal_Australia	AUSTRALIA	34°46'20.2"S	150°18'44.1"E	-34.7723	150.312	YARRUNGA	TALLOWA	10	WATER_SUP	D	28.3	.	.	.	9.3	0.94	8.36	0.9	C	9.60317	5750	.	1976	1972	-4	22	B	20	1	.	.	N	.	.	1
Changes in fish communities of the Shoalhaven River 20 years after construction of Tallowa Dam, Australia	River Research and Applications	2002	JOURNAL	P. C. Gehrke, D. M. Gilligan, M. Barwick	https://onlinelibrary.wiley.com/doi/abs/10.1002/rra.669	20	GEHR2002	2	24	2	65	T	Temperate_coastal_rivers	Eastern_Coastal_Australia	AUSTRALIA	34°46'20.2"S	150°18'44.1"E	-34.7723	150.312	YARRUNGA	TALLOWA	10	WATER_SUP	D	28.3	.	.	.	9.3	0.94	8.36	0.9	C	9.60317	5750	.	1976	1998	22	22	A	20	3	.	.	Y	.	.	1
Fish species composition before and after construction of a reservoir on the Guadalete River (SW Spain)	Archiv für Hydrobiologie	1998	JOURNAL	A. Rodriguez Ruiz	https://www.schweizerbart.de/papers/archiv_hydrobiologie/detail/142/86242/Fish_species_composition_before_and_after_construction_of_a_reservoir_on_the_Guadalete_River_SW_Spain	21	RODR1998	13	1	1	66	T	Temperate_floodplain_rivers_and_wetlands	Southern_Iberia	SPAIN	36°50'13.3"N	5°22'07.9"W	36.837	-5.36886	ZAHARA-EL_GASTOR	ZAHARA-EL_GASTOR	S1	IRRIGATION	UR	16.19	5	.	.	5.3	0.67	4.63	0.87	L	3.64468	3677	28	1991	1987	-4	5	B	3	0	1.032	0.939	Y	2.809	0.675	1
Fish species composition before and after construction of a reservoir on the Guadalete River (SW Spain)	Archiv für Hydrobiologie	1998	JOURNAL	A. Rodriguez Ruiz	https://www.schweizerbart.de/papers/archiv_hydrobiologie/detail/142/86242/Fish_species_composition_before_and_after_construction_of_a_reservoir_on_the_Guadalete_River_SW_Spain	21	RODR1998	13	2	2	66	T	Temperate_floodplain_rivers_and_wetlands	Southern_Iberia	SPAIN	36°50'13.3"N	5°22'07.9"W	36.837	-5.36886	ZAHARA-EL_GASTOR	ZAHARA-EL_GASTOR	S1	IRRIGATION	UR	16.19	5	.	.	5.3	0.67	4.63	0.87	L	3.64468	3677	28	1991	1988	-3	5	B	3	0	1.082	0.985	Y	2.784	0.697	1
Fish species composition before and after construction of a reservoir on the Guadalete River (SW Spain)	Archiv für Hydrobiologie	1998	JOURNAL	A. Rodriguez Ruiz	https://www.schweizerbart.de/papers/archiv_hydrobiologie/detail/142/86242/Fish_species_composition_before_and_after_construction_of_a_reservoir_on_the_Guadalete_River_SW_Spain	21	RODR1998	13	3	3	66	T	Temperate_floodplain_rivers_and_wetlands	Southern_Iberia	SPAIN	36°50'13.3"N	5°22'07.9"W	36.837	-5.36886	ZAHARA-EL_GASTOR	ZAHARA-EL_GASTOR	S1	IRRIGATION	UR	16.19	5	.	.	5.3	0.67	4.63	0.87	L	3.64468	3677	28	1991	1989	-2	5	B	3	0	1.068	0.972	Y	2.888	0.548	1
Fish species composition before and after construction of a reservoir on the Guadalete River (SW Spain)	Archiv für Hydrobiologie	1998	JOURNAL	A. Rodriguez Ruiz	https://www.schweizerbart.de/papers/archiv_hydrobiologie/detail/142/86242/Fish_species_composition_before_and_after_construction_of_a_reservoir_on_the_Guadalete_River_SW_Spain	21	RODR1998	13	4	4	66	T	Temperate_floodplain_rivers_and_wetlands	Southern_Iberia	SPAIN	36°50'13.3"N	5°22'07.9"W	36.837	-5.36886	ZAHARA-EL_GASTOR	ZAHARA-EL_GASTOR	S1	IRRIGATION	UR	16.19	5	.	.	5.3	0.67	4.63	0.87	L	3.64468	3677	28	1991	1990	-1	5	B	3	0	0.898	0.817	Y	2.99	0.4	1
Fish species composition before and after construction of a reservoir on the Guadalete River (SW Spain)	Archiv für Hydrobiologie	1998	JOURNAL	A. Rodriguez Ruiz	https://www.schweizerbart.de/papers/archiv_hydrobiologie/detail/142/86242/Fish_species_composition_before_and_after_construction_of_a_reservoir_on_the_Guadalete_River_SW_Spain	21	RODR1998	13	5	5	66	T	Temperate_floodplain_rivers_and_wetlands	Southern_Iberia	SPAIN	36°50'13.3"N	5°22'07.9"W	36.837	-5.36886	ZAHARA-EL_GASTOR	ZAHARA-EL_GASTOR	S1	IRRIGATION	UR	16.19	5	.	.	5.3	0.67	4.63	0.87	L	3.64468	3677	28	1991	1991	0	5	F	3	0	0.769	0.7	Y	3.085	0.28	1
Fish species composition before and after construction of a reservoir on the Guadalete River (SW Spain)	Archiv für Hydrobiologie	1998	JOURNAL	A. Rodriguez Ruiz	https://www.schweizerbart.de/papers/archiv_hydrobiologie/detail/142/86242/Fish_species_composition_before_and_after_construction_of_a_reservoir_on_the_Guadalete_River_SW_Spain	21	RODR1998	13	6	6	66	T	Temperate_floodplain_rivers_and_wetlands	Southern_Iberia	SPAIN	36°50'13.3"N	5°22'07.9"W	36.837	-5.36886	ZAHARA-EL_GASTOR	ZAHARA-EL_GASTOR	S1	IRRIGATION	UR	16.19	5	.	.	5.3	0.67	4.63	0.87	L	3.64468	3677	28	1991	1994	3	5	A	3	0	0.73	0.664	Y	3.115	0.251	1
Fish species composition before and after construction of a reservoir on the Guadalete River (SW Spain)	Archiv für Hydrobiologie	1998	JOURNAL	A. Rodriguez Ruiz	https://www.schweizerbart.de/papers/archiv_hydrobiologie/detail/142/86242/Fish_species_composition_before_and_after_construction_of_a_reservoir_on_the_Guadalete_River_SW_Spain	21	RODR1998	13	7	7	66	T	Temperate_floodplain_rivers_and_wetlands	Southern_Iberia	SPAIN	36°50'13.3"N	5°22'07.9"W	36.837	-5.36886	ZAHARA-EL_GASTOR	ZAHARA-EL_GASTOR	S1	IRRIGATION	UR	16.19	5	.	.	5.3	0.67	4.63	0.87	L	3.64468	3677	28	1991	1995	4	5	A	3	0	0.602	0.548	Y	3.145	0.199	1
Fish species composition before and after construction of a reservoir on the Guadalete River (SW Spain)	Archiv für Hydrobiologie	1998	JOURNAL	A. Rodriguez Ruiz	https://www.schweizerbart.de/papers/archiv_hydrobiologie/detail/142/86242/Fish_species_composition_before_and_after_construction_of_a_reservoir_on_the_Guadalete_River_SW_Spain	21	RODR1998	13	8	8	66	T	Temperate_floodplain_rivers_and_wetlands	Southern_Iberia	SPAIN	36°50'13.3"N	5°22'07.9"W	36.837	-5.36886	ZAHARA-EL_GASTOR	ZAHARA-EL_GASTOR	S1	IRRIGATION	UR	16.19	5	.	.	5.3	0.67	4.63	0.87	L	3.64468	3677	28	1991	1996	5	5	A	3	0	0.732	0.666	Y	2.655	0.9	1
Fish species composition before and after construction of a reservoir on the Guadalete River (SW Spain)	Archiv für Hydrobiologie	1998	JOURNAL	A. Rodriguez Ruiz	https://www.schweizerbart.de/papers/archiv_hydrobiologie/detail/142/86242/Fish_species_composition_before_and_after_construction_of_a_reservoir_on_the_Guadalete_River_SW_Spain	21	RODR1998	13	9	9	66	T	Temperate_floodplain_rivers_and_wetlands	Southern_Iberia	SPAIN	36°50'13.3"N	5°22'07.9"W	36.837	-5.36886	ZAHARA-EL_GASTOR	ZAHARA-EL_GASTOR	S2	IRRIGATION	UR	16.19	5	.	.	5.3	0.67	4.63	0.87	L	3.64468	3677	28	1991	1988	-3	5	B	3	0	0.87	0.792	Y	2.623	0.921	1
Fish species composition before and after construction of a reservoir on the Guadalete River (SW Spain)	Archiv für Hydrobiologie	1998	JOURNAL	A. Rodriguez Ruiz	https://www.schweizerbart.de/papers/archiv_hydrobiologie/detail/142/86242/Fish_species_composition_before_and_after_construction_of_a_reservoir_on_the_Guadalete_River_SW_Spain	21	RODR1998	13	10	10	66	T	Temperate_floodplain_rivers_and_wetlands	Southern_Iberia	SPAIN	36°50'13.3"N	5°22'07.9"W	36.837	-5.36886	ZAHARA-EL_GASTOR	ZAHARA-EL_GASTOR	S2	IRRIGATION	UR	16.19	5	.	.	5.3	0.67	4.63	0.87	L	3.64468	3677	28	1991	1989	-2	5	B	3	0	0.686	0.624	Y	2.606	0.96	1
Fish species composition before and after construction of a reservoir on the Guadalete River (SW Spain)	Archiv für Hydrobiologie	1998	JOURNAL	A. Rodriguez Ruiz	https://www.schweizerbart.de/papers/archiv_hydrobiologie/detail/142/86242/Fish_species_composition_before_and_after_construction_of_a_reservoir_on_the_Guadalete_River_SW_Spain	21	RODR1998	13	11	11	66	T	Temperate_floodplain_rivers_and_wetlands	Southern_Iberia	SPAIN	36°50'13.3"N	5°22'07.9"W	36.837	-5.36886	ZAHARA-EL_GASTOR	ZAHARA-EL_GASTOR	S2	IRRIGATION	UR	16.19	5	.	.	5.3	0.67	4.63	0.87	L	3.64468	3677	28	1991	1992	1	5	A	3	0	0.873	0.795	Y	2.831	0.659	1
Fish species composition before and after construction of a reservoir on the Guadalete River (SW Spain)	Archiv für Hydrobiologie	1998	JOURNAL	A. Rodriguez Ruiz	https://www.schweizerbart.de/papers/archiv_hydrobiologie/detail/142/86242/Fish_species_composition_before_and_after_construction_of_a_reservoir_on_the_Guadalete_River_SW_Spain	21	RODR1998	13	12	12	66	T	Temperate_floodplain_rivers_and_wetlands	Southern_Iberia	SPAIN	36°50'13.3"N	5°22'07.9"W	36.837	-5.36886	ZAHARA-EL_GASTOR	ZAHARA-EL_GASTOR	S2	IRRIGATION	UR	16.19	5	.	.	5.3	0.67	4.63	0.87	L	3.64468	3677	28	1991	1993	2	5	A	3	0	0.853	0.776	Y	2.673	0.867	1
Fish species composition before and after construction of a reservoir on the Guadalete River (SW Spain)	Archiv für Hydrobiologie	1998	JOURNAL	A. Rodriguez Ruiz	https://www.schweizerbart.de/papers/archiv_hydrobiologie/detail/142/86242/Fish_species_composition_before_and_after_construction_of_a_reservoir_on_the_Guadalete_River_SW_Spain	21	RODR1998	13	13	13	66	T	Temperate_floodplain_rivers_and_wetlands	Southern_Iberia	SPAIN	36°50'13.3"N	5°22'07.9"W	36.837	-5.36886	ZAHARA-EL_GASTOR	ZAHARA-EL_GASTOR	S2	IRRIGATION	UR	16.19	5	.	.	5.3	0.67	4.63	0.87	L	3.64468	3677	28	1991	1996	5	5	A	4	1	0.22	0.159	Y	3.754	0.99	1
Fish species composition before and after construction of a reservoir on the Guadalete River (SW Spain)	Archiv für Hydrobiologie	1998	JOURNAL	A. Rodriguez Ruiz	https://www.schweizerbart.de/papers/archiv_hydrobiologie/detail/142/86242/Fish_species_composition_before_and_after_construction_of_a_reservoir_on_the_Guadalete_River_SW_Spain	21	RODR1998	8	14	1	67	T	Temperate_floodplain_rivers_and_wetlands	Southern_Iberia	SPAIN	36°50'13.3"N	5°22'07.9"W	36.837	-5.36886	ZAHARA-EL_GASTOR	ZAHARA-EL_GASTOR	S3	IRRIGATION	D	8.07	5	.	.	5.3	0.67	4.63	0.87	L	3.64468	3677	28	1991	1987	-4	5	B	3	0	0.92	0.838	Y	2.669	0.865	1
Fish species composition before and after construction of a reservoir on the Guadalete River (SW Spain)	Archiv für Hydrobiologie	1998	JOURNAL	A. Rodriguez Ruiz	https://www.schweizerbart.de/papers/archiv_hydrobiologie/detail/142/86242/Fish_species_composition_before_and_after_construction_of_a_reservoir_on_the_Guadalete_River_SW_Spain	21	RODR1998	8	15	2	67	T	Temperate_floodplain_rivers_and_wetlands	Southern_Iberia	SPAIN	36°50'13.3"N	5°22'07.9"W	36.837	-5.36886	ZAHARA-EL_GASTOR	ZAHARA-EL_GASTOR	S3	IRRIGATION	D	8.07	5	.	.	5.3	0.67	4.63	0.87	L	3.64468	3677	28	1991	1988	-3	5	B	3	0	0.754	0.686	Y	2.596	0.963	1
Fish species composition before and after construction of a reservoir on the Guadalete River (SW Spain)	Archiv für Hydrobiologie	1998	JOURNAL	A. Rodriguez Ruiz	https://www.schweizerbart.de/papers/archiv_hydrobiologie/detail/142/86242/Fish_species_composition_before_and_after_construction_of_a_reservoir_on_the_Guadalete_River_SW_Spain	21	RODR1998	8	16	3	67	T	Temperate_floodplain_rivers_and_wetlands	Southern_Iberia	SPAIN	36°50'13.3"N	5°22'07.9"W	36.837	-5.36886	ZAHARA-EL_GASTOR	ZAHARA-EL_GASTOR	S3	IRRIGATION	D	8.07	5	.	.	5.3	0.67	4.63	0.87	L	3.64468	3677	28	1991	1989	-2	5	B	3	0	0.76	0.692	Y	2.606	0.953	1
Fish species composition before and after construction of a reservoir on the Guadalete River (SW Spain)	Archiv für Hydrobiologie	1998	JOURNAL	A. Rodriguez Ruiz	https://www.schweizerbart.de/papers/archiv_hydrobiologie/detail/142/86242/Fish_species_composition_before_and_after_construction_of_a_reservoir_on_the_Guadalete_River_SW_Spain	21	RODR1998	8	17	4	67	T	Temperate_floodplain_rivers_and_wetlands	Southern_Iberia	SPAIN	36°50'13.3"N	5°22'07.9"W	36.837	-5.36886	ZAHARA-EL_GASTOR	ZAHARA-EL_GASTOR	S3	IRRIGATION	D	8.07	5	.	.	5.3	0.67	4.63	0.87	L	3.64468	3677	28	1991	1990	-1	5	B	3	0	0.898	0.817	Y	2.61	0.9	1
Fish species composition before and after construction of a reservoir on the Guadalete River (SW Spain)	Archiv für Hydrobiologie	1998	JOURNAL	A. Rodriguez Ruiz	https://www.schweizerbart.de/papers/archiv_hydrobiologie/detail/142/86242/Fish_species_composition_before_and_after_construction_of_a_reservoir_on_the_Guadalete_River_SW_Spain	21	RODR1998	8	18	5	67	T	Temperate_floodplain_rivers_and_wetlands	Southern_Iberia	SPAIN	36°50'13.3"N	5°22'07.9"W	36.837	-5.36886	ZAHARA-EL_GASTOR	ZAHARA-EL_GASTOR	S3	IRRIGATION	D	8.07	5	.	.	5.3	0.67	4.63	0.87	L	3.64468	3677	28	1991	1991	0	5	A	3	0	0.77	0.701	Y	2.559	0.98	1
Fish species composition before and after construction of a reservoir on the Guadalete River (SW Spain)	Archiv für Hydrobiologie	1998	JOURNAL	A. Rodriguez Ruiz	https://www.schweizerbart.de/papers/archiv_hydrobiologie/detail/142/86242/Fish_species_composition_before_and_after_construction_of_a_reservoir_on_the_Guadalete_River_SW_Spain	21	RODR1998	8	19	6	67	T	Temperate_floodplain_rivers_and_wetlands	Southern_Iberia	SPAIN	36°50'13.3"N	5°22'07.9"W	36.837	-5.36886	ZAHARA-EL_GASTOR	ZAHARA-EL_GASTOR	S3	IRRIGATION	D	8.07	5	.	.	5.3	0.67	4.63	0.87	L	3.64468	3677	28	1991	1994	3	5	A	3	0	0.978	0.89	Y	2.641	0.87	1
Fish species composition before and after construction of a reservoir on the Guadalete River (SW Spain)	Archiv für Hydrobiologie	1998	JOURNAL	A. Rodriguez Ruiz	https://www.schweizerbart.de/papers/archiv_hydrobiologie/detail/142/86242/Fish_species_composition_before_and_after_construction_of_a_reservoir_on_the_Guadalete_River_SW_Spain	21	RODR1998	8	20	7	67	T	Temperate_floodplain_rivers_and_wetlands	Southern_Iberia	SPAIN	36°50'13.3"N	5°22'07.9"W	36.837	-5.36886	ZAHARA-EL_GASTOR	ZAHARA-EL_GASTOR	S3	IRRIGATION	D	8.07	5	.	.	5.3	0.67	4.63	0.87	L	3.64468	3677	28	1991	1995	4	5	A	3	0	0.395	0.359	Y	2.561	0.928	1
Fish species composition before and after construction of a reservoir on the Guadalete River (SW Spain)	Archiv für Hydrobiologie	1998	JOURNAL	A. Rodriguez Ruiz	https://www.schweizerbart.de/papers/archiv_hydrobiologie/detail/142/86242/Fish_species_composition_before_and_after_construction_of_a_reservoir_on_the_Guadalete_River_SW_Spain	21	RODR1998	8	21	8	67	T	Temperate_floodplain_rivers_and_wetlands	Southern_Iberia	SPAIN	36°50'13.3"N	5°22'07.9"W	36.837	-5.36886	ZAHARA-EL_GASTOR	ZAHARA-EL_GASTOR	S3	IRRIGATION	D	8.07	5	.	.	5.3	0.67	4.63	0.87	L	3.64468	3677	28	1991	1996	5	5	A	3	0	1.038	0.945	Y	2.698	0.791	1
Fish species composition before and after construction of a reservoir on the Guadalete River (SW Spain)	Archiv für Hydrobiologie	1998	JOURNAL	A. Rodriguez Ruiz	https://www.schweizerbart.de/papers/archiv_hydrobiologie/detail/142/86242/Fish_species_composition_before_and_after_construction_of_a_reservoir_on_the_Guadalete_River_SW_Spain	21	RODR1998	7	22	1	68	T	Temperate_floodplain_rivers_and_wetlands	Southern_Iberia	SPAIN	36°50'13.3"N	5°22'07.9"W	36.837	-5.36886	ZAHARA-EL_GASTOR	ZAHARA-EL_GASTOR	R	IRRIGATION	UD	6.24	5	.	.	5.3	0.67	4.63	0.87	L	3.64468	3677	28	1991	1987	-4	5	B	3	0	0.759	0.69	Y	2.827	0.672	1
Fish species composition before and after construction of a reservoir on the Guadalete River (SW Spain)	Archiv für Hydrobiologie	1998	JOURNAL	A. Rodriguez Ruiz	https://www.schweizerbart.de/papers/archiv_hydrobiologie/detail/142/86242/Fish_species_composition_before_and_after_construction_of_a_reservoir_on_the_Guadalete_River_SW_Spain	21	RODR1998	7	23	2	68	T	Temperate_floodplain_rivers_and_wetlands	Southern_Iberia	SPAIN	36°50'13.3"N	5°22'07.9"W	36.837	-5.36886	ZAHARA-EL_GASTOR	ZAHARA-EL_GASTOR	R	IRRIGATION	UD	6.24	5	.	.	5.3	0.67	4.63	0.87	L	3.64468	3677	28	1991	1988	-3	5	B	3	0	0.726	0.661	Y	2.698	0.847	1
Fish species composition before and after construction of a reservoir on the Guadalete River (SW Spain)	Archiv für Hydrobiologie	1998	JOURNAL	A. Rodriguez Ruiz	https://www.schweizerbart.de/papers/archiv_hydrobiologie/detail/142/86242/Fish_species_composition_before_and_after_construction_of_a_reservoir_on_the_Guadalete_River_SW_Spain	21	RODR1998	7	24	3	68	T	Temperate_floodplain_rivers_and_wetlands	Southern_Iberia	SPAIN	36°50'13.3"N	5°22'07.9"W	36.837	-5.36886	ZAHARA-EL_GASTOR	ZAHARA-EL_GASTOR	R	IRRIGATION	UD	6.24	5	.	.	5.3	0.67	4.63	0.87	L	3.64468	3677	28	1991	1992	1	5	A	3	0	0.207	0.189	Y	2.534	0.958	1
Fish species composition before and after construction of a reservoir on the Guadalete River (SW Spain)	Archiv für Hydrobiologie	1998	JOURNAL	A. Rodriguez Ruiz	https://www.schweizerbart.de/papers/archiv_hydrobiologie/detail/142/86242/Fish_species_composition_before_and_after_construction_of_a_reservoir_on_the_Guadalete_River_SW_Spain	21	RODR1998	7	25	4	68	T	Temperate_floodplain_rivers_and_wetlands	Southern_Iberia	SPAIN	36°50'13.3"N	5°22'07.9"W	36.837	-5.36886	ZAHARA-EL_GASTOR	ZAHARA-EL_GASTOR	R	IRRIGATION	UD	6.24	5	.	.	5.3	0.67	4.63	0.87	L	3.64468	3677	28	1991	1993	2	5	A	4	1	0.29	0.209	Y	2.548	0.946	1
Fish species composition before and after construction of a reservoir on the Guadalete River (SW Spain)	Archiv für Hydrobiologie	1998	JOURNAL	A. Rodriguez Ruiz	https://www.schweizerbart.de/papers/archiv_hydrobiologie/detail/142/86242/Fish_species_composition_before_and_after_construction_of_a_reservoir_on_the_Guadalete_River_SW_Spain	21	RODR1998	7	26	5	68	T	Temperate_floodplain_rivers_and_wetlands	Southern_Iberia	SPAIN	36°50'13.3"N	5°22'07.9"W	36.837	-5.36886	ZAHARA-EL_GASTOR	ZAHARA-EL_GASTOR	R	IRRIGATION	UD	6.24	5	.	.	5.3	0.67	4.63	0.87	L	3.64468	3677	28	1991	1994	3	5	A	5	2	0.282	0.203	Y	2.539	0.957	1
Fish species composition before and after construction of a reservoir on the Guadalete River (SW Spain)	Archiv für Hydrobiologie	1998	JOURNAL	A. Rodriguez Ruiz	https://www.schweizerbart.de/papers/archiv_hydrobiologie/detail/142/86242/Fish_species_composition_before_and_after_construction_of_a_reservoir_on_the_Guadalete_River_SW_Spain	21	RODR1998	7	27	6	68	T	Temperate_floodplain_rivers_and_wetlands	Southern_Iberia	SPAIN	36°50'13.3"N	5°22'07.9"W	36.837	-5.36886	ZAHARA-EL_GASTOR	ZAHARA-EL_GASTOR	R	IRRIGATION	UD	6.24	5	.	.	5.3	0.67	4.63	0.87	L	3.64468	3677	28	1991	1995	4	5	A	5	2	0.442	0.274	Y	2.528	0.98	1
Fish species composition before and after construction of a reservoir on the Guadalete River (SW Spain)	Archiv für Hydrobiologie	1998	JOURNAL	A. Rodriguez Ruiz	https://www.schweizerbart.de/papers/archiv_hydrobiologie/detail/142/86242/Fish_species_composition_before_and_after_construction_of_a_reservoir_on_the_Guadalete_River_SW_Spain	21	RODR1998	7	28	7	68	T	Temperate_floodplain_rivers_and_wetlands	Southern_Iberia	SPAIN	36°50'13.3"N	5°22'07.9"W	36.837	-5.36886	ZAHARA-EL_GASTOR	ZAHARA-EL_GASTOR	R	IRRIGATION	UD	6.24	5	.	.	5.3	0.67	4.63	0.87	L	3.64468	3677	28	1991	1996	5	5	A	5	2	1.151	0.83	Y	2.736	1	1
Fishers' knowledge identifies environmental changes and fish abundance trends in impounded tropical rivers	Ecological Applications	2013	JOURNAL	Gustavo Hallwass, Priscila F. Lopes, Anastácio A. Juras, Renato A. M. Silvano	https://esajournals.onlinelibrary.wiley.com/doi/abs/10.1890/12-0429.1	22	HALL2013	2	1	1	69	TR	Tropical_and_subtropical_upland_rivers	Tocatins-Araguaia	BRAZIL	3°52'38.2"S	49°38'22.3"W	-3.87728	-49.6395	TUCURUI	TUCURUI	1	HYDRO	D	.	.	.	.	2349.1	310.19	2038.91	0.87	D	2.56492	762670	21.1	1984	1981	-3	23	B	32	.	.	.	Y*	.	.	1
Fishers' knowledge identifies environmental changes and fish abundance trends in impounded tropical rivers	Ecological Applications	2013	JOURNAL	Gustavo Hallwass, Priscila F. Lopes, Anastácio A. Juras, Renato A. M. Silvano	https://esajournals.onlinelibrary.wiley.com/doi/abs/10.1890/12-0429.1	22	HALL2013	2	2	2	69	TR	Tropical_and_subtropical_upland_rivers	Tocatins-Araguaia	BRAZIL	3°52'38.2"S	49°38'22.3"W	-3.87728	-49.6395	TUCURUI	TUCURUI	1	HYDRO	D	.	.	.	.	2349.1	310.19	2038.91	0.87	D	2.56492	762670	21.1	1984	2007	23	23	A	27	.	.	.	Y*	.	.	1
Fishers' knowledge identifies environmental changes and fish abundance trends in impounded tropical rivers	Ecological Applications	2013	JOURNAL	Gustavo Hallwass, Priscila F. Lopes, Anastácio A. Juras, Renato A. M. Silvano	https://esajournals.onlinelibrary.wiley.com/doi/abs/10.1890/12-0429.1	22	HALL2013	2	3	1	70	TR	Tropical_and_subtropical_upland_rivers	Tocatins-Araguaia	BRAZIL	3°52'38.2"S	49°38'22.3"W	-3.87728	-49.6395	TUCURUI	TUCURUI	2	HYDRO	D	90.9	.	.	.	2349.1	310.19	2038.91	0.87	D	2.56492	762670	21.1	1984	1981	-3	23	B	36	.	.	.	Y*	.	.	1
Fishers' knowledge identifies environmental changes and fish abundance trends in impounded tropical rivers	Ecological Applications	2013	JOURNAL	Gustavo Hallwass, Priscila F. Lopes, Anastácio A. Juras, Renato A. M. Silvano	https://esajournals.onlinelibrary.wiley.com/doi/abs/10.1890/12-0429.1	22	HALL2013	2	4	2	70	TR	Tropical_and_subtropical_upland_rivers	Tocatins-Araguaia	BRAZIL	3°52'38.2"S	49°38'22.3"W	-3.87728	-49.6395	TUCURUI	TUCURUI	2	HYDRO	D	90.9	.	.	.	2349.1	310.19	2038.91	0.87	D	2.56492	762670	21.1	1984	2007	23	23	A	29	.	.	.	Y*	.	.	1
Fishers' knowledge identifies environmental changes and fish abundance trends in impounded tropical rivers	Ecological Applications	2013	JOURNAL	Gustavo Hallwass, Priscila F. Lopes, Anastácio A. Juras, Renato A. M. Silvano	https://esajournals.onlinelibrary.wiley.com/doi/abs/10.1890/12-0429.1	22	HALL2013	2	5	1	71	TR	Tropical_and_subtropical_upland_rivers	Tocatins-Araguaia	BRAZIL	3°52'38.2"S	49°38'22.3"W	-3.87728	-49.6395	TUCURUI	TUCURUI	3	HYDRO	D	.	.	.	.	2349.1	310.19	2038.91	0.87	D	2.56492	762670	21.1	1984	1981	-3	23	B	36	.	.	.	Y*	.	.	1
Fishers' knowledge identifies environmental changes and fish abundance trends in impounded tropical rivers	Ecological Applications	2013	JOURNAL	Gustavo Hallwass, Priscila F. Lopes, Anastácio A. Juras, Renato A. M. Silvano	https://esajournals.onlinelibrary.wiley.com/doi/abs/10.1890/12-0429.1	22	HALL2013	2	6	2	71	TR	Tropical_and_subtropical_upland_rivers	Tocatins-Araguaia	BRAZIL	3°52'38.2"S	49°38'22.3"W	-3.87728	-49.6395	TUCURUI	TUCURUI	3	HYDRO	D	.	.	.	.	2349.1	310.19	2038.91	0.87	D	2.56492	762670	21.1	1984	2007	23	23	A	18	.	.	.	Y*	.	.	1
Spatiotemporal patterns of the fish assemblages downstream of the Gezhouba Dam on the Yangtze River	Science China Life Sciences	2012	JOURNAL	JiangPing Tao, YuTian Gong, XiChang Tan, Zhi Yang, JianBo Chang	https://rd.springer.com/article/10.1007%2Fs11427-012-4349-0?LI=true	23	TAO2012	4	1	1	72	T	Temperate_upland_rivers	Middle_Yangtze	CHINA	30°42'51.1"N	111°16'12.8"E	30.7142	111.27	TGR	GEZHOUBA	1	HYDRO	D	.	.	.	.	53.2	.	.	.	C	1.9419	978027	29.7	1988	2006	18	21	A	29	.	.	.	N	.	.	1
Spatiotemporal patterns of the fish assemblages downstream of the Gezhouba Dam on the Yangtze River	Science China Life Sciences	2012	JOURNAL	JiangPing Tao, YuTian Gong, XiChang Tan, Zhi Yang, JianBo Chang	https://rd.springer.com/article/10.1007%2Fs11427-012-4349-0?LI=true	23	TAO2012	4	2	2	72	T	Temperate_upland_rivers	Middle_Yangtze	CHINA	30°42'51.1"N	111°16'12.8"E	30.7142	111.27	TGR	GEZHOUBA	1	HYDRO	D	.	.	.	.	53.2	.	.	.	C	1.9419	978027	29.7	1988	2007	19	21	A	23	.	.	.	N	.	.	1
Spatiotemporal patterns of the fish assemblages downstream of the Gezhouba Dam on the Yangtze River	Science China Life Sciences	2012	JOURNAL	JiangPing Tao, YuTian Gong, XiChang Tan, Zhi Yang, JianBo Chang	https://rd.springer.com/article/10.1007%2Fs11427-012-4349-0?LI=true	23	TAO2012	4	3	3	72	T	Temperate_upland_rivers	Middle_Yangtze	CHINA	30°42'51.1"N	111°16'12.8"E	30.7142	111.27	TGR	GEZHOUBA	1	HYDRO	D	.	.	.	.	53.2	.	.	.	C	1.9419	978027	29.7	1988	2008	20	21	A	21	.	.	.	N	.	.	1
Spatiotemporal patterns of the fish assemblages downstream of the Gezhouba Dam on the Yangtze River	Science China Life Sciences	2012	JOURNAL	JiangPing Tao, YuTian Gong, XiChang Tan, Zhi Yang, JianBo Chang	https://rd.springer.com/article/10.1007%2Fs11427-012-4349-0?LI=true	23	TAO2012	4	4	4	72	T	Temperate_upland_rivers	Middle_Yangtze	CHINA	30°42'51.1"N	111°16'12.8"E	30.7142	111.27	TGR	GEZHOUBA	1	HYDRO	D	.	.	.	.	53.2	.	.	.	C	1.9419	978027	29.7	1988	2009	21	21	A	22	.	.	.	N	.	.	1
Immediate impacts of the second impoundment on fish communities in the Three Gorges Reservoir	Environmental Biology of Fishes	2010	JOURNAL	Xin Gao, Yu Zeng, Jianwei Wang, Huanzhang Liu	https://rd.springer.com/article/10.1007/s10641-009-9577-1	24	GAO2010	2	1	1	73	T	Temperate_upland_rivers	Middle_Yangtze	CHINA	30°49'35.1"N	111°00'30.7"E	30.8264	111.009	TGR	TGD	1	HYDRO	.	.	.	.	.	1084	.	.	.	C	.	.	.	2006	2005	-1	0	B	12	.	1.04	.	Y	.	.	1
Immediate impacts of the second impoundment on fish communities in the Three Gorges Reservoir	Environmental Biology of Fishes	2010	JOURNAL	Xin Gao, Yu Zeng, Jianwei Wang, Huanzhang Liu	https://rd.springer.com/article/10.1007/s10641-009-9577-1	24	GAO2010	2	2	2	73	T	Temperate_upland_rivers	Middle_Yangtze	CHINA	30°49'35.1"N	111°00'30.7"E	30.8264	111.009	TGR	TGD	1	HYDRO	UD	.	.	.	.	1084	.	.	.	C	.	.	.	2006	2006	0	0	F	21	.	1.57	.	Y	.	.	1
Meteorology and species composition of plant communities, birds and fishes before and after initial impoundment of Miharu Dam Reservoir, Japan	Landscape and Ecological Engineering	2012	JOURNAL	Kazuhiro Azami, Mariko Takemoto, Yasunori Otsuka, Satoshi Yamagishi, Shigekazu Nakazawa	https://rd.springer.com/article/10.1007/s11355-011-0170-3#Sec16	25	AZAM2012	9	1	1	74	T	Temperate_coastal_rivers	Honshu-Shikoku-Kyushu	JAPAN	37°24'23.7"N	140°28'51.7"E	37.4066	140.481	SAKURA	MIHARU	1	FLOOD_CONT	UD	.	2	8	.	1.95	0.06	1.89	0.97	L	15.0215	386.5	.	1996	1995	-1	9	B	12	0	.	.	N	.	.	0
Meteorology and species composition of plant communities, birds and fishes before and after initial impoundment of Miharu Dam Reservoir, Japan	Landscape and Ecological Engineering	2012	JOURNAL	Kazuhiro Azami, Mariko Takemoto, Yasunori Otsuka, Satoshi Yamagishi, Shigekazu Nakazawa	https://rd.springer.com/article/10.1007/s11355-011-0170-3#Sec16	25	AZAM2012	9	2	2	74	T	Temperate_coastal_rivers	Honshu-Shikoku-Kyushu	JAPAN	37°24'23.7"N	140°28'51.7"E	37.4066	140.481	SAKURA	MIHARU	1	FLOOD_CONT	UD	.	2	8	.	1.95	0.06	1.89	0.97	L	15.0215	386.5	.	1996	1996	0	9	A	11.5	0	.	.	N	.	.	0
Meteorology and species composition of plant communities, birds and fishes before and after initial impoundment of Miharu Dam Reservoir, Japan	Landscape and Ecological Engineering	2012	JOURNAL	Kazuhiro Azami, Mariko Takemoto, Yasunori Otsuka, Satoshi Yamagishi, Shigekazu Nakazawa	https://rd.springer.com/article/10.1007/s11355-011-0170-3#Sec16	25	AZAM2012	9	3	3	74	T	Temperate_coastal_rivers	Honshu-Shikoku-Kyushu	JAPAN	37°24'23.7"N	140°28'51.7"E	37.4066	140.481	SAKURA	MIHARU	1	FLOOD_CONT	UD	.	2	8	.	1.95	0.06	1.89	0.97	L	15.0215	386.5	.	1996	1999	3	9	A	6.5	1	.	.	N	.	.	0
Meteorology and species composition of plant communities, birds and fishes before and after initial impoundment of Miharu Dam Reservoir, Japan	Landscape and Ecological Engineering	2012	JOURNAL	Kazuhiro Azami, Mariko Takemoto, Yasunori Otsuka, Satoshi Yamagishi, Shigekazu Nakazawa	https://rd.springer.com/article/10.1007/s11355-011-0170-3#Sec16	25	AZAM2012	9	4	4	74	T	Temperate_coastal_rivers	Honshu-Shikoku-Kyushu	JAPAN	37°24'23.7"N	140°28'51.7"E	37.4066	140.481	SAKURA	MIHARU	1	FLOOD_CONT	UD	.	2	8	.	1.95	0.06	1.89	0.97	L	15.0215	386.5	.	1996	2000	4	9	A	7	1	.	.	N	.	.	0
Meteorology and species composition of plant communities, birds and fishes before and after initial impoundment of Miharu Dam Reservoir, Japan	Landscape and Ecological Engineering	2012	JOURNAL	Kazuhiro Azami, Mariko Takemoto, Yasunori Otsuka, Satoshi Yamagishi, Shigekazu Nakazawa	https://rd.springer.com/article/10.1007/s11355-011-0170-3#Sec16	25	AZAM2012	9	5	5	74	T	Temperate_coastal_rivers	Honshu-Shikoku-Kyushu	JAPAN	37°24'23.7"N	140°28'51.7"E	37.4066	140.481	SAKURA	MIHARU	1	FLOOD_CONT	UD	.	2	8	.	1.95	0.06	1.89	0.97	L	15.0215	386.5	.	1996	2001	5	9	A	5	2	.	.	N	.	.	0
Meteorology and species composition of plant communities, birds and fishes before and after initial impoundment of Miharu Dam Reservoir, Japan	Landscape and Ecological Engineering	2012	JOURNAL	Kazuhiro Azami, Mariko Takemoto, Yasunori Otsuka, Satoshi Yamagishi, Shigekazu Nakazawa	https://rd.springer.com/article/10.1007/s11355-011-0170-3#Sec16	25	AZAM2012	9	6	6	74	T	Temperate_coastal_rivers	Honshu-Shikoku-Kyushu	JAPAN	37°24'23.7"N	140°28'51.7"E	37.4066	140.481	SAKURA	MIHARU	1	FLOOD_CONT	UD	.	2	8	.	1.95	0.06	1.89	0.97	L	15.0215	386.5	.	1996	2002	6	9	A	6	2	.	.	N	.	.	0
Meteorology and species composition of plant communities, birds and fishes before and after initial impoundment of Miharu Dam Reservoir, Japan	Landscape and Ecological Engineering	2012	JOURNAL	Kazuhiro Azami, Mariko Takemoto, Yasunori Otsuka, Satoshi Yamagishi, Shigekazu Nakazawa	https://rd.springer.com/article/10.1007/s11355-011-0170-3#Sec16	25	AZAM2012	9	7	7	74	T	Temperate_coastal_rivers	Honshu-Shikoku-Kyushu	JAPAN	37°24'23.7"N	140°28'51.7"E	37.4066	140.481	SAKURA	MIHARU	1	FLOOD_CONT	UD	.	2	8	.	1.95	0.06	1.89	0.97	L	15.0215	386.5	.	1996	2003	7	9	A	6	2	.	.	N	.	.	0
Meteorology and species composition of plant communities, birds and fishes before and after initial impoundment of Miharu Dam Reservoir, Japan	Landscape and Ecological Engineering	2012	JOURNAL	Kazuhiro Azami, Mariko Takemoto, Yasunori Otsuka, Satoshi Yamagishi, Shigekazu Nakazawa	https://rd.springer.com/article/10.1007/s11355-011-0170-3#Sec16	25	AZAM2012	9	8	8	74	T	Temperate_coastal_rivers	Honshu-Shikoku-Kyushu	JAPAN	37°24'23.7"N	140°28'51.7"E	37.4066	140.481	SAKURA	MIHARU	1	FLOOD_CONT	UD	.	2	8	.	1.95	0.06	1.89	0.97	L	15.0215	386.5	.	1996	2004	8	9	A	8	2	.	.	N	.	.	0
Meteorology and species composition of plant communities, birds and fishes before and after initial impoundment of Miharu Dam Reservoir, Japan	Landscape and Ecological Engineering	2012	JOURNAL	Kazuhiro Azami, Mariko Takemoto, Yasunori Otsuka, Satoshi Yamagishi, Shigekazu Nakazawa	https://rd.springer.com/article/10.1007/s11355-011-0170-3#Sec16	25	AZAM2012	9	9	9	74	T	Temperate_coastal_rivers	Honshu-Shikoku-Kyushu	JAPAN	37°24'23.7"N	140°28'51.7"E	37.4066	140.481	SAKURA	MIHARU	1	FLOOD_CONT	UD	.	2	8	.	1.95	0.06	1.89	0.97	L	15.0215	386.5	.	1996	2005	9	9	A	6	2	.	.	N	.	.	0
Fish community structure of Weija Reservoir after 28 years of impoundment	Journal of Applied Science and Technology	2010	JOURNAL	Theodore Quarcoopome, Francis Amevenku & Patrick Ofori-Danson	http://www.scielo.sa.cr/scielo.php?pid=S0034-77442011000400022&script=sci_arttext	26	QUA2011	4	1	1	75	TR	Tropical_and_subtropical_floodplain_rivers_and_wetland_complexes	Volta	GHANA	6°08'03.3"N	0°06'45.3"E	6.13426	0.112582	KPONG	KPONG	1	MULTI	UD	.	.	.	.	25.2	2.09	23.11	0.92	L	1.88222	405019	5	1981	1979	-2	25	B	50	0	.	.	N	.	.	1
Fish community structure of Weija Reservoir after 28 years of impoundment	Journal of Applied Science and Technology	2010	JOURNAL	Theodore Quarcoopome, Francis Amevenku & Patrick Ofori-Danson	http://www.scielo.sa.cr/scielo.php?pid=S0034-77442011000400022&script=sci_arttext	26	QUA2011	4	2	2	75	TR	Tropical_and_subtropical_floodplain_rivers_and_wetland_complexes	Volta	GHANA	6°08'03.3"N	0°06'45.3"E	6.13426	0.112582	KPONG	KPONG	1	MULTI	UD	.	.	.	.	25.2	2.09	23.11	0.92	L	1.88222	405019	5	1981	1982	1	25	A	46	0	.	.	N	.	.	1
Fish community structure of Weija Reservoir after 28 years of impoundment	Journal of Applied Science and Technology	2010	JOURNAL	Theodore Quarcoopome, Francis Amevenku & Patrick Ofori-Danson	http://www.scielo.sa.cr/scielo.php?pid=S0034-77442011000400022&script=sci_arttext	26	QUA2011	4	3	3	75	TR	Tropical_and_subtropical_floodplain_rivers_and_wetland_complexes	Volta	GHANA	6°08'03.3"N	0°06'45.3"E	6.13426	0.112582	KPONG	KPONG	1	MULTI	UD	.	.	.	.	25.2	2.09	23.11	0.92	L	1.88222	405019	5	1981	1989	8	25	A	39	0	.	.	N	.	.	1
Fish community structure of Weija Reservoir after 28 years of impoundment	Journal of Applied Science and Technology	2010	JOURNAL	Theodore Quarcoopome, Francis Amevenku & Patrick Ofori-Danson	http://www.scielo.sa.cr/scielo.php?pid=S0034-77442011000400022&script=sci_arttext	26	QUA2011	4	4	4	75	TR	Tropical_and_subtropical_floodplain_rivers_and_wetland_complexes	Volta	GHANA	6°08'03.3"N	0°06'45.3"E	6.13426	0.112582	KPONG	KPONG	1	MULTI	UD	.	.	.	.	25.2	2.09	23.11	0.92	L	1.88222	405019	5	1981	2006	25	25	A	43	4	.	.	N	.	.	1
Impacts of Manwan Dam construction on aquatic habitat and community in Middle Reach of Lancang River	Procedia Environmental Sciences	2010	JOURNAL	Li Xiaoyan, Dong Shikui, Zhao Qinghe, Liu Shiliang	https://www.sciencedirect.com/science/article/pii/S1878029610001131	27	XIAO2010	2	1	1	76	TR	Tropical_and_subtropical_upland_rivers	Upper_Lancang_(Mekong)	CHINA	24°37'20.0"N	100°26'56.0"E	24.6222	100.449	MANWAN	MANWAN	1	HYDRO	UD	.	.	.	.	36.9	8.52	28.38	0.77	C	4.34961	108067	24.9	1986	1984	-2	10	B	37	0	.	.	N	.	.	0
Impacts of Manwan Dam construction on aquatic habitat and community in Middle Reach of Lancang River	Procedia Environmental Sciences	2010	JOURNAL	Li Xiaoyan, Dong Shikui, Zhao Qinghe, Liu Shiliang	https://www.sciencedirect.com/science/article/pii/S1878029610001131	27	XIAO2010	2	2	2	76	TR	Tropical_and_subtropical_upland_rivers	Upper_Lancang_(Mekong)	CHINA	24°37'20.0"N	100°26'56.0"E	24.6222	100.449	MANWAN	MANWAN	1	HYDRO	UD	.	.	.	.	36.9	8.52	28.38	0.77	C	4.34961	108067	24.9	1986	1996	10	10	A	64	12	.	.	N	.	.	0
Impacts of a reservoir on fish assemblages of small tributaries of the Corumbá river, Brazil	River Research and Applications	2009	JOURNAL	Tadeusz Penczak, Angelo A. Agostinho, Luiz C. Gomes, João D. Latini	https://onlinelibrary.wiley.com/doi/full/10.1002/rra.1200	28	PEN2009	2	1	1	77	TR	Tropical_and_subtropical_upland_rivers	Upper_Parana	BRAZIL	17°59'21.0"S	48°31'54.0"W	-17.9892	-48.5317	CORUMBA	CORUMBA	1	HYDRO	.	.	.	.	.	38.8	7.53	31.27	0.81	C	5.11722	27800	38.7	1997	1996	-1	1	B	13	.	.	.	N	.	.	1
Impacts of a reservoir on fish assemblages of small tributaries of the Corumbá river, Brazil	River Research and Applications	2009	JOURNAL	Tadeusz Penczak, Angelo A. Agostinho, Luiz C. Gomes, João D. Latini	https://onlinelibrary.wiley.com/doi/full/10.1002/rra.1200	28	PEN2009	2	2	2	77	TR	Tropical_and_subtropical_upland_rivers	Upper_Parana	BRAZIL	17°59'21.0"S	48°31'54.0"W	-17.9892	-48.5317	CORUMBA	CORUMBA	1	HYDRO	.	.	.	.	.	38.8	7.53	31.27	0.81	C	5.11722	27800	38.7	1997	1998	1	1	A	8.5	.	.	.	N	.	.	1
Impacts of a reservoir on fish assemblages of small tributaries of the Corumbá river, Brazil	River Research and Applications	2009	JOURNAL	Tadeusz Penczak, Angelo A. Agostinho, Luiz C. Gomes, João D. Latini	https://onlinelibrary.wiley.com/doi/full/10.1002/rra.1200	28	PEN2009	2	3	1	78	TR	Tropical_and_subtropical_upland_rivers	Upper_Parana	BRAZIL	17°59'21.0"S	48°31'54.0"W	-17.9892	-48.5317	CORUMBA	CORUMBA	2	HYDRO	.	.	.	.	.	38.8	7.53	31.27	0.81	C	5.11722	27800	38.7	1997	1996	-1	1	B	15.5	.	.	.	N	.	.	1
Impacts of a reservoir on fish assemblages of small tributaries of the Corumbá river, Brazil	River Research and Applications	2009	JOURNAL	Tadeusz Penczak, Angelo A. Agostinho, Luiz C. Gomes, João D. Latini	https://onlinelibrary.wiley.com/doi/full/10.1002/rra.1200	28	PEN2009	2	4	2	78	TR	Tropical_and_subtropical_upland_rivers	Upper_Parana	BRAZIL	17°59'21.0"S	48°31'54.0"W	-17.9892	-48.5317	CORUMBA	CORUMBA	2	HYDRO	.	.	.	.	.	38.8	7.53	31.27	0.81	C	5.11722	27800	38.7	1997	1998	1	1	A	15.6	.	.	.	N	.	.	1
Impacts of a reservoir on fish assemblages of small tributaries of the Corumbá river, Brazil	River Research and Applications	2009	JOURNAL	Tadeusz Penczak, Angelo A. Agostinho, Luiz C. Gomes, João D. Latini	https://onlinelibrary.wiley.com/doi/full/10.1002/rra.1200	28	PEN2009	2	5	1	79	TR	Tropical_and_subtropical_upland_rivers	Upper_Parana	BRAZIL	17°59'21.0"S	48°31'54.0"W	-17.9892	-48.5317	CORUMBA	CORUMBA	3	HYDRO	UR	.	.	.	.	38.8	7.53	31.27	0.81	C	5.11722	27800	38.7	1997	1996	-1	1	B	11.9	.	.	.	N	.	.	1
Impacts of a reservoir on fish assemblages of small tributaries of the Corumbá river, Brazil	River Research and Applications	2009	JOURNAL	Tadeusz Penczak, Angelo A. Agostinho, Luiz C. Gomes, João D. Latini	https://onlinelibrary.wiley.com/doi/full/10.1002/rra.1200	28	PEN2009	2	6	2	79	TR	Tropical_and_subtropical_upland_rivers	Upper_Parana	BRAZIL	17°59'21.0"S	48°31'54.0"W	-17.9892	-48.5317	CORUMBA	CORUMBA	3	HYDRO	UR	.	.	.	.	38.8	7.53	31.27	0.81	C	5.11722	27800	38.7	1997	1998	1	1	A	10.2	.	.	.	N	.	.	1
Impacts of a reservoir on fish assemblages of small tributaries of the Corumbá river, Brazil	River Research and Applications	2009	JOURNAL	Tadeusz Penczak, Angelo A. Agostinho, Luiz C. Gomes, João D. Latini	https://onlinelibrary.wiley.com/doi/full/10.1002/rra.1200	28	PEN2009	2	7	1	80	TR	Tropical_and_subtropical_upland_rivers	Upper_Parana	BRAZIL	17°59'21.0"S	48°31'54.0"W	-17.9892	-48.5317	CORUMBA	CORUMBA	4	HYDRO	UR	.	.	.	.	38.8	7.53	31.27	0.81	C	5.11722	27800	38.7	1997	1996	-1	1	B	17.1	.	.	.	N	.	.	1
Impacts of a reservoir on fish assemblages of small tributaries of the Corumbá river, Brazil	River Research and Applications	2009	JOURNAL	Tadeusz Penczak, Angelo A. Agostinho, Luiz C. Gomes, João D. Latini	https://onlinelibrary.wiley.com/doi/full/10.1002/rra.1200	28	PEN2009	2	8	2	80	TR	Tropical_and_subtropical_upland_rivers	Upper_Parana	BRAZIL	17°59'21.0"S	48°31'54.0"W	-17.9892	-48.5317	CORUMBA	CORUMBA	4	HYDRO	UR	.	.	.	.	38.8	7.53	31.27	0.81	C	5.11722	27800	38.7	1997	1998	1	1	A	16	.	.	.	N	.	.	1
Historical Fish Assemblage Flux in the Cheyenne River below Angostura Dam	Journal of Freshwater Ecology	2007	JOURNAL	Christopher W. Hoagstrom, Austin C. DeWitte, Nathan J.C. Gosch, Charles R. Berry Jr	https://www.tandfonline.com/doi/abs/10.1080/02705060.2007.9665041	29	HOAG2007	4	1	1	81	T	Temperate_upland_rivers	Upper_Missouri	USA	43°20'36.0"N	103°26'16.0"W	43.3433	-103.438	ANGOSTURA	ANGOSTURA	1	IRRIGATION	D	.	.	.	.	18.7	1.8	16.9	0.9	L	2.10356	23569	6.2	1948	1892	-56	56	B	9	0	.	.	N	.	.	0
Historical Fish Assemblage Flux in the Cheyenne River below Angostura Dam	Journal of Freshwater Ecology	2007	JOURNAL	Christopher W. Hoagstrom, Austin C. DeWitte, Nathan J.C. Gosch, Charles R. Berry Jr	https://www.tandfonline.com/doi/abs/10.1080/02705060.2007.9665041	29	HOAG2007	4	2	2	81	T	Temperate_upland_rivers	Upper_Missouri	USA	43°20'36.0"N	103°26'16.0"W	43.3433	-103.438	ANGOSTURA	ANGOSTURA	1	IRRIGATION	D	.	.	.	.	18.7	1.8	16.9	0.9	L	2.10356	23569	6.2	1948	1950	2	56	A	9	0	.	.	N	.	.	0
Historical Fish Assemblage Flux in the Cheyenne River below Angostura Dam	Journal of Freshwater Ecology	2007	JOURNAL	Christopher W. Hoagstrom, Austin C. DeWitte, Nathan J.C. Gosch, Charles R. Berry Jr	https://www.tandfonline.com/doi/abs/10.1080/02705060.2007.9665041	29	HOAG2007	4	3	3	81	T	Temperate_upland_rivers	Upper_Missouri	USA	43°20'36.0"N	103°26'16.0"W	43.3433	-103.438	ANGOSTURA	ANGOSTURA	1	IRRIGATION	D	.	.	.	.	18.7	1.8	16.9	0.9	L	2.10356	23569	6.2	1948	1996	48	56	A	21	6	.	.	Y	.	.	0
Historical Fish Assemblage Flux in the Cheyenne River below Angostura Dam	Journal of Freshwater Ecology	2007	JOURNAL	Christopher W. Hoagstrom, Austin C. DeWitte, Nathan J.C. Gosch, Charles R. Berry Jr	https://www.tandfonline.com/doi/abs/10.1080/02705060.2007.9665041	29	HOAG2007	4	4	4	81	T	Temperate_upland_rivers	Upper_Missouri	USA	43°20'36.0"N	103°26'16.0"W	43.3433	-103.438	ANGOSTURA	ANGOSTURA	1	IRRIGATION	D	.	.	.	.	18.7	1.8	16.9	0.9	L	2.10356	23569	6.2	1948	2004	56	56	A	16	6	.	.	Y	.	.	0
Fish assemblage structure following impoundment of a Great Plains river	Western North American Naturalist	2005	JOURNAL	Michael C. Quist, Wayne A. Hubert and Frank J. Rahel	http://www.jstor.org/stable/41717422	30	QUIS2005	4	1	1	82	T	Temperate_floodplain_rivers_and_wetlands	Middle_Missouri	USA	42°08'38.0"N	104°44'01.1"W	42.1439	-104.734	GRAYROCKS	GRAYROCKS	1	COOLING	D	.	.	.	.	14.4	0.73	13.67	0.95	L	1.95462	11614	17.7	1980	1970	-10	10	B	17	2	2.971	0.948	Y	3.028	0.66	0
Fish assemblage structure following impoundment of a Great Plains river	Western North American Naturalist	2005	JOURNAL	Michael C. Quist, Wayne A. Hubert and Frank J. Rahel	http://www.jstor.org/stable/41717422	30	QUIS2005	4	2	2	82	T	Temperate_floodplain_rivers_and_wetlands	Middle_Missouri	USA	42°08'38.0"N	104°44'01.1"W	42.1439	-104.734	GRAYROCKS	GRAYROCKS	1	COOLING	D	.	.	.	.	14.4	0.73	13.67	0.95	L	1.95462	11614	17.7	1980	1990	10	10	A	22	7	3.011	0.947	Y	3.059	0.707	0
Fish assemblage structure following impoundment of a Great Plains river	Western North American Naturalist	2005	JOURNAL	Michael C. Quist, Wayne A. Hubert and Frank J. Rahel	http://www.jstor.org/stable/41717422	30	QUIS2005	4	3	3	82	T	Temperate_floodplain_rivers_and_wetlands	Middle_Missouri	USA	42°08'38.0"N	104°44'01.1"W	42.1439	-104.734	GRAYROCKS	GRAYROCKS	2	COOLING	UR	.	.	.	.	14.4	0.73	13.67	0.95	L	1.95462	11614	17.7	1980	1970	-10	10	B	23	2	2.74	0.967	Y	2.894	0.742	0
Fish assemblage structure following impoundment of a Great Plains river	Western North American Naturalist	2005	JOURNAL	Michael C. Quist, Wayne A. Hubert and Frank J. Rahel	http://www.jstor.org/stable/41717422	30	QUIS2005	4	4	4	82	T	Temperate_floodplain_rivers_and_wetlands	Middle_Missouri	USA	42°08'38.0"N	104°44'01.1"W	42.1439	-104.734	GRAYROCKS	GRAYROCKS	2	COOLING	UR	.	.	.	.	14.4	0.73	13.67	0.95	L	1.95462	11614	17.7	1980	1990	10	10	A	24	5	3.078	0.945	Y	3.212	0.821	0
Fish Assemblage Structure from 20 Years of Collections in the Kiamichi River, Oklahoma	The Southwestern Naturalist	1998	JOURNAL	Mark Pyron, Caryn C. Vaughn, Matthew R. Winston and Jimmie Pigg	https://www.jstor.org/stable/30055378	31	PYR1998	3	1	1	83	T	Temperate_upland_rivers	Ouachita_Highlands	USA	34°03'59.8"N	95°24'50.6"W	34.0666	-95.4141	HUGO	HUGO	1	FLOOD_CONT	UR	39.74	.	10	.	53.2	2.8	50.4	0.95	L	1.63138	3714	32.8	1974	1972	-2	15	B	15.6714	.	.	.	N	.	.	0
Fish Assemblage Structure from 20 Years of Collections in the Kiamichi River, Oklahoma	The Southwestern Naturalist	1998	JOURNAL	Mark Pyron, Caryn C. Vaughn, Matthew R. Winston and Jimmie Pigg	https://www.jstor.org/stable/30055378	31	PYR1998	3	2	2	83	T	Temperate_upland_rivers	Ouachita_Highlands	USA	34°03'59.8"N	95°24'50.6"W	34.0666	-95.4141	HUGO	HUGO	1	FLOOD_CONT	UR	39.74	.	10	.	53.2	2.8	50.4	0.95	L	1.63138	3714	32.8	1974	1980	6	15	A	13.0763	.	.	.	N	.	.	0
Fish Assemblage Structure from 20 Years of Collections in the Kiamichi River, Oklahoma	The Southwestern Naturalist	1998	JOURNAL	Mark Pyron, Caryn C. Vaughn, Matthew R. Winston and Jimmie Pigg	https://www.jstor.org/stable/30055378	31	PYR1998	3	3	3	83	T	Temperate_upland_rivers	Ouachita_Highlands	USA	34°03'59.8"N	95°24'50.6"W	34.0666	-95.4141	HUGO	HUGO	1	FLOOD_CONT	UR	39.74	.	10	.	53.2	2.8	50.4	0.95	L	1.63138	3714	32.8	1974	1989	15	15	A	13.4998	.	.	.	N	.	.	0
Fish Assemblage Structure from 20 Years of Collections in the Kiamichi River, Oklahoma	The Southwestern Naturalist	1998	JOURNAL	Mark Pyron, Caryn C. Vaughn, Matthew R. Winston and Jimmie Pigg	https://www.jstor.org/stable/30055378	31	PYR1998	2	4	1	84	T	Temperate_upland_rivers	Ouachita_Highlands	USA	34°03'59.8"N	95°24'50.6"W	34.0666	-95.4141	HUGO	HUGO	2	FLOOD_CONT	UR	69.85	.	10	.	53.2	2.8	50.4	0.95	L	1.63138	3714	32.8	1974	1972	-2	15	B	21.126	.	.	.	N	.	.	0
Fish Assemblage Structure from 20 Years of Collections in the Kiamichi River, Oklahoma	The Southwestern Naturalist	1998	JOURNAL	Mark Pyron, Caryn C. Vaughn, Matthew R. Winston and Jimmie Pigg	https://www.jstor.org/stable/30055378	31	PYR1998	2	5	2	84	T	Temperate_upland_rivers	Ouachita_Highlands	USA	34°03'59.8"N	95°24'50.6"W	34.0666	-95.4141	HUGO	HUGO	2	FLOOD_CONT	UR	69.85	.	10	.	53.2	2.8	50.4	0.95	L	1.63138	3714	32.8	1974	1989	15	15	A	15.0891	.	.	.	N	.	.	0
Fish Assemblage Structure from 20 Years of Collections in the Kiamichi River, Oklahoma	The Southwestern Naturalist	1998	JOURNAL	Mark Pyron, Caryn C. Vaughn, Matthew R. Winston and Jimmie Pigg	https://www.jstor.org/stable/30055378	31	PYR1998	2	6	1	85	T	Temperate_upland_rivers	Ouachita_Highlands	USA	34°03'59.8"N	95°24'50.6"W	34.0666	-95.4141	HUGO	HUGO	3	FLOOD_CONT	UR	80.82	.	10	.	53.2	2.8	50.4	0.95	L	1.63138	3714	32.8	1974	1972	-2	15	B	16.4958	.	.	.	N	.	.	0
Fish Assemblage Structure from 20 Years of Collections in the Kiamichi River, Oklahoma	The Southwestern Naturalist	1998	JOURNAL	Mark Pyron, Caryn C. Vaughn, Matthew R. Winston and Jimmie Pigg	https://www.jstor.org/stable/30055378	31	PYR1998	2	7	2	85	T	Temperate_upland_rivers	Ouachita_Highlands	USA	34°03'59.8"N	95°24'50.6"W	34.0666	-95.4141	HUGO	HUGO	3	FLOOD_CONT	UR	80.82	.	10	.	53.2	2.8	50.4	0.95	L	1.63138	3714	32.8	1974	1989	15	15	A	16.3315	.	.	.	N	.	.	0
Fish Assemblage Structure from 20 Years of Collections in the Kiamichi River, Oklahoma	The Southwestern Naturalist	1998	JOURNAL	Mark Pyron, Caryn C. Vaughn, Matthew R. Winston and Jimmie Pigg	https://www.jstor.org/stable/30055378	31	PYR1998	3	8	1	86	T	Temperate_upland_rivers	Ouachita_Highlands	USA	34°03'59.8"N	95°24'50.6"W	34.0666	-95.4141	HUGO	HUGO	4	FLOOD_CONT	UR	87.83	.	10	.	53.2	2.8	50.4	0.95	L	1.63138	3714	32.8	1974	1972	-2	15	B	21.0477	.	.	.	N	.	.	0
Fish Assemblage Structure from 20 Years of Collections in the Kiamichi River, Oklahoma	The Southwestern Naturalist	1998	JOURNAL	Mark Pyron, Caryn C. Vaughn, Matthew R. Winston and Jimmie Pigg	https://www.jstor.org/stable/30055378	31	PYR1998	3	9	2	86	T	Temperate_upland_rivers	Ouachita_Highlands	USA	34°03'59.8"N	95°24'50.6"W	34.0666	-95.4141	HUGO	HUGO	4	FLOOD_CONT	UR	87.83	.	10	.	53.2	2.8	50.4	0.95	L	1.63138	3714	32.8	1974	1980	6	15	A	18.1936	.	.	.	N	.	.	0
Fish Assemblage Structure from 20 Years of Collections in the Kiamichi River, Oklahoma	The Southwestern Naturalist	1998	JOURNAL	Mark Pyron, Caryn C. Vaughn, Matthew R. Winston and Jimmie Pigg	https://www.jstor.org/stable/30055378	31	PYR1998	3	10	3	86	T	Temperate_upland_rivers	Ouachita_Highlands	USA	34°03'59.8"N	95°24'50.6"W	34.0666	-95.4141	HUGO	HUGO	4	FLOOD_CONT	UR	87.83	.	10	.	53.2	2.8	50.4	0.95	L	1.63138	3714	32.8	1974	1989	15	15	A	15.8645	.	.	.	N	.	.	0
Fish Assemblage Structure from 20 Years of Collections in the Kiamichi River, Oklahoma	The Southwestern Naturalist	1998	JOURNAL	Mark Pyron, Caryn C. Vaughn, Matthew R. Winston and Jimmie Pigg	https://www.jstor.org/stable/30055378	31	PYR1998	2	11	1	87	T	Temperate_upland_rivers	Ouachita_Highlands	USA	34°03'59.8"N	95°24'50.6"W	34.0666	-95.4141	HUGO	HUGO	5	FLOOD_CONT	UR	101.22	.	10	.	53.2	2.8	50.4	0.95	L	1.63138	3714	32.8	1974	1972	-2	15	B	9.02307	.	.	.	N	.	.	0
Fish Assemblage Structure from 20 Years of Collections in the Kiamichi River, Oklahoma	The Southwestern Naturalist	1998	JOURNAL	Mark Pyron, Caryn C. Vaughn, Matthew R. Winston and Jimmie Pigg	https://www.jstor.org/stable/30055378	31	PYR1998	2	12	2	87	T	Temperate_upland_rivers	Ouachita_Highlands	USA	34°03'59.8"N	95°24'50.6"W	34.0666	-95.4141	HUGO	HUGO	5	FLOOD_CONT	UR	101.22	.	10	.	53.2	2.8	50.4	0.95	L	1.63138	3714	32.8	1974	1989	15	15	A	10.9636	.	.	.	N	.	.	0
Fish Assemblage Structure from 20 Years of Collections in the Kiamichi River, Oklahoma	The Southwestern Naturalist	1998	JOURNAL	Mark Pyron, Caryn C. Vaughn, Matthew R. Winston and Jimmie Pigg	https://www.jstor.org/stable/30055378	31	PYR1998	2	13	1	88	T	Temperate_upland_rivers	Ouachita_Highlands	USA	34°03'59.8"N	95°24'50.6"W	34.0666	-95.4141	HUGO	HUGO	6	FLOOD_CONT	UR	120.91	.	10	.	53.2	2.8	50.4	0.95	L	1.63138	3714	32.8	1974	1972	-2	15	B	17.0747	.	.	.	N	.	.	0
Fish Assemblage Structure from 20 Years of Collections in the Kiamichi River, Oklahoma	The Southwestern Naturalist	1998	JOURNAL	Mark Pyron, Caryn C. Vaughn, Matthew R. Winston and Jimmie Pigg	https://www.jstor.org/stable/30055378	31	PYR1998	2	14	2	88	T	Temperate_upland_rivers	Ouachita_Highlands	USA	34°03'59.8"N	95°24'50.6"W	34.0666	-95.4141	HUGO	HUGO	6	FLOOD_CONT	UR	120.91	.	10	.	53.2	2.8	50.4	0.95	L	1.63138	3714	32.8	1974	1989	15	15	A	13.1015	.	.	.	N	.	.	0
Fish Assemblage Structure from 20 Years of Collections in the Kiamichi River, Oklahoma	The Southwestern Naturalist	1998	JOURNAL	Mark Pyron, Caryn C. Vaughn, Matthew R. Winston and Jimmie Pigg	https://www.jstor.org/stable/30055378	31	PYR1998	3	15	1	89	T	Temperate_upland_rivers	Ouachita_Highlands	USA	34°03'59.8"N	95°24'50.6"W	34.0666	-95.4141	HUGO	HUGO	7	FLOOD_CONT	UR	134.11	.	10	.	53.2	2.8	50.4	0.95	L	1.63138	3714	32.8	1974	1972	-2	15	B	12.1138	.	.	.	N	.	.	0
Fish Assemblage Structure from 20 Years of Collections in the Kiamichi River, Oklahoma	The Southwestern Naturalist	1998	JOURNAL	Mark Pyron, Caryn C. Vaughn, Matthew R. Winston and Jimmie Pigg	https://www.jstor.org/stable/30055378	31	PYR1998	3	16	2	89	T	Temperate_upland_rivers	Ouachita_Highlands	USA	34°03'59.8"N	95°24'50.6"W	34.0666	-95.4141	HUGO	HUGO	7	FLOOD_CONT	UR	134.11	.	10	.	53.2	2.8	50.4	0.95	L	1.63138	3714	32.8	1974	1980	6	15	A	12.0108	.	.	.	N	.	.	0
Fish Assemblage Structure from 20 Years of Collections in the Kiamichi River, Oklahoma	The Southwestern Naturalist	1998	JOURNAL	Mark Pyron, Caryn C. Vaughn, Matthew R. Winston and Jimmie Pigg	https://www.jstor.org/stable/30055378	31	PYR1998	3	17	3	89	T	Temperate_upland_rivers	Ouachita_Highlands	USA	34°03'59.8"N	95°24'50.6"W	34.0666	-95.4141	HUGO	HUGO	7	FLOOD_CONT	UR	134.11	.	10	.	53.2	2.8	50.4	0.95	L	1.63138	3714	32.8	1974	1989	15	15	A	14.2444	.	.	.	N	.	.	0
Fish Assemblage Structure from 20 Years of Collections in the Kiamichi River, Oklahoma	The Southwestern Naturalist	1998	JOURNAL	Mark Pyron, Caryn C. Vaughn, Matthew R. Winston and Jimmie Pigg	https://www.jstor.org/stable/30055378	31	PYR1998	3	18	1	90	T	Temperate_upland_rivers	Ouachita_Highlands	USA	34°03'59.8"N	95°24'50.6"W	34.0666	-95.4141	HUGO	HUGO	8	FLOOD_CONT	UR	152.23	.	10	.	53.2	2.8	50.4	0.95	L	1.63138	3714	32.8	1974	1972	-2	15	B	12.9798	.	.	.	N	.	.	0
Fish Assemblage Structure from 20 Years of Collections in the Kiamichi River, Oklahoma	The Southwestern Naturalist	1998	JOURNAL	Mark Pyron, Caryn C. Vaughn, Matthew R. Winston and Jimmie Pigg	https://www.jstor.org/stable/30055378	31	PYR1998	3	19	2	90	T	Temperate_upland_rivers	Ouachita_Highlands	USA	34°03'59.8"N	95°24'50.6"W	34.0666	-95.4141	HUGO	HUGO	8	FLOOD_CONT	UR	152.23	.	10	.	53.2	2.8	50.4	0.95	L	1.63138	3714	32.8	1974	1980	6	15	A	9.03759	.	.	.	N	.	.	0
Fish Assemblage Structure from 20 Years of Collections in the Kiamichi River, Oklahoma	The Southwestern Naturalist	1998	JOURNAL	Mark Pyron, Caryn C. Vaughn, Matthew R. Winston and Jimmie Pigg	https://www.jstor.org/stable/30055378	31	PYR1998	3	20	3	90	T	Temperate_upland_rivers	Ouachita_Highlands	USA	34°03'59.8"N	95°24'50.6"W	34.0666	-95.4141	HUGO	HUGO	8	FLOOD_CONT	UR	152.23	.	10	.	53.2	2.8	50.4	0.95	L	1.63138	3714	32.8	1974	1989	15	15	A	13.4728	.	.	.	N	.	.	0
Fish Assemblage Structure from 20 Years of Collections in the Kiamichi River, Oklahoma	The Southwestern Naturalist	1998	JOURNAL	Mark Pyron, Caryn C. Vaughn, Matthew R. Winston and Jimmie Pigg	https://www.jstor.org/stable/30055378	31	PYR1998	3	21	1	91	T	Temperate_upland_rivers	Ouachita_Highlands	USA	34°03'59.8"N	95°24'50.6"W	34.0666	-95.4141	HUGO	HUGO	9	FLOOD_CONT	UR	163.49	.	10	.	53.2	2.8	50.4	0.95	L	1.63138	3714	32.8	1974	1972	-2	15	B	9.45837	.	.	.	N	.	.	0
Fish Assemblage Structure from 20 Years of Collections in the Kiamichi River, Oklahoma	The Southwestern Naturalist	1998	JOURNAL	Mark Pyron, Caryn C. Vaughn, Matthew R. Winston and Jimmie Pigg	https://www.jstor.org/stable/30055378	31	PYR1998	3	22	2	91	T	Temperate_upland_rivers	Ouachita_Highlands	USA	34°03'59.8"N	95°24'50.6"W	34.0666	-95.4141	HUGO	HUGO	9	FLOOD_CONT	UR	164.49	.	10	.	53.2	2.8	50.4	0.95	L	1.63138	3714	32.8	1974	1980	6	15	A	9.94507	.	.	.	N	.	.	0
Fish Assemblage Structure from 20 Years of Collections in the Kiamichi River, Oklahoma	The Southwestern Naturalist	1998	JOURNAL	Mark Pyron, Caryn C. Vaughn, Matthew R. Winston and Jimmie Pigg	https://www.jstor.org/stable/30055378	31	PYR1998	3	23	3	91	T	Temperate_upland_rivers	Ouachita_Highlands	USA	34°03'59.8"N	95°24'50.6"W	34.0666	-95.4141	HUGO	HUGO	9	FLOOD_CONT	UR	165.49	.	10	.	53.2	2.8	50.4	0.95	L	1.63138	3714	32.8	1974	1989	15	15	A	11.5528	.	.	.	N	.	.	0
Long-term changes in fish assemblage following the impoundments of the Three Gorges Reservoir in Hejiang, a protected reach of the upper Yangtze River	Knowledge and Management of Aquatic Ecosystems	2012	JOURNAL	F. Liu, J. Wang and W. Cao	https://www.kmae-journal.org/articles/kmae/abs/2012/04/kmae120061/kmae120061.html	32	LIU2012	15	1	1	92	T	Temperate_upland_rivers	Middle_Yangtze	CHINA	30°49'35.1"N	111°00'30.7"E	30.8264	111.009	TGR	TGD	1	HYDRO	UR	654.9	7	.	.	1084	472.35	611.65	0.56	C	2.02242	976983	46.1	2003	1997	-6	8	B	37	.	2.327	0.645	Y	3.384	.	0
Long-term changes in fish assemblage following the impoundments of the Three Gorges Reservoir in Hejiang, a protected reach of the upper Yangtze River	Knowledge and Management of Aquatic Ecosystems	2012	JOURNAL	F. Liu, J. Wang and W. Cao	https://www.kmae-journal.org/articles/kmae/abs/2012/04/kmae120061/kmae120061.html	32	LIU2012	15	2	2	92	T	Temperate_upland_rivers	Middle_Yangtze	CHINA	30°49'35.1"N	111°00'30.7"E	30.8264	111.009	TGR	TGD	1	HYDRO	UR	654.9	7	.	.	1084	472.35	611.65	0.56	C	2.02242	976983	46.1	2003	1998	-5	8	B	33	.	2.337	0.668	Y	3.292	.	0
Long-term changes in fish assemblage following the impoundments of the Three Gorges Reservoir in Hejiang, a protected reach of the upper Yangtze River	Knowledge and Management of Aquatic Ecosystems	2012	JOURNAL	F. Liu, J. Wang and W. Cao	https://www.kmae-journal.org/articles/kmae/abs/2012/04/kmae120061/kmae120061.html	32	LIU2012	15	3	3	92	T	Temperate_upland_rivers	Middle_Yangtze	CHINA	30°49'35.1"N	111°00'30.7"E	30.8264	111.009	TGR	TGD	1	HYDRO	UR	654.9	7	.	.	1084	472.35	611.65	0.56	C	2.02242	976983	46.1	2003	1999	-4	8	B	42	.	2.311	0.618	Y	3.311	.	0
Long-term changes in fish assemblage following the impoundments of the Three Gorges Reservoir in Hejiang, a protected reach of the upper Yangtze River	Knowledge and Management of Aquatic Ecosystems	2012	JOURNAL	F. Liu, J. Wang and W. Cao	https://www.kmae-journal.org/articles/kmae/abs/2012/04/kmae120061/kmae120061.html	32	LIU2012	15	4	4	92	T	Temperate_upland_rivers	Middle_Yangtze	CHINA	30°49'35.1"N	111°00'30.7"E	30.8264	111.009	TGR	TGD	1	HYDRO	UR	654.9	7	.	.	1084	472.35	611.65	0.56	C	2.02242	976983	46.1	2003	2000	-3	8	B	36	.	2.249	0.628	Y	3.464	.	0
Long-term changes in fish assemblage following the impoundments of the Three Gorges Reservoir in Hejiang, a protected reach of the upper Yangtze River	Knowledge and Management of Aquatic Ecosystems	2012	JOURNAL	F. Liu, J. Wang and W. Cao	https://www.kmae-journal.org/articles/kmae/abs/2012/04/kmae120061/kmae120061.html	32	LIU2012	15	5	5	92	T	Temperate_upland_rivers	Middle_Yangtze	CHINA	30°49'35.1"N	111°00'30.7"E	30.8264	111.009	TGR	TGD	1	HYDRO	UR	654.9	7	.	.	1084	472.35	611.65	0.56	C	2.02242	976983	46.1	2003	2001	-2	8	B	39	.	2.031	0.554	Y	3.393	.	0
Long-term changes in fish assemblage following the impoundments of the Three Gorges Reservoir in Hejiang, a protected reach of the upper Yangtze River	Knowledge and Management of Aquatic Ecosystems	2012	JOURNAL	F. Liu, J. Wang and W. Cao	https://www.kmae-journal.org/articles/kmae/abs/2012/04/kmae120061/kmae120061.html	32	LIU2012	15	6	6	92	T	Temperate_upland_rivers	Middle_Yangtze	CHINA	30°49'35.1"N	111°00'30.7"E	30.8264	111.009	TGR	TGD	1	HYDRO	UR	654.9	7	.	.	1084	472.35	611.65	0.56	C	2.02242	976983	46.1	2003	2002	-1	8	B	36	.	1.938	0.541	Y	3.417	.	0
Long-term changes in fish assemblage following the impoundments of the Three Gorges Reservoir in Hejiang, a protected reach of the upper Yangtze River	Knowledge and Management of Aquatic Ecosystems	2012	JOURNAL	F. Liu, J. Wang and W. Cao	https://www.kmae-journal.org/articles/kmae/abs/2012/04/kmae120061/kmae120061.html	32	LIU2012	15	7	7	92	T	Temperate_upland_rivers	Middle_Yangtze	CHINA	30°49'35.1"N	111°00'30.7"E	30.8264	111.009	TGR	TGD	1	HYDRO	UR	654.9	7	.	.	1084	472.35	611.65	0.56	C	2.02242	976983	46.1	2003	2003	0	8	A	19	.	1.596	0.542	Y	3.431	.	0
Long-term changes in fish assemblage following the impoundments of the Three Gorges Reservoir in Hejiang, a protected reach of the upper Yangtze River	Knowledge and Management of Aquatic Ecosystems	2012	JOURNAL	F. Liu, J. Wang and W. Cao	https://www.kmae-journal.org/articles/kmae/abs/2012/04/kmae120061/kmae120061.html	32	LIU2012	15	8	8	92	T	Temperate_upland_rivers	Middle_Yangtze	CHINA	30°49'35.1"N	111°00'30.7"E	30.8264	111.009	TGR	TGD	1	HYDRO	UR	654.9	7	.	.	1084	472.35	611.65	0.56	C	2.02242	976983	46.1	2003	2004	1	8	A	28	.	2.125	0.638	Y	3.407	.	0
Long-term changes in fish assemblage following the impoundments of the Three Gorges Reservoir in Hejiang, a protected reach of the upper Yangtze River	Knowledge and Management of Aquatic Ecosystems	2012	JOURNAL	F. Liu, J. Wang and W. Cao	https://www.kmae-journal.org/articles/kmae/abs/2012/04/kmae120061/kmae120061.html	32	LIU2012	15	9	9	92	T	Temperate_upland_rivers	Middle_Yangtze	CHINA	30°49'35.1"N	111°00'30.7"E	30.8264	111.009	TGR	TGD	1	HYDRO	UR	654.9	7	.	.	1084	472.35	611.65	0.56	C	2.02242	976983	46.1	2003	2005	2	8	A	35	.	1.974	0.555	Y	3.275	.	0
Long-term changes in fish assemblage following the impoundments of the Three Gorges Reservoir in Hejiang, a protected reach of the upper Yangtze River	Knowledge and Management of Aquatic Ecosystems	2012	JOURNAL	F. Liu, J. Wang and W. Cao	https://www.kmae-journal.org/articles/kmae/abs/2012/04/kmae120061/kmae120061.html	32	LIU2012	15	10	10	92	T	Temperate_upland_rivers	Middle_Yangtze	CHINA	30°49'35.1"N	111°00'30.7"E	30.8264	111.009	TGR	TGD	1	HYDRO	UR	654.9	7	.	.	1084	472.35	611.65	0.56	C	2.02242	976983	46.1	2003	2006	3	8	A	40	.	2.114	0.573	Y	3.413	.	0
Long-term changes in fish assemblage following the impoundments of the Three Gorges Reservoir in Hejiang, a protected reach of the upper Yangtze River	Knowledge and Management of Aquatic Ecosystems	2012	JOURNAL	F. Liu, J. Wang and W. Cao	https://www.kmae-journal.org/articles/kmae/abs/2012/04/kmae120061/kmae120061.html	32	LIU2012	15	11	11	92	T	Temperate_upland_rivers	Middle_Yangtze	CHINA	30°49'35.1"N	111°00'30.7"E	30.8264	111.009	TGR	TGD	1	HYDRO	UR	654.9	7	.	.	1084	472.35	611.65	0.56	C	2.02242	976983	46.1	2003	2007	4	8	A	20	.	1.912	0.638	Y	3.382	.	0
Long-term changes in fish assemblage following the impoundments of the Three Gorges Reservoir in Hejiang, a protected reach of the upper Yangtze River	Knowledge and Management of Aquatic Ecosystems	2012	JOURNAL	F. Liu, J. Wang and W. Cao	https://www.kmae-journal.org/articles/kmae/abs/2012/04/kmae120061/kmae120061.html	32	LIU2012	15	12	12	92	T	Temperate_upland_rivers	Middle_Yangtze	CHINA	30°49'35.1"N	111°00'30.7"E	30.8264	111.009	TGR	TGD	1	HYDRO	UR	654.9	7	.	.	1084	472.35	611.65	0.56	C	2.02242	976983	46.1	2003	2008	5	8	A	21	.	1.771	0.582	Y	3.408	.	0
Long-term changes in fish assemblage following the impoundments of the Three Gorges Reservoir in Hejiang, a protected reach of the upper Yangtze River	Knowledge and Management of Aquatic Ecosystems	2012	JOURNAL	F. Liu, J. Wang and W. Cao	https://www.kmae-journal.org/articles/kmae/abs/2012/04/kmae120061/kmae120061.html	32	LIU2012	15	13	13	92	T	Temperate_upland_rivers	Middle_Yangtze	CHINA	30°49'35.1"N	111°00'30.7"E	30.8264	111.009	TGR	TGD	1	HYDRO	UR	654.9	7	.	.	1084	472.35	611.65	0.56	C	2.02242	976983	46.1	2003	2009	6	8	A	34	.	1.972	0.559	Y	3.351	.	0
Long-term changes in fish assemblage following the impoundments of the Three Gorges Reservoir in Hejiang, a protected reach of the upper Yangtze River	Knowledge and Management of Aquatic Ecosystems	2012	JOURNAL	F. Liu, J. Wang and W. Cao	https://www.kmae-journal.org/articles/kmae/abs/2012/04/kmae120061/kmae120061.html	32	LIU2012	15	14	14	92	T	Temperate_upland_rivers	Middle_Yangtze	CHINA	30°49'35.1"N	111°00'30.7"E	30.8264	111.009	TGR	TGD	1	HYDRO	UR	654.9	7	.	.	1084	472.35	611.65	0.56	C	2.02242	976983	46.1	2003	2010	7	8	A	27	.	1.872	0.568	Y	3.281	.	0
Long-term changes in fish assemblage following the impoundments of the Three Gorges Reservoir in Hejiang, a protected reach of the upper Yangtze River	Knowledge and Management of Aquatic Ecosystems	2012	JOURNAL	F. Liu, J. Wang and W. Cao	https://www.kmae-journal.org/articles/kmae/abs/2012/04/kmae120061/kmae120061.html	32	LIU2012	15	15	15	92	T	Temperate_upland_rivers	Middle_Yangtze	CHINA	30°49'35.1"N	111°00'30.7"E	30.8264	111.009	TGR	TGD	2	HYDRO	UR	654.9	7	.	.	1084	472.35	611.65	0.56	C	2.02242	976983	46.1	2003	2011	8	8	A	45	.	2.555	0.671	Y	3.118	.	0
Effects of damming on the biological integrity of fish assemblages in the middle Lancang-Mekong River basin	Ecological Indicators	2013	JOURNAL	Jinpeng Li, Shikui Dong, Mingchun Peng, Zhifeng Yang, Shiliang Liu, Xiaoyan Li, ChenZhao	https://www.sciencedirect.com/science/article/pii/S1470160X13001799	33	LI2013	3	1	1	93	TR	Tropical_and_subtropical_upland_rivers	Upper_Lancang_(Mekong)	CHINA	24°42'11.0"N	100°05'31.0"E	24.7031	100.092	XIAOWAN	XIAOWAN	1	HYDRO	D	3.68	.	.	.	194	37.85	156.15	0.8	C	3.76378	113300	.	2010	2008	-2	1	B	13	4	.	.	N	.	0.18	1
Effects of damming on the biological integrity of fish assemblages in the middle Lancang-Mekong River basin	Ecological Indicators	2013	JOURNAL	Jinpeng Li, Shikui Dong, Mingchun Peng, Zhifeng Yang, Shiliang Liu, Xiaoyan Li, ChenZhao	https://www.sciencedirect.com/science/article/pii/S1470160X13001799	33	LI2013	3	2	2	93	TR	Tropical_and_subtropical_upland_rivers	Upper_Lancang_(Mekong)	CHINA	24°42'11.0"N	100°05'31.0"E	24.7031	100.092	XIAOWAN	XIAOWAN	1	HYDRO	D	3.68	.	.	.	194	37.85	156.15	0.8	C	3.76378	113300	.	2010	2010	0	1	A	10	8	.	.	N	.	0.88	1
Effects of damming on the biological integrity of fish assemblages in the middle Lancang-Mekong River basin	Ecological Indicators	2013	JOURNAL	Jinpeng Li, Shikui Dong, Mingchun Peng, Zhifeng Yang, Shiliang Liu, Xiaoyan Li, ChenZhao	https://www.sciencedirect.com/science/article/pii/S1470160X13001799	33	LI2013	3	3	3	93	TR	Tropical_and_subtropical_upland_rivers	Upper_Lancang_(Mekong)	CHINA	24°42'11.0"N	100°05'31.0"E	24.7031	100.092	XIAOWAN	XIAOWAN	1	HYDRO	D	3.68	.	.	.	194	37.85	156.15	0.8	C	3.76378	113300	.	2010	2011	1	1	A	5	3	.	.	N	.	0.78	1
Effects of damming on the biological integrity of fish assemblages in the middle Lancang-Mekong River basin	Ecological Indicators	2013	JOURNAL	Jinpeng Li, Shikui Dong, Mingchun Peng, Zhifeng Yang, Shiliang Liu, Xiaoyan Li, ChenZhao	https://www.sciencedirect.com/science/article/pii/S1470160X13001799	33	LI2013	3	4	1	94	TR	Tropical_and_subtropical_upland_rivers	Upper_Lancang_(Mekong)	CHINA	24°42'11.0"N	100°05'31.0"E	24.7031	100.092	XIAOWAN	XIAOWAN	2	HYDRO	UD	0.5	.	.	.	194	37.85	156.15	0.8	C	3.76378	113300	.	2010	2008	-2	1	B	13	4	.	.	N	.	0.18	1
Effects of damming on the biological integrity of fish assemblages in the middle Lancang-Mekong River basin	Ecological Indicators	2013	JOURNAL	Jinpeng Li, Shikui Dong, Mingchun Peng, Zhifeng Yang, Shiliang Liu, Xiaoyan Li, ChenZhao	https://www.sciencedirect.com/science/article/pii/S1470160X13001799	33	LI2013	3	5	2	94	TR	Tropical_and_subtropical_upland_rivers	Upper_Lancang_(Mekong)	CHINA	24°42'11.0"N	100°05'31.0"E	24.7031	100.092	XIAOWAN	XIAOWAN	2	HYDRO	UD	0.5	.	.	.	194	37.85	156.15	0.8	C	3.76378	113300	.	2010	2010	0	1	A	10	8	.	.	N	.	0.9	1
Effects of damming on the biological integrity of fish assemblages in the middle Lancang-Mekong River basin	Ecological Indicators	2013	JOURNAL	Jinpeng Li, Shikui Dong, Mingchun Peng, Zhifeng Yang, Shiliang Liu, Xiaoyan Li, ChenZhao	https://www.sciencedirect.com/science/article/pii/S1470160X13001799	33	LI2013	3	6	3	94	TR	Tropical_and_subtropical_upland_rivers	Upper_Lancang_(Mekong)	CHINA	24°42'11.0"N	100°05'31.0"E	24.7031	100.092	XIAOWAN	XIAOWAN	2	HYDRO	UD	0.5	.	.	.	194	37.85	156.15	0.8	C	3.76378	113300	.	2010	2011	1	1	A	10	9	.	.	N	.	0.95	1
Effects of damming on the biological integrity of fish assemblages in the middle Lancang-Mekong River basin	Ecological Indicators	2013	JOURNAL	Jinpeng Li, Shikui Dong, Mingchun Peng, Zhifeng Yang, Shiliang Liu, Xiaoyan Li, ChenZhao	https://www.sciencedirect.com/science/article/pii/S1470160X13001799	33	LI2013	3	7	1	95	TR	Tropical_and_subtropical_upland_rivers	Upper_Lancang_(Mekong)	CHINA	24°42'11.0"N	100°05'31.0"E	24.7031	100.092	XIAOWAN	XIAOWAN	3	HYDRO	UD	54.75	.	.	.	194	37.85	156.15	0.8	C	3.76378	113300	.	2010	2008	-2	1	B	17	1	.	.	N	.	0.05	1
Effects of damming on the biological integrity of fish assemblages in the middle Lancang-Mekong River basin	Ecological Indicators	2013	JOURNAL	Jinpeng Li, Shikui Dong, Mingchun Peng, Zhifeng Yang, Shiliang Liu, Xiaoyan Li, ChenZhao	https://www.sciencedirect.com/science/article/pii/S1470160X13001799	33	LI2013	3	8	2	95	TR	Tropical_and_subtropical_upland_rivers	Upper_Lancang_(Mekong)	CHINA	24°42'11.0"N	100°05'31.0"E	24.7031	100.092	XIAOWAN	XIAOWAN	3	HYDRO	UD	54.75	.	.	.	194	37.85	156.15	0.8	C	3.76378	113300	.	2010	2010	0	1	A	11	6	.	.	N	.	0.92	1
Effects of damming on the biological integrity of fish assemblages in the middle Lancang-Mekong River basin	Ecological Indicators	2013	JOURNAL	Jinpeng Li, Shikui Dong, Mingchun Peng, Zhifeng Yang, Shiliang Liu, Xiaoyan Li, ChenZhao	https://www.sciencedirect.com/science/article/pii/S1470160X13001799	33	LI2013	3	9	3	95	TR	Tropical_and_subtropical_upland_rivers	Upper_Lancang_(Mekong)	CHINA	24°42'11.0"N	100°05'31.0"E	24.7031	100.092	XIAOWAN	XIAOWAN	3	HYDRO	UD	54.75	.	.	.	194	37.85	156.15	0.8	C	3.76378	113300	.	2010	2011	1	1	A	11	10	.	.	N	.	0.98	1
Effects of damming on the biological integrity of fish assemblages in the middle Lancang-Mekong River basin	Ecological Indicators	2013	JOURNAL	Jinpeng Li, Shikui Dong, Mingchun Peng, Zhifeng Yang, Shiliang Liu, Xiaoyan Li, ChenZhao	https://www.sciencedirect.com/science/article/pii/S1470160X13001799	33	LI2013	3	10	1	96	TR	Tropical_and_subtropical_upland_rivers	Upper_Lancang_(Mekong)	CHINA	24°42'11.0"N	100°05'31.0"E	24.7031	100.092	XIAOWAN	XIAOWAN	4	HYDRO	UD	66.41	.	.	.	194	37.85	156.15	0.8	C	3.76378	113300	.	2010	2008	-2	1	B	6	0	.	.	N	.	0	1
Effects of damming on the biological integrity of fish assemblages in the middle Lancang-Mekong River basin	Ecological Indicators	2013	JOURNAL	Jinpeng Li, Shikui Dong, Mingchun Peng, Zhifeng Yang, Shiliang Liu, Xiaoyan Li, ChenZhao	https://www.sciencedirect.com/science/article/pii/S1470160X13001799	33	LI2013	3	11	2	96	TR	Tropical_and_subtropical_upland_rivers	Upper_Lancang_(Mekong)	CHINA	24°42'11.0"N	100°05'31.0"E	24.7031	100.092	XIAOWAN	XIAOWAN	4	HYDRO	UD	66.41	.	.	.	194	37.85	156.15	0.8	C	3.76378	113300	.	2010	2010	0	1	A	9	6	.	.	N	.	0.97	1
Effects of damming on the biological integrity of fish assemblages in the middle Lancang-Mekong River basin	Ecological Indicators	2013	JOURNAL	Jinpeng Li, Shikui Dong, Mingchun Peng, Zhifeng Yang, Shiliang Liu, Xiaoyan Li, ChenZhao	https://www.sciencedirect.com/science/article/pii/S1470160X13001799	33	LI2013	3	12	3	96	TR	Tropical_and_subtropical_upland_rivers	Upper_Lancang_(Mekong)	CHINA	24°42'11.0"N	100°05'31.0"E	24.7031	100.092	XIAOWAN	XIAOWAN	4	HYDRO	UD	66.41	.	.	.	194	37.85	156.15	0.8	C	3.76378	113300	.	2010	2011	1	1	A	10	10	.	.	N	.	0.98	1
Large dam reservoirs are probably long‐period oscillators of fish diversity	Journal of Fish Biology	2013	JOURNAL	Ł. Głowacki, T. Penczak	https://onlinelibrary.wiley.com/doi/full/10.1111/j.1095-8649.2012.03274.x	34	G&P2013	2	1	1	97	T	Temperate_floodplain_rivers_and_wetlands	Central_and_western_Europe	POLAND	51°27'07.7"N	19°57'18.8"E	51.4521	19.9552	SULEJOWSKI	SULEJOWSKI	1	WATER_SUP	D	.	.	.	.	27.5	2.76	24.74	0.9	L	2.18092	4930	4.9	1974	1969	-5	30	B	27	2	2.92	0.886	Y	3.336	0.664	1
Large dam reservoirs are probably long‐period oscillators of fish diversity	Journal of Fish Biology	2013	JOURNAL	Ł. Głowacki, T. Penczak	https://onlinelibrary.wiley.com/doi/full/10.1111/j.1095-8649.2012.03274.x	34	G&P2013	2	2	2	97	T	Temperate_floodplain_rivers_and_wetlands	Central_and_western_Europe	POLAND	51°27'07.7"N	19°57'18.8"E	51.4521	19.9552	SULEJOWSKI	SULEJOWSKI	1	WATER_SUP	D	.	.	.	.	27.5	2.76	24.74	0.9	L	2.18092	4930	4.9	1974	2004	30	30	A	30	3	3.064	0.901	Y	3.414	0.708	1
Large dam reservoirs are probably long‐period oscillators of fish diversity	Journal of Fish Biology	2013	JOURNAL	Ł. Głowacki, T. Penczak	https://onlinelibrary.wiley.com/doi/full/10.1111/j.1095-8649.2012.03274.x	34	G&P2013	2	3	1	98	T	Temperate_floodplain_rivers_and_wetlands	Central_and_western_Europe	POLAND	51°27'07.7"N	19°57'18.8"E	51.4521	19.9552	SULEJOWSKI	SULEJOWSKI	2	WATER_SUP	UR	.	.	.	.	27.5	2.76	24.74	0.9	L	2.18092	4930	4.9	1974	1969	-5	30	B	29	2	2.922	0.868	Y	3.334	0.689	1
Large dam reservoirs are probably long‐period oscillators of fish diversity	Journal of Fish Biology	2013	JOURNAL	Ł. Głowacki, T. Penczak	https://onlinelibrary.wiley.com/doi/full/10.1111/j.1095-8649.2012.03274.x	34	G&P2013	2	4	2	98	T	Temperate_floodplain_rivers_and_wetlands	Central_and_western_Europe	POLAND	51°27'07.7"N	19°57'18.8"E	51.4521	19.9552	SULEJOWSKI	SULEJOWSKI	2	WATER_SUP	UR	.	.	.	.	27.5	2.76	24.74	0.9	L	2.18092	4930	4.9	1974	2004	30	30	A	36	6	3.155	0.88	Y	3.401	0.724	1
Patternizing of impoundment impact (1985–2002) on fish assemblages in a lowland river using the Kohonen algorithm	Journal of Applied Ichthyology	2005	JOURNAL	T. Penczak, A. Kruk	https://onlinelibrary.wiley.com/doi/abs/10.1111/j.1439-0426.2005.00649.x	35	P&K2005	18	1	1	99	T	Temperate_floodplain_rivers_and_wetlands	Central_and_western_Europe	POLAND	51°48'20.4"N	18°40'24.1"E	51.8057	18.6734	JEZIORSKO	JEZIORSKO	AB	HYDRO	UR	25.9	4	.	.	35.8	2.88	32.93	0.92	L	0.886642	9014	5.7	1986	1985	-1	16	B	18	.	2.035	0.718	Y	3.34	0.86	1
Patternizing of impoundment impact (1985–2002) on fish assemblages in a lowland river using the Kohonen algorithm	Journal of Applied Ichthyology	2005	JOURNAL	T. Penczak, A. Kruk	https://onlinelibrary.wiley.com/doi/abs/10.1111/j.1439-0426.2005.00649.x	35	P&K2005	18	2	2	99	T	Temperate_floodplain_rivers_and_wetlands	Central_and_western_Europe	POLAND	51°48'20.4"N	18°40'24.1"E	51.8057	18.6734	JEZIORSKO	JEZIORSKO	AB	HYDRO	UR	25.9	4	.	.	35.8	2.88	32.93	0.92	L	0.886642	9014	5.7	1986	1986	0	16	A	16	.	1.873	0.676	Y	3.24	0.942	1
Patternizing of impoundment impact (1985–2002) on fish assemblages in a lowland river using the Kohonen algorithm	Journal of Applied Ichthyology	2005	JOURNAL	T. Penczak, A. Kruk	https://onlinelibrary.wiley.com/doi/abs/10.1111/j.1439-0426.2005.00649.x	35	P&K2005	18	3	3	99	T	Temperate_floodplain_rivers_and_wetlands	Central_and_western_Europe	POLAND	51°48'20.4"N	18°40'24.1"E	51.8057	18.6734	JEZIORSKO	JEZIORSKO	AB	HYDRO	UR	25.9	4	.	.	35.8	2.88	32.93	0.92	L	0.886642	9014	5.7	1986	1987	1	16	A	17	.	2.075	0.748	Y	3.467	0.835	1
Patternizing of impoundment impact (1985–2002) on fish assemblages in a lowland river using the Kohonen algorithm	Journal of Applied Ichthyology	2005	JOURNAL	T. Penczak, A. Kruk	https://onlinelibrary.wiley.com/doi/abs/10.1111/j.1439-0426.2005.00649.x	35	P&K2005	18	4	4	99	T	Temperate_floodplain_rivers_and_wetlands	Central_and_western_Europe	POLAND	51°48'20.4"N	18°40'24.1"E	51.8057	18.6734	JEZIORSKO	JEZIORSKO	AB	HYDRO	UR	25.9	4	.	.	35.8	2.88	32.93	0.92	L	0.886642	9014	5.7	1986	1988	2	16	A	15	.	1.801	0.682	Y	3.463	0.852	1
Patternizing of impoundment impact (1985–2002) on fish assemblages in a lowland river using the Kohonen algorithm	Journal of Applied Ichthyology	2005	JOURNAL	T. Penczak, A. Kruk	https://onlinelibrary.wiley.com/doi/abs/10.1111/j.1439-0426.2005.00649.x	35	P&K2005	18	5	5	99	T	Temperate_floodplain_rivers_and_wetlands	Central_and_western_Europe	POLAND	51°48'20.4"N	18°40'24.1"E	51.8057	18.6734	JEZIORSKO	JEZIORSKO	AB	HYDRO	UR	25.9	4	.	.	35.8	2.88	32.93	0.92	L	0.886642	9014	5.7	1986	1989	3	16	A	19	.	2.13	0.737	Y	3.588	0.766	1
Patternizing of impoundment impact (1985–2002) on fish assemblages in a lowland river using the Kohonen algorithm	Journal of Applied Ichthyology	2005	JOURNAL	T. Penczak, A. Kruk	https://onlinelibrary.wiley.com/doi/abs/10.1111/j.1439-0426.2005.00649.x	35	P&K2005	18	6	6	99	T	Temperate_floodplain_rivers_and_wetlands	Central_and_western_Europe	POLAND	51°48'20.4"N	18°40'24.1"E	51.8057	18.6734	JEZIORSKO	JEZIORSKO	AB	HYDRO	UR	25.9	4	.	.	35.8	2.88	32.93	0.92	L	0.886642	9014	5.7	1986	1990	4	16	A	14	.	1.667	0.65	Y	3.621	0.507	1
Patternizing of impoundment impact (1985–2002) on fish assemblages in a lowland river using the Kohonen algorithm	Journal of Applied Ichthyology	2005	JOURNAL	T. Penczak, A. Kruk	https://onlinelibrary.wiley.com/doi/abs/10.1111/j.1439-0426.2005.00649.x	35	P&K2005	18	7	7	99	T	Temperate_floodplain_rivers_and_wetlands	Central_and_western_Europe	POLAND	51°48'20.4"N	18°40'24.1"E	51.8057	18.6734	JEZIORSKO	JEZIORSKO	AB	HYDRO	UR	25.9	4	.	.	35.8	2.88	32.93	0.92	L	0.886642	9014	5.7	1986	1991	5	16	A	15	.	1.907	0.704	Y	3.456	0.795	1
Patternizing of impoundment impact (1985–2002) on fish assemblages in a lowland river using the Kohonen algorithm	Journal of Applied Ichthyology	2005	JOURNAL	T. Penczak, A. Kruk	https://onlinelibrary.wiley.com/doi/abs/10.1111/j.1439-0426.2005.00649.x	35	P&K2005	18	8	8	99	T	Temperate_floodplain_rivers_and_wetlands	Central_and_western_Europe	POLAND	51°48'20.4"N	18°40'24.1"E	51.8057	18.6734	JEZIORSKO	JEZIORSKO	AB	HYDRO	UR	25.9	4	.	.	35.8	2.88	32.93	0.92	L	0.886642	9014	5.7	1986	1992	6	16	A	14	.	1.972	0.769	Y	3.551	0.869	1
Patternizing of impoundment impact (1985–2002) on fish assemblages in a lowland river using the Kohonen algorithm	Journal of Applied Ichthyology	2005	JOURNAL	T. Penczak, A. Kruk	https://onlinelibrary.wiley.com/doi/abs/10.1111/j.1439-0426.2005.00649.x	35	P&K2005	18	9	9	99	T	Temperate_floodplain_rivers_and_wetlands	Central_and_western_Europe	POLAND	51°48'20.4"N	18°40'24.1"E	51.8057	18.6734	JEZIORSKO	JEZIORSKO	AB	HYDRO	UR	25.9	4	.	.	35.8	2.88	32.93	0.92	L	0.886642	9014	5.7	1986	1993	7	16	A	17	.	2.119	0.764	Y	3.473	0.829	1
Patternizing of impoundment impact (1985–2002) on fish assemblages in a lowland river using the Kohonen algorithm	Journal of Applied Ichthyology	2005	JOURNAL	T. Penczak, A. Kruk	https://onlinelibrary.wiley.com/doi/abs/10.1111/j.1439-0426.2005.00649.x	35	P&K2005	18	10	10	99	T	Temperate_floodplain_rivers_and_wetlands	Central_and_western_Europe	POLAND	51°48'20.4"N	18°40'24.1"E	51.8057	18.6734	JEZIORSKO	JEZIORSKO	AB	HYDRO	UR	25.9	4	.	.	35.8	2.88	32.93	0.92	L	0.886642	9014	5.7	1986	1994	8	16	A	12	.	1.868	0.779	Y	3.737	0.892	1
Patternizing of impoundment impact (1985–2002) on fish assemblages in a lowland river using the Kohonen algorithm	Journal of Applied Ichthyology	2005	JOURNAL	T. Penczak, A. Kruk	https://onlinelibrary.wiley.com/doi/abs/10.1111/j.1439-0426.2005.00649.x	35	P&K2005	18	11	11	99	T	Temperate_floodplain_rivers_and_wetlands	Central_and_western_Europe	POLAND	51°48'20.4"N	18°40'24.1"E	51.8057	18.6734	JEZIORSKO	JEZIORSKO	AB	HYDRO	UR	25.9	4	.	.	35.8	2.88	32.93	0.92	L	0.886642	9014	5.7	1986	1995	9	16	A	16	.	1.96	0.707	Y	3.497	0.843	1
Patternizing of impoundment impact (1985–2002) on fish assemblages in a lowland river using the Kohonen algorithm	Journal of Applied Ichthyology	2005	JOURNAL	T. Penczak, A. Kruk	https://onlinelibrary.wiley.com/doi/abs/10.1111/j.1439-0426.2005.00649.x	35	P&K2005	18	12	12	99	T	Temperate_floodplain_rivers_and_wetlands	Central_and_western_Europe	POLAND	51°48'20.4"N	18°40'24.1"E	51.8057	18.6734	JEZIORSKO	JEZIORSKO	AB	HYDRO	UR	25.9	4	.	.	35.8	2.88	32.93	0.92	L	0.886642	9014	5.7	1986	1996	10	16	A	15	.	1.967	0.746	Y	3.425	0.736	1
Patternizing of impoundment impact (1985–2002) on fish assemblages in a lowland river using the Kohonen algorithm	Journal of Applied Ichthyology	2005	JOURNAL	T. Penczak, A. Kruk	https://onlinelibrary.wiley.com/doi/abs/10.1111/j.1439-0426.2005.00649.x	35	P&K2005	18	13	13	99	T	Temperate_floodplain_rivers_and_wetlands	Central_and_western_Europe	POLAND	51°48'20.4"N	18°40'24.1"E	51.8057	18.6734	JEZIORSKO	JEZIORSKO	AB	HYDRO	UR	25.9	4	.	.	35.8	2.88	32.93	0.92	L	0.886642	9014	5.7	1986	1997	11	16	A	13	.	1.879	0.756	Y	3.351	0.766	1
Patternizing of impoundment impact (1985–2002) on fish assemblages in a lowland river using the Kohonen algorithm	Journal of Applied Ichthyology	2005	JOURNAL	T. Penczak, A. Kruk	https://onlinelibrary.wiley.com/doi/abs/10.1111/j.1439-0426.2005.00649.x	35	P&K2005	18	14	14	99	T	Temperate_floodplain_rivers_and_wetlands	Central_and_western_Europe	POLAND	51°48'20.4"N	18°40'24.1"E	51.8057	18.6734	JEZIORSKO	JEZIORSKO	AB	HYDRO	UR	25.9	4	.	.	35.8	2.88	32.93	0.92	L	0.886642	9014	5.7	1986	1998	12	16	A	13	.	1.861	0.726	Y	3.527	0.774	1
Patternizing of impoundment impact (1985–2002) on fish assemblages in a lowland river using the Kohonen algorithm	Journal of Applied Ichthyology	2005	JOURNAL	T. Penczak, A. Kruk	https://onlinelibrary.wiley.com/doi/abs/10.1111/j.1439-0426.2005.00649.x	35	P&K2005	18	15	15	99	T	Temperate_floodplain_rivers_and_wetlands	Central_and_western_Europe	POLAND	51°48'20.4"N	18°40'24.1"E	51.8057	18.6734	JEZIORSKO	JEZIORSKO	AB	HYDRO	UR	25.9	4	.	.	35.8	2.88	32.93	0.92	L	0.886642	9014	5.7	1986	1999	13	16	A	10	.	1.609	0.699	Y	3.577	0.821	1
Patternizing of impoundment impact (1985–2002) on fish assemblages in a lowland river using the Kohonen algorithm	Journal of Applied Ichthyology	2005	JOURNAL	T. Penczak, A. Kruk	https://onlinelibrary.wiley.com/doi/abs/10.1111/j.1439-0426.2005.00649.x	35	P&K2005	18	16	16	99	T	Temperate_floodplain_rivers_and_wetlands	Central_and_western_Europe	POLAND	51°48'20.4"N	18°40'24.1"E	51.8057	18.6734	JEZIORSKO	JEZIORSKO	AB	HYDRO	UR	25.9	4	.	.	35.8	2.88	32.93	0.92	L	0.886642	9014	5.7	1986	2000	14	16	A	13	.	1.721	0.671	Y	3.614	0.801	1
Patternizing of impoundment impact (1985–2002) on fish assemblages in a lowland river using the Kohonen algorithm	Journal of Applied Ichthyology	2005	JOURNAL	T. Penczak, A. Kruk	https://onlinelibrary.wiley.com/doi/abs/10.1111/j.1439-0426.2005.00649.x	35	P&K2005	18	17	17	99	T	Temperate_floodplain_rivers_and_wetlands	Central_and_western_Europe	POLAND	51°48'20.4"N	18°40'24.1"E	51.8057	18.6734	JEZIORSKO	JEZIORSKO	AB	HYDRO	UR	25.9	4	.	.	35.8	2.88	32.93	0.92	L	0.886642	9014	5.7	1986	2001	15	16	A	10	.	0.757	0.344	Y	3.889	0.935	1
Patternizing of impoundment impact (1985–2002) on fish assemblages in a lowland river using the Kohonen algorithm	Journal of Applied Ichthyology	2005	JOURNAL	T. Penczak, A. Kruk	https://onlinelibrary.wiley.com/doi/abs/10.1111/j.1439-0426.2005.00649.x	35	P&K2005	18	18	18	99	T	Temperate_floodplain_rivers_and_wetlands	Central_and_western_Europe	POLAND	51°48'20.4"N	18°40'24.1"E	51.8057	18.6734	JEZIORSKO	JEZIORSKO	AB	HYDRO	UR	25.9	4	.	.	35.8	2.88	32.93	0.92	L	0.886642	9014	5.7	1986	2002	16	16	A	10	.	1.302	0.565	Y	3.843	0.669	1
Patternizing of impoundment impact (1985–2002) on fish assemblages in a lowland river using the Kohonen algorithm	Journal of Applied Ichthyology	2005	JOURNAL	T. Penczak, A. Kruk	https://onlinelibrary.wiley.com/doi/abs/10.1111/j.1439-0426.2005.00649.x	35	P&K2005	18	19	1	100	T	Temperate_floodplain_rivers_and_wetlands	Central_and_western_Europe	POLAND	51°48'20.4"N	18°40'24.1"E	51.8057	18.6734	JEZIORSKO	JEZIORSKO	CD	HYDRO	D	2.3	4	.	.	35.8	2.88	32.93	0.92	L	0.886642	9014	5.7	1986	1985	-1	16	B	22	.	2.049	0.663	Y	3.534	0.888	1
Patternizing of impoundment impact (1985–2002) on fish assemblages in a lowland river using the Kohonen algorithm	Journal of Applied Ichthyology	2005	JOURNAL	T. Penczak, A. Kruk	https://onlinelibrary.wiley.com/doi/abs/10.1111/j.1439-0426.2005.00649.x	35	P&K2005	18	20	2	100	T	Temperate_floodplain_rivers_and_wetlands	Central_and_western_Europe	POLAND	51°48'20.4"N	18°40'24.1"E	51.8057	18.6734	JEZIORSKO	JEZIORSKO	CD	HYDRO	D	2.3	4	.	.	35.8	2.88	32.93	0.92	L	0.886642	9014	5.7	1986	1986	0	16	A	20	.	2.066	0.69	Y	3.433	0.854	1
Patternizing of impoundment impact (1985–2002) on fish assemblages in a lowland river using the Kohonen algorithm	Journal of Applied Ichthyology	2005	JOURNAL	T. Penczak, A. Kruk	https://onlinelibrary.wiley.com/doi/abs/10.1111/j.1439-0426.2005.00649.x	35	P&K2005	18	21	3	100	T	Temperate_floodplain_rivers_and_wetlands	Central_and_western_Europe	POLAND	51°48'20.4"N	18°40'24.1"E	51.8057	18.6734	JEZIORSKO	JEZIORSKO	CD	HYDRO	D	2.3	4	.	.	35.8	2.88	32.93	0.92	L	0.886642	9014	5.7	1986	1987	1	16	A	19	.	1.722	0.585	Y	3.35	0.942	1
Patternizing of impoundment impact (1985–2002) on fish assemblages in a lowland river using the Kohonen algorithm	Journal of Applied Ichthyology	2005	JOURNAL	T. Penczak, A. Kruk	https://onlinelibrary.wiley.com/doi/abs/10.1111/j.1439-0426.2005.00649.x	35	P&K2005	18	22	4	100	T	Temperate_floodplain_rivers_and_wetlands	Central_and_western_Europe	POLAND	51°48'20.4"N	18°40'24.1"E	51.8057	18.6734	JEZIORSKO	JEZIORSKO	CD	HYDRO	D	2.3	4	.	.	35.8	2.88	32.93	0.92	L	0.886642	9014	5.7	1986	1988	2	16	A	19	.	1.889	0.642	Y	3.556	0.936	1
Patternizing of impoundment impact (1985–2002) on fish assemblages in a lowland river using the Kohonen algorithm	Journal of Applied Ichthyology	2005	JOURNAL	T. Penczak, A. Kruk	https://onlinelibrary.wiley.com/doi/abs/10.1111/j.1439-0426.2005.00649.x	35	P&K2005	18	23	5	100	T	Temperate_floodplain_rivers_and_wetlands	Central_and_western_Europe	POLAND	51°48'20.4"N	18°40'24.1"E	51.8057	18.6734	JEZIORSKO	JEZIORSKO	CD	HYDRO	D	2.3	4	.	.	35.8	2.88	32.93	0.92	L	0.886642	9014	5.7	1986	1989	3	16	A	24	.	2.12	0.667	Y	3.486	0.965	1
Patternizing of impoundment impact (1985–2002) on fish assemblages in a lowland river using the Kohonen algorithm	Journal of Applied Ichthyology	2005	JOURNAL	T. Penczak, A. Kruk	https://onlinelibrary.wiley.com/doi/abs/10.1111/j.1439-0426.2005.00649.x	35	P&K2005	18	24	6	100	T	Temperate_floodplain_rivers_and_wetlands	Central_and_western_Europe	POLAND	51°48'20.4"N	18°40'24.1"E	51.8057	18.6734	JEZIORSKO	JEZIORSKO	CD	HYDRO	D	2.3	4	.	.	35.8	2.88	32.93	0.92	L	0.886642	9014	5.7	1986	1990	4	16	A	15	.	1.248	0.461	Y	3.241	0.997	1
Patternizing of impoundment impact (1985–2002) on fish assemblages in a lowland river using the Kohonen algorithm	Journal of Applied Ichthyology	2005	JOURNAL	T. Penczak, A. Kruk	https://onlinelibrary.wiley.com/doi/abs/10.1111/j.1439-0426.2005.00649.x	35	P&K2005	18	25	7	100	T	Temperate_floodplain_rivers_and_wetlands	Central_and_western_Europe	POLAND	51°48'20.4"N	18°40'24.1"E	51.8057	18.6734	JEZIORSKO	JEZIORSKO	CD	HYDRO	D	2.3	4	.	.	35.8	2.88	32.93	0.92	L	0.886642	9014	5.7	1986	1991	5	16	A	15	.	1.789	0.661	Y	3.692	0.985	1
Patternizing of impoundment impact (1985–2002) on fish assemblages in a lowland river using the Kohonen algorithm	Journal of Applied Ichthyology	2005	JOURNAL	T. Penczak, A. Kruk	https://onlinelibrary.wiley.com/doi/abs/10.1111/j.1439-0426.2005.00649.x	35	P&K2005	18	26	8	100	T	Temperate_floodplain_rivers_and_wetlands	Central_and_western_Europe	POLAND	51°48'20.4"N	18°40'24.1"E	51.8057	18.6734	JEZIORSKO	JEZIORSKO	CD	HYDRO	D	2.3	4	.	.	35.8	2.88	32.93	0.92	L	0.886642	9014	5.7	1986	1992	6	16	A	17	.	1.508	0.532	Y	3.629	0.996	1
Patternizing of impoundment impact (1985–2002) on fish assemblages in a lowland river using the Kohonen algorithm	Journal of Applied Ichthyology	2005	JOURNAL	T. Penczak, A. Kruk	https://onlinelibrary.wiley.com/doi/abs/10.1111/j.1439-0426.2005.00649.x	35	P&K2005	18	27	9	100	T	Temperate_floodplain_rivers_and_wetlands	Central_and_western_Europe	POLAND	51°48'20.4"N	18°40'24.1"E	51.8057	18.6734	JEZIORSKO	JEZIORSKO	CD	HYDRO	D	2.3	4	.	.	35.8	2.88	32.93	0.92	L	0.886642	9014	5.7	1986	1993	7	16	A	15	.	1.478	0.546	Y	3.455	0.998	1
Patternizing of impoundment impact (1985–2002) on fish assemblages in a lowland river using the Kohonen algorithm	Journal of Applied Ichthyology	2005	JOURNAL	T. Penczak, A. Kruk	https://onlinelibrary.wiley.com/doi/abs/10.1111/j.1439-0426.2005.00649.x	35	P&K2005	18	28	10	100	T	Temperate_floodplain_rivers_and_wetlands	Central_and_western_Europe	POLAND	51°48'20.4"N	18°40'24.1"E	51.8057	18.6734	JEZIORSKO	JEZIORSKO	CD	HYDRO	D	2.3	4	.	.	35.8	2.88	32.93	0.92	L	0.886642	9014	5.7	1986	1994	8	16	A	16	.	1.954	0.705	Y	3.541	0.958	1
Patternizing of impoundment impact (1985–2002) on fish assemblages in a lowland river using the Kohonen algorithm	Journal of Applied Ichthyology	2005	JOURNAL	T. Penczak, A. Kruk	https://onlinelibrary.wiley.com/doi/abs/10.1111/j.1439-0426.2005.00649.x	35	P&K2005	18	29	11	100	T	Temperate_floodplain_rivers_and_wetlands	Central_and_western_Europe	POLAND	51°48'20.4"N	18°40'24.1"E	51.8057	18.6734	JEZIORSKO	JEZIORSKO	CD	HYDRO	D	2.3	4	.	.	35.8	2.88	32.93	0.92	L	0.886642	9014	5.7	1986	1995	9	16	A	12	.	1.066	0.429	Y	3.515	0.995	1
Patternizing of impoundment impact (1985–2002) on fish assemblages in a lowland river using the Kohonen algorithm	Journal of Applied Ichthyology	2005	JOURNAL	T. Penczak, A. Kruk	https://onlinelibrary.wiley.com/doi/abs/10.1111/j.1439-0426.2005.00649.x	35	P&K2005	18	30	12	100	T	Temperate_floodplain_rivers_and_wetlands	Central_and_western_Europe	POLAND	51°48'20.4"N	18°40'24.1"E	51.8057	18.6734	JEZIORSKO	JEZIORSKO	CD	HYDRO	D	2.3	4	.	.	35.8	2.88	32.93	0.92	L	0.886642	9014	5.7	1986	1996	10	16	A	13	.	1.064	0.415	Y	3.597	0.999	1
Patternizing of impoundment impact (1985–2002) on fish assemblages in a lowland river using the Kohonen algorithm	Journal of Applied Ichthyology	2005	JOURNAL	T. Penczak, A. Kruk	https://onlinelibrary.wiley.com/doi/abs/10.1111/j.1439-0426.2005.00649.x	35	P&K2005	18	31	13	100	T	Temperate_floodplain_rivers_and_wetlands	Central_and_western_Europe	POLAND	51°48'20.4"N	18°40'24.1"E	51.8057	18.6734	JEZIORSKO	JEZIORSKO	CD	HYDRO	D	2.3	4	.	.	35.8	2.88	32.93	0.92	L	0.886642	9014	5.7	1986	1997	11	16	A	21	.	1.151	0.378	Y	3.994	0.999	1
Patternizing of impoundment impact (1985–2002) on fish assemblages in a lowland river using the Kohonen algorithm	Journal of Applied Ichthyology	2005	JOURNAL	T. Penczak, A. Kruk	https://onlinelibrary.wiley.com/doi/abs/10.1111/j.1439-0426.2005.00649.x	35	P&K2005	18	32	14	100	T	Temperate_floodplain_rivers_and_wetlands	Central_and_western_Europe	POLAND	51°48'20.4"N	18°40'24.1"E	51.8057	18.6734	JEZIORSKO	JEZIORSKO	CD	HYDRO	D	2.3	4	.	.	35.8	2.88	32.93	0.92	L	0.886642	9014	5.7	1986	1998	12	16	A	18	.	1.317	0.456	Y	3.957	0.998	1
Patternizing of impoundment impact (1985–2002) on fish assemblages in a lowland river using the Kohonen algorithm	Journal of Applied Ichthyology	2005	JOURNAL	T. Penczak, A. Kruk	https://onlinelibrary.wiley.com/doi/abs/10.1111/j.1439-0426.2005.00649.x	35	P&K2005	18	33	15	100	T	Temperate_floodplain_rivers_and_wetlands	Central_and_western_Europe	POLAND	51°48'20.4"N	18°40'24.1"E	51.8057	18.6734	JEZIORSKO	JEZIORSKO	CD	HYDRO	D	2.3	4	.	.	35.8	2.88	32.93	0.92	L	0.886642	9014	5.7	1986	1999	13	16	A	14	.	1.255	0.476	Y	3.987	0.985	1
Patternizing of impoundment impact (1985–2002) on fish assemblages in a lowland river using the Kohonen algorithm	Journal of Applied Ichthyology	2005	JOURNAL	T. Penczak, A. Kruk	https://onlinelibrary.wiley.com/doi/abs/10.1111/j.1439-0426.2005.00649.x	35	P&K2005	18	34	16	100	T	Temperate_floodplain_rivers_and_wetlands	Central_and_western_Europe	POLAND	51°48'20.4"N	18°40'24.1"E	51.8057	18.6734	JEZIORSKO	JEZIORSKO	CD	HYDRO	D	2.3	4	.	.	35.8	2.88	32.93	0.92	L	0.886642	9014	5.7	1986	2000	14	16	A	19	.	1.298	0.441	Y	4.006	0.981	1
Patternizing of impoundment impact (1985–2002) on fish assemblages in a lowland river using the Kohonen algorithm	Journal of Applied Ichthyology	2005	JOURNAL	T. Penczak, A. Kruk	https://onlinelibrary.wiley.com/doi/abs/10.1111/j.1439-0426.2005.00649.x	35	P&K2005	18	35	17	100	T	Temperate_floodplain_rivers_and_wetlands	Central_and_western_Europe	POLAND	51°48'20.4"N	18°40'24.1"E	51.8057	18.6734	JEZIORSKO	JEZIORSKO	CD	HYDRO	D	2.3	4	.	.	35.8	2.88	32.93	0.92	L	0.886642	9014	5.7	1986	2001	15	16	A	13	.	1.303	0.508	Y	3.865	0.924	1
Patternizing of impoundment impact (1985–2002) on fish assemblages in a lowland river using the Kohonen algorithm	Journal of Applied Ichthyology	2005	JOURNAL	T. Penczak, A. Kruk	https://onlinelibrary.wiley.com/doi/abs/10.1111/j.1439-0426.2005.00649.x	35	P&K2005	18	36	18	100	T	Temperate_floodplain_rivers_and_wetlands	Central_and_western_Europe	POLAND	51°48'20.4"N	18°40'24.1"E	51.8057	18.6734	JEZIORSKO	JEZIORSKO	CD	HYDRO	D	2.3	4	.	.	35.8	2.88	32.93	0.92	L	0.886642	9014	5.7	1986	2002	16	16	A	17	.	1.404	0.507	Y	3.849	0.94	1
Itaipu Reservoir (Brazil) : Impacts of the Impoundment on the Fish Fauna and Fisheries	Rehabilitation of Freshwater Fisheries by I.G. Cowx	1994	BOOK	A.A. Agostnho, H.F. Julio Jr. and M. Petrere, Jr.	ftp://ftp.nupelia.uem.br/users/agostinhoaa/publications/031-COWX-Agostinho-etal.pdf	36	AGOS1994	6	1	1	101	TR	Tropical_and_subtropical_upland_rivers	Upper_Parana	BRAZIL	25°24'29.0"S	54°35'20.0"W	-25.4081	-54.5889	ITAIPU	ITAIPU	.	HYDRO	UD	.	0.1	.	.	1350	77.19	1272.81	0.94	D	1.78996	2800000	25.1	1982	1978	-4	5	B	50	.	.	.	N	.	.	0
Itaipu Reservoir (Brazil) : Impacts of the Impoundment on the Fish Fauna and Fisheries	Rehabilitation of Freshwater Fisheries by I.G. Cowx	1994	BOOK	A.A. Agostnho, H.F. Julio Jr. and M. Petrere, Jr.	ftp://ftp.nupelia.uem.br/users/agostinhoaa/publications/031-COWX-Agostinho-etal.pdf	36	AGOS1994	6	2	2	101	TR	Tropical_and_subtropical_upland_rivers	Upper_Parana	BRAZIL	25°24'29.0"S	54°35'20.0"W	-25.4081	-54.5889	ITAIPU	ITAIPU	.	HYDRO	UD	.	0.1	.	.	1351	78.19	1272.81	0.94	D	1.78996	2800000	25.1	1982	1983	1	5	A	63	.	.	.	N	.	.	0
Itaipu Reservoir (Brazil) : Impacts of the Impoundment on the Fish Fauna and Fisheries	Rehabilitation of Freshwater Fisheries by I.G. Cowx	1994	BOOK	A.A. Agostnho, H.F. Julio Jr. and M. Petrere, Jr.	ftp://ftp.nupelia.uem.br/users/agostinhoaa/publications/031-COWX-Agostinho-etal.pdf	36	AGOS1994	6	3	3	101	TR	Tropical_and_subtropical_upland_rivers	Upper_Parana	BRAZIL	25°24'29.0"S	54°35'20.0"W	-25.4081	-54.5889	ITAIPU	ITAIPU	.	HYDRO	UD	.	0.1	.	.	1352	79.19	1272.81	0.94	D	1.78996	2800000	25.1	1982	1984	2	5	A	59	.	.	.	N	.	.	0
Itaipu Reservoir (Brazil) : Impacts of the Impoundment on the Fish Fauna and Fisheries	Rehabilitation of Freshwater Fisheries by I.G. Cowx	1994	BOOK	A.A. Agostnho, H.F. Julio Jr. and M. Petrere, Jr.	ftp://ftp.nupelia.uem.br/users/agostinhoaa/publications/031-COWX-Agostinho-etal.pdf	36	AGOS1994	6	4	4	101	TR	Tropical_and_subtropical_upland_rivers	Upper_Parana	BRAZIL	25°24'29.0"S	54°35'20.0"W	-25.4081	-54.5889	ITAIPU	ITAIPU	.	HYDRO	UD	.	0.1	.	.	1353	80.19	1272.81	0.94	D	1.78996	2800000	25.1	1982	1985	3	5	A	64	.	.	.	N	.	.	0
Itaipu Reservoir (Brazil) : Impacts of the Impoundment on the Fish Fauna and Fisheries	Rehabilitation of Freshwater Fisheries by I.G. Cowx	1994	BOOK	A.A. Agostnho, H.F. Julio Jr. and M. Petrere, Jr.	ftp://ftp.nupelia.uem.br/users/agostinhoaa/publications/031-COWX-Agostinho-etal.pdf	36	AGOS1994	6	5	5	101	TR	Tropical_and_subtropical_upland_rivers	Upper_Parana	BRAZIL	25°24'29.0"S	54°35'20.0"W	-25.4081	-54.5889	ITAIPU	ITAIPU	.	HYDRO	UD	.	0.1	.	.	1354	81.19	1272.81	0.94	D	1.78996	2800000	25.1	1982	1986	4	5	A	65	.	.	.	N	.	.	0
Itaipu Reservoir (Brazil) : Impacts of the Impoundment on the Fish Fauna and Fisheries	Rehabilitation of Freshwater Fisheries by I.G. Cowx	1994	BOOK	A.A. Agostnho, H.F. Julio Jr. and M. Petrere, Jr.	ftp://ftp.nupelia.uem.br/users/agostinhoaa/publications/031-COWX-Agostinho-etal.pdf	36	AGOS1994	6	6	6	101	TR	Tropical_and_subtropical_upland_rivers	Upper_Parana	BRAZIL	25°24'29.0"S	54°35'20.0"W	-25.4081	-54.5889	ITAIPU	ITAIPU	.	HYDRO	UD	.	0.1	.	.	1355	82.19	1272.81	0.94	D	1.78996	2800000	25.1	1982	1987	5	5	A	57	.	.	.	N	.	.	0
Boreal river impoundments caused nearshore fish community assemblage shifts but little change in diversity: A multi-scale analysis	Canadian Journal of Fisheries and Aquatic Sciences	2018	JOURNAL	K. Turgeon, C. Turpin, I. Gregory-Eaves	https://doi.org/10.1139/cjfas-2017-0561	37	TURG2018	10	1	1	102	B	Temperate_coastal_rivers	Eastern_Hudson_Baie-Ungava	CANADA	53°44'13.4"N	76°55'27.9"W	53.7371	-76.9244	ROBERT-BOURASSA	LG2	RB-G2400	HYDRO	UD	0.25	1	3.3	.	2835	560.5	4048.5	0.88	L	1.3331	97643	21.8	1979	1979	0	21	F	9.96667	0	1.558	0.968	Y	3.179	1	0
Boreal river impoundments caused nearshore fish community assemblage shifts but little change in diversity: A multi-scale analysis	Canadian Journal of Fisheries and Aquatic Sciences	2018	JOURNAL	K. Turgeon, C. Turpin, I. Gregory-Eaves	https://doi.org/10.1139/cjfas-2017-0562	37	TURG2018	10	2	2	102	B	Temperate_coastal_rivers	Eastern_Hudson_Baie-Ungava	CANADA	53°44'13.4"N	76°55'27.9"W	53.7371	-76.9244	ROBERT-BOURASSA	LG2	RB-G2400	HYDRO	UD	0.25	1	3.3	.	2835	560.5	4048.5	0.88	L	1.3331	97643	21.8	1979	1980	1	21	F	7.83333	0	0.784	0.566	Y	3.227	0.97	0
Boreal river impoundments caused nearshore fish community assemblage shifts but little change in diversity: A multi-scale analysis	Canadian Journal of Fisheries and Aquatic Sciences	2018	JOURNAL	K. Turgeon, C. Turpin, I. Gregory-Eaves	https://doi.org/10.1139/cjfas-2017-0563	37	TURG2018	10	3	3	102	B	Temperate_coastal_rivers	Eastern_Hudson_Baie-Ungava	CANADA	53°44'13.4"N	76°55'27.9"W	53.7371	-76.9244	ROBERT-BOURASSA	LG2	RB-G2400	HYDRO	UD	0.25	1	3.3	.	2835	560.5	4048.5	0.88	L	1.3331	97643	21.8	1979	1981	2	21	A	7.96667	0	1.634	0.912	Y	3.513	0.974	0
Boreal river impoundments caused nearshore fish community assemblage shifts but little change in diversity: A multi-scale analysis	Canadian Journal of Fisheries and Aquatic Sciences	2018	JOURNAL	K. Turgeon, C. Turpin, I. Gregory-Eaves	https://doi.org/10.1139/cjfas-2017-0564	37	TURG2018	10	4	4	102	B	Temperate_coastal_rivers	Eastern_Hudson_Baie-Ungava	CANADA	53°44'13.4"N	76°55'27.9"W	53.7371	-76.9244	ROBERT-BOURASSA	LG2	RB-G2400	HYDRO	UD	0.25	1	3.3	.	2835	560.5	4048.5	0.88	L	1.3331	97643	21.8	1979	1982	3	21	A	11.25	0	1.455	0.748	Y	3.215	0.973	0
Boreal river impoundments caused nearshore fish community assemblage shifts but little change in diversity: A multi-scale analysis	Canadian Journal of Fisheries and Aquatic Sciences	2018	JOURNAL	K. Turgeon, C. Turpin, I. Gregory-Eaves	https://doi.org/10.1139/cjfas-2017-0565	37	TURG2018	10	5	5	102	B	Temperate_coastal_rivers	Eastern_Hudson_Baie-Ungava	CANADA	53°44'13.4"N	76°55'27.9"W	53.7371	-76.9244	ROBERT-BOURASSA	LG2	RB-G2400	HYDRO	UD	0.25	1	3.3	.	2835	560.5	4048.5	0.88	L	1.3331	97643	21.8	1979	1983	4	21	A	6.9	0	1.541	0.86	Y	3.644	0.984	0
Boreal river impoundments caused nearshore fish community assemblage shifts but little change in diversity: A multi-scale analysis	Canadian Journal of Fisheries and Aquatic Sciences	2018	JOURNAL	K. Turgeon, C. Turpin, I. Gregory-Eaves	https://doi.org/10.1139/cjfas-2017-0566	37	TURG2018	10	6	6	102	B	Temperate_coastal_rivers	Eastern_Hudson_Baie-Ungava	CANADA	53°44'13.4"N	76°55'27.9"W	53.7371	-76.9244	ROBERT-BOURASSA	LG2	RB-G2400	HYDRO	UD	0.25	1	3.3	.	2835	560.5	4048.5	0.88	L	1.3331	97643	21.8	1979	1984	5	21	A	5.07143	0	1.505	0.84	Y	3.72	1	0
Boreal river impoundments caused nearshore fish community assemblage shifts but little change in diversity: A multi-scale analysis	Canadian Journal of Fisheries and Aquatic Sciences	2018	JOURNAL	K. Turgeon, C. Turpin, I. Gregory-Eaves	https://doi.org/10.1139/cjfas-2017-0567	37	TURG2018	10	7	7	102	B	Temperate_coastal_rivers	Eastern_Hudson_Baie-Ungava	CANADA	53°44'13.4"N	76°55'27.9"W	53.7371	-76.9244	ROBERT-BOURASSA	LG2	RB-G2400	HYDRO	UD	0.25	1	3.3	.	2835	560.5	4048.5	0.88	L	1.3331	97643	21.8	1979	1988	9	21	A	6.5	0	1.047	0.756	Y	3.834	1	0
Boreal river impoundments caused nearshore fish community assemblage shifts but little change in diversity: A multi-scale analysis	Canadian Journal of Fisheries and Aquatic Sciences	2018	JOURNAL	K. Turgeon, C. Turpin, I. Gregory-Eaves	https://doi.org/10.1139/cjfas-2017-0568	37	TURG2018	10	8	8	102	B	Temperate_coastal_rivers	Eastern_Hudson_Baie-Ungava	CANADA	53°44'13.4"N	76°55'27.9"W	53.7371	-76.9244	ROBERT-BOURASSA	LG2	RB-G2400	HYDRO	UD	0.25	1	3.3	.	2835	560.5	4048.5	0.88	L	1.3331	97643	21.8	1979	1992	13	21	A	5.96667	0	1.33	0.959	Y	3.805	1	0
Boreal river impoundments caused nearshore fish community assemblage shifts but little change in diversity: A multi-scale analysis	Canadian Journal of Fisheries and Aquatic Sciences	2018	JOURNAL	K. Turgeon, C. Turpin, I. Gregory-Eaves	https://doi.org/10.1139/cjfas-2017-0569	37	TURG2018	10	9	9	102	B	Temperate_coastal_rivers	Eastern_Hudson_Baie-Ungava	CANADA	53°44'13.4"N	76°55'27.9"W	53.7371	-76.9244	ROBERT-BOURASSA	LG2	RB-G2400	HYDRO	UD	0.25	1	3.3	.	2835	560.5	4048.5	0.88	L	1.3331	97643	21.8	1979	1996	17	21	A	10.5	0	1.329	0.742	Y	3.728	1	0
Boreal river impoundments caused nearshore fish community assemblage shifts but little change in diversity: A multi-scale analysis	Canadian Journal of Fisheries and Aquatic Sciences	2018	JOURNAL	K. Turgeon, C. Turpin, I. Gregory-Eaves	https://doi.org/10.1139/cjfas-2017-0570	37	TURG2018	10	10	10	102	B	Temperate_coastal_rivers	Eastern_Hudson_Baie-Ungava	CANADA	53°44'13.4"N	76°55'27.9"W	53.7371	-76.9244	ROBERT-BOURASSA	LG2	RB-G2400	HYDRO	UD	0.25	1	3.3	.	2835	560.5	4048.5	0.88	L	1.3331	97643	21.8	1979	2000	21	21	A	6.99242	0	1.193	0.741	Y	3.77	1	0
Boreal river impoundments caused nearshore fish community assemblage shifts but little change in diversity: A multi-scale analysis	Canadian Journal of Fisheries and Aquatic Sciences	2018	JOURNAL	K. Turgeon, C. Turpin, I. Gregory-Eaves	https://doi.org/10.1139/cjfas-2017-0571	37	TURG2018	10	11	1	103	B	Temperate_coastal_rivers	Eastern_Hudson_Baie-Ungava	CANADA	53°44'13.4"N	76°55'27.9"W	53.7371	-76.9244	ROBERT-BOURASSA	LG2	RB-G2405	HYDRO	UD	78	1	3.3	.	2835	560.5	4048.5	0.88	L	1.3331	97643	21.8	1979	1978	-1	21	B	8.24242	0	1.831	0.881	Y	3.445	0.782	0
Boreal river impoundments caused nearshore fish community assemblage shifts but little change in diversity: A multi-scale analysis	Canadian Journal of Fisheries and Aquatic Sciences	2018	JOURNAL	K. Turgeon, C. Turpin, I. Gregory-Eaves	https://doi.org/10.1139/cjfas-2017-0572	37	TURG2018	10	12	2	103	B	Temperate_coastal_rivers	Eastern_Hudson_Baie-Ungava	CANADA	53°44'13.4"N	76°55'27.9"W	53.7371	-76.9244	ROBERT-BOURASSA	LG2	RB-G2405	HYDRO	UD	78	1	3.3	.	2835	560.5	4048.5	0.88	L	1.3331	97643	21.8	1979	1979	0	21	F	8.48485	0	1.917	0.872	Y	3.515	0.718	0
Boreal river impoundments caused nearshore fish community assemblage shifts but little change in diversity: A multi-scale analysis	Canadian Journal of Fisheries and Aquatic Sciences	2018	JOURNAL	K. Turgeon, C. Turpin, I. Gregory-Eaves	https://doi.org/10.1139/cjfas-2017-0573	37	TURG2018	10	13	3	103	B	Temperate_coastal_rivers	Eastern_Hudson_Baie-Ungava	CANADA	53°44'13.4"N	76°55'27.9"W	53.7371	-76.9244	ROBERT-BOURASSA	LG2	RB-G2405	HYDRO	UD	78	1	3.3	.	2835	560.5	4048.5	0.88	L	1.3331	97643	21.8	1979	1980	1	21	A	7.9	0	1.003	0.623	Y	3.332	0.93	0
Boreal river impoundments caused nearshore fish community assemblage shifts but little change in diversity: A multi-scale analysis	Canadian Journal of Fisheries and Aquatic Sciences	2018	JOURNAL	K. Turgeon, C. Turpin, I. Gregory-Eaves	https://doi.org/10.1139/cjfas-2017-0574	37	TURG2018	10	14	4	103	B	Temperate_coastal_rivers	Eastern_Hudson_Baie-Ungava	CANADA	53°44'13.4"N	76°55'27.9"W	53.7371	-76.9244	ROBERT-BOURASSA	LG2	RB-G2405	HYDRO	UD	78	1	3.3	.	2835	560.5	4048.5	0.88	L	1.3331	97643	21.8	1979	1981	2	21	A	9.57143	0	1.24	0.637	Y	3.353	0.941	0
Boreal river impoundments caused nearshore fish community assemblage shifts but little change in diversity: A multi-scale analysis	Canadian Journal of Fisheries and Aquatic Sciences	2018	JOURNAL	K. Turgeon, C. Turpin, I. Gregory-Eaves	https://doi.org/10.1139/cjfas-2017-0575	37	TURG2018	10	15	5	103	B	Temperate_coastal_rivers	Eastern_Hudson_Baie-Ungava	CANADA	53°44'13.4"N	76°55'27.9"W	53.7371	-76.9244	ROBERT-BOURASSA	LG2	RB-G2405	HYDRO	UD	78	1	3.3	.	2835	560.5	4048.5	0.88	L	1.3331	97643	21.8	1979	1982	3	21	A	10.75	0	1.727	0.83	Y	3.469	0.871	0
Boreal river impoundments caused nearshore fish community assemblage shifts but little change in diversity: A multi-scale analysis	Canadian Journal of Fisheries and Aquatic Sciences	2018	JOURNAL	K. Turgeon, C. Turpin, I. Gregory-Eaves	https://doi.org/10.1139/cjfas-2017-0576	37	TURG2018	10	16	6	103	B	Temperate_coastal_rivers	Eastern_Hudson_Baie-Ungava	CANADA	53°44'13.4"N	76°55'27.9"W	53.7371	-76.9244	ROBERT-BOURASSA	LG2	RB-G2405	HYDRO	UD	78	1	3.3	.	2835	560.5	4048.5	0.88	L	1.3331	97643	21.8	1979	1983	4	21	A	7.96667	0	1.101	0.615	Y	3.594	0.996	0
Boreal river impoundments caused nearshore fish community assemblage shifts but little change in diversity: A multi-scale analysis	Canadian Journal of Fisheries and Aquatic Sciences	2018	JOURNAL	K. Turgeon, C. Turpin, I. Gregory-Eaves	https://doi.org/10.1139/cjfas-2017-0577	37	TURG2018	10	17	7	103	B	Temperate_coastal_rivers	Eastern_Hudson_Baie-Ungava	CANADA	53°44'13.4"N	76°55'27.9"W	53.7371	-76.9244	ROBERT-BOURASSA	LG2	RB-G2405	HYDRO	UD	78	1	3.3	.	2835	560.5	4048.5	0.88	L	1.3331	97643	21.8	1979	1984	5	21	A	8	0	1.394	0.717	Y	3.627	0.98	0
Boreal river impoundments caused nearshore fish community assemblage shifts but little change in diversity: A multi-scale analysis	Canadian Journal of Fisheries and Aquatic Sciences	2018	JOURNAL	K. Turgeon, C. Turpin, I. Gregory-Eaves	https://doi.org/10.1139/cjfas-2017-0578	37	TURG2018	10	18	8	103	B	Temperate_coastal_rivers	Eastern_Hudson_Baie-Ungava	CANADA	53°44'13.4"N	76°55'27.9"W	53.7371	-76.9244	ROBERT-BOURASSA	LG2	RB-G2405	HYDRO	UD	78	1	3.3	.	2835	560.5	4048.5	0.88	L	1.3331	97643	21.8	1979	1988	9	21	A	11	0	1.315	0.676	Y	3.635	1	0
Boreal river impoundments caused nearshore fish community assemblage shifts but little change in diversity: A multi-scale analysis	Canadian Journal of Fisheries and Aquatic Sciences	2018	JOURNAL	K. Turgeon, C. Turpin, I. Gregory-Eaves	https://doi.org/10.1139/cjfas-2017-0579	37	TURG2018	10	19	9	103	B	Temperate_coastal_rivers	Eastern_Hudson_Baie-Ungava	CANADA	53°44'13.4"N	76°55'27.9"W	53.7371	-76.9244	ROBERT-BOURASSA	LG2	RB-G2405	HYDRO	UD	78	1	3.3	.	2835	560.5	4048.5	0.88	L	1.3331	97643	21.8	1979	1992	13	21	A	5.46667	0	1.419	0.881	Y	3.572	1	0
Boreal river impoundments caused nearshore fish community assemblage shifts but little change in diversity: A multi-scale analysis	Canadian Journal of Fisheries and Aquatic Sciences	2018	JOURNAL	K. Turgeon, C. Turpin, I. Gregory-Eaves	https://doi.org/10.1139/cjfas-2017-0580	37	TURG2018	10	20	10	103	B	Temperate_coastal_rivers	Eastern_Hudson_Baie-Ungava	CANADA	53°44'13.4"N	76°55'27.9"W	53.7371	-76.9244	ROBERT-BOURASSA	LG2	RB-G2405	HYDRO	UD	78	1	3.3	.	2835	560.5	4048.5	0.88	L	1.3331	97643	21.8	1979	1996	17	21	A	10.4	0	1.733	0.833	Y	3.556	0.983	0
Boreal river impoundments caused nearshore fish community assemblage shifts but little change in diversity: A multi-scale analysis	Canadian Journal of Fisheries and Aquatic Sciences	2018	JOURNAL	K. Turgeon, C. Turpin, I. Gregory-Eaves	https://doi.org/10.1139/cjfas-2017-0581	37	TURG2018	10	21	1	104	B	Temperate_coastal_rivers	Eastern_Hudson_Baie-Ungava	CANADA	53°44'13.4"N	76°55'27.9"W	53.7371	-76.9244	ROBERT-BOURASSA	LG2	RB-G2404	HYDRO	UD	103.2	1	3.3	.	2835	560.5	4048.5	0.88	L	1.3331	97643	21.8	1979	1978	-1	21	B	15.4455	0	1.666	0.723	Y	3.392	0.877	0
Boreal river impoundments caused nearshore fish community assemblage shifts but little change in diversity: A multi-scale analysis	Canadian Journal of Fisheries and Aquatic Sciences	2018	JOURNAL	K. Turgeon, C. Turpin, I. Gregory-Eaves	https://doi.org/10.1139/cjfas-2017-0582	37	TURG2018	10	22	2	104	B	Temperate_coastal_rivers	Eastern_Hudson_Baie-Ungava	CANADA	53°44'13.4"N	76°55'27.9"W	53.7371	-76.9244	ROBERT-BOURASSA	LG2	RB-G2404	HYDRO	UD	103.2	1	3.3	.	2835	560.5	4048.5	0.88	L	1.3331	97643	21.8	1979	1979	0	21	F	15.5	0	1.641	0.747	Y	3.122	0.861	0
Boreal river impoundments caused nearshore fish community assemblage shifts but little change in diversity: A multi-scale analysis	Canadian Journal of Fisheries and Aquatic Sciences	2018	JOURNAL	K. Turgeon, C. Turpin, I. Gregory-Eaves	https://doi.org/10.1139/cjfas-2017-0583	37	TURG2018	10	23	3	104	B	Temperate_coastal_rivers	Eastern_Hudson_Baie-Ungava	CANADA	53°44'13.4"N	76°55'27.9"W	53.7371	-76.9244	ROBERT-BOURASSA	LG2	RB-G2404	HYDRO	UD	103.2	1	3.3	.	2835	560.5	4048.5	0.88	L	1.3331	97643	21.8	1979	1980	1	21	A	13.5	0	1.518	0.73	Y	3.22	0.76	0
Boreal river impoundments caused nearshore fish community assemblage shifts but little change in diversity: A multi-scale analysis	Canadian Journal of Fisheries and Aquatic Sciences	2018	JOURNAL	K. Turgeon, C. Turpin, I. Gregory-Eaves	https://doi.org/10.1139/cjfas-2017-0584	37	TURG2018	10	24	4	104	B	Temperate_coastal_rivers	Eastern_Hudson_Baie-Ungava	CANADA	53°44'13.4"N	76°55'27.9"W	53.7371	-76.9244	ROBERT-BOURASSA	LG2	RB-G2404	HYDRO	UD	103.2	1	3.3	.	2835	560.5	4048.5	0.88	L	1.3331	97643	21.8	1979	1981	2	21	A	8.98611	0	1.528	0.785	Y	3.291	0.83	0
Boreal river impoundments caused nearshore fish community assemblage shifts but little change in diversity: A multi-scale analysis	Canadian Journal of Fisheries and Aquatic Sciences	2018	JOURNAL	K. Turgeon, C. Turpin, I. Gregory-Eaves	https://doi.org/10.1139/cjfas-2017-0585	37	TURG2018	10	25	5	104	B	Temperate_coastal_rivers	Eastern_Hudson_Baie-Ungava	CANADA	53°44'13.4"N	76°55'27.9"W	53.7371	-76.9244	ROBERT-BOURASSA	LG2	RB-G2404	HYDRO	UD	103.2	1	3.3	.	2835	560.5	4048.5	0.88	L	1.3331	97643	21.8	1979	1982	3	21	A	12.3333	0	1.6	0.77	Y	3.406	0.843	0
Boreal river impoundments caused nearshore fish community assemblage shifts but little change in diversity: A multi-scale analysis	Canadian Journal of Fisheries and Aquatic Sciences	2018	JOURNAL	K. Turgeon, C. Turpin, I. Gregory-Eaves	https://doi.org/10.1139/cjfas-2017-0586	37	TURG2018	10	26	6	104	B	Temperate_coastal_rivers	Eastern_Hudson_Baie-Ungava	CANADA	53°44'13.4"N	76°55'27.9"W	53.7371	-76.9244	ROBERT-BOURASSA	LG2	RB-G2404	HYDRO	UD	103.2	1	3.3	.	2835	560.5	4048.5	0.88	L	1.3331	97643	21.8	1979	1983	4	21	A	8.96667	0	1.605	0.825	Y	3.358	0.909	0
Boreal river impoundments caused nearshore fish community assemblage shifts but little change in diversity: A multi-scale analysis	Canadian Journal of Fisheries and Aquatic Sciences	2018	JOURNAL	K. Turgeon, C. Turpin, I. Gregory-Eaves	https://doi.org/10.1139/cjfas-2017-0587	37	TURG2018	10	27	7	104	B	Temperate_coastal_rivers	Eastern_Hudson_Baie-Ungava	CANADA	53°44'13.4"N	76°55'27.9"W	53.7371	-76.9244	ROBERT-BOURASSA	LG2	RB-G2404	HYDRO	UD	103.2	1	3.3	.	2835	560.5	4048.5	0.88	L	1.3331	97643	21.8	1979	1984	5	21	A	11	0	1.614	0.829	Y	3.472	0.858	0
Boreal river impoundments caused nearshore fish community assemblage shifts but little change in diversity: A multi-scale analysis	Canadian Journal of Fisheries and Aquatic Sciences	2018	JOURNAL	K. Turgeon, C. Turpin, I. Gregory-Eaves	https://doi.org/10.1139/cjfas-2017-0588	37	TURG2018	10	28	8	104	B	Temperate_coastal_rivers	Eastern_Hudson_Baie-Ungava	CANADA	53°44'13.4"N	76°55'27.9"W	53.7371	-76.9244	ROBERT-BOURASSA	LG2	RB-G2404	HYDRO	UD	103.2	1	3.3	.	2835	560.5	4048.5	0.88	L	1.3331	97643	21.8	1979	1988	9	21	A	12.5	0	1.364	0.701	Y	3.524	0.924	0
Boreal river impoundments caused nearshore fish community assemblage shifts but little change in diversity: A multi-scale analysis	Canadian Journal of Fisheries and Aquatic Sciences	2018	JOURNAL	K. Turgeon, C. Turpin, I. Gregory-Eaves	https://doi.org/10.1139/cjfas-2017-0589	37	TURG2018	10	29	9	104	B	Temperate_coastal_rivers	Eastern_Hudson_Baie-Ungava	CANADA	53°44'13.4"N	76°55'27.9"W	53.7371	-76.9244	ROBERT-BOURASSA	LG2	RB-G2404	HYDRO	UD	103.2	1	3.3	.	2835	560.5	4048.5	0.88	L	1.3331	97643	21.8	1979	1992	13	21	A	7.96667	0	1.585	0.885	Y	3.621	0.959	0
Boreal river impoundments caused nearshore fish community assemblage shifts but little change in diversity: A multi-scale analysis	Canadian Journal of Fisheries and Aquatic Sciences	2018	JOURNAL	K. Turgeon, C. Turpin, I. Gregory-Eaves	https://doi.org/10.1139/cjfas-2017-0590	37	TURG2018	10	30	10	104	B	Temperate_coastal_rivers	Eastern_Hudson_Baie-Ungava	CANADA	53°44'13.4"N	76°55'27.9"W	53.7371	-76.9244	ROBERT-BOURASSA	LG2	RB-G2404	HYDRO	UD	103.2	1	3.3	.	2835	560.5	4048.5	0.88	L	1.3331	97643	21.8	1979	1996	17	21	A	12.7424	0	1.565	0.712	Y	3.511	0.942	0
Boreal river impoundments caused nearshore fish community assemblage shifts but little change in diversity: A multi-scale analysis	Canadian Journal of Fisheries and Aquatic Sciences	2018	JOURNAL	K. Turgeon, C. Turpin, I. Gregory-Eaves	https://doi.org/10.1139/cjfas-2017-0591	37	TURG2018	10	31	1	105	B	Temperate_coastal_rivers	Eastern_Hudson_Baie-Ungava	CANADA	53°44'13.4"N	76°55'27.9"W	53.7371	-76.9244	ROBERT-BOURASSA	LG2	RB-G2406	HYDRO	UD	157.5	1	3.3	.	2835	560.5	4048.5	0.88	L	1.3331	97643	21.8	1979	1978	-1	21	B	7.98611	0	1.772	0.989	Y	3.607	0.889	0
Boreal river impoundments caused nearshore fish community assemblage shifts but little change in diversity: A multi-scale analysis	Canadian Journal of Fisheries and Aquatic Sciences	2018	JOURNAL	K. Turgeon, C. Turpin, I. Gregory-Eaves	https://doi.org/10.1139/cjfas-2017-0592	37	TURG2018	10	32	2	105	B	Temperate_coastal_rivers	Eastern_Hudson_Baie-Ungava	CANADA	53°44'13.4"N	76°55'27.9"W	53.7371	-76.9244	ROBERT-BOURASSA	LG2	RB-G2406	HYDRO	UD	157.5	1	3.3	.	2835	560.5	4048.5	0.88	L	1.3331	97643	21.8	1979	1979	0	21	F	7.17279	0	1.576	0.81	Y	3.598	0.976	0
Boreal river impoundments caused nearshore fish community assemblage shifts but little change in diversity: A multi-scale analysis	Canadian Journal of Fisheries and Aquatic Sciences	2018	JOURNAL	K. Turgeon, C. Turpin, I. Gregory-Eaves	https://doi.org/10.1139/cjfas-2017-0593	37	TURG2018	10	33	3	105	B	Temperate_coastal_rivers	Eastern_Hudson_Baie-Ungava	CANADA	53°44'13.4"N	76°55'27.9"W	53.7371	-76.9244	ROBERT-BOURASSA	LG2	RB-G2406	HYDRO	UD	157.5	1	3.3	.	2835	560.5	4048.5	0.88	L	1.3331	97643	21.8	1979	1980	1	21	A	5.46667	0	1.589	0.987	Y	3.457	1	0
Boreal river impoundments caused nearshore fish community assemblage shifts but little change in diversity: A multi-scale analysis	Canadian Journal of Fisheries and Aquatic Sciences	2018	JOURNAL	K. Turgeon, C. Turpin, I. Gregory-Eaves	https://doi.org/10.1139/cjfas-2017-0594	37	TURG2018	10	34	4	105	B	Temperate_coastal_rivers	Eastern_Hudson_Baie-Ungava	CANADA	53°44'13.4"N	76°55'27.9"W	53.7371	-76.9244	ROBERT-BOURASSA	LG2	RB-G2406	HYDRO	UD	157.5	1	3.3	.	2835	560.5	4048.5	0.88	L	1.3331	97643	21.8	1979	1981	2	21	A	16.25	0	1.569	0.681	Y	3.549	0.977	0
Boreal river impoundments caused nearshore fish community assemblage shifts but little change in diversity: A multi-scale analysis	Canadian Journal of Fisheries and Aquatic Sciences	2018	JOURNAL	K. Turgeon, C. Turpin, I. Gregory-Eaves	https://doi.org/10.1139/cjfas-2017-0595	37	TURG2018	10	35	5	105	B	Temperate_coastal_rivers	Eastern_Hudson_Baie-Ungava	CANADA	53°44'13.4"N	76°55'27.9"W	53.7371	-76.9244	ROBERT-BOURASSA	LG2	RB-G2406	HYDRO	UD	157.5	1	3.3	.	2835	560.5	4048.5	0.88	L	1.3331	97643	21.8	1979	1982	3	21	A	7.23485	0	1.183	0.661	Y	3.676	0.989	0
Boreal river impoundments caused nearshore fish community assemblage shifts but little change in diversity: A multi-scale analysis	Canadian Journal of Fisheries and Aquatic Sciences	2018	JOURNAL	K. Turgeon, C. Turpin, I. Gregory-Eaves	https://doi.org/10.1139/cjfas-2017-0596	37	TURG2018	10	36	6	105	B	Temperate_coastal_rivers	Eastern_Hudson_Baie-Ungava	CANADA	53°44'13.4"N	76°55'27.9"W	53.7371	-76.9244	ROBERT-BOURASSA	LG2	RB-G2406	HYDRO	UD	157.5	1	3.3	.	2835	560.5	4048.5	0.88	L	1.3331	97643	21.8	1979	1983	4	21	A	9	0	1.375	0.854	Y	3.76	1	0
Boreal river impoundments caused nearshore fish community assemblage shifts but little change in diversity: A multi-scale analysis	Canadian Journal of Fisheries and Aquatic Sciences	2018	JOURNAL	K. Turgeon, C. Turpin, I. Gregory-Eaves	https://doi.org/10.1139/cjfas-2017-0597	37	TURG2018	10	37	7	105	B	Temperate_coastal_rivers	Eastern_Hudson_Baie-Ungava	CANADA	53°44'13.4"N	76°55'27.9"W	53.7371	-76.9244	ROBERT-BOURASSA	LG2	RB-G2406	HYDRO	UD	157.5	1	3.3	.	2835	560.5	4048.5	0.88	L	1.3331	97643	21.8	1979	1984	5	21	A	10.5714	0	1.498	0.836	Y	3.637	1	0
Boreal river impoundments caused nearshore fish community assemblage shifts but little change in diversity: A multi-scale analysis	Canadian Journal of Fisheries and Aquatic Sciences	2018	JOURNAL	K. Turgeon, C. Turpin, I. Gregory-Eaves	https://doi.org/10.1139/cjfas-2017-0598	37	TURG2018	10	38	8	105	B	Temperate_coastal_rivers	Eastern_Hudson_Baie-Ungava	CANADA	53°44'13.4"N	76°55'27.9"W	53.7371	-76.9244	ROBERT-BOURASSA	LG2	RB-G2406	HYDRO	UD	157.5	1	3.3	.	2835	560.5	4048.5	0.88	L	1.3331	97643	21.8	1979	1988	9	21	A	5.5	0	0.797	0.725	Y	3.852	1	0
Boreal river impoundments caused nearshore fish community assemblage shifts but little change in diversity: A multi-scale analysis	Canadian Journal of Fisheries and Aquatic Sciences	2018	JOURNAL	K. Turgeon, C. Turpin, I. Gregory-Eaves	https://doi.org/10.1139/cjfas-2017-0599	37	TURG2018	10	39	9	105	B	Temperate_coastal_rivers	Eastern_Hudson_Baie-Ungava	CANADA	53°44'13.4"N	76°55'27.9"W	53.7371	-76.9244	ROBERT-BOURASSA	LG2	RB-G2406	HYDRO	UD	157.5	1	3.3	.	2835	560.5	4048.5	0.88	L	1.3331	97643	21.8	1979	1992	13	21	A	8.46667	0	1.415	0.879	Y	3.763	1	0
Boreal river impoundments caused nearshore fish community assemblage shifts but little change in diversity: A multi-scale analysis	Canadian Journal of Fisheries and Aquatic Sciences	2018	JOURNAL	K. Turgeon, C. Turpin, I. Gregory-Eaves	https://doi.org/10.1139/cjfas-2017-0600	37	TURG2018	10	40	10	105	B	Temperate_coastal_rivers	Eastern_Hudson_Baie-Ungava	CANADA	53°44'13.4"N	76°55'27.9"W	53.7371	-76.9244	ROBERT-BOURASSA	LG2	RB-G2406	HYDRO	UD	157.5	1	3.3	.	2835	560.5	4048.5	0.88	L	1.3331	97643	21.8	1979	1996	17	21	A	8.74242	0	1.04	0.646	Y	3.926	1	0
Boreal river impoundments caused nearshore fish community assemblage shifts but little change in diversity: A multi-scale analysis	Canadian Journal of Fisheries and Aquatic Sciences	2018	JOURNAL	K. Turgeon, C. Turpin, I. Gregory-Eaves	https://doi.org/10.1139/cjfas-2017-0601	37	TURG2018	10	41	1	106	B	Temperate_coastal_rivers	Eastern_Hudson_Baie-Ungava	CANADA	53°44'13.4"N	76°55'27.9"W	53.7371	-76.9244	ROBERT-BOURASSA	LG2	RB-G2403	HYDRO	UD	138	1	3.3	.	2835	560.5	4048.5	0.88	L	1.3331	97643	21.8	1979	1978	-1	21	B	10.8	0	1.855	0.892	Y	3.569	0.799	0
Boreal river impoundments caused nearshore fish community assemblage shifts but little change in diversity: A multi-scale analysis	Canadian Journal of Fisheries and Aquatic Sciences	2018	JOURNAL	K. Turgeon, C. Turpin, I. Gregory-Eaves	https://doi.org/10.1139/cjfas-2017-0602	37	TURG2018	10	42	2	106	B	Temperate_coastal_rivers	Eastern_Hudson_Baie-Ungava	CANADA	53°44'13.4"N	76°55'27.9"W	53.7371	-76.9244	ROBERT-BOURASSA	LG2	RB-G2403	HYDRO	UD	138	1	3.3	.	2835	560.5	4048.5	0.88	L	1.3331	97643	21.8	1979	1979	0	21	F	16.3516	0	1.699	0.773	Y	3.679	0.979	0
Boreal river impoundments caused nearshore fish community assemblage shifts but little change in diversity: A multi-scale analysis	Canadian Journal of Fisheries and Aquatic Sciences	2018	JOURNAL	K. Turgeon, C. Turpin, I. Gregory-Eaves	https://doi.org/10.1139/cjfas-2017-0603	37	TURG2018	10	43	3	106	B	Temperate_coastal_rivers	Eastern_Hudson_Baie-Ungava	CANADA	53°44'13.4"N	76°55'27.9"W	53.7371	-76.9244	ROBERT-BOURASSA	LG2	RB-G2403	HYDRO	UD	138	1	3.3	.	2835	560.5	4048.5	0.88	L	1.3331	97643	21.8	1979	1980	1	21	A	9.25	0	1.973	0.949	Y	3.325	0.868	0
Boreal river impoundments caused nearshore fish community assemblage shifts but little change in diversity: A multi-scale analysis	Canadian Journal of Fisheries and Aquatic Sciences	2018	JOURNAL	K. Turgeon, C. Turpin, I. Gregory-Eaves	https://doi.org/10.1139/cjfas-2017-0604	37	TURG2018	10	44	4	106	B	Temperate_coastal_rivers	Eastern_Hudson_Baie-Ungava	CANADA	53°44'13.4"N	76°55'27.9"W	53.7371	-76.9244	ROBERT-BOURASSA	LG2	RB-G2403	HYDRO	UD	138	1	3.3	.	2835	560.5	4048.5	0.88	L	1.3331	97643	21.8	1979	1981	2	21	A	11.75	0	1.898	0.864	Y	3.479	0.929	0
Boreal river impoundments caused nearshore fish community assemblage shifts but little change in diversity: A multi-scale analysis	Canadian Journal of Fisheries and Aquatic Sciences	2018	JOURNAL	K. Turgeon, C. Turpin, I. Gregory-Eaves	https://doi.org/10.1139/cjfas-2017-0605	37	TURG2018	10	45	5	106	B	Temperate_coastal_rivers	Eastern_Hudson_Baie-Ungava	CANADA	53°44'13.4"N	76°55'27.9"W	53.7371	-76.9244	ROBERT-BOURASSA	LG2	RB-G2403	HYDRO	UD	138	1	3.3	.	2835	560.5	4048.5	0.88	L	1.3331	97643	21.8	1979	1982	3	21	A	9	0	1.726	0.83	Y	3.627	0.944	0
Boreal river impoundments caused nearshore fish community assemblage shifts but little change in diversity: A multi-scale analysis	Canadian Journal of Fisheries and Aquatic Sciences	2018	JOURNAL	K. Turgeon, C. Turpin, I. Gregory-Eaves	https://doi.org/10.1139/cjfas-2017-0606	37	TURG2018	10	46	6	106	B	Temperate_coastal_rivers	Eastern_Hudson_Baie-Ungava	CANADA	53°44'13.4"N	76°55'27.9"W	53.7371	-76.9244	ROBERT-BOURASSA	LG2	RB-G2403	HYDRO	UD	138	1	3.3	.	2835	560.5	4048.5	0.88	L	1.3331	97643	21.8	1979	1983	4	21	A	12.9667	0	1.556	0.748	Y	3.571	0.994	0
Boreal river impoundments caused nearshore fish community assemblage shifts but little change in diversity: A multi-scale analysis	Canadian Journal of Fisheries and Aquatic Sciences	2018	JOURNAL	K. Turgeon, C. Turpin, I. Gregory-Eaves	https://doi.org/10.1139/cjfas-2017-0607	37	TURG2018	10	47	7	106	B	Temperate_coastal_rivers	Eastern_Hudson_Baie-Ungava	CANADA	53°44'13.4"N	76°55'27.9"W	53.7371	-76.9244	ROBERT-BOURASSA	LG2	RB-G2403	HYDRO	UD	138	1	3.3	.	2835	560.5	4048.5	0.88	L	1.3331	97643	21.8	1979	1984	5	21	A	8.9	0	1.385	0.666	Y	3.657	0.984	0
Boreal river impoundments caused nearshore fish community assemblage shifts but little change in diversity: A multi-scale analysis	Canadian Journal of Fisheries and Aquatic Sciences	2018	JOURNAL	K. Turgeon, C. Turpin, I. Gregory-Eaves	https://doi.org/10.1139/cjfas-2017-0608	37	TURG2018	10	48	8	106	B	Temperate_coastal_rivers	Eastern_Hudson_Baie-Ungava	CANADA	53°44'13.4"N	76°55'27.9"W	53.7371	-76.9244	ROBERT-BOURASSA	LG2	RB-G2403	HYDRO	UD	138	1	3.3	.	2835	560.5	4048.5	0.88	L	1.3331	97643	21.8	1979	1988	9	21	A	5.5	0	0.899	0.818	Y	3.877	1	0
Boreal river impoundments caused nearshore fish community assemblage shifts but little change in diversity: A multi-scale analysis	Canadian Journal of Fisheries and Aquatic Sciences	2018	JOURNAL	K. Turgeon, C. Turpin, I. Gregory-Eaves	https://doi.org/10.1139/cjfas-2017-0609	37	TURG2018	10	49	9	106	B	Temperate_coastal_rivers	Eastern_Hudson_Baie-Ungava	CANADA	53°44'13.4"N	76°55'27.9"W	53.7371	-76.9244	ROBERT-BOURASSA	LG2	RB-G2403	HYDRO	UD	138	1	3.3	.	2835	560.5	4048.5	0.88	L	1.3331	97643	21.8	1979	1992	13	21	A	11.4333	0	1.647	0.847	Y	3.678	0.98	0
Boreal river impoundments caused nearshore fish community assemblage shifts but little change in diversity: A multi-scale analysis	Canadian Journal of Fisheries and Aquatic Sciences	2018	JOURNAL	K. Turgeon, C. Turpin, I. Gregory-Eaves	https://doi.org/10.1139/cjfas-2017-0610	37	TURG2018	10	50	10	106	B	Temperate_coastal_rivers	Eastern_Hudson_Baie-Ungava	CANADA	53°44'13.4"N	76°55'27.9"W	53.7371	-76.9244	ROBERT-BOURASSA	LG2	RB-G2403	HYDRO	UD	138	1	3.3	.	2835	560.5	4048.5	0.88	L	1.3331	97643	21.8	1979	1996	17	21	A	10.6071	0	1.424	0.732	Y	3.875	1	0
Boreal river impoundments caused nearshore fish community assemblage shifts but little change in diversity: A multi-scale analysis	Canadian Journal of Fisheries and Aquatic Sciences	2018	JOURNAL	K. Turgeon, C. Turpin, I. Gregory-Eaves	https://doi.org/10.1139/cjfas-2017-0611	37	TURG2018	7	51	1	107	B	Temperate_coastal_rivers	Eastern_Hudson_Baie-Ungava	CANADA	53°44'13.4"N	76°55'27.9"W	53.7371	-76.9244	ROBERT-BOURASSA	LG2	RB-G2402	HYDRO	UD	121.8	1	3.3	.	2835	560.5	4048.5	0.88	L	1.3331	97643	21.8	1979	1978	-1	21	B	6.625	0	1.778	0.992	Y	3.475	0.65	0
Boreal river impoundments caused nearshore fish community assemblage shifts but little change in diversity: A multi-scale analysis	Canadian Journal of Fisheries and Aquatic Sciences	2018	JOURNAL	K. Turgeon, C. Turpin, I. Gregory-Eaves	https://doi.org/10.1139/cjfas-2017-0612	37	TURG2018	7	52	2	107	B	Temperate_coastal_rivers	Eastern_Hudson_Baie-Ungava	CANADA	53°44'13.4"N	76°55'27.9"W	53.7371	-76.9244	ROBERT-BOURASSA	LG2	RB-G2402	HYDRO	UD	121.8	1	3.3	.	2835	560.5	4048.5	0.88	L	1.3331	97643	21.8	1979	1979	0	21	F	19.6273	0	1.765	0.803	Y	3.26	0.929	0
Boreal river impoundments caused nearshore fish community assemblage shifts but little change in diversity: A multi-scale analysis	Canadian Journal of Fisheries and Aquatic Sciences	2018	JOURNAL	K. Turgeon, C. Turpin, I. Gregory-Eaves	https://doi.org/10.1139/cjfas-2017-0613	37	TURG2018	7	53	3	107	B	Temperate_coastal_rivers	Eastern_Hudson_Baie-Ungava	CANADA	53°44'13.4"N	76°55'27.9"W	53.7371	-76.9244	ROBERT-BOURASSA	LG2	RB-G2402	HYDRO	UD	121.8	1	3.3	.	2835	560.5	4048.5	0.88	L	1.3331	97643	21.8	1979	1980	1	21	A	10.4	0	2.047	0.985	Y	3.525	0.875	0
Boreal river impoundments caused nearshore fish community assemblage shifts but little change in diversity: A multi-scale analysis	Canadian Journal of Fisheries and Aquatic Sciences	2018	JOURNAL	K. Turgeon, C. Turpin, I. Gregory-Eaves	https://doi.org/10.1139/cjfas-2017-0614	37	TURG2018	7	54	4	107	B	Temperate_coastal_rivers	Eastern_Hudson_Baie-Ungava	CANADA	53°44'13.4"N	76°55'27.9"W	53.7371	-76.9244	ROBERT-BOURASSA	LG2	RB-G2402	HYDRO	UD	121.8	1	3.3	.	2835	560.5	4048.5	0.88	L	1.3331	97643	21.8	1979	1981	2	21	A	12.7424	0	1.682	0.766	Y	3.703	0.942	0
Boreal river impoundments caused nearshore fish community assemblage shifts but little change in diversity: A multi-scale analysis	Canadian Journal of Fisheries and Aquatic Sciences	2018	JOURNAL	K. Turgeon, C. Turpin, I. Gregory-Eaves	https://doi.org/10.1139/cjfas-2017-0615	37	TURG2018	7	55	5	107	B	Temperate_coastal_rivers	Eastern_Hudson_Baie-Ungava	CANADA	53°44'13.4"N	76°55'27.9"W	53.7371	-76.9244	ROBERT-BOURASSA	LG2	RB-G2402	HYDRO	UD	121.8	1	3.3	.	2835	560.5	4048.5	0.88	L	1.3331	97643	21.8	1979	1982	3	21	A	8.99091	0	1.408	0.724	Y	3.681	0.986	0
Boreal river impoundments caused nearshore fish community assemblage shifts but little change in diversity: A multi-scale analysis	Canadian Journal of Fisheries and Aquatic Sciences	2018	JOURNAL	K. Turgeon, C. Turpin, I. Gregory-Eaves	https://doi.org/10.1139/cjfas-2017-0616	37	TURG2018	7	56	6	107	B	Temperate_coastal_rivers	Eastern_Hudson_Baie-Ungava	CANADA	53°44'13.4"N	76°55'27.9"W	53.7371	-76.9244	ROBERT-BOURASSA	LG2	RB-G2402	HYDRO	UD	121.8	1	3.3	.	2835	560.5	4048.5	0.88	L	1.3331	97643	21.8	1979	1983	4	21	A	6.46667	0	1.599	0.892	Y	3.488	0.976	0
Boreal river impoundments caused nearshore fish community assemblage shifts but little change in diversity: A multi-scale analysis	Canadian Journal of Fisheries and Aquatic Sciences	2018	JOURNAL	K. Turgeon, C. Turpin, I. Gregory-Eaves	https://doi.org/10.1139/cjfas-2017-0617	37	TURG2018	7	57	7	107	B	Temperate_coastal_rivers	Eastern_Hudson_Baie-Ungava	CANADA	53°44'13.4"N	76°55'27.9"W	53.7371	-76.9244	ROBERT-BOURASSA	LG2	RB-G2402	HYDRO	UD	121.8	1	3.3	.	2835	560.5	4048.5	0.88	L	1.3331	97643	21.8	1979	1984	5	21	A	5.63889	0	1.408	0.786	Y	3.613	0.955	0
Boreal river impoundments caused nearshore fish community assemblage shifts but little change in diversity: A multi-scale analysis	Canadian Journal of Fisheries and Aquatic Sciences	2018	JOURNAL	K. Turgeon, C. Turpin, I. Gregory-Eaves	https://doi.org/10.1139/cjfas-2017-0618	37	TURG2018	12	58	1	108	B	Temperate_coastal_rivers	Eastern_Hudson_Baie-Ungava	CANADA	53°44'13.4"N	76°55'27.9"W	53.7371	-76.9244	ROBERT-BOURASSA	LG2	RB-G1300	HYDRO	D	122.4	1	3.3	.	2835	560.5	4048.5	0.88	L	1.3331	97643	21.8	1979	1978	-1	21	B	9.93333	0	1.569	0.806	Y	3.084	0.974	0
Boreal river impoundments caused nearshore fish community assemblage shifts but little change in diversity: A multi-scale analysis	Canadian Journal of Fisheries and Aquatic Sciences	2018	JOURNAL	K. Turgeon, C. Turpin, I. Gregory-Eaves	https://doi.org/10.1139/cjfas-2017-0619	37	TURG2018	12	59	2	108	B	Temperate_coastal_rivers	Eastern_Hudson_Baie-Ungava	CANADA	53°44'13.4"N	76°55'27.9"W	53.7371	-76.9244	ROBERT-BOURASSA	LG2	RB-G1300	HYDRO	D	122.4	1	3.3	.	2835	560.5	4048.5	0.88	L	1.3331	97643	21.8	1979	1979	0	21	F	13.9848	0	1.366	0.569	Y	3.044	0.956	0
Boreal river impoundments caused nearshore fish community assemblage shifts but little change in diversity: A multi-scale analysis	Canadian Journal of Fisheries and Aquatic Sciences	2018	JOURNAL	K. Turgeon, C. Turpin, I. Gregory-Eaves	https://doi.org/10.1139/cjfas-2017-0620	37	TURG2018	12	60	3	108	B	Temperate_coastal_rivers	Eastern_Hudson_Baie-Ungava	CANADA	53°44'13.4"N	76°55'27.9"W	53.7371	-76.9244	ROBERT-BOURASSA	LG2	RB-G1300	HYDRO	D	122.4	1	3.3	.	2835	560.5	4048.5	0.88	L	1.3331	97643	21.8	1979	1980	1	21	A	14.1818	0	1.808	0.869	Y	3.34	0.913	0
Boreal river impoundments caused nearshore fish community assemblage shifts but little change in diversity: A multi-scale analysis	Canadian Journal of Fisheries and Aquatic Sciences	2018	JOURNAL	K. Turgeon, C. Turpin, I. Gregory-Eaves	https://doi.org/10.1139/cjfas-2017-0621	37	TURG2018	12	61	4	108	B	Temperate_coastal_rivers	Eastern_Hudson_Baie-Ungava	CANADA	53°44'13.4"N	76°55'27.9"W	53.7371	-76.9244	ROBERT-BOURASSA	LG2	RB-G1300	HYDRO	D	122.4	1	3.3	.	2835	560.5	4048.5	0.88	L	1.3331	97643	21.8	1979	1981	2	21	A	13.4	0	1.419	0.682	Y	3.116	0.982	0
Boreal river impoundments caused nearshore fish community assemblage shifts but little change in diversity: A multi-scale analysis	Canadian Journal of Fisheries and Aquatic Sciences	2018	JOURNAL	K. Turgeon, C. Turpin, I. Gregory-Eaves	https://doi.org/10.1139/cjfas-2017-0622	37	TURG2018	12	62	5	108	B	Temperate_coastal_rivers	Eastern_Hudson_Baie-Ungava	CANADA	53°44'13.4"N	76°55'27.9"W	53.7371	-76.9244	ROBERT-BOURASSA	LG2	RB-G1300	HYDRO	D	122.4	1	3.3	.	2835	560.5	4048.5	0.88	L	1.3331	97643	21.8	1979	1982	3	21	A	11.0833	0	1.345	0.691	Y	3.096	0.951	0
Boreal river impoundments caused nearshore fish community assemblage shifts but little change in diversity: A multi-scale analysis	Canadian Journal of Fisheries and Aquatic Sciences	2018	JOURNAL	K. Turgeon, C. Turpin, I. Gregory-Eaves	https://doi.org/10.1139/cjfas-2017-0623	37	TURG2018	12	63	6	108	B	Temperate_coastal_rivers	Eastern_Hudson_Baie-Ungava	CANADA	53°44'13.4"N	76°55'27.9"W	53.7371	-76.9244	ROBERT-BOURASSA	LG2	RB-G1300	HYDRO	D	122.4	1	3.3	.	2835	560.5	4048.5	0.88	L	1.3331	97643	21.8	1979	1983	4	21	A	12.9722	0	1.264	0.549	Y	2.992	0.952	0
Boreal river impoundments caused nearshore fish community assemblage shifts but little change in diversity: A multi-scale analysis	Canadian Journal of Fisheries and Aquatic Sciences	2018	JOURNAL	K. Turgeon, C. Turpin, I. Gregory-Eaves	https://doi.org/10.1139/cjfas-2017-0624	37	TURG2018	12	64	7	108	B	Temperate_coastal_rivers	Eastern_Hudson_Baie-Ungava	CANADA	53°44'13.4"N	76°55'27.9"W	53.7371	-76.9244	ROBERT-BOURASSA	LG2	RB-G1300	HYDRO	D	122.4	1	3.3	.	2835	560.5	4048.5	0.88	L	1.3331	97643	21.8	1979	1984	5	21	A	6.93333	0	0.892	0.458	Y	2.941	0.955	0
Boreal river impoundments caused nearshore fish community assemblage shifts but little change in diversity: A multi-scale analysis	Canadian Journal of Fisheries and Aquatic Sciences	2018	JOURNAL	K. Turgeon, C. Turpin, I. Gregory-Eaves	https://doi.org/10.1139/cjfas-2017-0625	37	TURG2018	12	65	8	108	B	Temperate_coastal_rivers	Eastern_Hudson_Baie-Ungava	CANADA	53°44'13.4"N	76°55'27.9"W	53.7371	-76.9244	ROBERT-BOURASSA	LG2	RB-G1300	HYDRO	D	122.4	1	3.3	.	2835	560.5	4048.5	0.88	L	1.3331	97643	21.8	1979	1988	9	21	A	9.9	0	1.811	0.824	Y	3.298	0.934	0
Boreal river impoundments caused nearshore fish community assemblage shifts but little change in diversity: A multi-scale analysis	Canadian Journal of Fisheries and Aquatic Sciences	2018	JOURNAL	K. Turgeon, C. Turpin, I. Gregory-Eaves	https://doi.org/10.1139/cjfas-2017-0626	37	TURG2018	12	66	9	108	B	Temperate_coastal_rivers	Eastern_Hudson_Baie-Ungava	CANADA	53°44'13.4"N	76°55'27.9"W	53.7371	-76.9244	ROBERT-BOURASSA	LG2	RB-G1300	HYDRO	D	122.4	1	3.3	.	2835	560.5	4048.5	0.88	L	1.3331	97643	21.8	1979	1992	13	21	A	9.41667	0	1.608	0.999	Y	2.886	1	0
Boreal river impoundments caused nearshore fish community assemblage shifts but little change in diversity: A multi-scale analysis	Canadian Journal of Fisheries and Aquatic Sciences	2018	JOURNAL	K. Turgeon, C. Turpin, I. Gregory-Eaves	https://doi.org/10.1139/cjfas-2017-0627	37	TURG2018	12	67	10	108	B	Temperate_coastal_rivers	Eastern_Hudson_Baie-Ungava	CANADA	53°44'13.4"N	76°55'27.9"W	53.7371	-76.9244	ROBERT-BOURASSA	LG2	RB-G1300	HYDRO	D	122.4	1	3.3	.	2835	560.5	4048.5	0.88	L	1.3331	97643	21.8	1979	1994	15	21	A	10.4	0	1.072	0.598	Y	3.105	0.992	0
Boreal river impoundments caused nearshore fish community assemblage shifts but little change in diversity: A multi-scale analysis	Canadian Journal of Fisheries and Aquatic Sciences	2018	JOURNAL	K. Turgeon, C. Turpin, I. Gregory-Eaves	https://doi.org/10.1139/cjfas-2017-0628	37	TURG2018	12	68	11	108	B	Temperate_coastal_rivers	Eastern_Hudson_Baie-Ungava	CANADA	53°44'13.4"N	76°55'27.9"W	53.7371	-76.9244	ROBERT-BOURASSA	LG2	RB-G1300	HYDRO	D	122.4	1	3.3	.	2835	560.5	4048.5	0.88	L	1.3331	97643	21.8	1979	1996	17	21	A	12.7424	0	1.319	0.6	Y	3.341	0.969	0
Boreal river impoundments caused nearshore fish community assemblage shifts but little change in diversity: A multi-scale analysis	Canadian Journal of Fisheries and Aquatic Sciences	2018	JOURNAL	K. Turgeon, C. Turpin, I. Gregory-Eaves	https://doi.org/10.1139/cjfas-2017-0629	37	TURG2018	12	69	12	108	B	Temperate_coastal_rivers	Eastern_Hudson_Baie-Ungava	CANADA	53°44'13.4"N	76°55'27.9"W	53.7371	-76.9244	ROBERT-BOURASSA	LG2	RB-G1300	HYDRO	D	122.4	1	3.3	.	2835	560.5	4048.5	0.88	L	1.3331	97643	21.8	1979	2000	21	21	A	6	0	1.248	0.775	Y	3.155	0.809	0
Boreal river impoundments caused nearshore fish community assemblage shifts but little change in diversity: A multi-scale analysis	Canadian Journal of Fisheries and Aquatic Sciences	2018	JOURNAL	K. Turgeon, C. Turpin, I. Gregory-Eaves	https://doi.org/10.1139/cjfas-2017-0630	37	TURG2018	10	1	1	109	B	Temperate_coastal_rivers	Eastern_Hudson_Baie-Ungava	CANADA	52°39'48.4"N	76°22'10.9"W	52.6634	-76.3697	OPINACA	OPINACA	OP-EM400	HYDRO	UD	11.6	0.5	3.6	.	1040	569.91	730.09	0.64	L	1.49492	30000	8.2	1980	1978	-2	16	B	9.98611	0	1.559	0.75	Y	3.449	0.908	0
Boreal river impoundments caused nearshore fish community assemblage shifts but little change in diversity: A multi-scale analysis	Canadian Journal of Fisheries and Aquatic Sciences	2018	JOURNAL	K. Turgeon, C. Turpin, I. Gregory-Eaves	https://doi.org/10.1139/cjfas-2017-0631	37	TURG2018	10	2	2	109	B	Temperate_coastal_rivers	Eastern_Hudson_Baie-Ungava	CANADA	52°39'48.4"N	76°22'10.9"W	52.6634	-76.3697	OPINACA	OPINACA	OP-EM400	HYDRO	UD	11.6	0.5	3.6	.	1040	569.91	730.09	0.64	L	1.49492	30000	8.2	1980	1979	-1	16	B	11.8	0	1.785	0.813	Y	3.4	0.895	0
Boreal river impoundments caused nearshore fish community assemblage shifts but little change in diversity: A multi-scale analysis	Canadian Journal of Fisheries and Aquatic Sciences	2018	JOURNAL	K. Turgeon, C. Turpin, I. Gregory-Eaves	https://doi.org/10.1139/cjfas-2017-0632	37	TURG2018	10	3	3	109	B	Temperate_coastal_rivers	Eastern_Hudson_Baie-Ungava	CANADA	52°39'48.4"N	76°22'10.9"W	52.6634	-76.3697	OPINACA	OPINACA	OP-EM400	HYDRO	UD	11.6	0.5	3.6	.	1040	569.91	730.09	0.64	L	1.49492	30000	8.2	1980	1980	0	16	F	14.3194	0	1.894	0.862	Y	3.56	0.831	0
Boreal river impoundments caused nearshore fish community assemblage shifts but little change in diversity: A multi-scale analysis	Canadian Journal of Fisheries and Aquatic Sciences	2018	JOURNAL	K. Turgeon, C. Turpin, I. Gregory-Eaves	https://doi.org/10.1139/cjfas-2017-0633	37	TURG2018	10	4	4	109	B	Temperate_coastal_rivers	Eastern_Hudson_Baie-Ungava	CANADA	52°39'48.4"N	76°22'10.9"W	52.6634	-76.3697	OPINACA	OPINACA	OP-EM400	HYDRO	UD	11.6	0.5	3.6	.	1040	569.91	730.09	0.64	L	1.49492	30000	8.2	1980	1981	1	16	A	14.25	0	1.668	0.802	Y	3.555	0.9	0
Boreal river impoundments caused nearshore fish community assemblage shifts but little change in diversity: A multi-scale analysis	Canadian Journal of Fisheries and Aquatic Sciences	2018	JOURNAL	K. Turgeon, C. Turpin, I. Gregory-Eaves	https://doi.org/10.1139/cjfas-2017-0634	37	TURG2018	10	5	5	109	B	Temperate_coastal_rivers	Eastern_Hudson_Baie-Ungava	CANADA	52°39'48.4"N	76°22'10.9"W	52.6634	-76.3697	OPINACA	OPINACA	OP-EM400	HYDRO	UD	11.6	0.5	3.6	.	1040	569.91	730.09	0.64	L	1.49492	30000	8.2	1980	1982	2	16	A	7.625	0	1.426	0.733	Y	3.721	0.972	0
Boreal river impoundments caused nearshore fish community assemblage shifts but little change in diversity: A multi-scale analysis	Canadian Journal of Fisheries and Aquatic Sciences	2018	JOURNAL	K. Turgeon, C. Turpin, I. Gregory-Eaves	https://doi.org/10.1139/cjfas-2017-0635	37	TURG2018	10	6	6	109	B	Temperate_coastal_rivers	Eastern_Hudson_Baie-Ungava	CANADA	52°39'48.4"N	76°22'10.9"W	52.6634	-76.3697	OPINACA	OPINACA	OP-EM400	HYDRO	UD	11.6	0.5	3.6	.	1040	569.91	730.09	0.64	L	1.49492	30000	8.2	1980	1983	3	16	A	5.46667	0	1.394	0.866	Y	3.742	0.937	0
Boreal river impoundments caused nearshore fish community assemblage shifts but little change in diversity: A multi-scale analysis	Canadian Journal of Fisheries and Aquatic Sciences	2018	JOURNAL	K. Turgeon, C. Turpin, I. Gregory-Eaves	https://doi.org/10.1139/cjfas-2017-0636	37	TURG2018	10	7	7	109	B	Temperate_coastal_rivers	Eastern_Hudson_Baie-Ungava	CANADA	52°39'48.4"N	76°22'10.9"W	52.6634	-76.3697	OPINACA	OPINACA	OP-EM400	HYDRO	UD	11.6	0.5	3.6	.	1040	569.91	730.09	0.64	L	1.49492	30000	8.2	1980	1984	4	16	A	10.4667	0	1.295	0.666	Y	3.788	0.963	0
Boreal river impoundments caused nearshore fish community assemblage shifts but little change in diversity: A multi-scale analysis	Canadian Journal of Fisheries and Aquatic Sciences	2018	JOURNAL	K. Turgeon, C. Turpin, I. Gregory-Eaves	https://doi.org/10.1139/cjfas-2017-0637	37	TURG2018	10	8	8	109	B	Temperate_coastal_rivers	Eastern_Hudson_Baie-Ungava	CANADA	52°39'48.4"N	76°22'10.9"W	52.6634	-76.3697	OPINACA	OPINACA	OP-EM400	HYDRO	UD	11.6	0.5	3.6	.	1040	569.91	730.09	0.64	L	1.49492	30000	8.2	1980	1988	8	16	A	12.5	0	1.389	0.714	Y	3.747	0.985	0
Boreal river impoundments caused nearshore fish community assemblage shifts but little change in diversity: A multi-scale analysis	Canadian Journal of Fisheries and Aquatic Sciences	2018	JOURNAL	K. Turgeon, C. Turpin, I. Gregory-Eaves	https://doi.org/10.1139/cjfas-2017-0638	37	TURG2018	10	9	9	109	B	Temperate_coastal_rivers	Eastern_Hudson_Baie-Ungava	CANADA	52°39'48.4"N	76°22'10.9"W	52.6634	-76.3697	OPINACA	OPINACA	OP-EM400	HYDRO	UD	11.6	0.5	3.6	.	1040	569.91	730.09	0.64	L	1.49492	30000	8.2	1980	1992	12	16	A	9.98611	0	1.434	0.69	Y	3.691	0.982	0
Boreal river impoundments caused nearshore fish community assemblage shifts but little change in diversity: A multi-scale analysis	Canadian Journal of Fisheries and Aquatic Sciences	2018	JOURNAL	K. Turgeon, C. Turpin, I. Gregory-Eaves	https://doi.org/10.1139/cjfas-2017-0639	37	TURG2018	10	10	10	109	B	Temperate_coastal_rivers	Eastern_Hudson_Baie-Ungava	CANADA	52°39'48.4"N	76°22'10.9"W	52.6634	-76.3697	OPINACA	OPINACA	OP-EM400	HYDRO	UD	11.6	0.5	3.6	.	1040	569.91	730.09	0.64	L	1.49492	30000	8.2	1980	1996	16	16	A	9.99242	0	1.63	0.784	Y	3.654	0.965	0
Boreal river impoundments caused nearshore fish community assemblage shifts but little change in diversity: A multi-scale analysis	Canadian Journal of Fisheries and Aquatic Sciences	2018	JOURNAL	K. Turgeon, C. Turpin, I. Gregory-Eaves	https://doi.org/10.1139/cjfas-2017-0640	37	TURG2018	10	11	1	110	B	Temperate_coastal_rivers	Eastern_Hudson_Baie-Ungava	CANADA	52°39'48.4"N	76°22'10.9"W	52.6634	-76.3697	OPINACA	OPINACA	OP-EM401	HYDRO	UD	18.4	0.5	3.6	.	1040	569.91	730.09	0.64	L	1.49492	30000	8.2	1980	1978	-2	16	B	8	0	1.71	0.879	Y	3.587	0.93	0
Boreal river impoundments caused nearshore fish community assemblage shifts but little change in diversity: A multi-scale analysis	Canadian Journal of Fisheries and Aquatic Sciences	2018	JOURNAL	K. Turgeon, C. Turpin, I. Gregory-Eaves	https://doi.org/10.1139/cjfas-2017-0641	37	TURG2018	10	12	2	110	B	Temperate_coastal_rivers	Eastern_Hudson_Baie-Ungava	CANADA	52°39'48.4"N	76°22'10.9"W	52.6634	-76.3697	OPINACA	OPINACA	OP-EM401	HYDRO	UD	18.4	0.5	3.6	.	1040	569.91	730.09	0.64	L	1.49492	30000	8.2	1980	1979	-1	16	B	7.48485	0	1.782	0.857	Y	3.605	0.87	0
Boreal river impoundments caused nearshore fish community assemblage shifts but little change in diversity: A multi-scale analysis	Canadian Journal of Fisheries and Aquatic Sciences	2018	JOURNAL	K. Turgeon, C. Turpin, I. Gregory-Eaves	https://doi.org/10.1139/cjfas-2017-0642	37	TURG2018	10	13	3	110	B	Temperate_coastal_rivers	Eastern_Hudson_Baie-Ungava	CANADA	52°39'48.4"N	76°22'10.9"W	52.6634	-76.3697	OPINACA	OPINACA	OP-EM401	HYDRO	UD	18.4	0.5	3.6	.	1040	569.91	730.09	0.64	L	1.49492	30000	8.2	1980	1980	0	16	F	9.75	0	1.27	0.653	Y	3.755	0.962	0
Boreal river impoundments caused nearshore fish community assemblage shifts but little change in diversity: A multi-scale analysis	Canadian Journal of Fisheries and Aquatic Sciences	2018	JOURNAL	K. Turgeon, C. Turpin, I. Gregory-Eaves	https://doi.org/10.1139/cjfas-2017-0643	37	TURG2018	10	14	4	110	B	Temperate_coastal_rivers	Eastern_Hudson_Baie-Ungava	CANADA	52°39'48.4"N	76°22'10.9"W	52.6634	-76.3697	OPINACA	OPINACA	OP-EM401	HYDRO	UD	18.4	0.5	3.6	.	1040	569.91	730.09	0.64	L	1.49492	30000	8.2	1980	1981	1	16	A	7.98611	0	1.094	0.611	Y	3.773	0.944	0
Boreal river impoundments caused nearshore fish community assemblage shifts but little change in diversity: A multi-scale analysis	Canadian Journal of Fisheries and Aquatic Sciences	2018	JOURNAL	K. Turgeon, C. Turpin, I. Gregory-Eaves	https://doi.org/10.1139/cjfas-2017-0644	37	TURG2018	10	15	5	110	B	Temperate_coastal_rivers	Eastern_Hudson_Baie-Ungava	CANADA	52°39'48.4"N	76°22'10.9"W	52.6634	-76.3697	OPINACA	OPINACA	OP-EM401	HYDRO	UD	18.4	0.5	3.6	.	1040	569.91	730.09	0.64	L	1.49492	30000	8.2	1980	1982	2	16	A	6.46667	0	1.296	0.723	Y	3.648	0.978	0
Boreal river impoundments caused nearshore fish community assemblage shifts but little change in diversity: A multi-scale analysis	Canadian Journal of Fisheries and Aquatic Sciences	2018	JOURNAL	K. Turgeon, C. Turpin, I. Gregory-Eaves	https://doi.org/10.1139/cjfas-2017-0645	37	TURG2018	10	16	6	110	B	Temperate_coastal_rivers	Eastern_Hudson_Baie-Ungava	CANADA	52°39'48.4"N	76°22'10.9"W	52.6634	-76.3697	OPINACA	OPINACA	OP-EM401	HYDRO	UD	18.4	0.5	3.6	.	1040	569.91	730.09	0.64	L	1.49492	30000	8.2	1980	1983	3	16	A	7.96667	0	1.066	0.595	Y	3.715	0.993	0
Boreal river impoundments caused nearshore fish community assemblage shifts but little change in diversity: A multi-scale analysis	Canadian Journal of Fisheries and Aquatic Sciences	2018	JOURNAL	K. Turgeon, C. Turpin, I. Gregory-Eaves	https://doi.org/10.1139/cjfas-2017-0646	37	TURG2018	10	17	7	110	B	Temperate_coastal_rivers	Eastern_Hudson_Baie-Ungava	CANADA	52°39'48.4"N	76°22'10.9"W	52.6634	-76.3697	OPINACA	OPINACA	OP-EM401	HYDRO	UD	18.4	0.5	3.6	.	1040	569.91	730.09	0.64	L	1.49492	30000	8.2	1980	1984	4	16	A	11.9667	0	0.879	0.452	Y	3.564	0.994	0
Boreal river impoundments caused nearshore fish community assemblage shifts but little change in diversity: A multi-scale analysis	Canadian Journal of Fisheries and Aquatic Sciences	2018	JOURNAL	K. Turgeon, C. Turpin, I. Gregory-Eaves	https://doi.org/10.1139/cjfas-2017-0647	37	TURG2018	10	18	8	110	B	Temperate_coastal_rivers	Eastern_Hudson_Baie-Ungava	CANADA	52°39'48.4"N	76°22'10.9"W	52.6634	-76.3697	OPINACA	OPINACA	OP-EM401	HYDRO	UD	18.4	0.5	3.6	.	1040	569.91	730.09	0.64	L	1.49492	30000	8.2	1980	1988	8	16	A	7.5	0	1.205	0.749	Y	3.734	1	0
Boreal river impoundments caused nearshore fish community assemblage shifts but little change in diversity: A multi-scale analysis	Canadian Journal of Fisheries and Aquatic Sciences	2018	JOURNAL	K. Turgeon, C. Turpin, I. Gregory-Eaves	https://doi.org/10.1139/cjfas-2017-0648	37	TURG2018	10	19	9	110	B	Temperate_coastal_rivers	Eastern_Hudson_Baie-Ungava	CANADA	52°39'48.4"N	76°22'10.9"W	52.6634	-76.3697	OPINACA	OPINACA	OP-EM401	HYDRO	UD	18.4	0.5	3.6	.	1040	569.91	730.09	0.64	L	1.49492	30000	8.2	1980	1992	12	16	A	7.43333	0	1.399	0.781	Y	3.565	0.996	0
Boreal river impoundments caused nearshore fish community assemblage shifts but little change in diversity: A multi-scale analysis	Canadian Journal of Fisheries and Aquatic Sciences	2018	JOURNAL	K. Turgeon, C. Turpin, I. Gregory-Eaves	https://doi.org/10.1139/cjfas-2017-0649	37	TURG2018	10	20	10	110	B	Temperate_coastal_rivers	Eastern_Hudson_Baie-Ungava	CANADA	52°39'48.4"N	76°22'10.9"W	52.6634	-76.3697	OPINACA	OPINACA	OP-EM401	HYDRO	UD	18.4	0.5	3.6	.	1040	569.91	730.09	0.64	L	1.49492	30000	8.2	1980	1996	16	16	A	8.66667	0	1.456	0.812	Y	3.594	1	0
Boreal river impoundments caused nearshore fish community assemblage shifts but little change in diversity: A multi-scale analysis	Canadian Journal of Fisheries and Aquatic Sciences	2018	JOURNAL	K. Turgeon, C. Turpin, I. Gregory-Eaves	https://doi.org/10.1139/cjfas-2017-0650	37	TURG2018	10	21	1	111	B	Temperate_coastal_rivers	Eastern_Hudson_Baie-Ungava	CANADA	52°39'48.4"N	76°22'10.9"W	52.6634	-76.3697	OPINACA	OPINACA	OP-EM402	HYDRO	UD	44.2	0.5	3.6	.	1040	569.91	730.09	0.64	L	1.49492	30000	8.2	1980	1978	-2	16	B	10.9924	0	1.447	0.659	Y	3.421	0.775	0
Boreal river impoundments caused nearshore fish community assemblage shifts but little change in diversity: A multi-scale analysis	Canadian Journal of Fisheries and Aquatic Sciences	2018	JOURNAL	K. Turgeon, C. Turpin, I. Gregory-Eaves	https://doi.org/10.1139/cjfas-2017-0651	37	TURG2018	10	22	2	111	B	Temperate_coastal_rivers	Eastern_Hudson_Baie-Ungava	CANADA	52°39'48.4"N	76°22'10.9"W	52.6634	-76.3697	OPINACA	OPINACA	OP-EM402	HYDRO	UD	44.2	0.5	3.6	.	1040	569.91	730.09	0.64	L	1.49492	30000	8.2	1980	1979	-1	16	B	15	0	1.258	0.572	Y	3.368	0.892	0
Boreal river impoundments caused nearshore fish community assemblage shifts but little change in diversity: A multi-scale analysis	Canadian Journal of Fisheries and Aquatic Sciences	2018	JOURNAL	K. Turgeon, C. Turpin, I. Gregory-Eaves	https://doi.org/10.1139/cjfas-2017-0652	37	TURG2018	10	23	3	111	B	Temperate_coastal_rivers	Eastern_Hudson_Baie-Ungava	CANADA	52°39'48.4"N	76°22'10.9"W	52.6634	-76.3697	OPINACA	OPINACA	OP-EM402	HYDRO	UD	44.2	0.5	3.6	.	1040	569.91	730.09	0.64	L	1.49492	30000	8.2	1980	1980	0	16	F	18.6667	0	1.517	0.633	Y	3.371	0.778	0
Boreal river impoundments caused nearshore fish community assemblage shifts but little change in diversity: A multi-scale analysis	Canadian Journal of Fisheries and Aquatic Sciences	2018	JOURNAL	K. Turgeon, C. Turpin, I. Gregory-Eaves	https://doi.org/10.1139/cjfas-2017-0653	37	TURG2018	10	24	4	111	B	Temperate_coastal_rivers	Eastern_Hudson_Baie-Ungava	CANADA	52°39'48.4"N	76°22'10.9"W	52.6634	-76.3697	OPINACA	OPINACA	OP-EM402	HYDRO	UD	44.2	0.5	3.6	.	1040	569.91	730.09	0.64	L	1.49492	30000	8.2	1980	1981	1	16	A	15.7348	0	1.869	0.779	Y	3.54	0.787	0
Boreal river impoundments caused nearshore fish community assemblage shifts but little change in diversity: A multi-scale analysis	Canadian Journal of Fisheries and Aquatic Sciences	2018	JOURNAL	K. Turgeon, C. Turpin, I. Gregory-Eaves	https://doi.org/10.1139/cjfas-2017-0654	37	TURG2018	10	25	5	111	B	Temperate_coastal_rivers	Eastern_Hudson_Baie-Ungava	CANADA	52°39'48.4"N	76°22'10.9"W	52.6634	-76.3697	OPINACA	OPINACA	OP-EM402	HYDRO	UD	44.2	0.5	3.6	.	1040	569.91	730.09	0.64	L	1.49492	30000	8.2	1980	1982	2	16	A	10.6528	0	1.436	0.738	Y	3.625	0.762	0
Boreal river impoundments caused nearshore fish community assemblage shifts but little change in diversity: A multi-scale analysis	Canadian Journal of Fisheries and Aquatic Sciences	2018	JOURNAL	K. Turgeon, C. Turpin, I. Gregory-Eaves	https://doi.org/10.1139/cjfas-2017-0655	37	TURG2018	10	26	6	111	B	Temperate_coastal_rivers	Eastern_Hudson_Baie-Ungava	CANADA	52°39'48.4"N	76°22'10.9"W	52.6634	-76.3697	OPINACA	OPINACA	OP-EM402	HYDRO	UD	44.2	0.5	3.6	.	1040	569.91	730.09	0.64	L	1.49492	30000	8.2	1980	1983	3	16	A	13.9667	0	1.547	0.704	Y	3.633	0.845	0
Boreal river impoundments caused nearshore fish community assemblage shifts but little change in diversity: A multi-scale analysis	Canadian Journal of Fisheries and Aquatic Sciences	2018	JOURNAL	K. Turgeon, C. Turpin, I. Gregory-Eaves	https://doi.org/10.1139/cjfas-2017-0656	37	TURG2018	10	27	7	111	B	Temperate_coastal_rivers	Eastern_Hudson_Baie-Ungava	CANADA	52°39'48.4"N	76°22'10.9"W	52.6634	-76.3697	OPINACA	OPINACA	OP-EM402	HYDRO	UD	44.2	0.5	3.6	.	1040	569.91	730.09	0.64	L	1.49492	30000	8.2	1980	1984	4	16	A	5.71429	0	1.295	0.723	Y	3.667	0.983	0
Boreal river impoundments caused nearshore fish community assemblage shifts but little change in diversity: A multi-scale analysis	Canadian Journal of Fisheries and Aquatic Sciences	2018	JOURNAL	K. Turgeon, C. Turpin, I. Gregory-Eaves	https://doi.org/10.1139/cjfas-2017-0657	37	TURG2018	10	28	8	111	B	Temperate_coastal_rivers	Eastern_Hudson_Baie-Ungava	CANADA	52°39'48.4"N	76°22'10.9"W	52.6634	-76.3697	OPINACA	OPINACA	OP-EM402	HYDRO	UD	44.2	0.5	3.6	.	1040	569.91	730.09	0.64	L	1.49492	30000	8.2	1980	1988	8	16	A	11.5	0	0.905	0.505	Y	3.776	0.981	0
Boreal river impoundments caused nearshore fish community assemblage shifts but little change in diversity: A multi-scale analysis	Canadian Journal of Fisheries and Aquatic Sciences	2018	JOURNAL	K. Turgeon, C. Turpin, I. Gregory-Eaves	https://doi.org/10.1139/cjfas-2017-0658	37	TURG2018	10	29	9	111	B	Temperate_coastal_rivers	Eastern_Hudson_Baie-Ungava	CANADA	52°39'48.4"N	76°22'10.9"W	52.6634	-76.3697	OPINACA	OPINACA	OP-EM402	HYDRO	UD	44.2	0.5	3.6	.	1040	569.91	730.09	0.64	L	1.49492	30000	8.2	1980	1992	12	16	A	12.9667	0	1.726	0.83	Y	3.709	0.969	0
Boreal river impoundments caused nearshore fish community assemblage shifts but little change in diversity: A multi-scale analysis	Canadian Journal of Fisheries and Aquatic Sciences	2018	JOURNAL	K. Turgeon, C. Turpin, I. Gregory-Eaves	https://doi.org/10.1139/cjfas-2017-0659	37	TURG2018	10	30	10	111	B	Temperate_coastal_rivers	Eastern_Hudson_Baie-Ungava	CANADA	52°39'48.4"N	76°22'10.9"W	52.6634	-76.3697	OPINACA	OPINACA	OP-EM402	HYDRO	UD	44.2	0.5	3.6	.	1040	569.91	730.09	0.64	L	1.49492	30000	8.2	1980	1996	16	16	A	12.7424	0	1.627	0.741	Y	3.661	0.981	0
Boreal river impoundments caused nearshore fish community assemblage shifts but little change in diversity: A multi-scale analysis	Canadian Journal of Fisheries and Aquatic Sciences	2018	JOURNAL	K. Turgeon, C. Turpin, I. Gregory-Eaves	https://doi.org/10.1139/cjfas-2017-0660	37	TURG2018	11	31	1	112	B	Temperate_coastal_rivers	Eastern_Hudson_Baie-Ungava	CANADA	52°39'48.4"N	76°22'10.9"W	52.6634	-76.3697	OPINACA	OPINACA	OP-EM403	HYDRO	UD	13.5	0.5	3.6	.	1040	569.91	730.09	0.64	L	1.49492	30000	8.2	1980	1978	-2	16	B	11.7424	0	1.837	0.883	Y	3.652	0.83	0
Boreal river impoundments caused nearshore fish community assemblage shifts but little change in diversity: A multi-scale analysis	Canadian Journal of Fisheries and Aquatic Sciences	2018	JOURNAL	K. Turgeon, C. Turpin, I. Gregory-Eaves	https://doi.org/10.1139/cjfas-2017-0661	37	TURG2018	11	32	2	112	B	Temperate_coastal_rivers	Eastern_Hudson_Baie-Ungava	CANADA	52°39'48.4"N	76°22'10.9"W	52.6634	-76.3697	OPINACA	OPINACA	OP-EM403	HYDRO	UD	13.5	0.5	3.6	.	1040	569.91	730.09	0.64	L	1.49492	30000	8.2	1980	1979	-1	16	B	10.5	0	1.403	0.783	Y	3.574	0.412	0
Boreal river impoundments caused nearshore fish community assemblage shifts but little change in diversity: A multi-scale analysis	Canadian Journal of Fisheries and Aquatic Sciences	2018	JOURNAL	K. Turgeon, C. Turpin, I. Gregory-Eaves	https://doi.org/10.1139/cjfas-2017-0662	37	TURG2018	11	33	3	112	B	Temperate_coastal_rivers	Eastern_Hudson_Baie-Ungava	CANADA	52°39'48.4"N	76°22'10.9"W	52.6634	-76.3697	OPINACA	OPINACA	OP-EM403	HYDRO	UD	13.5	0.5	3.6	.	1040	569.91	730.09	0.64	L	1.49492	30000	8.2	1980	1980	0	16	F	11.5	0	1.725	0.887	Y	3.328	0.711	0
Boreal river impoundments caused nearshore fish community assemblage shifts but little change in diversity: A multi-scale analysis	Canadian Journal of Fisheries and Aquatic Sciences	2018	JOURNAL	K. Turgeon, C. Turpin, I. Gregory-Eaves	https://doi.org/10.1139/cjfas-2017-0663	37	TURG2018	11	34	4	112	B	Temperate_coastal_rivers	Eastern_Hudson_Baie-Ungava	CANADA	52°39'48.4"N	76°22'10.9"W	52.6634	-76.3697	OPINACA	OPINACA	OP-EM403	HYDRO	UD	13.5	0.5	3.6	.	1040	569.91	730.09	0.64	L	1.49492	30000	8.2	1980	1981	1	16	A	8.19048	0	2.129	1.024	Y	3.407	0.867	0
Boreal river impoundments caused nearshore fish community assemblage shifts but little change in diversity: A multi-scale analysis	Canadian Journal of Fisheries and Aquatic Sciences	2018	JOURNAL	K. Turgeon, C. Turpin, I. Gregory-Eaves	https://doi.org/10.1139/cjfas-2017-0664	37	TURG2018	11	35	5	112	B	Temperate_coastal_rivers	Eastern_Hudson_Baie-Ungava	CANADA	52°39'48.4"N	76°22'10.9"W	52.6634	-76.3697	OPINACA	OPINACA	OP-EM403	HYDRO	UD	13.5	0.5	3.6	.	1040	569.91	730.09	0.64	L	1.49492	30000	8.2	1980	1982	2	16	A	6.24242	0	1.681	0.938	Y	3.487	0.924	0
Boreal river impoundments caused nearshore fish community assemblage shifts but little change in diversity: A multi-scale analysis	Canadian Journal of Fisheries and Aquatic Sciences	2018	JOURNAL	K. Turgeon, C. Turpin, I. Gregory-Eaves	https://doi.org/10.1139/cjfas-2017-0665	37	TURG2018	11	36	6	112	B	Temperate_coastal_rivers	Eastern_Hudson_Baie-Ungava	CANADA	52°39'48.4"N	76°22'10.9"W	52.6634	-76.3697	OPINACA	OPINACA	OP-EM403	HYDRO	UD	13.5	0.5	3.6	.	1040	569.91	730.09	0.64	L	1.49492	30000	8.2	1980	1983	3	16	A	9.96429	0	1.365	0.701	Y	3.646	0.944	0
Boreal river impoundments caused nearshore fish community assemblage shifts but little change in diversity: A multi-scale analysis	Canadian Journal of Fisheries and Aquatic Sciences	2018	JOURNAL	K. Turgeon, C. Turpin, I. Gregory-Eaves	https://doi.org/10.1139/cjfas-2017-0666	37	TURG2018	11	37	7	112	B	Temperate_coastal_rivers	Eastern_Hudson_Baie-Ungava	CANADA	52°39'48.4"N	76°22'10.9"W	52.6634	-76.3697	OPINACA	OPINACA	OP-EM403	HYDRO	UD	13.5	0.5	3.6	.	1040	569.91	730.09	0.64	L	1.49492	30000	8.2	1980	1984	4	16	A	9.46667	0	1.08	0.603	Y	3.755	0.938	0
Boreal river impoundments caused nearshore fish community assemblage shifts but little change in diversity: A multi-scale analysis	Canadian Journal of Fisheries and Aquatic Sciences	2018	JOURNAL	K. Turgeon, C. Turpin, I. Gregory-Eaves	https://doi.org/10.1139/cjfas-2017-0667	37	TURG2018	11	38	8	112	B	Temperate_coastal_rivers	Eastern_Hudson_Baie-Ungava	CANADA	52°39'48.4"N	76°22'10.9"W	52.6634	-76.3697	OPINACA	OPINACA	OP-EM403	HYDRO	UD	13.5	0.5	3.6	.	1040	569.91	730.09	0.64	L	1.49492	30000	8.2	1980	1988	8	16	A	2.93333	0	1.007	0.916	Y	3.63	1	0
Boreal river impoundments caused nearshore fish community assemblage shifts but little change in diversity: A multi-scale analysis	Canadian Journal of Fisheries and Aquatic Sciences	2018	JOURNAL	K. Turgeon, C. Turpin, I. Gregory-Eaves	https://doi.org/10.1139/cjfas-2017-0668	37	TURG2018	11	39	9	112	B	Temperate_coastal_rivers	Eastern_Hudson_Baie-Ungava	CANADA	52°39'48.4"N	76°22'10.9"W	52.6634	-76.3697	OPINACA	OPINACA	OP-EM403	HYDRO	UD	13.5	0.5	3.6	.	1040	569.91	730.09	0.64	L	1.49492	30000	8.2	1980	1990	10	16	A	6.95	0	1.598	0.993	Y	3.426	1	0
Boreal river impoundments caused nearshore fish community assemblage shifts but little change in diversity: A multi-scale analysis	Canadian Journal of Fisheries and Aquatic Sciences	2018	JOURNAL	K. Turgeon, C. Turpin, I. Gregory-Eaves	https://doi.org/10.1139/cjfas-2017-0669	37	TURG2018	11	40	10	112	B	Temperate_coastal_rivers	Eastern_Hudson_Baie-Ungava	CANADA	52°39'48.4"N	76°22'10.9"W	52.6634	-76.3697	OPINACA	OPINACA	OP-EM403	HYDRO	UD	13.5	0.5	3.6	.	1040	569.91	730.09	0.64	L	1.49492	30000	8.2	1980	1992	12	16	A	10	0	1.535	0.856	Y	3.287	0.975	0
Boreal river impoundments caused nearshore fish community assemblage shifts but little change in diversity: A multi-scale analysis	Canadian Journal of Fisheries and Aquatic Sciences	2018	JOURNAL	K. Turgeon, C. Turpin, I. Gregory-Eaves	https://doi.org/10.1139/cjfas-2017-0670	37	TURG2018	11	41	11	112	B	Temperate_coastal_rivers	Eastern_Hudson_Baie-Ungava	CANADA	52°39'48.4"N	76°22'10.9"W	52.6634	-76.3697	OPINACA	OPINACA	OP-EM403	HYDRO	UD	13.5	0.5	3.6	.	1040	569.91	730.09	0.64	L	1.49492	30000	8.2	1980	1996	16	16	A	12.2321	0	1.583	0.814	Y	3.591	0.909	0
Boreal river impoundments caused nearshore fish community assemblage shifts but little change in diversity: A multi-scale analysis	Canadian Journal of Fisheries and Aquatic Sciences	2018	JOURNAL	K. Turgeon, C. Turpin, I. Gregory-Eaves	https://doi.org/10.1139/cjfas-2017-0671	37	TURG2018	10	42	1	113	B	Temperate_coastal_rivers	Eastern_Hudson_Baie-Ungava	CANADA	52°39'48.4"N	76°22'10.9"W	52.6634	-76.3697	OPINACA	OPINACA	OP-EA300	HYDRO	D	77.8	0.5	3.6	.	1040	569.91	730.09	0.64	L	1.49492	30000	8.2	1980	1978	-2	16	B	14.9667	0	1.938	0.842	Y	3.458	0.591	0
Boreal river impoundments caused nearshore fish community assemblage shifts but little change in diversity: A multi-scale analysis	Canadian Journal of Fisheries and Aquatic Sciences	2018	JOURNAL	K. Turgeon, C. Turpin, I. Gregory-Eaves	https://doi.org/10.1139/cjfas-2017-0672	37	TURG2018	10	43	2	113	B	Temperate_coastal_rivers	Eastern_Hudson_Baie-Ungava	CANADA	52°39'48.4"N	76°22'10.9"W	52.6634	-76.3697	OPINACA	OPINACA	OP-EA300	HYDRO	D	193.1	0.5	3.6	.	1040	569.91	730.09	0.64	L	1.49492	30000	8.2	1980	1979	-1	16	B	9.72727	0	1.621	0.833	Y	3.412	0.382	0
Boreal river impoundments caused nearshore fish community assemblage shifts but little change in diversity: A multi-scale analysis	Canadian Journal of Fisheries and Aquatic Sciences	2018	JOURNAL	K. Turgeon, C. Turpin, I. Gregory-Eaves	https://doi.org/10.1139/cjfas-2017-0673	37	TURG2018	10	44	3	113	B	Temperate_coastal_rivers	Eastern_Hudson_Baie-Ungava	CANADA	52°39'48.4"N	76°22'10.9"W	52.6634	-76.3697	OPINACA	OPINACA	OP-EA300	HYDRO	D	193.1	0.5	3.6	.	1040	569.91	730.09	0.64	L	1.49492	30000	8.2	1980	1980	0	16	F	9.48485	0	1.8	0.782	Y	3.342	0.545	0
Boreal river impoundments caused nearshore fish community assemblage shifts but little change in diversity: A multi-scale analysis	Canadian Journal of Fisheries and Aquatic Sciences	2018	JOURNAL	K. Turgeon, C. Turpin, I. Gregory-Eaves	https://doi.org/10.1139/cjfas-2017-0674	37	TURG2018	10	45	4	113	B	Temperate_coastal_rivers	Eastern_Hudson_Baie-Ungava	CANADA	52°39'48.4"N	76°22'10.9"W	52.6634	-76.3697	OPINACA	OPINACA	OP-EA300	HYDRO	D	193.1	0.5	3.6	.	1040	569.91	730.09	0.64	L	1.49492	30000	8.2	1980	1981	1	16	A	13.4667	0	1.657	0.72	Y	3.427	0.385	0
Boreal river impoundments caused nearshore fish community assemblage shifts but little change in diversity: A multi-scale analysis	Canadian Journal of Fisheries and Aquatic Sciences	2018	JOURNAL	K. Turgeon, C. Turpin, I. Gregory-Eaves	https://doi.org/10.1139/cjfas-2017-0675	37	TURG2018	10	46	5	113	B	Temperate_coastal_rivers	Eastern_Hudson_Baie-Ungava	CANADA	52°39'48.4"N	76°22'10.9"W	52.6634	-76.3697	OPINACA	OPINACA	OP-EA300	HYDRO	D	193.1	0.5	3.6	.	1040	569.91	730.09	0.64	L	1.49492	30000	8.2	1980	1982	2	16	A	17.2424	0	1.631	0.708	Y	3.314	0.548	0
Boreal river impoundments caused nearshore fish community assemblage shifts but little change in diversity: A multi-scale analysis	Canadian Journal of Fisheries and Aquatic Sciences	2018	JOURNAL	K. Turgeon, C. Turpin, I. Gregory-Eaves	https://doi.org/10.1139/cjfas-2017-0676	37	TURG2018	10	47	6	113	B	Temperate_coastal_rivers	Eastern_Hudson_Baie-Ungava	CANADA	52°39'48.4"N	76°22'10.9"W	52.6634	-76.3697	OPINACA	OPINACA	OP-EA300	HYDRO	D	193.1	0.5	3.6	.	1040	569.91	730.09	0.64	L	1.49492	30000	8.2	1980	1983	3	16	A	10.6528	0	1.657	0.852	Y	3.295	0.59	0
Boreal river impoundments caused nearshore fish community assemblage shifts but little change in diversity: A multi-scale analysis	Canadian Journal of Fisheries and Aquatic Sciences	2018	JOURNAL	K. Turgeon, C. Turpin, I. Gregory-Eaves	https://doi.org/10.1139/cjfas-2017-0677	37	TURG2018	10	48	7	113	B	Temperate_coastal_rivers	Eastern_Hudson_Baie-Ungava	CANADA	52°39'48.4"N	76°22'10.9"W	52.6634	-76.3697	OPINACA	OPINACA	OP-EA300	HYDRO	D	193.1	0.5	3.6	.	1040	569.91	730.09	0.64	L	1.49492	30000	8.2	1980	1984	4	16	A	7.30556	0	1.629	0.909	Y	3.376	0.581	0
Boreal river impoundments caused nearshore fish community assemblage shifts but little change in diversity: A multi-scale analysis	Canadian Journal of Fisheries and Aquatic Sciences	2018	JOURNAL	K. Turgeon, C. Turpin, I. Gregory-Eaves	https://doi.org/10.1139/cjfas-2017-0678	37	TURG2018	10	49	8	113	B	Temperate_coastal_rivers	Eastern_Hudson_Baie-Ungava	CANADA	52°39'48.4"N	76°22'10.9"W	52.6634	-76.3697	OPINACA	OPINACA	OP-EA300	HYDRO	D	193.1	0.5	3.6	.	1040	569.91	730.09	0.64	L	1.49492	30000	8.2	1980	1988	8	16	A	13.5	0	1.894	0.911	Y	3.415	0.767	0
Boreal river impoundments caused nearshore fish community assemblage shifts but little change in diversity: A multi-scale analysis	Canadian Journal of Fisheries and Aquatic Sciences	2018	JOURNAL	K. Turgeon, C. Turpin, I. Gregory-Eaves	https://doi.org/10.1139/cjfas-2017-0679	37	TURG2018	10	50	9	113	B	Temperate_coastal_rivers	Eastern_Hudson_Baie-Ungava	CANADA	52°39'48.4"N	76°22'10.9"W	52.6634	-76.3697	OPINACA	OPINACA	OP-EA300	HYDRO	D	193.1	0.5	3.6	.	1040	569.91	730.09	0.64	L	1.49492	30000	8.2	1980	1992	12	16	A	12.9667	0	1.633	0.785	Y	3.388	0.588	0
Boreal river impoundments caused nearshore fish community assemblage shifts but little change in diversity: A multi-scale analysis	Canadian Journal of Fisheries and Aquatic Sciences	2018	JOURNAL	K. Turgeon, C. Turpin, I. Gregory-Eaves	https://doi.org/10.1139/cjfas-2017-0680	37	TURG2018	10	51	10	113	B	Temperate_coastal_rivers	Eastern_Hudson_Baie-Ungava	CANADA	52°39'48.4"N	76°22'10.9"W	52.6634	-76.3697	OPINACA	OPINACA	OP-EA300	HYDRO	D	193.1	0.5	3.6	.	1040	569.91	730.09	0.64	L	1.49492	30000	8.2	1980	1996	16	16	A	14.7424	0	2.154	0.898	Y	3.327	0.736	0
Boreal river impoundments caused nearshore fish community assemblage shifts but little change in diversity: A multi-scale analysis	Canadian Journal of Fisheries and Aquatic Sciences	2018	JOURNAL	K. Turgeon, C. Turpin, I. Gregory-Eaves	https://doi.org/10.1139/cjfas-2017-0681	37	TURG2018	10	52	1	114	B	Temperate_coastal_rivers	Eastern_Hudson_Baie-Ungava	CANADA	52°39'48.4"N	76°22'10.9"W	52.6634	-76.3697	OPINACA	OPINACA	OP-EA301	HYDRO	D	77.8	0.5	3.6	.	1040	569.91	730.09	0.64	L	1.49492	30000	8.2	1980	1978	-2	16	B	10.6667	0	1.716	0.825	Y	3.555	0.558	0
Boreal river impoundments caused nearshore fish community assemblage shifts but little change in diversity: A multi-scale analysis	Canadian Journal of Fisheries and Aquatic Sciences	2018	JOURNAL	K. Turgeon, C. Turpin, I. Gregory-Eaves	https://doi.org/10.1139/cjfas-2017-0682	37	TURG2018	10	53	2	114	B	Temperate_coastal_rivers	Eastern_Hudson_Baie-Ungava	CANADA	52°39'48.4"N	76°22'10.9"W	52.6634	-76.3697	OPINACA	OPINACA	OP-EA301	HYDRO	D	77.8	0.5	3.6	.	1040	569.91	730.09	0.64	L	1.49492	30000	8.2	1980	1979	-1	16	B	12.3333	0	1.242	0.597	Y	3.425	0.254	0
Boreal river impoundments caused nearshore fish community assemblage shifts but little change in diversity: A multi-scale analysis	Canadian Journal of Fisheries and Aquatic Sciences	2018	JOURNAL	K. Turgeon, C. Turpin, I. Gregory-Eaves	https://doi.org/10.1139/cjfas-2017-0683	37	TURG2018	10	54	3	114	B	Temperate_coastal_rivers	Eastern_Hudson_Baie-Ungava	CANADA	52°39'48.4"N	76°22'10.9"W	52.6634	-76.3697	OPINACA	OPINACA	OP-EA301	HYDRO	D	77.8	0.5	3.6	.	1040	569.91	730.09	0.64	L	1.49492	30000	8.2	1980	1980	0	16	F	15.3194	0	0.914	0.397	Y	3.476	0.195	0
Boreal river impoundments caused nearshore fish community assemblage shifts but little change in diversity: A multi-scale analysis	Canadian Journal of Fisheries and Aquatic Sciences	2018	JOURNAL	K. Turgeon, C. Turpin, I. Gregory-Eaves	https://doi.org/10.1139/cjfas-2017-0684	37	TURG2018	10	55	4	114	B	Temperate_coastal_rivers	Eastern_Hudson_Baie-Ungava	CANADA	52°39'48.4"N	76°22'10.9"W	52.6634	-76.3697	OPINACA	OPINACA	OP-EA301	HYDRO	D	77.8	0.5	3.6	.	1040	569.91	730.09	0.64	L	1.49492	30000	8.2	1980	1981	1	16	A	10.9	0	1.558	0.677	Y	3.516	0.405	0
Boreal river impoundments caused nearshore fish community assemblage shifts but little change in diversity: A multi-scale analysis	Canadian Journal of Fisheries and Aquatic Sciences	2018	JOURNAL	K. Turgeon, C. Turpin, I. Gregory-Eaves	https://doi.org/10.1139/cjfas-2017-0685	37	TURG2018	10	56	5	114	B	Temperate_coastal_rivers	Eastern_Hudson_Baie-Ungava	CANADA	52°39'48.4"N	76°22'10.9"W	52.6634	-76.3697	OPINACA	OPINACA	OP-EA301	HYDRO	D	77.8	0.5	3.6	.	1040	569.91	730.09	0.64	L	1.49492	30000	8.2	1980	1982	2	16	A	20.4821	0	1.452	0.584	Y	3.479	0.336	0
Boreal river impoundments caused nearshore fish community assemblage shifts but little change in diversity: A multi-scale analysis	Canadian Journal of Fisheries and Aquatic Sciences	2018	JOURNAL	K. Turgeon, C. Turpin, I. Gregory-Eaves	https://doi.org/10.1139/cjfas-2017-0686	37	TURG2018	10	57	6	114	B	Temperate_coastal_rivers	Eastern_Hudson_Baie-Ungava	CANADA	52°39'48.4"N	76°22'10.9"W	52.6634	-76.3697	OPINACA	OPINACA	OP-EA301	HYDRO	D	77.8	0.5	3.6	.	1040	569.91	730.09	0.64	L	1.49492	30000	8.2	1980	1983	3	16	A	23	0	1.669	0.672	Y	3.486	0.383	0
Boreal river impoundments caused nearshore fish community assemblage shifts but little change in diversity: A multi-scale analysis	Canadian Journal of Fisheries and Aquatic Sciences	2018	JOURNAL	K. Turgeon, C. Turpin, I. Gregory-Eaves	https://doi.org/10.1139/cjfas-2017-0687	37	TURG2018	10	58	7	114	B	Temperate_coastal_rivers	Eastern_Hudson_Baie-Ungava	CANADA	52°39'48.4"N	76°22'10.9"W	52.6634	-76.3697	OPINACA	OPINACA	OP-EA301	HYDRO	D	77.8	0.5	3.6	.	1040	569.91	730.09	0.64	L	1.49492	30000	8.2	1980	1984	4	16	A	16.4667	0	1.432	0.622	Y	3.448	0.327	0
Boreal river impoundments caused nearshore fish community assemblage shifts but little change in diversity: A multi-scale analysis	Canadian Journal of Fisheries and Aquatic Sciences	2018	JOURNAL	K. Turgeon, C. Turpin, I. Gregory-Eaves	https://doi.org/10.1139/cjfas-2017-0688	37	TURG2018	10	59	8	114	B	Temperate_coastal_rivers	Eastern_Hudson_Baie-Ungava	CANADA	52°39'48.4"N	76°22'10.9"W	52.6634	-76.3697	OPINACA	OPINACA	OP-EA301	HYDRO	D	77.8	0.5	3.6	.	1040	569.91	730.09	0.64	L	1.49492	30000	8.2	1980	1988	8	16	A	8.5	0	1.646	0.918	Y	3.411	0.588	0
Boreal river impoundments caused nearshore fish community assemblage shifts but little change in diversity: A multi-scale analysis	Canadian Journal of Fisheries and Aquatic Sciences	2018	JOURNAL	K. Turgeon, C. Turpin, I. Gregory-Eaves	https://doi.org/10.1139/cjfas-2017-0689	37	TURG2018	10	60	9	114	B	Temperate_coastal_rivers	Eastern_Hudson_Baie-Ungava	CANADA	52°39'48.4"N	76°22'10.9"W	52.6634	-76.3697	OPINACA	OPINACA	OP-EA301	HYDRO	D	77.8	0.5	3.6	.	1040	569.91	730.09	0.64	L	1.49492	30000	8.2	1980	1992	12	16	A	8.4	0	1.794	0.816	Y	3.404	0.665	0
Boreal river impoundments caused nearshore fish community assemblage shifts but little change in diversity: A multi-scale analysis	Canadian Journal of Fisheries and Aquatic Sciences	2018	JOURNAL	K. Turgeon, C. Turpin, I. Gregory-Eaves	https://doi.org/10.1139/cjfas-2017-0690	37	TURG2018	10	61	10	114	B	Temperate_coastal_rivers	Eastern_Hudson_Baie-Ungava	CANADA	52°39'48.4"N	76°22'10.9"W	52.6634	-76.3697	OPINACA	OPINACA	OP-EA301	HYDRO	D	77.8	0.5	3.6	.	1040	569.91	730.09	0.64	L	1.49492	30000	8.2	1980	1996	16	16	A	11.2348	0	1.85	0.804	Y	3.389	0.783	0
Boreal river impoundments caused nearshore fish community assemblage shifts but little change in diversity: A multi-scale analysis	Canadian Journal of Fisheries and Aquatic Sciences	2018	JOURNAL	K. Turgeon, C. Turpin, I. Gregory-Eaves	https://doi.org/10.1139/cjfas-2017-0691	37	TURG2018	7	1	1	115	B	Temperate_coastal_rivers	Eastern_Hudson_Baie-Ungava	CANADA	54°09'27.0"N	69°50'44.0"W	54.1575	-69.8456	CANIAPISCAU	CANIAPISCAU	CA-CA411	HYDRO	UD	103	2	2.1	.	4275	845	3430	0.8	D	1.3347	36000	12	1982	1980	-2	17	B	8.24242	0	1.245	0.599	Y	3.871	0.963	0
Boreal river impoundments caused nearshore fish community assemblage shifts but little change in diversity: A multi-scale analysis	Canadian Journal of Fisheries and Aquatic Sciences	2018	JOURNAL	K. Turgeon, C. Turpin, I. Gregory-Eaves	https://doi.org/10.1139/cjfas-2017-0692	37	TURG2018	7	2	2	115	B	Temperate_coastal_rivers	Eastern_Hudson_Baie-Ungava	CANADA	54°09'27.0"N	69°50'44.0"W	54.1575	-69.8456	CANIAPISCAU	CANIAPISCAU	CA-CA411	HYDRO	UD	103	2	2.1	.	4275	845	3430	0.8	D	1.3347	36000	12	1982	1981	-1	17	B	8.24242	0	1.307	0.628	Y	3.82	0.889	0
Boreal river impoundments caused nearshore fish community assemblage shifts but little change in diversity: A multi-scale analysis	Canadian Journal of Fisheries and Aquatic Sciences	2018	JOURNAL	K. Turgeon, C. Turpin, I. Gregory-Eaves	https://doi.org/10.1139/cjfas-2017-0693	37	TURG2018	7	3	3	115	B	Temperate_coastal_rivers	Eastern_Hudson_Baie-Ungava	CANADA	54°09'27.0"N	69°50'44.0"W	54.1575	-69.8456	CANIAPISCAU	CANIAPISCAU	CA-CA411	HYDRO	UD	103	2	2.1	.	4275	845	3430	0.8	D	1.3347	36000	12	1982	1982	0	17	F	8.31944	0	1.769	0.851	Y	3.545	0.844	0
Boreal river impoundments caused nearshore fish community assemblage shifts but little change in diversity: A multi-scale analysis	Canadian Journal of Fisheries and Aquatic Sciences	2018	JOURNAL	K. Turgeon, C. Turpin, I. Gregory-Eaves	https://doi.org/10.1139/cjfas-2017-0694	37	TURG2018	7	4	4	115	B	Temperate_coastal_rivers	Eastern_Hudson_Baie-Ungava	CANADA	54°09'27.0"N	69°50'44.0"W	54.1575	-69.8456	CANIAPISCAU	CANIAPISCAU	CA-CA411	HYDRO	UD	103	2	2.1	.	4275	845	3430	0.8	D	1.3347	36000	12	1982	1987	5	17	A	7.43333	0	1.316	0.734	Y	3.72	0.993	0
Boreal river impoundments caused nearshore fish community assemblage shifts but little change in diversity: A multi-scale analysis	Canadian Journal of Fisheries and Aquatic Sciences	2018	JOURNAL	K. Turgeon, C. Turpin, I. Gregory-Eaves	https://doi.org/10.1139/cjfas-2017-0695	37	TURG2018	7	5	5	115	B	Temperate_coastal_rivers	Eastern_Hudson_Baie-Ungava	CANADA	54°09'27.0"N	69°50'44.0"W	54.1575	-69.8456	CANIAPISCAU	CANIAPISCAU	CA-CA411	HYDRO	UD	103	2	2.1	.	4275	845	3430	0.8	D	1.3347	36000	12	1982	1991	9	17	A	10	0	0.792	0.442	Y	3.8	0.997	0
Boreal river impoundments caused nearshore fish community assemblage shifts but little change in diversity: A multi-scale analysis	Canadian Journal of Fisheries and Aquatic Sciences	2018	JOURNAL	K. Turgeon, C. Turpin, I. Gregory-Eaves	https://doi.org/10.1139/cjfas-2017-0696	37	TURG2018	7	6	6	115	B	Temperate_coastal_rivers	Eastern_Hudson_Baie-Ungava	CANADA	54°09'27.0"N	69°50'44.0"W	54.1575	-69.8456	CANIAPISCAU	CANIAPISCAU	CA-CA411	HYDRO	UD	103	2	2.1	.	4275	845	3430	0.8	D	1.3347	36000	12	1982	1993	11	17	A	8	0	1.526	0.784	Y	3.546	1	0
Boreal river impoundments caused nearshore fish community assemblage shifts but little change in diversity: A multi-scale analysis	Canadian Journal of Fisheries and Aquatic Sciences	2018	JOURNAL	K. Turgeon, C. Turpin, I. Gregory-Eaves	https://doi.org/10.1139/cjfas-2017-0697	37	TURG2018	7	7	7	115	B	Temperate_coastal_rivers	Eastern_Hudson_Baie-Ungava	CANADA	54°09'27.0"N	69°50'44.0"W	54.1575	-69.8456	CANIAPISCAU	CANIAPISCAU	CA-CA411	HYDRO	UD	103	2	2.1	.	4275	845	3430	0.8	D	1.3347	36000	12	1982	1999	17	17	A	10.4	0	1.821	0.876	Y	3.448	0.977	0
Boreal river impoundments caused nearshore fish community assemblage shifts but little change in diversity: A multi-scale analysis	Canadian Journal of Fisheries and Aquatic Sciences	2018	JOURNAL	K. Turgeon, C. Turpin, I. Gregory-Eaves	https://doi.org/10.1139/cjfas-2017-0698	37	TURG2018	7	8	1	116	B	Temperate_coastal_rivers	Eastern_Hudson_Baie-Ungava	CANADA	54°09'27.0"N	69°50'44.0"W	54.1575	-69.8456	CANIAPISCAU	CANIAPISCAU	CA-CA413	HYDRO	UD	148	2	2.1	.	4275	845	3430	0.8	D	1.3347	36000	12	1982	1980	-2	17	B	4	0	1.155	1.051	Y	3.705	1	0
Boreal river impoundments caused nearshore fish community assemblage shifts but little change in diversity: A multi-scale analysis	Canadian Journal of Fisheries and Aquatic Sciences	2018	JOURNAL	K. Turgeon, C. Turpin, I. Gregory-Eaves	https://doi.org/10.1139/cjfas-2017-0699	37	TURG2018	7	9	2	116	B	Temperate_coastal_rivers	Eastern_Hudson_Baie-Ungava	CANADA	54°09'27.0"N	69°50'44.0"W	54.1575	-69.8456	CANIAPISCAU	CANIAPISCAU	CA-CA413	HYDRO	UD	148	2	2.1	.	4275	845	3430	0.8	D	1.3347	36000	12	1982	1981	-1	17	B	14.6667	0	1.149	0.591	Y	3.758	0.991	0
Boreal river impoundments caused nearshore fish community assemblage shifts but little change in diversity: A multi-scale analysis	Canadian Journal of Fisheries and Aquatic Sciences	2018	JOURNAL	K. Turgeon, C. Turpin, I. Gregory-Eaves	https://doi.org/10.1139/cjfas-2017-0700	37	TURG2018	7	10	3	116	B	Temperate_coastal_rivers	Eastern_Hudson_Baie-Ungava	CANADA	54°09'27.0"N	69°50'44.0"W	54.1575	-69.8456	CANIAPISCAU	CANIAPISCAU	CA-CA413	HYDRO	UD	148	2	2.1	.	4275	845	3430	0.8	D	1.3347	36000	12	1982	1982	0	17	F	7.83333	0	1.105	0.687	Y	3.794	1	0
Boreal river impoundments caused nearshore fish community assemblage shifts but little change in diversity: A multi-scale analysis	Canadian Journal of Fisheries and Aquatic Sciences	2018	JOURNAL	K. Turgeon, C. Turpin, I. Gregory-Eaves	https://doi.org/10.1139/cjfas-2017-0701	37	TURG2018	7	11	4	116	B	Temperate_coastal_rivers	Eastern_Hudson_Baie-Ungava	CANADA	54°09'27.0"N	69°50'44.0"W	54.1575	-69.8456	CANIAPISCAU	CANIAPISCAU	CA-CA413	HYDRO	UD	148	2	2.1	.	4275	845	3430	0.8	D	1.3347	36000	12	1982	1987	5	17	A	6.63889	0	1.575	0.809	Y	3.549	0.972	0
Boreal river impoundments caused nearshore fish community assemblage shifts but little change in diversity: A multi-scale analysis	Canadian Journal of Fisheries and Aquatic Sciences	2018	JOURNAL	K. Turgeon, C. Turpin, I. Gregory-Eaves	https://doi.org/10.1139/cjfas-2017-0702	37	TURG2018	7	12	5	116	B	Temperate_coastal_rivers	Eastern_Hudson_Baie-Ungava	CANADA	54°09'27.0"N	69°50'44.0"W	54.1575	-69.8456	CANIAPISCAU	CANIAPISCAU	CA-CA413	HYDRO	UD	148	2	2.1	.	4275	845	3430	0.8	D	1.3347	36000	12	1982	1991	9	17	A	5.83333	0	1.316	0.949	Y	3.573	1	0
Boreal river impoundments caused nearshore fish community assemblage shifts but little change in diversity: A multi-scale analysis	Canadian Journal of Fisheries and Aquatic Sciences	2018	JOURNAL	K. Turgeon, C. Turpin, I. Gregory-Eaves	https://doi.org/10.1139/cjfas-2017-0703	37	TURG2018	7	13	6	116	B	Temperate_coastal_rivers	Eastern_Hudson_Baie-Ungava	CANADA	54°09'27.0"N	69°50'44.0"W	54.1575	-69.8456	CANIAPISCAU	CANIAPISCAU	CA-CA413	HYDRO	UD	148	2	2.1	.	4275	845	3430	0.8	D	1.3347	36000	12	1982	1993	11	17	A	10.6667	0	1.824	0.877	Y	3.285	1	0
Boreal river impoundments caused nearshore fish community assemblage shifts but little change in diversity: A multi-scale analysis	Canadian Journal of Fisheries and Aquatic Sciences	2018	JOURNAL	K. Turgeon, C. Turpin, I. Gregory-Eaves	https://doi.org/10.1139/cjfas-2017-0704	37	TURG2018	7	14	7	116	B	Temperate_coastal_rivers	Eastern_Hudson_Baie-Ungava	CANADA	54°09'27.0"N	69°50'44.0"W	54.1575	-69.8456	CANIAPISCAU	CANIAPISCAU	CA-CA413	HYDRO	UD	148	2	2.1	.	4275	845	3430	0.8	D	1.3347	36000	12	1982	1999	17	17	A	8.36667	0	1.735	0.834	Y	3.512	0.98	0
Boreal river impoundments caused nearshore fish community assemblage shifts but little change in diversity: A multi-scale analysis	Canadian Journal of Fisheries and Aquatic Sciences	2018	JOURNAL	K. Turgeon, C. Turpin, I. Gregory-Eaves	https://doi.org/10.1139/cjfas-2017-0705	37	TURG2018	2	15	1	117	B	Temperate_coastal_rivers	Eastern_Hudson_Baie-Ungava	CANADA	54°09'27.0"N	69°50'44.0"W	54.1575	-69.8456	CANIAPISCAU	CANIAPISCAU	CA-CA414	HYDRO	UD	110	2	2.1	.	4275	845	3430	0.8	D	1.3347	36000	12	1982	1980	-2	17	B	14.4924	0	1.383	0.63	Y	3.823	0.96	0
Boreal river impoundments caused nearshore fish community assemblage shifts but little change in diversity: A multi-scale analysis	Canadian Journal of Fisheries and Aquatic Sciences	2018	JOURNAL	K. Turgeon, C. Turpin, I. Gregory-Eaves	https://doi.org/10.1139/cjfas-2017-0706	37	TURG2018	2	16	2	117	B	Temperate_coastal_rivers	Eastern_Hudson_Baie-Ungava	CANADA	54°09'27.0"N	69°50'44.0"W	54.1575	-69.8456	CANIAPISCAU	CANIAPISCAU	CA-CA414	HYDRO	UD	110	2	2.1	.	4275	845	3430	0.8	D	1.3347	36000	12	1982	1981	-1	17	B	7.24242	0	1.402	0.721	Y	3.699	0.984	0
Boreal river impoundments caused nearshore fish community assemblage shifts but little change in diversity: A multi-scale analysis	Canadian Journal of Fisheries and Aquatic Sciences	2018	JOURNAL	K. Turgeon, C. Turpin, I. Gregory-Eaves	https://doi.org/10.1139/cjfas-2017-0707	37	TURG2018	3	17	1	118	B	Temperate_coastal_rivers	Eastern_Hudson_Baie-Ungava	CANADA	54°09'27.0"N	69°50'44.0"W	54.1575	-69.8456	CANIAPISCAU	CANIAPISCAU	CA-CA415	HYDRO	UD	73.6	2	2.1	.	4275	845	3430	0.8	D	1.3347	36000	12	1982	1980	-2	17	B	8.47727	0	1.535	0.738	Y	3.522	0.964	0
Boreal river impoundments caused nearshore fish community assemblage shifts but little change in diversity: A multi-scale analysis	Canadian Journal of Fisheries and Aquatic Sciences	2018	JOURNAL	K. Turgeon, C. Turpin, I. Gregory-Eaves	https://doi.org/10.1139/cjfas-2017-0708	37	TURG2018	3	18	2	118	B	Temperate_coastal_rivers	Eastern_Hudson_Baie-Ungava	CANADA	54°09'27.0"N	69°50'44.0"W	54.1575	-69.8456	CANIAPISCAU	CANIAPISCAU	CA-CA415	HYDRO	UD	73.6	2	2.1	.	4275	845	3430	0.8	D	1.3347	36000	12	1982	1981	-1	17	B	14.4924	0	1.566	0.713	Y	3.463	0.937	0
Boreal river impoundments caused nearshore fish community assemblage shifts but little change in diversity: A multi-scale analysis	Canadian Journal of Fisheries and Aquatic Sciences	2018	JOURNAL	K. Turgeon, C. Turpin, I. Gregory-Eaves	https://doi.org/10.1139/cjfas-2017-0709	37	TURG2018	3	19	3	118	B	Temperate_coastal_rivers	Eastern_Hudson_Baie-Ungava	CANADA	54°09'27.0"N	69°50'44.0"W	54.1575	-69.8456	CANIAPISCAU	CANIAPISCAU	CA-CA415	HYDRO	UD	73.6	2	2.1	.	4275	845	3430	0.8	D	1.3347	36000	12	1982	1982	0	17	F	8.24242	0	1.595	0.767	Y	3.259	0.877	0
Boreal river impoundments caused nearshore fish community assemblage shifts but little change in diversity: A multi-scale analysis	Canadian Journal of Fisheries and Aquatic Sciences	2018	JOURNAL	K. Turgeon, C. Turpin, I. Gregory-Eaves	https://doi.org/10.1139/cjfas-2017-0710	37	TURG2018	7	20	1	119	B	Temperate_coastal_rivers	Eastern_Hudson_Baie-Ungava	CANADA	54°09'27.0"N	69°50'44.0"W	54.1575	-69.8456	CANIAPISCAU	CANIAPISCAU	CA-CA416	HYDRO	UD	56.4	2	2.1	.	4275	845	3430	0.8	D	1.3347	36000	12	1982	1980	-2	17	B	8.23485	0	1.17	0.601	Y	3.619	0.988	0
Boreal river impoundments caused nearshore fish community assemblage shifts but little change in diversity: A multi-scale analysis	Canadian Journal of Fisheries and Aquatic Sciences	2018	JOURNAL	K. Turgeon, C. Turpin, I. Gregory-Eaves	https://doi.org/10.1139/cjfas-2017-0711	37	TURG2018	7	21	2	119	B	Temperate_coastal_rivers	Eastern_Hudson_Baie-Ungava	CANADA	54°09'27.0"N	69°50'44.0"W	54.1575	-69.8456	CANIAPISCAU	CANIAPISCAU	CA-CA416	HYDRO	UD	56.4	2	2.1	.	4275	845	3430	0.8	D	1.3347	36000	12	1982	1981	-1	17	B	10.2348	0	1.435	0.653	Y	3.492	0.937	0
Boreal river impoundments caused nearshore fish community assemblage shifts but little change in diversity: A multi-scale analysis	Canadian Journal of Fisheries and Aquatic Sciences	2018	JOURNAL	K. Turgeon, C. Turpin, I. Gregory-Eaves	https://doi.org/10.1139/cjfas-2017-0712	37	TURG2018	7	22	3	119	B	Temperate_coastal_rivers	Eastern_Hudson_Baie-Ungava	CANADA	54°09'27.0"N	69°50'44.0"W	54.1575	-69.8456	CANIAPISCAU	CANIAPISCAU	CA-CA416	HYDRO	UD	56.4	2	2.1	.	4275	845	3430	0.8	D	1.3347	36000	12	1982	1982	0	17	F	13.6	0	1.407	0.641	Y	3.211	0.929	0
Boreal river impoundments caused nearshore fish community assemblage shifts but little change in diversity: A multi-scale analysis	Canadian Journal of Fisheries and Aquatic Sciences	2018	JOURNAL	K. Turgeon, C. Turpin, I. Gregory-Eaves	https://doi.org/10.1139/cjfas-2017-0713	37	TURG2018	7	23	4	119	B	Temperate_coastal_rivers	Eastern_Hudson_Baie-Ungava	CANADA	54°09'27.0"N	69°50'44.0"W	54.1575	-69.8456	CANIAPISCAU	CANIAPISCAU	CA-CA416	HYDRO	UD	56.4	2	2.1	.	4275	845	3430	0.8	D	1.3347	36000	12	1982	1987	5	17	A	11.3333	0	1.497	0.77	Y	3.621	0.969	0
Boreal river impoundments caused nearshore fish community assemblage shifts but little change in diversity: A multi-scale analysis	Canadian Journal of Fisheries and Aquatic Sciences	2018	JOURNAL	K. Turgeon, C. Turpin, I. Gregory-Eaves	https://doi.org/10.1139/cjfas-2017-0714	37	TURG2018	7	24	5	119	B	Temperate_coastal_rivers	Eastern_Hudson_Baie-Ungava	CANADA	54°09'27.0"N	69°50'44.0"W	54.1575	-69.8456	CANIAPISCAU	CANIAPISCAU	CA-CA416	HYDRO	UD	56.4	2	2.1	.	4275	845	3430	0.8	D	1.3347	36000	12	1982	1991	9	17	A	4.93333	0	0.796	0.495	Y	3.882	1	0
Boreal river impoundments caused nearshore fish community assemblage shifts but little change in diversity: A multi-scale analysis	Canadian Journal of Fisheries and Aquatic Sciences	2018	JOURNAL	K. Turgeon, C. Turpin, I. Gregory-Eaves	https://doi.org/10.1139/cjfas-2017-0715	37	TURG2018	7	25	6	119	B	Temperate_coastal_rivers	Eastern_Hudson_Baie-Ungava	CANADA	54°09'27.0"N	69°50'44.0"W	54.1575	-69.8456	CANIAPISCAU	CANIAPISCAU	CA-CA416	HYDRO	UD	56.4	2	2.1	.	4275	845	3430	0.8	D	1.3347	36000	12	1982	1993	11	17	A	7.31944	0	1.454	0.747	Y	3.766	1	0
Boreal river impoundments caused nearshore fish community assemblage shifts but little change in diversity: A multi-scale analysis	Canadian Journal of Fisheries and Aquatic Sciences	2018	JOURNAL	K. Turgeon, C. Turpin, I. Gregory-Eaves	https://doi.org/10.1139/cjfas-2017-0716	37	TURG2018	7	26	7	119	B	Temperate_coastal_rivers	Eastern_Hudson_Baie-Ungava	CANADA	54°09'27.0"N	69°50'44.0"W	54.1575	-69.8456	CANIAPISCAU	CANIAPISCAU	CA-CA416	HYDRO	UD	56.4	2	2.1	.	4275	845	3430	0.8	D	1.3347	36000	12	1982	1999	17	17	A	12.3333	0	1.65	0.794	Y	3.715	1	0
Boreal river impoundments caused nearshore fish community assemblage shifts but little change in diversity: A multi-scale analysis	Canadian Journal of Fisheries and Aquatic Sciences	2018	JOURNAL	K. Turgeon, C. Turpin, I. Gregory-Eaves	https://doi.org/10.1139/cjfas-2017-0717	37	TURG2018	6	27	1	120	B	Temperate_coastal_rivers	Eastern_Hudson_Baie-Ungava	CANADA	54°09'27.0"N	69°50'44.0"W	54.1575	-69.8456	CANIAPISCAU	CANIAPISCAU	CA-CA419	HYDRO	UD	122.6	2	2.1	.	4275	845	3430	0.8	D	1.3347	36000	12	1982	1982	0	17	F	9	0	1.51	0.726	Y	3.273	0.852	0
Boreal river impoundments caused nearshore fish community assemblage shifts but little change in diversity: A multi-scale analysis	Canadian Journal of Fisheries and Aquatic Sciences	2018	JOURNAL	K. Turgeon, C. Turpin, I. Gregory-Eaves	https://doi.org/10.1139/cjfas-2017-0718	37	TURG2018	6	28	2	120	B	Temperate_coastal_rivers	Eastern_Hudson_Baie-Ungava	CANADA	54°09'27.0"N	69°50'44.0"W	54.1575	-69.8456	CANIAPISCAU	CANIAPISCAU	CA-CA419	HYDRO	UD	122.6	2	2.1	.	4275	845	3430	0.8	D	1.3347	36000	12	1982	1987	5	17	A	6.46667	0	1.539	0.859	Y	3.369	0.981	0
Boreal river impoundments caused nearshore fish community assemblage shifts but little change in diversity: A multi-scale analysis	Canadian Journal of Fisheries and Aquatic Sciences	2018	JOURNAL	K. Turgeon, C. Turpin, I. Gregory-Eaves	https://doi.org/10.1139/cjfas-2017-0719	37	TURG2018	6	29	3	120	B	Temperate_coastal_rivers	Eastern_Hudson_Baie-Ungava	CANADA	54°09'27.0"N	69°50'44.0"W	54.1575	-69.8456	CANIAPISCAU	CANIAPISCAU	CA-CA419	HYDRO	UD	122.6	2	2.1	.	4275	845	3430	0.8	D	1.3347	36000	12	1982	1991	9	17	A	5.5	0	0.796	0.574	Y	3.878	1	0
Boreal river impoundments caused nearshore fish community assemblage shifts but little change in diversity: A multi-scale analysis	Canadian Journal of Fisheries and Aquatic Sciences	2018	JOURNAL	K. Turgeon, C. Turpin, I. Gregory-Eaves	https://doi.org/10.1139/cjfas-2017-0720	37	TURG2018	6	30	4	120	B	Temperate_coastal_rivers	Eastern_Hudson_Baie-Ungava	CANADA	54°09'27.0"N	69°50'44.0"W	54.1575	-69.8456	CANIAPISCAU	CANIAPISCAU	CA-CA419	HYDRO	UD	122.6	2	2.1	.	4275	845	3430	0.8	D	1.3347	36000	12	1982	1993	11	17	A	9.13809	0	1.34	0.644	Y	3.703	1	0
Boreal river impoundments caused nearshore fish community assemblage shifts but little change in diversity: A multi-scale analysis	Canadian Journal of Fisheries and Aquatic Sciences	2018	JOURNAL	K. Turgeon, C. Turpin, I. Gregory-Eaves	https://doi.org/10.1139/cjfas-2017-0721	37	TURG2018	6	31	5	120	B	Temperate_coastal_rivers	Eastern_Hudson_Baie-Ungava	CANADA	54°09'27.0"N	69°50'44.0"W	54.1575	-69.8456	CANIAPISCAU	CANIAPISCAU	CA-CA419	HYDRO	UD	122.6	2	2.1	.	4275	845	3430	0.8	D	1.3347	36000	12	1982	1997	15	17	A	10.9924	0	1.713	0.779	Y	3.67	0.995	0
Boreal river impoundments caused nearshore fish community assemblage shifts but little change in diversity: A multi-scale analysis	Canadian Journal of Fisheries and Aquatic Sciences	2018	JOURNAL	K. Turgeon, C. Turpin, I. Gregory-Eaves	https://doi.org/10.1139/cjfas-2017-0722	37	TURG2018	6	32	6	120	B	Temperate_coastal_rivers	Eastern_Hudson_Baie-Ungava	CANADA	54°09'27.0"N	69°50'44.0"W	54.1575	-69.8456	CANIAPISCAU	CANIAPISCAU	CA-CA419	HYDRO	UD	122.6	2	2.1	.	4275	845	3430	0.8	D	1.3347	36000	12	1982	1999	17	17	A	9.75	0	1.504	0.773	Y	3.548	0.995	0
Boreal river impoundments caused nearshore fish community assemblage shifts but little change in diversity: A multi-scale analysis	Canadian Journal of Fisheries and Aquatic Sciences	2018	JOURNAL	K. Turgeon, C. Turpin, I. Gregory-Eaves	https://doi.org/10.1139/cjfas-2017-0723	37	TURG2018	8	33	1	121	B	Temperate_coastal_rivers	Eastern_Hudson_Baie-Ungava	CANADA	54°09'27.0"N	69°50'44.0"W	54.1575	-69.8456	CANIAPISCAU	CANIAPISCAU	CA-CE007	HYDRO	D	182	2	2.1	.	4275	845	3430	0.8	D	1.3347	36000	12	1982	1980	-2	17	F	10.2348	0	1.541	0.701	Y	3.226	0.89	0
Boreal river impoundments caused nearshore fish community assemblage shifts but little change in diversity: A multi-scale analysis	Canadian Journal of Fisheries and Aquatic Sciences	2018	JOURNAL	K. Turgeon, C. Turpin, I. Gregory-Eaves	https://doi.org/10.1139/cjfas-2017-0724	37	TURG2018	8	34	2	121	B	Temperate_coastal_rivers	Eastern_Hudson_Baie-Ungava	CANADA	54°09'27.0"N	69°50'44.0"W	54.1575	-69.8456	CANIAPISCAU	CANIAPISCAU	CA-CE007	HYDRO	D	182	2	2.1	.	4275	845	3430	0.8	D	1.3347	36000	12	1982	1981	-1	17	B	10.7	0	1.498	0.72	Y	3.245	0.876	0
Boreal river impoundments caused nearshore fish community assemblage shifts but little change in diversity: A multi-scale analysis	Canadian Journal of Fisheries and Aquatic Sciences	2018	JOURNAL	K. Turgeon, C. Turpin, I. Gregory-Eaves	https://doi.org/10.1139/cjfas-2017-0725	37	TURG2018	8	35	3	121	B	Temperate_coastal_rivers	Eastern_Hudson_Baie-Ungava	CANADA	54°09'27.0"N	69°50'44.0"W	54.1575	-69.8456	CANIAPISCAU	CANIAPISCAU	CA-CE007	HYDRO	D	182	2	2.1	.	4275	845	3430	0.8	D	1.3347	36000	12	1982	1982	0	17	F	11.9861	0	1.701	0.739	Y	3.215	0.864	0
Boreal river impoundments caused nearshore fish community assemblage shifts but little change in diversity: A multi-scale analysis	Canadian Journal of Fisheries and Aquatic Sciences	2018	JOURNAL	K. Turgeon, C. Turpin, I. Gregory-Eaves	https://doi.org/10.1139/cjfas-2017-0726	37	TURG2018	8	36	4	121	B	Temperate_coastal_rivers	Eastern_Hudson_Baie-Ungava	CANADA	54°09'27.0"N	69°50'44.0"W	54.1575	-69.8456	CANIAPISCAU	CANIAPISCAU	CA-CE007	HYDRO	D	182	2	2.1	.	4275	845	3430	0.8	D	1.3347	36000	12	1982	1983	1	17	A	7	0	0.928	0.518	Y	2.954	0.916	0
Boreal river impoundments caused nearshore fish community assemblage shifts but little change in diversity: A multi-scale analysis	Canadian Journal of Fisheries and Aquatic Sciences	2018	JOURNAL	K. Turgeon, C. Turpin, I. Gregory-Eaves	https://doi.org/10.1139/cjfas-2017-0727	37	TURG2018	8	37	5	121	B	Temperate_coastal_rivers	Eastern_Hudson_Baie-Ungava	CANADA	54°09'27.0"N	69°50'44.0"W	54.1575	-69.8456	CANIAPISCAU	CANIAPISCAU	CA-CE007	HYDRO	D	182	2	2.1	.	4275	845	3430	0.8	D	1.3347	36000	12	1982	1984	2	17	A	14.25	0	1.77	0.91	Y	3.791	0.758	0
Boreal river impoundments caused nearshore fish community assemblage shifts but little change in diversity: A multi-scale analysis	Canadian Journal of Fisheries and Aquatic Sciences	2018	JOURNAL	K. Turgeon, C. Turpin, I. Gregory-Eaves	https://doi.org/10.1139/cjfas-2017-0728	37	TURG2018	8	38	6	121	B	Temperate_coastal_rivers	Eastern_Hudson_Baie-Ungava	CANADA	54°09'27.0"N	69°50'44.0"W	54.1575	-69.8456	CANIAPISCAU	CANIAPISCAU	CA-CE007	HYDRO	D	182	2	2.1	.	4275	845	3430	0.8	D	1.3347	36000	12	1982	1987	5	17	A	11.6528	0	1.058	0.509	Y	3.2	0.962	0
Boreal river impoundments caused nearshore fish community assemblage shifts but little change in diversity: A multi-scale analysis	Canadian Journal of Fisheries and Aquatic Sciences	2018	JOURNAL	K. Turgeon, C. Turpin, I. Gregory-Eaves	https://doi.org/10.1139/cjfas-2017-0729	37	TURG2018	8	39	7	121	B	Temperate_coastal_rivers	Eastern_Hudson_Baie-Ungava	CANADA	54°09'27.0"N	69°50'44.0"W	54.1575	-69.8456	CANIAPISCAU	CANIAPISCAU	CA-CE007	HYDRO	D	182	2	2.1	.	4275	845	3430	0.8	D	1.3347	36000	12	1982	1991	9	17	A	8.43333	0	1.141	0.587	Y	3.041	0.919	0
Boreal river impoundments caused nearshore fish community assemblage shifts but little change in diversity: A multi-scale analysis	Canadian Journal of Fisheries and Aquatic Sciences	2018	JOURNAL	K. Turgeon, C. Turpin, I. Gregory-Eaves	https://doi.org/10.1139/cjfas-2017-0730	37	TURG2018	8	40	8	121	B	Temperate_coastal_rivers	Eastern_Hudson_Baie-Ungava	CANADA	54°09'27.0"N	69°50'44.0"W	54.1575	-69.8456	CANIAPISCAU	CANIAPISCAU	CA-CE007	HYDRO	D	182	2	2.1	.	4275	845	3430	0.8	D	1.3347	36000	12	1982	1999	17	17	A	8.24242	0	1.383	0.665	Y	3.129	0.714	0
Boreal river impoundments caused nearshore fish community assemblage shifts but little change in diversity: A multi-scale analysis	Canadian Journal of Fisheries and Aquatic Sciences	2018	JOURNAL	K. Turgeon, C. Turpin, I. Gregory-Eaves	https://doi.org/10.1139/cjfas-2017-0731	37	TURG2018	3	1	1	122	B	Temperate_coastal_rivers	Gulf_of_St_Lawrence_coastal_drainage	CANADA	50°47'51.5"N	66°47'18.3"W	50.7976	-66.7884	STE_MARGUERITE	STE_MARGUERITE	SM-SM002	HYDRO	UD	.	4	14	.	262	31.5	230.5	0.9	C	.	9000	22.4	2001	1992	-9	10	B	8	0	1.3	0.808	Y	2.872	0.682	0
Boreal river impoundments caused nearshore fish community assemblage shifts but little change in diversity: A multi-scale analysis	Canadian Journal of Fisheries and Aquatic Sciences	2018	JOURNAL	K. Turgeon, C. Turpin, I. Gregory-Eaves	https://doi.org/10.1139/cjfas-2017-0732	37	TURG2018	3	2	2	122	B	Temperate_coastal_rivers	Gulf_of_St_Lawrence_coastal_drainage	CANADA	50°47'51.5"N	66°47'18.3"W	50.7976	-66.7884	STE_MARGUERITE	STE_MARGUERITE	SM-SM002	HYDRO	UD	.	4	14	.	263	32.5	230.5	0.9	C	.	9000	22.4	2001	1997	-4	10	B	3	0	1.139	0.708	Y	3.606	1	0
Boreal river impoundments caused nearshore fish community assemblage shifts but little change in diversity: A multi-scale analysis	Canadian Journal of Fisheries and Aquatic Sciences	2018	JOURNAL	K. Turgeon, C. Turpin, I. Gregory-Eaves	https://doi.org/10.1139/cjfas-2017-0733	37	TURG2018	3	3	3	122	B	Temperate_coastal_rivers	Gulf_of_St_Lawrence_coastal_drainage	CANADA	50°47'51.5"N	66°47'18.3"W	50.7976	-66.7884	STE_MARGUERITE	STE_MARGUERITE	SM-SM002	HYDRO	UD	.	4	14	.	264	33.5	230.5	0.9	C	.	9000	22.4	2001	2001	0	10	A	8.83333	0	1.25	0.777	Y	2.862	0.926	0
Boreal river impoundments caused nearshore fish community assemblage shifts but little change in diversity: A multi-scale analysis	Canadian Journal of Fisheries and Aquatic Sciences	2018	JOURNAL	K. Turgeon, C. Turpin, I. Gregory-Eaves	https://doi.org/10.1139/cjfas-2017-0734	37	TURG2018	4	4	1	123	B	Temperate_coastal_rivers	Gulf_of_St_Lawrence_coastal_drainage	CANADA	50°47'51.5"N	66°47'18.3"W	50.7976	-66.7884	STE_MARGUERITE	STE_MARGUERITE	SM-SM075	HYDRO	UD	51.2	4	14	.	265	34.5	230.5	0.9	C	.	9000	22.4	2001	1996	-5	10	B	6	0	0.95	0.865	Y	3.14	0.4	0
Boreal river impoundments caused nearshore fish community assemblage shifts but little change in diversity: A multi-scale analysis	Canadian Journal of Fisheries and Aquatic Sciences	2018	JOURNAL	K. Turgeon, C. Turpin, I. Gregory-Eaves	https://doi.org/10.1139/cjfas-2017-0735	37	TURG2018	4	5	2	123	B	Temperate_coastal_rivers	Gulf_of_St_Lawrence_coastal_drainage	CANADA	50°47'51.5"N	66°47'18.3"W	50.7976	-66.7884	STE_MARGUERITE	STE_MARGUERITE	SM-SM075	HYDRO	UD	51.2	4	14	.	266	35.5	230.5	0.9	C	.	9000	22.4	2001	2001	0	10	A	15	0	1.397	0.718	Y	3.524	0.91	0
Boreal river impoundments caused nearshore fish community assemblage shifts but little change in diversity: A multi-scale analysis	Canadian Journal of Fisheries and Aquatic Sciences	2018	JOURNAL	K. Turgeon, C. Turpin, I. Gregory-Eaves	https://doi.org/10.1139/cjfas-2017-0736	37	TURG2018	4	6	3	123	B	Temperate_coastal_rivers	Gulf_of_St_Lawrence_coastal_drainage	CANADA	50°47'51.5"N	66°47'18.3"W	50.7976	-66.7884	STE_MARGUERITE	STE_MARGUERITE	SM-SM075	HYDRO	UD	51.2	4	14	.	267	36.5	230.5	0.9	C	.	9000	22.4	2001	2005	4	10	A	6	0	1.041	0.751	Y	3.208	1	0
Boreal river impoundments caused nearshore fish community assemblage shifts but little change in diversity: A multi-scale analysis	Canadian Journal of Fisheries and Aquatic Sciences	2018	JOURNAL	K. Turgeon, C. Turpin, I. Gregory-Eaves	https://doi.org/10.1139/cjfas-2017-0737	37	TURG2018	4	7	4	123	B	Temperate_coastal_rivers	Gulf_of_St_Lawrence_coastal_drainage	CANADA	50°47'51.5"N	66°47'18.3"W	50.7976	-66.7884	STE_MARGUERITE	STE_MARGUERITE	SM-SM075	HYDRO	UD	51.2	4	14	.	268	37.5	230.5	0.9	C	.	9000	22.4	2001	2011	10	10	A	6	0	1.109	0.8	Y	2.965	1	0
Boreal river impoundments caused nearshore fish community assemblage shifts but little change in diversity: A multi-scale analysis	Canadian Journal of Fisheries and Aquatic Sciences	2018	JOURNAL	K. Turgeon, C. Turpin, I. Gregory-Eaves	https://doi.org/10.1139/cjfas-2017-0738	37	TURG2018	3	8	1	124	B	Temperate_coastal_rivers	Gulf_of_St_Lawrence_coastal_drainage	CANADA	50°47'51.5"N	66°47'18.3"W	50.7976	-66.7884	STE_MARGUERITE	STE_MARGUERITE	SM-SM072	HYDRO	UD	17.7	4	14	.	269	38.5	230.5	0.9	C	.	9000	22.4	2001	1996	-5	10	B	7	0	0.822	0.593	Y	2.738	0.938	0
Boreal river impoundments caused nearshore fish community assemblage shifts but little change in diversity: A multi-scale analysis	Canadian Journal of Fisheries and Aquatic Sciences	2018	JOURNAL	K. Turgeon, C. Turpin, I. Gregory-Eaves	https://doi.org/10.1139/cjfas-2017-0739	37	TURG2018	3	9	2	124	B	Temperate_coastal_rivers	Gulf_of_St_Lawrence_coastal_drainage	CANADA	50°47'51.5"N	66°47'18.3"W	50.7976	-66.7884	STE_MARGUERITE	STE_MARGUERITE	SM-SM072	HYDRO	UD	17.7	4	14	.	270	39.5	230.5	0.9	C	.	9000	22.4	2001	2005	4	10	A	8.5	0	0.881	0.636	Y	3.412	1	0
Boreal river impoundments caused nearshore fish community assemblage shifts but little change in diversity: A multi-scale analysis	Canadian Journal of Fisheries and Aquatic Sciences	2018	JOURNAL	K. Turgeon, C. Turpin, I. Gregory-Eaves	https://doi.org/10.1139/cjfas-2017-0740	37	TURG2018	3	10	3	124	B	Temperate_coastal_rivers	Gulf_of_St_Lawrence_coastal_drainage	CANADA	50°47'51.5"N	66°47'18.3"W	50.7976	-66.7884	STE_MARGUERITE	STE_MARGUERITE	SM-SM072	HYDRO	UD	17.7	4	14	.	271	40.5	230.5	0.9	C	.	9000	22.4	2001	2011	10	10	A	6.93333	0	1.341	0.833	Y	3.18	0.951	0
Fish reproductive guilds downstream of dams	Journal of Fish Biology	2014	JOURNAL	L. P. Vasconcelos, D. C. Alves, L. C. Gomes	https://onlinelibrary.wiley.com/doi/pdf/10.1111/jfb.12501	38	VASC2014	2	1	1	125	TR	Tropical_and_subtropical_upland_rivers	Upper_Parana	BRAZIL	22°27'55.9"S	52°56'55.6"W	-22.4655	-52.9488	PORTO_PRIMAVERA	PORTO_PRIMAVERA	M	HYDRO	D	.	.	.	.	2250	361.53	1888.47	0.84	L	1.56264	572634	16.6	1998	2000	2	12	A	72	22	.	.	N	.	.	1
Fish reproductive guilds downstream of dams	Journal of Fish Biology	2014	JOURNAL	L. P. Vasconcelos, D. C. Alves, L. C. Gomes	https://onlinelibrary.wiley.com/doi/pdf/10.1111/jfb.12501	38	VASC2014	2	2	2	125	TR	Tropical_and_subtropical_upland_rivers	Upper_Parana	BRAZIL	22°27'55.9"S	52°56'55.6"W	-22.4655	-52.9488	PORTO_PRIMAVERA	PORTO_PRIMAVERA	M	HYDRO	D	.	.	.	.	2250	361.53	1888.47	0.84	L	1.56264	572634	16.6	1998	2010	12	12	A	102	38	.	.	N	.	.	1
Variations in fish assemblages in a tributary of the upper Paraná River, Brazil: A comparison between pre and post-closure phases of dams	River Research and Applications	2009	JOURNAL	Éder André Gubiani, Luiz Carlos Gomes, Angelo Antonio Agostinho, Gilmar Baumgartner	https://onlinelibrary.wiley.com/doi/abs/10.1002/rra.1298?deniedAccessCustomisedMessage=&userIsAuthenticated=false	39	GUBI2009	4	1	1	126	TR	Tropical_and_subtropical_upland_rivers	Upper_Parana	BRAZIL	22°27'55.9"S	52°56'55.6"W	-22.4655	-52.9488	PORTO_PRIMAVERA	PORTO_PRIMAVERA	APERTADO	HYDRO	D	364	.	.	.	2250	361.53	1888.47	0.84	L	1.56264	572634	16.6	1998	1987	-11	5	B	7	.	.	.	N	.	.	1
Variations in fish assemblages in a tributary of the upper Paraná River, Brazil: A comparison between pre and post-closure phases of dams	River Research and Applications	2009	JOURNAL	Éder André Gubiani, Luiz Carlos Gomes, Angelo Antonio Agostinho, Gilmar Baumgartner	https://onlinelibrary.wiley.com/doi/abs/10.1002/rra.1298?deniedAccessCustomisedMessage=&userIsAuthenticated=false	39	GUBI2009	4	2	2	126	TR	Tropical_and_subtropical_upland_rivers	Upper_Parana	BRAZIL	22°27'55.9"S	52°56'55.6"W	-22.4655	-52.9488	PORTO_PRIMAVERA	PORTO_PRIMAVERA	APERTADO	HYDRO	D	364	.	.	.	2250	361.53	1888.47	0.84	L	1.56264	572634	16.6	1998	1988	-10	5	B	7.9	.	.	.	N	.	.	1
Variations in fish assemblages in a tributary of the upper Paraná River, Brazil: A comparison between pre and post-closure phases of dams	River Research and Applications	2009	JOURNAL	Éder André Gubiani, Luiz Carlos Gomes, Angelo Antonio Agostinho, Gilmar Baumgartner	https://onlinelibrary.wiley.com/doi/abs/10.1002/rra.1298?deniedAccessCustomisedMessage=&userIsAuthenticated=false	39	GUBI2009	4	3	3	126	TR	Tropical_and_subtropical_upland_rivers	Upper_Parana	BRAZIL	22°27'55.9"S	52°56'55.6"W	-22.4655	-52.9488	PORTO_PRIMAVERA	PORTO_PRIMAVERA	APERTADO	HYDRO	D	364	.	.	.	2250	361.53	1888.47	0.84	L	1.56264	572634	16.6	1998	1989	-9	5	B	9	.	.	.	N	.	.	1
Variations in fish assemblages in a tributary of the upper Paraná River, Brazil: A comparison between pre and post-closure phases of dams	River Research and Applications	2009	JOURNAL	Éder André Gubiani, Luiz Carlos Gomes, Angelo Antonio Agostinho, Gilmar Baumgartner	https://onlinelibrary.wiley.com/doi/abs/10.1002/rra.1298?deniedAccessCustomisedMessage=&userIsAuthenticated=false	39	GUBI2009	4	4	4	126	TR	Tropical_and_subtropical_upland_rivers	Upper_Parana	BRAZIL	22°27'55.9"S	52°56'55.6"W	-22.4655	-52.9488	PORTO_PRIMAVERA	PORTO_PRIMAVERA	APERTADO	HYDRO	D	364	.	.	.	2250	361.53	1888.47	0.84	L	1.56264	572634	16.6	1998	2003	5	5	A	15	.	.	.	N	.	.	1
Variations in fish assemblages in a tributary of the upper Paraná River, Brazil: A comparison between pre and post-closure phases of dams	River Research and Applications	2009	JOURNAL	Éder André Gubiani, Luiz Carlos Gomes, Angelo Antonio Agostinho, Gilmar Baumgartner	https://onlinelibrary.wiley.com/doi/abs/10.1002/rra.1298?deniedAccessCustomisedMessage=&userIsAuthenticated=false	39	GUBI2009	4	5	1	127	TR	Tropical_and_subtropical_upland_rivers	Upper_Parana	BRAZIL	22°27'55.9"S	52°56'55.6"W	-22.4655	-52.9488	PORTO_PRIMAVERA	PORTO_PRIMAVERA	CAMPINA	HYDRO	D	516	.	.	.	2250	361.53	1888.47	0.84	L	1.56264	572634	16.6	1998	1987	-11	5	B	13	.	.	.	N	.	.	1
Variations in fish assemblages in a tributary of the upper Paraná River, Brazil: A comparison between pre and post-closure phases of dams	River Research and Applications	2009	JOURNAL	Éder André Gubiani, Luiz Carlos Gomes, Angelo Antonio Agostinho, Gilmar Baumgartner	https://onlinelibrary.wiley.com/doi/abs/10.1002/rra.1298?deniedAccessCustomisedMessage=&userIsAuthenticated=false	39	GUBI2009	4	6	2	127	TR	Tropical_and_subtropical_upland_rivers	Upper_Parana	BRAZIL	22°27'55.9"S	52°56'55.6"W	-22.4655	-52.9488	PORTO_PRIMAVERA	PORTO_PRIMAVERA	CAMPINA	HYDRO	D	516	.	.	.	2250	361.53	1888.47	0.84	L	1.56264	572634	16.6	1998	1988	-10	5	B	12.2	.	.	.	N	.	.	1
Variations in fish assemblages in a tributary of the upper Paraná River, Brazil: A comparison between pre and post-closure phases of dams	River Research and Applications	2009	JOURNAL	Éder André Gubiani, Luiz Carlos Gomes, Angelo Antonio Agostinho, Gilmar Baumgartner	https://onlinelibrary.wiley.com/doi/abs/10.1002/rra.1298?deniedAccessCustomisedMessage=&userIsAuthenticated=false	39	GUBI2009	4	7	3	127	TR	Tropical_and_subtropical_upland_rivers	Upper_Parana	BRAZIL	22°27'55.9"S	52°56'55.6"W	-22.4655	-52.9488	PORTO_PRIMAVERA	PORTO_PRIMAVERA	CAMPINA	HYDRO	D	516	.	.	.	2250	361.53	1888.47	0.84	L	1.56264	572634	16.6	1998	1989	-9	5	B	14	.	.	.	N	.	.	1
Variations in fish assemblages in a tributary of the upper Paraná River, Brazil: A comparison between pre and post-closure phases of dams	River Research and Applications	2009	JOURNAL	Éder André Gubiani, Luiz Carlos Gomes, Angelo Antonio Agostinho, Gilmar Baumgartner	https://onlinelibrary.wiley.com/doi/abs/10.1002/rra.1298?deniedAccessCustomisedMessage=&userIsAuthenticated=false	39	GUBI2009	4	8	4	127	TR	Tropical_and_subtropical_upland_rivers	Upper_Parana	BRAZIL	22°27'55.9"S	52°56'55.6"W	-22.4655	-52.9488	PORTO_PRIMAVERA	PORTO_PRIMAVERA	CAMPINA	HYDRO	D	516	.	.	.	2250	361.53	1888.47	0.84	L	1.56264	572634	16.6	1998	2003	5	5	A	13.9	.	.	.	N	.	.	1
Changes in distance decay relationships after river regulation: similarity among fish assemblages in a large Amazonian river	Ecology of Freshwater Fish	2013	JOURNAL	Ercilia S. Araújo, Elineide E. Marques, Iriene S. Freitas, Andréa L. Neuberger, Rodrigo Fernandes, Fernando M. Pelicice	https://onlinelibrary.wiley.com/doi/abs/10.1111/eff.12054	40	ARAU2013	4	1	1	128	TR	Tropical_and_subtropical_upland_rivers	Tocatins-Araguaia	BRAZIL	10°18'36.6"S	48°23'51.5"W	-10.3102	-48.3976	LAJEADO	LAJEADO	1	HYDRO	UD	2	.	.	.	630	84.02	545.98	0.87	C	0.704682	767000	8.8	2002	2000	-2	1	B	90	.	.	.	N	.	.	1
Changes in distance decay relationships after river regulation: similarity among fish assemblages in a large Amazonian river	Ecology of Freshwater Fish	2013	JOURNAL	Ercilia S. Araújo, Elineide E. Marques, Iriene S. Freitas, Andréa L. Neuberger, Rodrigo Fernandes, Fernando M. Pelicice	https://onlinelibrary.wiley.com/doi/abs/10.1111/eff.12054	40	ARAU2013	4	2	2	128	TR	Tropical_and_subtropical_upland_rivers	Tocatins-Araguaia	BRAZIL	10°18'36.6"S	48°23'51.5"W	-10.3102	-48.3976	LAJEADO	LAJEADO	1	HYDRO	UD	2	.	.	.	630	84.02	545.98	0.87	C	0.704682	767000	8.8	2002	2001	-1	1	B	76	.	.	.	N	.	.	1
Changes in distance decay relationships after river regulation: similarity among fish assemblages in a large Amazonian river	Ecology of Freshwater Fish	2013	JOURNAL	Ercilia S. Araújo, Elineide E. Marques, Iriene S. Freitas, Andréa L. Neuberger, Rodrigo Fernandes, Fernando M. Pelicice	https://onlinelibrary.wiley.com/doi/abs/10.1111/eff.12054	40	ARAU2013	4	3	3	128	TR	Tropical_and_subtropical_upland_rivers	Tocatins-Araguaia	BRAZIL	10°18'36.6"S	48°23'51.5"W	-10.3102	-48.3976	LAJEADO	LAJEADO	1	HYDRO	UD	2	.	.	.	630	84.02	545.98	0.87	C	0.704682	767000	8.8	2002	2002	0	1	A	67	.	.	.	N	.	.	1
Changes in distance decay relationships after river regulation: similarity among fish assemblages in a large Amazonian river	Ecology of Freshwater Fish	2013	JOURNAL	Ercilia S. Araújo, Elineide E. Marques, Iriene S. Freitas, Andréa L. Neuberger, Rodrigo Fernandes, Fernando M. Pelicice	https://onlinelibrary.wiley.com/doi/abs/10.1111/eff.12054	40	ARAU2013	4	4	4	128	TR	Tropical_and_subtropical_upland_rivers	Tocatins-Araguaia	BRAZIL	10°18'36.6"S	48°23'51.5"W	-10.3102	-48.3976	LAJEADO	LAJEADO	1	HYDRO	UD	2	.	.	.	630	84.02	545.98	0.87	C	0.704682	767000	8.8	2002	2003	1	1	A	69	.	.	.	N	.	.	1
Changes in distance decay relationships after river regulation: similarity among fish assemblages in a large Amazonian river	Ecology of Freshwater Fish	2013	JOURNAL	Ercilia S. Araújo, Elineide E. Marques, Iriene S. Freitas, Andréa L. Neuberger, Rodrigo Fernandes, Fernando M. Pelicice	https://onlinelibrary.wiley.com/doi/abs/10.1111/eff.12054	40	ARAU2013	4	5	1	129	TR	Tropical_and_subtropical_upland_rivers	Tocatins-Araguaia	BRAZIL	10°18'36.6"S	48°23'51.5"W	-10.3102	-48.3976	LAJEADO	LAJEADO	4	HYDRO	UD	92	.	.	.	630	84.02	545.98	0.87	C	0.704682	767000	8.8	2002	2000	-2	1	B	86	.	.	.	N	.	.	1
Changes in distance decay relationships after river regulation: similarity among fish assemblages in a large Amazonian river	Ecology of Freshwater Fish	2013	JOURNAL	Ercilia S. Araújo, Elineide E. Marques, Iriene S. Freitas, Andréa L. Neuberger, Rodrigo Fernandes, Fernando M. Pelicice	https://onlinelibrary.wiley.com/doi/abs/10.1111/eff.12054	40	ARAU2013	4	6	2	129	TR	Tropical_and_subtropical_upland_rivers	Tocatins-Araguaia	BRAZIL	10°18'36.6"S	48°23'51.5"W	-10.3102	-48.3976	LAJEADO	LAJEADO	4	HYDRO	UD	92	.	.	.	630	84.02	545.98	0.87	C	0.704682	767000	8.8	2002	2001	-1	1	B	82	.	.	.	N	.	.	1
Changes in distance decay relationships after river regulation: similarity among fish assemblages in a large Amazonian river	Ecology of Freshwater Fish	2013	JOURNAL	Ercilia S. Araújo, Elineide E. Marques, Iriene S. Freitas, Andréa L. Neuberger, Rodrigo Fernandes, Fernando M. Pelicice	https://onlinelibrary.wiley.com/doi/abs/10.1111/eff.12054	40	ARAU2013	4	7	3	129	TR	Tropical_and_subtropical_upland_rivers	Tocatins-Araguaia	BRAZIL	10°18'36.6"S	48°23'51.5"W	-10.3102	-48.3976	LAJEADO	LAJEADO	4	HYDRO	UD	92	.	.	.	630	84.02	545.98	0.87	C	0.704682	767000	8.8	2002	2002	0	1	A	93	.	.	.	N	.	.	1
Changes in distance decay relationships after river regulation: similarity among fish assemblages in a large Amazonian river	Ecology of Freshwater Fish	2013	JOURNAL	Ercilia S. Araújo, Elineide E. Marques, Iriene S. Freitas, Andréa L. Neuberger, Rodrigo Fernandes, Fernando M. Pelicice	https://onlinelibrary.wiley.com/doi/abs/10.1111/eff.12054	40	ARAU2013	4	8	4	129	TR	Tropical_and_subtropical_upland_rivers	Tocatins-Araguaia	BRAZIL	10°18'36.6"S	48°23'51.5"W	-10.3102	-48.3976	LAJEADO	LAJEADO	4	HYDRO	UD	92	.	.	.	630	84.02	545.98	0.87	C	0.704682	767000	8.8	2002	2003	1	1	A	68	.	.	.	N	.	.	1
Changes in distance decay relationships after river regulation: similarity among fish assemblages in a large Amazonian river	Ecology of Freshwater Fish	2013	JOURNAL	Ercilia S. Araújo, Elineide E. Marques, Iriene S. Freitas, Andréa L. Neuberger, Rodrigo Fernandes, Fernando M. Pelicice	https://onlinelibrary.wiley.com/doi/abs/10.1111/eff.12054	40	ARAU2013	4	9	1	130	TR	Tropical_and_subtropical_upland_rivers	Tocatins-Araguaia	BRAZIL	10°18'36.6"S	48°23'51.5"W	-10.3102	-48.3976	LAJEADO	LAJEADO	6	HYDRO	UR	182.6	.	.	.	630	84.02	545.98	0.87	C	0.704682	767000	8.8	2002	2000	-2	1	B	98	.	.	.	N	.	.	1
Changes in distance decay relationships after river regulation: similarity among fish assemblages in a large Amazonian river	Ecology of Freshwater Fish	2013	JOURNAL	Ercilia S. Araújo, Elineide E. Marques, Iriene S. Freitas, Andréa L. Neuberger, Rodrigo Fernandes, Fernando M. Pelicice	https://onlinelibrary.wiley.com/doi/abs/10.1111/eff.12054	40	ARAU2013	4	10	2	130	TR	Tropical_and_subtropical_upland_rivers	Tocatins-Araguaia	BRAZIL	10°18'36.6"S	48°23'51.5"W	-10.3102	-48.3976	LAJEADO	LAJEADO	6	HYDRO	UR	182.6	.	.	.	630	84.02	545.98	0.87	C	0.704682	767000	8.8	2002	2001	-1	1	B	76	.	.	.	N	.	.	1
Changes in distance decay relationships after river regulation: similarity among fish assemblages in a large Amazonian river	Ecology of Freshwater Fish	2013	JOURNAL	Ercilia S. Araújo, Elineide E. Marques, Iriene S. Freitas, Andréa L. Neuberger, Rodrigo Fernandes, Fernando M. Pelicice	https://onlinelibrary.wiley.com/doi/abs/10.1111/eff.12054	40	ARAU2013	4	11	3	130	TR	Tropical_and_subtropical_upland_rivers	Tocatins-Araguaia	BRAZIL	10°18'36.6"S	48°23'51.5"W	-10.3102	-48.3976	LAJEADO	LAJEADO	6	HYDRO	UR	182.6	.	.	.	630	84.02	545.98	0.87	C	0.704682	767000	8.8	2002	2002	0	1	A	71	.	.	.	N	.	.	1
Changes in distance decay relationships after river regulation: similarity among fish assemblages in a large Amazonian river	Ecology of Freshwater Fish	2013	JOURNAL	Ercilia S. Araújo, Elineide E. Marques, Iriene S. Freitas, Andréa L. Neuberger, Rodrigo Fernandes, Fernando M. Pelicice	https://onlinelibrary.wiley.com/doi/abs/10.1111/eff.12054	40	ARAU2013	4	12	4	130	TR	Tropical_and_subtropical_upland_rivers	Tocatins-Araguaia	BRAZIL	10°18'36.6"S	48°23'51.5"W	-10.3102	-48.3976	LAJEADO	LAJEADO	6	HYDRO	UR	182.6	.	.	.	630	84.02	545.98	0.87	C	0.704682	767000	8.8	2002	2003	1	1	A	68	.	.	.	N	.	.	1
Changes in distance decay relationships after river regulation: similarity among fish assemblages in a large Amazonian river	Ecology of Freshwater Fish	2013	JOURNAL	Ercilia S. Araújo, Elineide E. Marques, Iriene S. Freitas, Andréa L. Neuberger, Rodrigo Fernandes, Fernando M. Pelicice	https://onlinelibrary.wiley.com/doi/abs/10.1111/eff.12054	40	ARAU2013	3	13	1	131	TR	Tropical_and_subtropical_upland_rivers	Tocatins-Araguaia	BRAZIL	10°18'36.6"S	48°23'51.5"W	-10.3102	-48.3976	LAJEADO	LAJEADO	7	HYDRO	UR	275.1	.	.	.	630	84.02	545.98	0.87	C	0.704682	767000	8.8	2002	2000	-2	1	B	97	.	.	.	N	.	.	1
Changes in distance decay relationships after river regulation: similarity among fish assemblages in a large Amazonian river	Ecology of Freshwater Fish	2013	JOURNAL	Ercilia S. Araújo, Elineide E. Marques, Iriene S. Freitas, Andréa L. Neuberger, Rodrigo Fernandes, Fernando M. Pelicice	https://onlinelibrary.wiley.com/doi/abs/10.1111/eff.12054	40	ARAU2013	3	14	2	131	TR	Tropical_and_subtropical_upland_rivers	Tocatins-Araguaia	BRAZIL	10°18'36.6"S	48°23'51.5"W	-10.3102	-48.3976	LAJEADO	LAJEADO	7	HYDRO	UR	275.1	.	.	.	630	84.02	545.98	0.87	C	0.704682	767000	8.8	2002	2001	-1	1	B	101	.	.	.	N	.	.	1
Changes in distance decay relationships after river regulation: similarity among fish assemblages in a large Amazonian river	Ecology of Freshwater Fish	2013	JOURNAL	Ercilia S. Araújo, Elineide E. Marques, Iriene S. Freitas, Andréa L. Neuberger, Rodrigo Fernandes, Fernando M. Pelicice	https://onlinelibrary.wiley.com/doi/abs/10.1111/eff.12054	40	ARAU2013	3	15	3	131	TR	Tropical_and_subtropical_upland_rivers	Tocatins-Araguaia	BRAZIL	10°18'36.6"S	48°23'51.5"W	-10.3102	-48.3976	LAJEADO	LAJEADO	7	HYDRO	UR	275.1	.	.	.	630	84.02	545.98	0.87	C	0.704682	767000	8.8	2002	2002	0	1	A	93	.	.	.	N	.	.	1
Impacts of the Samuel Hydroelectric Dam on the Fish Communities of the Jamari River, in Rondônia, Brazil.	Acta Amazonica	1995	JOURNAL	Geraldo Mendes dos Santos	http://www.scielo.br/scielo.php?pid=S0044-59671995000400247&script=sci_abstract	41	SANT1995	2	1	1	132	TR	Tropical_and_subtropical_upland_rivers	Madeira_Brazilian_Shield	BRAZIL	8°48'26.8"S	63°21'43.7"W	-8.80743	-63.3621	SAMUEL	SAMUEL	1	HYDRO	UR	.	.	.	.	579	26.36	552.64	0.95	L	1.69382	15280	.	1988	1985	-3	4	B	20	.	3.09	0.81	N	.	.	.
Impacts of the Samuel Hydroelectric Dam on the Fish Communities of the Jamari River, in Rondônia, Brazil.	Acta Amazonica	1995	JOURNAL	Geraldo Mendes dos Santos	http://www.scielo.br/scielo.php?pid=S0044-59671995000400247&script=sci_abstract	41	SANT1995	2	2	2	132	TR	Tropical_and_subtropical_upland_rivers	Madeira_Brazilian_Shield	BRAZIL	8°48'26.8"S	63°21'43.7"W	-8.80743	-63.3621	SAMUEL	SAMUEL	1	HYDRO	UR	.	.	.	.	579	26.36	552.64	0.95	L	1.69382	15280	.	1988	1992	4	4	A	15	.	1.61	0.55	N	.	.	.
Impacts of the Samuel Hydroelectric Dam on the Fish Communities of the Jamari River, in Rondônia, Brazil.	Acta Amazonica	1995	JOURNAL	Geraldo Mendes dos Santos	http://www.scielo.br/scielo.php?pid=S0044-59671995000400247&script=sci_abstract	41	SANT1995	2	3	1	133	TR	Tropical_and_subtropical_upland_rivers	Madeira_Brazilian_Shield	BRAZIL	8°48'26.8"S	63°21'43.7"W	-8.80743	-63.3621	SAMUEL	SAMUEL	1	HYDRO	D	.	.	.	.	579	26.36	552.64	0.95	L	1.69382	15280	.	1988	1985	-3	4	B	13	.	3.3	0.93	N	.	.	.
Impacts of the Samuel Hydroelectric Dam on the Fish Communities of the Jamari River, in Rondônia, Brazil.	Acta Amazonica	1995	JOURNAL	Geraldo Mendes dos Santos	http://www.scielo.br/scielo.php?pid=S0044-59671995000400247&script=sci_abstract	41	SANT1995	2	4	2	133	TR	Tropical_and_subtropical_upland_rivers	Madeira_Brazilian_Shield	BRAZIL	8°48'26.8"S	63°21'43.7"W	-8.80743	-63.3621	SAMUEL	SAMUEL	1	HYDRO	D	.	.	.	.	579	26.36	552.64	0.95	L	1.69382	15280	.	1988	1992	4	4	A	15	.	2.48	0.64	N	.	.	.
Impacts of the Samuel Hydroelectric Dam on the Fish Communities of the Jamari River, in Rondônia, Brazil.	Acta Amazonica	1995	JOURNAL	Geraldo Mendes dos Santos	http://www.scielo.br/scielo.php?pid=S0044-59671995000400247&script=sci_abstract	41	SANT1995	2	5	1	134	TR	Tropical_and_subtropical_upland_rivers	Madeira_Brazilian_Shield	BRAZIL	8°48'26.8"S	63°21'43.7"W	-8.80743	-63.3621	SAMUEL	SAMUEL	1	HYDRO	UD	.	.	.	.	579	26.36	552.64	0.95	L	1.69382	15280	.	1988	1985	-3	4	B	13	.	3.06	0.82	N	.	.	.
Impacts of the Samuel Hydroelectric Dam on the Fish Communities of the Jamari River, in Rondônia, Brazil.	Acta Amazonica	1995	JOURNAL	Geraldo Mendes dos Santos	http://www.scielo.br/scielo.php?pid=S0044-59671995000400247&script=sci_abstract	41	SANT1995	2	6	2	134	TR	Tropical_and_subtropical_upland_rivers	Madeira_Brazilian_Shield	BRAZIL	8°48'26.8"S	63°21'43.7"W	-8.80743	-63.3621	SAMUEL	SAMUEL	1	HYDRO	UD	.	.	.	.	579	26.36	552.64	0.95	L	1.69382	15280	.	1988	1992	4	4	A	11	.	2.8	0.73	N	.	.	.
Short Term Effects of Tucuruí Dam (Amazonia, Brazil) on the Trophic Organization of Fish Communities	Environmental Biology of Fishes	2001	JOURNAL	Bernard de Mérona, Geraldo Mendes dos Santos, Raimunda Goncçalves de Almeida	https://rd.springer.com/article/10.1023%2FA%3A1011033025706	42	MER2001	2	1	1	135	TR	Tropical_and_subtropical_upland_rivers	Tacantins-Araguaia	BRAZIL	3°52'38.2"S	49°38'22.3"W	-3.87728	-49.6395	TUCURUI	TUCURUI	1	HYDRO	UD	.	.	.	.	2349.1	310.19	2038.91	0.87	D	2.56492	762670	21.1	1984	1981	-3	2	B	152	.	3.347	0.742	Y	3.083	0.374	1
Short Term Effects of Tucuruí Dam (Amazonia, Brazil) on the Trophic Organization of Fish Communities	Environmental Biology of Fishes	2001	JOURNAL	Bernard de Mérona, Geraldo Mendes dos Santos, Raimunda Goncçalves de Almeida	https://rd.springer.com/article/10.1023%2FA%3A1011033025706	42	MER2001	2	2	2	135	TR	Tropical_and_subtropical_upland_rivers	Tacantins-Araguaia	BRAZIL	3°52'38.2"S	49°38'22.3"W	-3.87728	-49.6395	TUCURUI	TUCURUI	1	HYDRO	UD	.	.	.	.	2349.1	310.19	2038.91	0.87	D	2.56492	762670	21.1	1984	1986	2	2	A	127	.	3.644	0.839	Y	3.53	0.586	1
Short Term Effects of Tucuruí Dam (Amazonia, Brazil) on the Trophic Organization of Fish Communities	Environmental Biology of Fishes	2001	JOURNAL	Bernard de Mérona, Geraldo Mendes dos Santos, Raimunda Goncçalves de Almeida	https://rd.springer.com/article/10.1023%2FA%3A1011033025706	42	MER2001	2	3	1	136	TR	Tropical_and_subtropical_upland_rivers	Tacantins-Araguaia	BRAZIL	3°52'38.2"S	49°38'22.3"W	-3.87728	-49.6395	TUCURUI	TUCURUI	2	HYDRO	D	.	.	.	.	2349.1	310.19	2038.91	0.87	D	2.56492	762670	21.1	1984	1981	-3	2	B	144	.	3.478	0.775	Y	3.467	0.63	1
Short Term Effects of Tucuruí Dam (Amazonia, Brazil) on the Trophic Organization of Fish Communities	Environmental Biology of Fishes	2001	JOURNAL	Bernard de Mérona, Geraldo Mendes dos Santos, Raimunda Goncçalves de Almeida	https://rd.springer.com/article/10.1023%2FA%3A1011033025706	42	MER2001	2	4	2	136	TR	Tropical_and_subtropical_upland_rivers	Tacantins-Araguaia	BRAZIL	3°52'38.2"S	49°38'22.3"W	-3.87728	-49.6395	TUCURUI	TUCURUI	2	HYDRO	D	.	.	.	.	2349.1	310.19	2038.91	0.87	D	2.56492	762670	21.1	1984	1986	2	2	A	141	.	3.102	0.752	Y	3.661	0.75	1
Diet and trophic structure of the fish fauna in a subtropical ecosystem: impoundment effects	Neotropical Ichthyology	2013	JOURNAL	Rosilene Luciana Delariva, Norma Segatti Hahn, Elaine Antoniassi Luiz Kashiwaqui	http://www.scielo.br/scielo.php?pid=S1679-62252013000400891&script=sci_arttext	43	DELA2013	2	1	1	137	TR	Tropical_and_subtropical_upland_rivers	Iguassu	BRAZIL	25°32'19.4"S	53°29'35.4"W	-25.5387	-53.4932	SALTO_CAXIAS	SALTO_CAXIAS	1	HYDRO	UD	77.3	0.333333	.	.	131	41.19	89.81	0.69	C	3.42045	72000	20	1998	1997	-1	1	B	21	.	2.512	0.825	Y	2.918	0.494	0
Diet and trophic structure of the fish fauna in a subtropical ecosystem: impoundment effects	Neotropical Ichthyology	2013	JOURNAL	Rosilene Luciana Delariva, Norma Segatti Hahn, Elaine Antoniassi Luiz Kashiwaqui	http://www.scielo.br/scielo.php?pid=S1679-62252013000400891&script=sci_arttext	43	DELA2013	2	2	2	137	TR	Tropical_and_subtropical_upland_rivers	Iguassu	BRAZIL	25°32'19.4"S	53°29'35.4"W	-25.5387	-53.4932	SALTO_CAXIAS	SALTO_CAXIAS	1	HYDRO	UD	77.3	0.333333	.	.	131	41.19	89.81	0.69	C	3.42045	72000	20	1998	1999	1	1	A	18	.	2.419	0.837	Y	3.004	0.705	0
Diet and trophic structure of the fish fauna in a subtropical ecosystem: impoundment effects	Neotropical Ichthyology	2013	JOURNAL	Rosilene Luciana Delariva, Norma Segatti Hahn, Elaine Antoniassi Luiz Kashiwaqui	http://www.scielo.br/scielo.php?pid=S1679-62252013000400891&script=sci_arttext	43	DELA2013	2	3	1	138	TR	Tropical_and_subtropical_upland_rivers	Iguassu	BRAZIL	25°32'19.4"S	53°29'35.4"W	-25.5387	-53.4932	SALTO_CAXIAS	SALTO_CAXIAS	2	HYDRO	UD	43.1	0.333333	.	.	131	41.19	89.81	0.69	C	3.42045	72000	20	1998	1997	-1	1	B	18	.	2.469	0.854	Y	3.031	0.598	0
Diet and trophic structure of the fish fauna in a subtropical ecosystem: impoundment effects	Neotropical Ichthyology	2013	JOURNAL	Rosilene Luciana Delariva, Norma Segatti Hahn, Elaine Antoniassi Luiz Kashiwaqui	http://www.scielo.br/scielo.php?pid=S1679-62252013000400891&script=sci_arttext	43	DELA2013	2	4	2	138	TR	Tropical_and_subtropical_upland_rivers	Iguassu	BRAZIL	25°32'19.4"S	53°29'35.4"W	-25.5387	-53.4932	SALTO_CAXIAS	SALTO_CAXIAS	2	HYDRO	UD	43.1	0.333333	.	.	131	41.19	89.81	0.69	C	3.42045	72000	20	1998	1999	1	1	A	19	.	2.507	0.851	Y	2.826	0.783	0
Diet and trophic structure of the fish fauna in a subtropical ecosystem: impoundment effects	Neotropical Ichthyology	2013	JOURNAL	Rosilene Luciana Delariva, Norma Segatti Hahn, Elaine Antoniassi Luiz Kashiwaqui	http://www.scielo.br/scielo.php?pid=S1679-62252013000400891&script=sci_arttext	43	DELA2013	2	5	1	139	TR	Tropical_and_subtropical_upland_rivers	Iguassu	BRAZIL	25°32'19.4"S	53°29'35.4"W	-25.5387	-53.4932	SALTO_CAXIAS	SALTO_CAXIAS	3	HYDRO	UD	2.3	0.333333	.	.	131	41.19	89.81	0.69	C	3.42045	72000	20	1998	1997	-1	1	B	21	.	2.249	0.739	Y	3.075	0.4	0
Diet and trophic structure of the fish fauna in a subtropical ecosystem: impoundment effects	Neotropical Ichthyology	2013	JOURNAL	Rosilene Luciana Delariva, Norma Segatti Hahn, Elaine Antoniassi Luiz Kashiwaqui	http://www.scielo.br/scielo.php?pid=S1679-62252013000400891&script=sci_arttext	43	DELA2013	2	6	2	139	TR	Tropical_and_subtropical_upland_rivers	Iguassu	BRAZIL	25°32'19.4"S	53°29'35.4"W	-25.5387	-53.4932	SALTO_CAXIAS	SALTO_CAXIAS	3	HYDRO	UD	2.3	0.333333	.	.	131	41.19	89.81	0.69	C	3.42045	72000	20	1998	1999	1	1	A	18	.	2.418	0.837	Y	2.878	0.693	0
Diet and trophic structure of the fish fauna in a subtropical ecosystem: impoundment effects	Neotropical Ichthyology	2013	JOURNAL	Rosilene Luciana Delariva, Norma Segatti Hahn, Elaine Antoniassi Luiz Kashiwaqui	http://www.scielo.br/scielo.php?pid=S1679-62252013000400891&script=sci_arttext	43	DELA2013	2	7	1	140	TR	Tropical_and_subtropical_upland_rivers	Iguassu	BRAZIL	25°32'19.4"S	53°29'35.4"W	-25.5387	-53.4932	SALTO_CAXIAS	SALTO_CAXIAS	4	HYDRO	D	2.2	0.333333	.	.	131	41.19	89.81	0.69	C	3.42045	72000	20	1998	1997	-1	1	B	22	.	2.747	0.889	Y	2.99	0.591	0
Diet and trophic structure of the fish fauna in a subtropical ecosystem: impoundment effects	Neotropical Ichthyology	2013	JOURNAL	Rosilene Luciana Delariva, Norma Segatti Hahn, Elaine Antoniassi Luiz Kashiwaqui	http://www.scielo.br/scielo.php?pid=S1679-62252013000400891&script=sci_arttext	43	DELA2013	2	8	2	140	TR	Tropical_and_subtropical_upland_rivers	Iguassu	BRAZIL	25°32'19.4"S	53°29'35.4"W	-25.5387	-53.4932	SALTO_CAXIAS	SALTO_CAXIAS	4	HYDRO	D	2.2	0.333333	.	.	131	41.19	89.81	0.69	C	3.42045	72000	20	1998	1999	1	1	A	19	.	2.628	0.893	Y	3.058	0.606	0
Analysis of long-term changes in the fish community in Rybinsk reservoir	Journal of Ichthyology	1997	JOURNAL	VG Tereshchenko and A.S. Strel'nikov	Sent by Tereshchenko	44	TERES1997	5	1	1	141	B	Temperate_floodplain_rivers_and_wetlands	Volga-Ural	RUSSIA	58°27'01.0"N	38°26'29.9"E	58.4503	38.4416	RYBINSK	RYBINSK	1	HYDRO	UD	.	7	.	.	4580	432.1	4147.9	0.91	L	0.371806	150074	5.6	1941	1938	-3	54	B	38	.	.	.	N	.	.	0
Analysis of long-term changes in the fish community in Rybinsk reservoir	Journal of Ichthyology	1997	JOURNAL	VG Tereshchenko and A.S. Strel'nikov	Sent by Tereshchenko	44	TERES1997	5	2	2	141	B	Temperate_floodplain_rivers_and_wetlands	Volga-Ural	RUSSIA	58°27'01.0"N	38°26'29.9"E	58.4503	38.4416	RYBINSK	RYBINSK	1	HYDRO	UD	.	7	.	.	4580	432.1	4147.9	0.91	L	0.371806	150074	5.6	1941	1942	1	54	A	27	.	.	.	N	.	.	0
Analysis of long-term changes in the fish community in Rybinsk reservoir	Journal of Ichthyology	1997	JOURNAL	VG Tereshchenko and A.S. Strel'nikov	Sent by Tereshchenko	44	TERES1997	5	3	3	141	B	Temperate_floodplain_rivers_and_wetlands	Volga-Ural	RUSSIA	58°27'01.0"N	38°26'29.9"E	58.4503	38.4416	RYBINSK	RYBINSK	1	HYDRO	UD	.	7	.	.	4580	432.1	4147.9	0.91	L	0.371806	150074	5.6	1941	1945	4	54	A	29	.	.	.	N	.	.	0
Analysis of long-term changes in the fish community in Rybinsk reservoir	Journal of Ichthyology	1997	JOURNAL	VG Tereshchenko and A.S. Strel'nikov	Sent by Tereshchenko	44	TERES1997	5	4	4	141	B	Temperate_floodplain_rivers_and_wetlands	Volga-Ural	RUSSIA	58°27'01.0"N	38°26'29.9"E	58.4503	38.4416	RYBINSK	RYBINSK	1	HYDRO	UD	.	7	.	.	4580	432.1	4147.9	0.91	L	0.371806	150074	5.6	1941	1970	29	54	A	35	.	.	.	N	.	.	0
Analysis of long-term changes in the fish community in Rybinsk reservoir	Journal of Ichthyology	1997	JOURNAL	VG Tereshchenko and A.S. Strel'nikov	Sent by Tereshchenko	44	TERES1997	5	5	5	141	B	Temperate_floodplain_rivers_and_wetlands	Volga-Ural	RUSSIA	58°27'01.0"N	38°26'29.9"E	58.4503	38.4416	RYBINSK	RYBINSK	1	HYDRO	UD	.	7	.	.	4580	432.1	4147.9	0.91	L	0.371806	150074	5.6	1941	1995	54	54	A	36	.	.	.	N	.	.	0
A comparison of Pre- and Post-impoundment fish population in the mountain Fork river in Southeastern Oklahoma	Proceedings of the Oklahoma Academy of Science	1981	JOURNAL	Rex Eley, James Randolph and John Carroll	http://ojs.library.okstate.edu/osu/index.php/OAS/article/view/5185/4854	45	ELEY1981	2	1	1	142	T	Temperate_upland_rivers	Ouachita_Highlands	USA	34°10'38.9"N	94°41'17.4"W	34.1775	-94.6882	BROKEN_BOW	BROKEN_BOW	1	FLOOD_CONT	UR		2	.	.	54.4	3.4	51	0.94	D	3.21726	1983	36.3	1967	1955	-12	7	B	33	.	3.33	.	N	.	.	0
A comparison of Pre- and Post-impoundment fish population in the mountain Fork river in Southeastern Oklahoma	Proceedings of the Oklahoma Academy of Science	1981	JOURNAL	Rex Eley, James Randolph and John Carroll	http://ojs.library.okstate.edu/osu/index.php/OAS/article/view/5185/4854	45	ELEY1981	2	2	2	142	T	Temperate_upland_rivers	Ouachita_Highlands	USA	34°10'38.9"N	94°41'17.4"W	34.1775	-94.6882	BROKEN_BOW	BROKEN_BOW	1	FLOOD_CONT	UR	.	2	.	.	54.4	3.4	51	0.94	D	3.21726	1983	36.3	1967	1974	7	7	A	35	.	2.62	.	N	.	.	0
A comparison of Pre- and Post-impoundment fish population in the mountain Fork river in Southeastern Oklahoma	Proceedings of the Oklahoma Academy of Science	1981	JOURNAL	Rex Eley, James Randolph and John Carroll	http://ojs.library.okstate.edu/osu/index.php/OAS/article/view/5185/4854	45	ELEY1981	2	3	1	143	T	Temperate_upland_rivers	Ouachita_Highlands	USA	34°10'38.9"N	94°41'17.4"W	34.1775	-94.6882	BROKEN_BOW	BROKEN_BOW	2	FLOOD_CONT	UD	.	2	.	.	54.4	3.4	51	0.94	D	3.21726	1983	36.3	1967	1955	-12	7	B	31	.	3.03	.	N	.	.	0
A comparison of Pre- and Post-impoundment fish population in the mountain Fork river in Southeastern Oklahoma	Proceedings of the Oklahoma Academy of Science	1981	JOURNAL	Rex Eley, James Randolph and John Carroll	http://ojs.library.okstate.edu/osu/index.php/OAS/article/view/5185/4854	45	ELEY1981	2	4	2	143	T	Temperate_upland_rivers	Ouachita_Highlands	USA	34°10'38.9"N	94°41'17.4"W	34.1775	-94.6882	BROKEN_BOW	BROKEN_BOW	2	FLOOD_CONT	UD	.	2	.	.	54.4	3.4	51	0.94	D	3.21726	1983	36.3	1967	1974	7	7	A	27	.	2.9	.	N	.	.	0
A comparison of Pre- and Post-impoundment fish population in the mountain Fork river in Southeastern Oklahoma	Proceedings of the Oklahoma Academy of Science	1981	JOURNAL	Rex Eley, James Randolph and John Carroll	http://ojs.library.okstate.edu/osu/index.php/OAS/article/view/5185/4854	45	ELEY1981	2	5	1	144	T	Temperate_upland_rivers	Ouachita_Highlands	USA	34°10'38.9"N	94°41'17.4"W	34.1775	-94.6882	BROKEN_BOW	BROKEN_BOW	3	FLOOD_CONT	D	.	2	.	.	54.4	3.4	51	0.94	D	3.21726	1983	36.3	1967	1955	-12	7	B	70	.	4.61	.	N	.	.	0
A comparison of Pre- and Post-impoundment fish population in the mountain Fork river in Southeastern Oklahoma	Proceedings of the Oklahoma Academy of Science	1981	JOURNAL	Rex Eley, James Randolph and John Carroll	http://ojs.library.okstate.edu/osu/index.php/OAS/article/view/5185/4854	45	ELEY1981	2	6	2	144	T	Temperate_upland_rivers	Ouachita_Highlands	USA	34°10'38.9"N	94°41'17.4"W	34.1775	-94.6882	BROKEN_BOW	BROKEN_BOW	3	FLOOD_CONT	D	.	2	.	.	54.4	3.4	51	0.94	D	3.21726	1983	36.3	1967	1974	7	7	A	58	.	4.24	.	N	.	.	0
Upstream Changes in Fish Populations following Impoundment of Sagehen Creek, California	Transactions of the American Fisheries Society	1973	JOURNAL	Don C. Erman	https://www.tandfonline.com/doi/abs/10.1577/1548-8659(1973)102%3C626%3AUCIFPF%3E2.0.CO%3B2#.UzyBWrSurpc	46	ERM1973	4	1	1	145	T	Xeric_freshwaters_and_endorheic_(closed)_basins	Lahontan	USA	39°28'30.7"N	120°06'29.1"W	39.4752	-120.108	STAMPEDE	STAMPEDE	1	FLOOD_CONT	UR	.	.	.	.	12.9	1.1	11.8	0.91	L	2.28921	363	21.2	1970	1955	-15	2	B	7	.	.	.	N	.	.	0
Upstream Changes in Fish Populations following Impoundment of Sagehen Creek, California	Transactions of the American Fisheries Society	1973	JOURNAL	Don C. Erman	https://www.tandfonline.com/doi/abs/10.1577/1548-8659(1973)102%3C626%3AUCIFPF%3E2.0.CO%3B2#.UzyBWrSurpc	46	ERM1973	4	2	2	145	T	Xeric_freshwaters_and_endorheic_(closed)_basins	Lahontan	USA	39°28'30.7"N	120°06'29.1"W	39.4752	-120.108	STAMPEDE	STAMPEDE	1	FLOOD_CONT	UR	.	.	.	.	12.9	1.1	11.8	0.91	L	2.28921	363	21.2	1970	1970	0	2	A	6	.	.	.	N	.	.	0
Upstream Changes in Fish Populations following Impoundment of Sagehen Creek, California	Transactions of the American Fisheries Society	1973	JOURNAL	Don C. Erman	https://www.tandfonline.com/doi/abs/10.1577/1548-8659(1973)102%3C626%3AUCIFPF%3E2.0.CO%3B2#.UzyBWrSurpc	46	ERM1973	4	3	3	145	T	Xeric_freshwaters_and_endorheic_(closed)_basins	Lahontan	USA	39°28'30.7"N	120°06'29.1"W	39.4752	-120.108	STAMPEDE	STAMPEDE	1	FLOOD_CONT	UR	.	.	.	.	12.9	1.1	11.8	0.91	L	2.28921	363	21.2	1970	1971	1	2	A	5	.	.	.	N	.	.	0
Upstream Changes in Fish Populations following Impoundment of Sagehen Creek, California	Transactions of the American Fisheries Society	1973	JOURNAL	Don C. Erman	https://www.tandfonline.com/doi/abs/10.1577/1548-8659(1973)102%3C626%3AUCIFPF%3E2.0.CO%3B2#.UzyBWrSurpc	46	ERM1973	4	4	4	145	T	Xeric_freshwaters_and_endorheic_(closed)_basins	Lahontan	USA	39°28'30.7"N	120°06'29.1"W	39.4752	-120.108	STAMPEDE	STAMPEDE	1	FLOOD_CONT	UR	.	.	.	.	12.9	1.1	11.8	0.91	L	2.28921	363	21.2	1970	1972	2	2	A	5	.	.	.	N	.	.	0
Upstream Changes in Fish Populations following Impoundment of Sagehen Creek, California	Transactions of the American Fisheries Society	1973	JOURNAL	Don C. Erman	https://www.tandfonline.com/doi/abs/10.1577/1548-8659(1973)102%3C626%3AUCIFPF%3E2.0.CO%3B2#.UzyBWrSurpc	46	ERM1973	2	5	1	146	T	Xeric_freshwaters_and_endorheic_(closed)_basins	Lahontan	USA	39°28'30.7"N	120°06'29.1"W	39.4752	-120.108	STAMPEDE	STAMPEDE	2	FLOOD_CONT	UD	.	.	.	.	12.9	1.1	11.8	0.91	L	2.28921	363	21.2	1970	1955	-15	2	B	7	.	.	.	N	.	.	0
Upstream Changes in Fish Populations following Impoundment of Sagehen Creek, California	Transactions of the American Fisheries Society	1973	JOURNAL	Don C. Erman	https://www.tandfonline.com/doi/abs/10.1577/1548-8659(1973)102%3C626%3AUCIFPF%3E2.0.CO%3B2#.UzyBWrSurpc	46	ERM1973	2	6	2	146	T	Xeric_freshwaters_and_endorheic_(closed)_basins	Lahontan	USA	39°28'30.7"N	120°06'29.1"W	39.4752	-120.108	STAMPEDE	STAMPEDE	2	FLOOD_CONT	UD	.	.	.	.	12.9	1.1	11.8	0.91	L	2.28921	363	21.2	1970	1972	2	2	A	6	.	.	.	N	.	.	0
Changes in the structure of fish assemblages in a river used for energy production	River Research and Applications	1999	JOURNAL	Milan Peňáz, Vlastimil Baruš, Miroslav Prokeš	https://onlinelibrary.wiley.com/doi/abs/10.1002/%28SICI%291099-1646%28199901/06%2915%3A1/3%3C169%3A%3AAID-RRR525%3E3.0.CO%3B2-T	47	PEN1999	4	1	1	147	T	Temperate_upland_rivers	Upper_Danube	CZECH_R.	49°07'42.6"N	16°07'08.9"E	49.1285	16.1191	DALESICE	DALESICE	1	HYDRO	D	25	.	.	.	4.66	1.36	3.29	0.71	C	7.24898	1135	42.4	1979	1974	-5	13	B	9	0	1.58	0.719	N	.	.	0
Changes in the structure of fish assemblages in a river used for energy production	River Research and Applications	1999	JOURNAL	Milan Peňáz, Vlastimil Baruš, Miroslav Prokeš	https://onlinelibrary.wiley.com/doi/abs/10.1002/%28SICI%291099-1646%28199901/06%2915%3A1/3%3C169%3A%3AAID-RRR525%3E3.0.CO%3B2-T	47	PEN1999	4	2	2	147	T	Temperate_upland_rivers	Upper_Danube	CZECH_R.	49°07'42.6"N	16°07'08.9"E	49.1285	16.1191	DALESICE	DALESICE	1	HYDRO	D	25	.	.	.	4.66	1.36	3.29	0.71	C	7.24898	1135	42.4	1979	1980	1	13	A	14	3	1.747	0.63	N	.	.	0
Changes in the structure of fish assemblages in a river used for energy production	River Research and Applications	1999	JOURNAL	Milan Peňáz, Vlastimil Baruš, Miroslav Prokeš	https://onlinelibrary.wiley.com/doi/abs/10.1002/%28SICI%291099-1646%28199901/06%2915%3A1/3%3C169%3A%3AAID-RRR525%3E3.0.CO%3B2-T	47	PEN1999	4	3	3	147	T	Temperate_upland_rivers	Upper_Danube	CZECH_R.	49°07'42.6"N	16°07'08.9"E	49.1285	16.1191	DALESICE	DALESICE	1	HYDRO	D	25	.	.	.	4.66	1.36	3.29	0.71	C	7.24898	1135	42.4	1979	1986	7	13	A	9	5	0.938	0.325	N	.	.	0
Changes in the structure of fish assemblages in a river used for energy production	River Research and Applications	1999	JOURNAL	Milan Peňáz, Vlastimil Baruš, Miroslav Prokeš	https://onlinelibrary.wiley.com/doi/abs/10.1002/%28SICI%291099-1646%28199901/06%2915%3A1/3%3C169%3A%3AAID-RRR525%3E3.0.CO%3B2-T	47	PEN1999	4	4	4	147	T	Temperate_upland_rivers	Upper_Danube	CZECH_R.	49°07'42.6"N	16°07'08.9"E	49.1285	16.1191	DALESICE	DALESICE	1	HYDRO	D	25	.	.	.	4.66	1.36	3.29	0.71	C	7.24898	1135	42.4	1979	1992	13	13	A	9	5	1.458	0.663	N	.	.	0
[truncated: 15 more columns]

## Sheet: DATASET S1.2 (CS)
TITLE	JOURNAL	DATE	CATEGORY	AUTHORS	WEB_LINK	REFNB	REFID	REF	STUDYID	BIOME	HABITAT_TYPE	FECOREGION	COUNTRY	LAT	LONG	N	ECOS	U_D	PURPOSE	Rm1i	Rsd1i	Rn1i	Rm2i	Rsd2i	Rn2i	Dm1i	Dsd1i	Dn1i	Dm2i	Dsd2i	Dn2i	Em1i	Esd1i	En1i	Em2i	Esd2i	En2i	MFGm1i	MFGsd1i	MFGn1i	MFGm2i	MFGsd2i	MFGn2i	MTLm1i	MTLsd1i	MTLn1i	MTLm2i	MTLsd2i	MTLn2i
Boreal river impoundments caused nearshore fish community assemblage shifts but little change in diversity: A multi-scale analysis	Canadian Journal of Fisheries and Aquatic Sciences	2018	JOURNAL	K. Turgeon, C. Turpin, I. Gregory-Eaves	https://doi.org/10.1139/cjfas-2017-0561	37	1	TURGEON2018	1	B	Temperate_coastal_rivers	Eastern_Hudson_Baie-Ungava	CANADA	53.577	-74.4404	17	L	UD	HYDRO	9.66776	3.03714	14	9.98261	2.51677	3	1.32435	0.233394	14	1.47363	0.240713	3	0.700847	0.0900195	14	0.755842	0.0917691	3	0.936354	0.0679094	14	0.921885	0.0676188	3	3.49309	0.272553	14	3.57139	0.229773	3
Boreal river impoundments caused nearshore fish community assemblage shifts but little change in diversity: A multi-scale analysis	Canadian Journal of Fisheries and Aquatic Sciences	2019	JOURNAL	K. Turgeon, C. Turpin, I. Gregory-Eaves	https://doi.org/10.1139/cjfas-2017-0561	37	2	TURGEON2018	2	B	Temperate_coastal_rivers	Eastern_Hudson_Baie-Ungava	CANADA	53.577	-74.4404	7	L	D	HYDRO	11.8701	3.54832	4	9.98261	2.51677	3	1.38939	0.289381	4	1.47363	0.240713	3	0.665694	0.135912	4	0.755842	0.0917691	3	0.712313	0.242011	4	0.921885	0.0676188	3	3.21629	0.333944	4	3.57139	0.229773	3
Effects of water-level regulation on the nearshore fish community in boreal lakes	Hydrobiologia	2008	JOURNAL	Tapio Sutela, Teppo Vehanen	https://rd.springer.com/article/10.1007/s10750-008-9468-z	48	1	SUTELA&V2008	3	B	Polar_freshwaters	Northern_Baltic_Drainages	FINLAND	64.7928	28.7578	13	L	UD	HYDRO	6.75	1.66905	8	5.6	1.94936	5	1.20189	0.471092	8	0.972411	0.49847	5	0.659738	0.253123	8	0.597427	0.259657	5	0.996944	0.00629609	8	0.999369	0.00141124	5	3.7775	0.396103	8	3.32245	0.10838	5
Étude de l'état du marnage sur l'itchyofaune (1989) - Réservoirs Outardes 4 et Baskatong	Groupe de recherche SEEEQ Ltée, Vice-présidence Environnement d'Hydro-Québec	1990	REPORT	Marc Gendron	NA	49	1	GENDRON1990	4	B	Temperate_coastal_rivers	Gulf_of_St.Lawrence_Coastal_Drainages	CANADA	49.2577	-71.1558	7	L	UD	HYDRO	7	3.4641	4	7.33333	2.08167	3	1.45062	0.464913	4	1.54218	0.151386	3	0.803152	0.21366	4	0.791552	0.0525122	3	0.9236	0.0575873	4	0.695333	0.0798269	3	3.44604	0.389958	4	3.33327	0.213017	3
Étude de l'état du marnage sur l'itchyofaune (1990) - Réservoirs Pipmuacan, Outardes 4 et Manic-5	Groupe de recherche SEEEQ Ltée, Vice-présidence Environnement d'Hydro-Québec	1991	REPORT	Marc Gendron and Bruno Bélanger	NA	50	1	GENDRON&B1991	5	B	Temperate_coastal_rivers	Gulf_of_St.Lawrence_Coastal_Drainages	CANADA	50.5997	-69.3692	6	L	UD	HYDRO	6	1	3	7	1	3	0.993644	0.0645947	3	1.26141	0.0537121	3	0.577067	0.0749226	3	0.684638	0.0175053	3	0.935	0.0545252	3	0.811333	0.0880587	3	3.29477	0.123428	3	3.21017	0.0558633	3
Haut-Saint-Maurcie. Aménagement des centrales des Rapides-des-Coeurs et Rapides-de-la-Chaudi`re. Avant-projet, phase 1. Étude sur la faune aquatique - Caractéristiqus de la population de doré jaune et peupelement piscicoles du réservoir Bland	GDG Environnement ltée pour la vie-présidebce Environnement d'Hydro-Québec	1992	REPORT	R. Faucher and L. Gilbert	NA	51	1	FAUCHER&G1992	6	B	Temperate_coastal_rivers	Gulf_of_St.Lawrence_Coastal_Drainages	CANADA	48.3746	-73.9366	6	L	UD	HYDRO	8.33333	2.08167	3	5	1	3	1.62622	0.212486	3	1.16181	0.0311275	3	0.775305	0.0117041	3	0.735881	0.0934264	3	0.812	0.0985343	3	0.740333	0.180539	3	3.62673	0.30751	3	3.67807	0.405652	3
Aménagement hydroélectrique Sainte-marguerite-3 - Évolution des communautés de poissons et du mercure	GENIVAR - Hydro-Québec	2012	REPORT	GENIVAR	NA	52	1	GENIVAR2012	8	B	Temperate_coastal_rivers	Gulf_of_St_Lawrence_coastal_drainage	CANADA	50.7976	-66.7884	3	L	UD	HYDRO	5.5	0.707107	2	5	0	1	1.15624	0.218339	2	0.882238	0.0758361	1	0.756213	0.0855696	2	0.530507	0.0679347	1	0.822021	0.206668	2	0.285671	0.0754222	1	3.14038	0.288373	2	3.00333	0.0385101	1
Comparison between the fish communities of lakes, reservoirs and rivers: can natural systems help define the ecological potential of reservoirs?	Aquatic Sciences	2006	JOURNAL	Pascal Irz, Mélanie Odion, Christine Argillier, Didier Pont	https://rd.springer.com/article/10.1007%2Fs00027-005-0812-3	53	1	IRZ2006L	9	T	Temperate_floodplain_rivers_and_wetlands	Central_Western_Europe	FRANCE	47.0332	2.62033	71	L	.	MULTI	10.02	3.249	50	9.95	4.153	21	.	.	50	.	.	21	.	.	50	.	.	21	0.927293	.	50	0.932637	.	21	3.49016	.	50	3.49161	.	21
Comparison between the fish communities of lakes, reservoirs and rivers: can natural systems help define the ecological potential of reservoirs?	Aquatic Sciences	2006	JOURNAL	Pascal Irz, Mélanie Odion, Christine Argillier, Didier Pont	https://rd.springer.com/article/10.1007%2Fs00027-005-0812-3	53	2	IRZ2006R	10	T	Temperate_floodplain_rivers_and_wetlands	Central_Western_Europe	FRANCE	47.0332	2.62033	599	R	.	MULTI	10.02	3.25	50	9.59	4.2	549	.	.	50	.	.	549	.	.	50	.	.	549	0.927293	.	50	0.7888	.	549	3.49016	.	50	3.27519	.	549
Convergence of fish communities from the littoral zone of reservoirs	Freshwater Biology	2009	JOURNAL	KEITH B. GIDO, JACOB F. SCHAEFER, JEFFREY A. FALKE	https://onlinelibrary.wiley.com/doi/full/10.1111/j.1365-2427.2008.02162.x	54	1	GI2009M	11	T	.	.	USA	38.8312	-96.7398	53	R	.	MULTI	19.8	2.8	9	12.3	4	44	.	.	9	.	.	44	.	.	9	.	.	44	.	.	9	.	.	44	.	.	9	.	.	44
Convergence of fish communities from the littoral zone of reservoirs	Freshwater Biology	2009	JOURNAL	KEITH B. GIDO, JACOB F. SCHAEFER, JEFFREY A. FALKE	https://onlinelibrary.wiley.com/doi/full/10.1111/j.1365-2427.2008.02162.x	54	1	GI2009A	12	T	.	.	USA	36.45	-96.37	89	R	.	MULTI	25.9	5.1	16	15.7	7.4	73	.	.	16	.	.	73	.	.	16	.	.	73	.	.	16	.	.	73	.	.	16	.	.	73
Convergence of fish communities from the littoral zone of reservoirs	Freshwater Biology	2009	JOURNAL	KEITH B. GIDO, JACOB F. SCHAEFER, JEFFREY A. FALKE	https://onlinelibrary.wiley.com/doi/full/10.1111/j.1365-2427.2008.02162.x	54	1	GI2009R	13	T	.	.	USA	34.24	-96.3501	21	R	.	MULTI	26.4	7.2	5	27.8	10.1	16	.	.	5	.	.	16	.	.	5	.	.	16	.	.	5	.	.	16	.	.	5	.	.	16
Changes in Fish Assemblage Structure Upstream of Impoundments within the Upper Wabash River Basin, Indiana	Transactions of the American Fisheries Society	2005	JOURNAL	Cameron B. Guenther and Anne Spacie	https://www.tandfonline.com/doi/abs/10.1577/T05-031.1#.U1pYPrSurpc	55	1	G&S2005	14	T	Temperate_upland_rivers	Teays_Old_Ohio	USA	40.8331	-85.6868	22	R	UR	.	15	4	11	12	2.5	11	.	.	11	.	.	11	.	.	11	.	.	11	0.741902		11	0.759534		11	3.13417	.	11	3.32574	.	11
Comparison of Flow Regulation Effects on Fish Assemblages in Shallow and Deep Water Habitats in the Tallapoosa River, Alabama	Journal of Freshwater Ecology	1994	JOURNAL	Vincent H. Travnichek and Michale J. Maceina	https://www.tandfonline.com/doi/abs/10.1080/02705060.1994.9664888	56	1	TRAV1994D1	15	T	Temperate_floodplain_rivers_and_wetlands	Mobile_Bay	USA	33.1389	-85.6248	4	R	D	HYDRO	36	7.07107	2	20.5	2.12132	2	2.82636	0.00362234	2	2.11174	0.141246	2	0.792044	0.0428012	2	0.699382	0.0227804	2	0.896286	0.0141706	2	0.935282	0.0469025	2	3.24357	0.0109119	2	3.22022	0.0237864	2
Comparison of Flow Regulation Effects on Fish Assemblages in Shallow and Deep Water Habitats in the Tallapoosa River, Alabama	Journal of Freshwater Ecology	1994	JOURNAL	Vincent H. Travnichek and Michale J. Maceina	https://www.tandfonline.com/doi/abs/10.1080/02705060.1994.9664888	56	2	TRAV1994D2	16	T	Temperate_floodplain_rivers_and_wetlands	Mobile_Bay	USA	33.1389	-85.6248	5	R	D	HYDRO	26	1	3	20.5	2.12132	2	2.31042	0.121506	3	2.11174	0.141246	2	0.709576	0.04532	3	0.699382	0.0227804	2	0.943833	0.0335075	3	0.935282	0.0469025	2	3.26129	0.0332043	3	3.22022	0.0237864	2
Comparison of Flow Regulation Effects on Fish Assemblages in Shallow and Deep Water Habitats in the Tallapoosa River, Alabama	Journal of Freshwater Ecology	1994	JOURNAL	Vincent H. Travnichek and Michale J. Maceina	https://www.tandfonline.com/doi/abs/10.1080/02705060.1994.9664888	56	3	TRAV1994S2	17	T	Temperate_floodplain_rivers_and_wetlands	Mobile_Bay	USA	33.1389	-85.6248	5	R	D	HYDRO	23.3333	4.04145	3	28	2.82843	2	2.20737	0.582874	2	2.1176	0.204356	2	0.667685	0.134546	2	0.642381	0.0415838	2	0.259389	0.0849864	2	0.599933	0.255945	2	2.98527	0.010348	2	2.90313	0.14638	2
Comparison of Flow Regulation Effects on Fish Assemblages in Shallow and Deep Water Habitats in the Tallapoosa River, Alabama	Journal of Freshwater Ecology	1994	JOURNAL	Vincent H. Travnichek and Michale J. Maceina	https://www.tandfonline.com/doi/abs/10.1080/02705060.1994.9664888	56	4	TRAV1994S1	18	T	Temperate_floodplain_rivers_and_wetlands	Mobile_Bay	USA	33.1389	-85.6248	4	R	D	HYDRO	28	5.65685	2	28	2.82843	2	2.19591	0.207564	3	2.1176	0.204356	2	0.708852	0.0316098	3	0.642381	0.0415838	2	0.478896	0.0513409	3	0.599933	0.255945	2	3.11405	0.143887	3	2.90313	0.14638	2
Upstream Extirpation of Four Minnow Species Due to Damming of a Prairie Stream	Transactions of the American Fisheries Society	1990	JOURNAL	Matthew R. Winston, Christopher M. Taylor and Jimmie Pigg	https://www.tandfonline.com/doi/abs/10.1577/1548-8659%281991%29120%3C0098%3AUEOFMS%3E2.3.CO%3B2#.VZQmD0Y02TI	57	1	WINST1990	19	T	Temperate_upland_rivers	US_Southern_Plains	USA	34.5177	-98.9039	17	R	UR	.	24	1.41421	15	33	7.77817	2	.	.	15	.	.	2	.	.	15	.	.	2	0.346658	.	15	0.264857	.	2	2.82821	.	15	2.88968	.	2
Upstream Extirpation of Four Minnow Species Due to Damming of a Prairie Stream	Transactions of the American Fisheries Society	1990	JOURNAL	Matthew R. Winston, Christopher M. Taylor and Jimmie Pigg	https://www.tandfonline.com/doi/abs/10.1577/1548-8659%281991%29120%3C0098%3AUEOFMS%3E2.3.CO%3B2#.VZQmD0Y02TI	57	2	WINST1990	20	T	Temperate_upland_rivers	US_Southern_Plains	USA	34.5177	-98.9039	17	R	D	.	34	1.41421	10	33	7.77817	7	.	.	10	.	.	7	.	.	10	.	.	7	.	.	10	.	.	7	.	.	10	.	.	7
Reservoirs promote the taxonomic homogenization of fish communities within river basins	Biodiversity and Conservation	2010	JOURNAL	Miguel Clavero, Virgilio Hermoso	https://rd.springer.com/article/10.1007/s10531-010-9945-3	58	1	CLAVERO2010	21	T	Temperate_floodplain_rivers_and_wetlands	Southern_Iberia	SPAIN	38.3931	-5.94958	241	R	.	.	4.26802	1.88088	59	3.75698	1.96981	182	.	.	59	.	.	182	.	.	59	.	.	182	.	.	59	.	.	182	.	.	59	.	.	182
Response by fish assemblages to an environmental flow release in a temperate coastal Australian river: A paired catchment analysis	River Research and Applications	2010	JOURNAL	R. J. Rolls, A. J. Boulton, I. O. Growns, S. E. Maxwell	https://onlinelibrary.wiley.com/doi/abs/10.1002/rra.1402	59	1	ROLLSETAL2010	22	T	Temperate_coastal_rivers	Eastern_Coastal_Australia	AUSTRALIA	-32.7947	151.708	4	R	D	MULTI	10	1.41421	2	9	1.41421	2	.	.	2	.	.	2	.	.	2	.	.	2	0.697721	0.257835	2	0.76184	0.245441	2	3.07758	0.149343	2	2.99493	0.16677	2
Effects of Small Dams on Cold Water Stream Fish Communities	American Fisheries Society Symposium	2006	REPORT	Daniel B. Hayes, Hope Dodd, Joanna Lessard	https://www.google.com/url?sa=t&rct=j&q=&esrc=s&source=web&cd=2&ved=0ahUKEwjDmPSt2IrbAhVHxoMKHW1eC4kQFggrMAE&url=https%3A%2F%2Fpdfs.semanticscholar.org%2F2990%2Fd3870f0943ac1bb41acd009ad7fc854ae44f.pdf&usg=AOvVaw2vBjGtIlpYHaCOIUyyLos2	60	1	HAYESETAL2006UL	23	T	Large_lakes	Laurentian_Great_Lakes	USA	45.107	-84.3986	25	R	UD	HYDRO	17.5	4.94975	2	9.7	3.83667	23	.	.	2	.	.	23	.	.	2	.	.	23	.	.	2	.	.	23			2	.	.	23
Effects of Small Dams on Cold Water Stream Fish Communities	American Fisheries Society Symposium	2006	REPORT	Daniel B. Hayes, Hope Dodd, Joanna Lessard	https://www.google.com/url?sa=t&rct=j&q=&esrc=s&source=web&cd=2&ved=0ahUKEwjDmPSt2IrbAhVHxoMKHW1eC4kQFggrMAE&url=https%3A%2F%2Fpdfs.semanticscholar.org%2F2990%2Fd3870f0943ac1bb41acd009ad7fc854ae44f.pdf&usg=AOvVaw2vBjGtIlpYHaCOIUyyLos2	60	2	HAYESETAL2006DL	24	T	Large_lakes	Laurentian_Great_Lakes	USA	45.107	-84.3986	25	R	D	HYDRO	13	2.82843	2	11.4	3.35708	23	.	.	2	.	.	23	.	.	2	.	.	23	.	.	2	.	.	23	.	.	2	.	.	23
Effects of Small Dams on Cold Water Stream Fish Communities	American Fisheries Society Symposium	2006	REPORT	Daniel B. Hayes, Hope Dodd, Joanna Lessard	https://www.google.com/url?sa=t&rct=j&q=&esrc=s&source=web&cd=2&ved=0ahUKEwjDmPSt2IrbAhVHxoMKHW1eC4kQFggrMAE&url=https%3A%2F%2Fpdfs.semanticscholar.org%2F2990%2Fd3870f0943ac1bb41acd009ad7fc854ae44f.pdf&usg=AOvVaw2vBjGtIlpYHaCOIUyyLos2	60	3	HAYESETAL2006UH	25	T	Large_lakes	Laurentian_Great_Lakes	USA	45.107	-84.3986	31	R	UD	HYDRO	12	6.78823	8	9.7	3.83667	23	.	.	8	.	.	23	.	.	8	.	.	23	.	.	8	.	.	23	.	.	8	.	.	23
Effects of Small Dams on Cold Water Stream Fish Communities	American Fisheries Society Symposium	2006	REPORT	Daniel B. Hayes, Hope Dodd, Joanna Lessard	https://www.google.com/url?sa=t&rct=j&q=&esrc=s&source=web&cd=2&ved=0ahUKEwjDmPSt2IrbAhVHxoMKHW1eC4kQFggrMAE&url=https%3A%2F%2Fpdfs.semanticscholar.org%2F2990%2Fd3870f0943ac1bb41acd009ad7fc854ae44f.pdf&usg=AOvVaw2vBjGtIlpYHaCOIUyyLos2	60	4	HAYESETAL2006DUH	26	T	Large_lakes	Laurentian_Great_Lakes	USA	45.107	-84.3986	31	R	D	HYDRO	16.6	4.80833	8	11.4	3.35708	23	.	.	8	.	.	23	.	.	8	.	.	23	.	.	8	.	.	23	.	.	8	.	.	23
Upstream and downstream responses of fish assemblages to an eastern Amazonian hydroelectric dam	Freshwater Biology	2015	JOURNAL	Júlio C. Sá‐Oliveira, Joseph E. Hawes, Victoria J. Isaac‐Nahum, Carlos A. Peres	https://onlinelibrary.wiley.com/doi/abs/10.1111/fwb.12628	61	1	SO2015L	27	TR	Large_river_deltas	Amazonas_Estuary_&_Coastal_Drainages	BRAZIL	0.923438	-51.0156	16	L	UD	HYDRO	16.12	2.74	8	14.5	3.79	8	.	.	8	.	.	8	.	.	8	.	.	8	.	.	8	.	.	8	.	.	8	.	.	8
Upstream and downstream responses of fish assemblages to an eastern Amazonian hydroelectric dam	Freshwater Biology	2015	JOURNAL	Júlio C. Sá‐Oliveira, Joseph E. Hawes, Victoria J. Isaac‐Nahum, Carlos A. Peres	https://onlinelibrary.wiley.com/doi/abs/10.1111/fwb.12628	61	2	SO2015R	28	TR	Large_river_deltas	Amazonas_Estuary_&_Coastal_Drainages	BRAZIL	0.923438	-51.0156	16	R	DD	HYDRO	16.12	2.74	8	26	7.5519	8	.	.	8	.	.	8	.	.	8	.	.	8	.	.	8	.	.	8	.	.	8	.	.	8
Spatial and seasonal fish community patterns in impacted and protected semi-arid rivers of Burkina Faso	Ecological Engineering	2012	JOURNAL	Andreas H. Melcher, Raymond Ouedraogo, Stefan Schmutz	https://www.sciencedirect.com/science/article/pii/S0925857411002655	62	1	MELCHER2012	29	TR	Tropical_and_subtropical_floodplain_rivers_and_wetland_complexes	Inner_Niger_Delta	BURKINA_FASO	12.5353	-1.89444	3	R	UD	MULTI	24	1.41421	2	48	0	1	.	.	2	.	.	1	.	.	2	.	.	1	.	.	2	.	.	1	.	.	2	.	.	1
Spatial and seasonal fish community patterns in impacted and protected semi-arid rivers of Burkina Faso	Ecological Engineering	2012	JOURNAL	Andreas H. Melcher, Raymond Ouedraogo, Stefan Schmutz	https://www.sciencedirect.com/science/article/pii/S0925857411002655	62	2	MELCHER2012	30	TR	Tropical_and_subtropical_floodplain_rivers_and_wetland_complexes	Inner_Niger_Delta	BURKINA_FASO	12.5353	-1.89444	3	R	D	MULTI	30	2.82843	2	48	0	1	.	.	2	.	.	1	.	.	2	.	.	1	.	.	2	.	.	1	.	.	2	.	.	1
Trophic aspects of fish communities in Brazilian Rivers and Reservoirs	Limnology in Brazil (ed. Jose Galizia Tundisi and Takako Matsumura Tundisi)	1993	BOOK CHAPTER	Carlos A.R.M. Arunjo Lima, Angelo A. Agostinho, Nidia N. Fabré	NA	63	1	ARUNJO1993	31	TR	.	.	BRAZIL	-7.13962	-52.3071	34	R	.	HYDRO	36.0301	28.6309	18	23.4339	13.7685	16	.	.	18	.	.	16	.	.	18	.	.	16	.	.	18	.	.	16	.	.	18	.	.	16
Trophic aspects of fish communities in Brazilian Rivers and Reservoirs	Limnology in Brazil (ed. Jose Galizia Tundisi and Takako Matsumura Tundisi)	1993	BOOK CHAPTER	Carlos A.R.M. Arunjo Lima, Angelo A. Agostinho, Nidia N. Fabré	NA	63	2	ARUNJO1993	32	TR	.	.	BRAZIL	-7.13962	-52.3071	27	R	.	HYDRO	36.0301	28.6309	18	137.108	69.3832	9	.	.	18	.	.	9	.	.	18	.	.	9	.	.	18	.	.	9	.	.	18	.	.	9
Assessing the natural and anthropogenic influences on basin-wide fish species richness	Science of The Total Environment	2016	JOURNAL	Su-Ting Cheng, Edwin E.Herricks, Wen-Ping Tsai, Fi-John Chang	https://www.sciencedirect.com/science/article/pii/S0048969716315571	64	1	CHENG2016	33	TR	Tropical_and_subtropical_coastal_rivers	Western_Taiwan	TAIWAN	25.0353	121.49	37	R	D	.	5.06402	2.86502	17	5.94591	2.48276	20	.	.	17	.	.	20	.	.	17	.	.	20	.	.	17	.	.	20	.	.	17	.	.	20
The role of dams in altering freshwater fish communities in New Zealand	New Zealand Journal of Marine and Freshwater Research	2012	JOURNAL	PG. Jellyman and JS Harding	https://www.tandfonline.com/doi/abs/10.1080/00288330.2012.708664	65	1	JELLYMAN2012A	34	T	Temperate_coastal_rivers	New_Zealand	NEW_ZEALAND	-41.1296	174.566	52	R	UD	MULTI	7.3	4.38178	30	9	4.22137	22	.	.	30	.	.	22	.	.	30	.	.	22	.	.	30	.	.	22	.	.	30	.	.	22
The role of dams in altering freshwater fish communities in New Zealand	New Zealand Journal of Marine and Freshwater Research	2012	JOURNAL	PG. Jellyman and JS Harding	https://www.tandfonline.com/doi/abs/10.1080/00288330.2012.708664	65	2	JELLYMAN2012B	35	T	Temperate_coastal_rivers	New_Zealand	NEW_ZEALAND	-41.1296	174.566	52	R	D	MULTI	12.1	4.38178	30	10.1	3.75233	22	.	.	30	.	.	22	.	.	30	.	.	22	.	.	30	.	.	22	.	.	30	.	.	22
Fish community alterations due to pollution and damming in Tietê and Paranapanema rivers (Brazil)	River Research and Applications	2003	JOURNAL	Walter Barrella, Miguel Petrere Jr	https://onlinelibrary.wiley.com/doi/abs/10.1002/rra.697	66	1	B&P2003D	36	TR	Tropical_and_subtropical_upland_rivers	Upper_Parana	BRAZIL	-21.8296	-50.4664	26	R	.	HYDRO	11.8333	4.50925	12	11.5	6.92543	14	1.71136	0.374587	12	1.4946	0.617666	14	0.712591	0.119994	12	0.682492	0.216978	14	0.718186	0.260242	12	0.739521	0.200571	14	2.82024	0.255851	12	2.81587	0.328463	14
Fish community alterations due to pollution and damming in Tietê and Paranapanema rivers (Brazil)	River Research and Applications	2003	JOURNAL	Walter Barrella, Miguel Petrere Jr	https://onlinelibrary.wiley.com/doi/abs/10.1002/rra.697	66	2	B&P2003R	37	TR	Tropical_and_subtropical_upland_rivers	Upper_Parana	BRAZIL	-21.8296	-50.4664	26	R	.	HYDRO	12.3846	5.09147	13	7.76923	4.98588	13	1.81928	0.407105	13	1.34868	0.621298	13	0.711411	0.112813	13	0.669968	0.234307	13	0.77616	0.172436	13	0.803665	0.215446	13	3.00009	0.34695	13	2.90735	0.528123	13
[truncated: 16 more columns]

## Sheet: METADATA_S1.1
DESCRIPTOR	VARIABLE	DESCRIPTION
Study and ref. descriptors	TITLE	Title of the article or report
	JOURNAL	Name of the journal or report type if in the grey literature
	DATE	Date of publication
	AUTHORS	Name of the authors of the paper or report
	WEB_LINK	url link to access the paper or report on the internet (last accessed on January 17th 2019)
	REFNB	Reference number for papers and reports used in the meta-analyse
	REF	Short descriptor for the reference
	N	Number of observation in the time series for longitudinal studies
	OBS_R	ID number for observation i in reference k
	OBS_ID	ID number for observation i in reservoir or sampling station j in reference k
	STUDY_ID	Reference number
Geographic descriptors	BIOME	Biome as being Tropical (TR), temperate (T) or Boreal (B)
	HABITAT_TYPE	Major habitat type extracted from the Freshwater Ecoregions of the World; http://www.feow.org/
	FECOREGION	Freshwater ecoregion name extracted from the Freshwater Ecoregions of the World; http://www.feow.org/
	COUNTRY	Country in which the reservoir is located
	LATITUDE	Geographical coordinate of the Latitude in DMS (degrees, minutes, secondes) extracted from Google maps; https://www.google.com/maps
	LONGITUDE	Geographical coordinate of the Longitude in DMS (degrees, minutes, secondes) extracted from Google maps; https://www.google.com/maps
	LAT	Geographical coordinate of the Latitude in DD (Decimal degrees) extracted from Google maps; https://www.google.com/maps
	LONG	Geographical coordinate of the Longitude in DD (Decimal degrees) extracted from Google maps; https://www.google.com/maps
Characteristics of the reservoir or time series	NAME	Name de reservoir
	DAM	Name of dam
	STATION	Name or number of sampling station
	PURPOSE	Usage of the reservoir (MULTI = multi-usage; HYDRO = Hydropower; COOLING = Cooling reservoir for energy production; FLOOD_CONT = Flood control; IRRIGATION = irrigation; RECREATION = recrational use; WATER_SUP = water supply)
	UP_D	Location of the station in relation to the dam (UP = UPSTREAM, D = DOWNSTREAM)
	DIST_DAM	Distance from the dam in m; Calculated in QGIS
	FILLING_TIME	Time it took to fill the reservoir
	DD(mean)	Mean annual drawdown
	DD(MAX)	Maximum drawdown
	AREA(KM2)	Area of the reservoir in km2
	AREA_BEFORE(KM2)	Area of the aquatic ecosystem before impoundment in km2
	AREA_FL(KM2)	Terrestrial area flooded in km2
	B_A(%)	Percentage of the reservoir that was flooded (area before/area)
	ARCHETYPE	Reservoir archetype (D = dentritic, L = lake, C = canyon)
	PERIM/AREA	Perimeter/area ratio
	CATCHMENT	Catchment area (km2)
	DEPTH	Mean water depth (m)
	IMPOUNDED	Year at which the reservoir was impounded
	DATE	Year at which data was collected
	YEARS	Time in years before or after impoundment (DATE - IMPOUNDED)
	DURATION	Duration of the study after impoundment
	BA	B = data collected before impoundment, A = data collected after impoundment
Biodiversity and species assemblages metrics	RICHNESS	The number of species observed at time t (t = YEARS)
	INVASIVE_INTRO	The number of non-native species observed at time t (t = YEARS)
	SH_DIV	Shannon Weaver diversity index observed at time t (t = YEARS)
	SHE_DIV	Evenness observed at time t (t = YEARS)
	COMMU	Data on species abundance or relative abundance in the reference (Y = Yes, N = No)
	TROPHIC_LEVEL	Mean trophic level position extracted from Fishbase when data on fish abundance was available (computed in another file)
	MACROH	Mean macrohabitat flow guild when data on fish abundance was available (computed in another file)
Mechanisms identified as being influential to structure fish community in reservoirs	BARRIER	Dam as being a barrier to movement for migratory species
	CONNECT	Changes in riverscape connectivity (increase in connectivity) following impoundment
	LOT_LENT	Hydrological changes from a lotic ecosystem toward a lentic ecosystem
	INV_INT	Apperance of non-native species in the water body. Non-native can be introduced exotic species but also species that are present locally but not in this body of water
	TRO_INT	Changes in the strength of trophic interactions in the foodweb
	TEMP	Changes in the temperature regime
	SEDIM	Changes in the sedimentation regime
	WLF	Impacts of water level fluctuations in the reservoirs (drawdown)
	DISCH_D	Change in discharge and flow
	WQ	Change in water quality
	OVERFIS	Overfishing occuring in the reservoir
Other information	MULTI	If the reservoir was part of a complex or a complex of cascade reservoirs
	CONFOUDING	If counfounding factor was identified in the study
	COMPARABLE EFFORT	Comparable effort across years
	RAR_RICH	If rarefied richness was computed in the study
	COMMENTS	Other relevant comments for the study

## Sheet: METADATA_S1.2
DESCRIPTOR	VARIABLE	DESCRIPTION
Study and ref. descriptors	TITLE	Title of the article or report
	JOURNAL	Name of the journal or report type if in the grey literature
	DATE	Date of publication
	AUTHORS	Name of the authors of the paper or report
	WEB_LINK	url link to access the paper or report on the internet (last accessed on January 17th 2019)
	REFNB	Reference number for papers and reports used in the meta-analyse
	REFID	ID number for reference i
	REF	Short descriptor for the reference
	STUDYID	Study ID j in reference number i
Geographic descriptors	BIOME	Biome as being Tropical (TR), temperate (T) or Boreal (B)
	HABITAT_TYPE	Major habitat type extracted from the Freshwater Ecoregions of the World; http://www.feow.org/
	FECOREGION	Freshwater ecoregion name extracted from the Freshwater Ecoregions of the World; http://www.feow.org/
	COUNTRY	Country in which the reservoir is located
	LAT	Geographical coordinate of the Latitude in DD (Decimal degrees) extracted from Google maps; https://www.google.com/maps
	LONG	Geographical coordinate of the Longitude in DD (Decimal degrees) extracted from Google maps; https://www.google.com/maps
Characteristics of the ecosystems	N	Total number of ecosystems studies (regulated + unregulated)
	ECOS	Type of reference ecosystems; L = lakes as reference ecosystems, R = rivers or streams as reference ecosystems
	U_D	Location of the station in relation to the dam (UP = UPSTREAM, D = DOWNSTREAM)
	PURPOSE	Usage of the reservoir (MULTI = multi-usage; HYDRO = Hydropower; COOLING = Cooling reservoir for energy production; FLOOD_CONT = Flood control; IRRIGATION = irrigation; RECREATION = recrational use; WATER_SUP = water supply)
Biodiversity and species assemblages metrics	Rm1i	Mean of richness values in regulated ecosystems
	Rsd1i	Standard deviation of richness values in regulated ecosystems
	Rn1i	Number of sampling stations (or reservoirs) with richness values in in regulated ecosystems
	Rm2i	Mean of richness values in unregulated ecosystems
	Rsd2i	Standard deviation of richness values in unregulated ecosystems
	Rn2i	Number of sampling stations (or reservoirs) with richness values in in unregulated ecosystems
	Dm1i	Mean of diversity values in regulated ecosystems
	Dsd1i	Standard deviation of diversity values in regulated ecosystems
	Dn1i	Number of sampling stations (or reservoirs) with diversity values in in regulated ecosystems
	Dm2i	Mean of diversity values in unregulated ecosystems
	Dsd2i	Standard deviation of diversity values in unregulated ecosystems
	Dn2i	Number of sampling stations (or reservoirs) with diversity values in in unregulated ecosystems
	Em1i	Mean of evenness values in regulated ecosystems
	Esd1i	Standard deviation of evenness values in regulated ecosystems
	En1i	Number of sampling stations (or reservoirs) with evenness values in in regulated ecosystems
	Em2i	Mean of evenness values in unregulated ecosystems
	Esd2i	Standard deviation of evenness values in unregulated ecosystems
	En2i	Number of sampling stations (or reservoirs) with evenness values in in unregulated ecosystems
	MFGm1i	Mean of macrohabitat flow guild values in regulated ecosystems
	MFGsd1i	Standard deviation of macrohabitat flow guild values in regulated ecosystems
	MFGn1i	Number of sampling stations (or reservoirs) with macrohabitat flow guild values in in regulated ecosystems
	MFGm2i	Mean of macrohabitat flow guild values in unregulated ecosystems
	MFGsd2i	Standard deviation of macrohabitat flow guild values in unregulated ecosystems
	MFGn2i	Number of sampling stations (or reservoirs) with macrohabitat flow guild values in in unregulated ecosystems
	MTLm1i	Mean of mean trophic level position values in regulated ecosystems
	MTLsd1i	Standard deviation of mean trophic level position values in regulated ecosystems
	MTLn1i	Number of sampling stations (or reservoirs) with mean trophic level position values in in regulated ecosystems
	MTLm2i	Mean of mean trophic level position values in unregulated ecosystems
	MTLsd2i	Standard deviation of mean trophic level position values in unregulated ecosystems
	MTLn2i	Number of sampling stations (or reservoirs) with mean trophic level position values in in unregulated ecosystems
Mechanisms identified as being influential to structure fish community in reservoirs	BARRIER	Dam as being a barrier to movement for migratory species
	CONNECT	Changes in riverscape connectivity (increase in connectivity) following impoundment
	LOT_LENT	Hydrological changes from a lotic ecosystem toward a lentic ecosystem
	INV_INT	Apperance of non-native species in the water body. Non-native can be introduced exotic species but also species that are present locally but not in this body of water
	TRO_INT	Changes in the strength of trophic interactions in the foodweb
	TEMP	Changes in the temperature regime
	SEDIM	Changes in the sedimentation regime
	WLF	Impacts of water level fluctuations in the reservoirs (drawdown)
	DISCH_D	Change in discharge and flow
	WQ	Change in water quality
	OVERFIS	Overfishing occuring in the reservoir
Other information	MULTI	If the reservoir was part of a complex or a complex of cascade reservoirs
	CONFOUDING	If counfounding factor was identified in the study
	COMPARABLE EFFORT	Comparable effort across years
	RAR_RICH	If rarefied richness was computed in the study
	COMMENTS	Other relevant comments for the study

## Sheet: REFERENCES
REFID	DATA (LD, CS)	TITLE	JOURNAL	DATE	CATEGORY	AUTHORS	WEB_LINK
1	LD	Fish Assemblage Changes in an Ozark River after Impoundment: A Long-Term Perspective	Transactions of the American Fisheries Society	2003	JOURNAL	Quinn, J. W., and T. J. Kwak.	https://www.tandfonline.com/doi/abs/10.1577/1548-8659(2003)132%3C0110%3AFACIAO%3E2.0.CO%3B2#.U0vPzrSurpc
2	LD	Species Composition and Biomass of Fish in Selected Coves in Beaver Lake, Arkansas, during the First 18 Years of Impoundment (1963-1980)	North American Journal of Fisheries Management	1982	JOURNAL	William C. Rainwater, Alfred Houser	https://onlinelibrary.wiley.com/doi/abs/10.1577/1548-8659%281982%292%3C316%3ASCABOF%3E2.0.CO%3B2
3	LD	Changes in the Canadian River Fish Assemblage Associated with Reservoir Construction	Journal of Freshwater Ecology	2000	JOURNAL	Bonner, T. H., and G. R. Wilde	https://www.tandfonline.com/doi/abs/10.1080/02705060.2000.9663736#.U0Ku9rSurpc
4	LD	Upstream effects of a reservoir on fish assemblages 45 years following impoundment	Journal of Fish Biology	2013	JOURNAL	N. R. Franssen, M. Tobler	https://onlinelibrary.wiley.com/doi/abs/10.1111/jfb.12108
5	LD	Long-term changes in a reservoir fish assemblage: stability in an unpredictable environment	Ecological Applications	2000	JOURNAL	Keith B. Gido, William J. Matthews, William C. Wolfinbarger	https://esajournals.onlinelibrary.wiley.com/doi/abs/10.1890/1051-0761%282000%29010%5B1517%3ALTCIAR%5D2.0.CO%3B2
6	LD	Consequences of stream impoundment on fish communities in a small North American drainage	Regulated Rivers: Research & Management	2001	JOURNAL	Christopher A. Taylor, Jason H. Knouft, Tim M. Hiland	https://onlinelibrary.wiley.com/doi/abs/10.1002/rrr.629
7	LD	Fish species composition before and after construction of a main stem reservoir on the White River, Colorado	Environmental Biology of Fishes	1994	JOURNAL	Patrick J. Martinez, Thomas E. Chart, Melissa A. Trammell, John G. Wullschleger, Eric P. Bergersen	https://rd.springer.com/article/10.1007/BF00002509
8	LD	Species changes in reservoir fisheries following impoundment: the case of Lake Itezhi-tezhi, Zambia	Book: The Impact of Species Changes in African Lakes	1995	BOOK	Ian G. Cowx, Cyprian K. Kapasa	https://rd.springer.com/chapter/10.1007%2F978-94-011-0563-7_15
9	LD	An analysis of fish distribution in Kainji lake Nigeria	Hydrobiologia	1978	JOURNAL	E. O. Ita	https://rd.springer.com/article/10.1007/BF02346958
10	LD	Long-term development of fish populations in the Římov Reservoir	Fisheries Management and Ecology	2009	JOURNAL	M. ŘÍHA, J. KUBEČKA, M. VAŠEK, J. SE?A, T. MRKVIČKA, M. PRCHALOVÁ, J. MATĒNA, M. HLADÍK, M. ČECH, V. DRAŠTÍK, J. FROUZOVÁ, E. HOHAUSOVÁ , O. JAROLÍM, T. JŮZA, M. KRATOCHVÍL, J. PETERKA, M. TUŠER	https://onlinelibrary.wiley.com/doi/full/10.1111/j.1365-2400.2008.00650.x
11	LD	Fisheries problems associated with development of the Peace River and its upper tributaries for hydroelectric purposes	Province of BC Fisheries Management, Fisheries Technical Circular No. 68	1959	REPORT	I.L. Withler	https://www.google.com/url?sa=t&rct=j&q=&esrc=s&source=web&cd=3&cad=rja&uact=8&ved=0ahUKEwiH1az73-zaAhUDpFkKHeKkBd4QFgg3MAI&url=http%3A%2F%2Fa100.gov.bc.ca%2Fpub%2Facat%2Fpublic%2FviewReport.do%3FreportId%3D40780&usg=AOvVaw3SsPOqOoINfP0R6Xyve_sC
12	LD	Fisheries Resources and Fisheries Potential of Williston Reservoir and Its Tributary Streams - Volume I: Fisheries Resources and Fisheries Potential of Williston Reservoir		1985	REPORT	D.T. Barrett, T.G. Halsey	http://www.env.gov.bc.ca/wld/documents/fisheriesrpts/FTC68.pdf
13	LD	Fisheries resources of Williston reservoir twenty years after impoundment	Report B.C. Environment Fisheries Branch & B.C. Hydro Environmental resources	1992	REPORT	B.G. Blackman	https://www.for.gov.bc.ca/hfd/library/documents/bib109349.pdf
14	LD	Large dam reservoirs are probably long-period oscillators of fish diversity	Journal of Fish Biology	2012	JOURNAL	Ł. Głowacki, T. Penczak	https://onlinelibrary.wiley.com/doi/abs/10.1111/j.1095-8649.2012.03274.x
15	LD	Effects of the construction of a reservoir on the fish assemblage in an inflow river	Czech Journal of Animal Science - UZPI (Czech Republic)	2008	JOURNAL	Milan Hladík, Jan Kubečka, Tomáš Mrkvička, Martin Čech, Vladislav Draštík, Jaroslava Frouzová, Eva Hohausová, Josef Matěna, V Matěnová, Michal Kratochvíl, Jiří Peterka, Marie Prchalová, Mojmír Vašek	https://www.google.com/url?sa=t&rct=j&q=&esrc=s&source=web&cd=2&cad=rja&uact=8&ved=0ahUKEwiop82E5ezaAhXEjVkKHUVeCqMQFggvMAE&url=http%3A%2F%2Fciteseerx.ist.psu.edu%2Fviewdoc%2Fdownload%3Fdoi%3D10.1.1.627.694%26rep%3Drep1%26type%3Dpdf&usg=AOvVaw2P-kpnNHCwh7_eQNr1kLK6
16	LD	The Effect of Hypolimnion Reservoir Releases on Fish Distribution and Species Diversity	Transactions of the American Fisheries Society	1978	JOURNAL	Robert J. Edwards	https://www.tandfonline.com/doi/abs/10.1577/1548-8659(1978)107%3C71:TEOHRR%3E2.0.CO;2#.Uu__irTwDpc
17	LD	Long-Term Changes in the Fish Assemblages of the Big Blue River Basin 40 Years after the Construction of Tuttle Creek Reservoir	Transactions of the Kansas Academy of Science	2002	JOURNAL	Keith B. Gido, Christopher S. Guy, Timothy R. Strakosh, Randal J. Bernot, Kristen J. Hase, and Mark A. Shaw	http://www.bioone.org/doi/abs/10.1660/0022-8443(2002)105%5B0193:LTCITF%5D2.0.CO%3B2
18	LD	The fish fauna of Brokopondo Reservoir, Suriname, during 40 years of impoundment	Neotropical Ichthyology	2007	JOURNAL	Jan H. Mol; Bernard de Mérona; Paul E. Ouboter ; Shamita Sahdew	http://www.scielo.br/scielo.php?pid=S1679-62252007000300015&script=sci_arttext
19	LD	Alternative ways to measure impacts of dam closure to the structure of fish communities of a neotropical river	Ecohydrology	2016	JOURNAL	Ana Carolina Lima, Carlos Sérgio Agostinho, Amadeu M.V.M. Soares, Kieran A. Monaghan	https://onlinelibrary.wiley.com/doi/abs/10.1002/eco.1688
[truncated: 47 more rows]
